# Supplementary material for: Relation of Different Fruit and Vegetable Sources With Incident Cardiovascular Outcomes: A Systematic Review and Meta‐Analysis of Prospective Cohort Studies
Source: PubMed Central journal article supplement — J Am Heart Assoc. 2020 Oct 1;9(19):e017728. doi: 10.1161/JAHA.120.017728 (PMC7792377; doi:10.1161/jaha.120.017728), 2020-10-01
Supplement: JAH3-9-e017728-s001.pdf [file JAH3-9-e017728-s001.pdf]

# **Supplemental Material**

**Table S1. Search Strategy.**

| <b>Search #</b> | <b>Medline<br/>1946 to June 03, 2019</b> | <b>Embase<br/>1946 to June 03, 2019</b> | <b>Cochrane<br/>Through to June 03, 2019</b> |
|-----------------|------------------------------------------|-----------------------------------------|----------------------------------------------|
| <b>1</b>        | Vegetables/                              | exp vegetable/                          | Vegetables/                                  |
| <b>2</b>        | vegetable*.tw,kf.                        | vegetable*.tw,kw.                       | vegetable*.ti,ab,hw.                         |
| <b>3</b>        | Vegetable Products/                      | 1 or 2                                  | 1 or 2                                       |
| <b>4</b>        | or/1-3                                   | fruit.mp.                               | fruit.mp.                                    |
| <b>5</b>        | fruit.mp.                                | exp Fruit/                              | Fruit/                                       |
| <b>6</b>        | exp Fruit/                               | 4 or 5                                  | 4 or 5                                       |
| <b>7</b>        | 5 or 6                                   | 3 or 6                                  | 3 or 6                                       |
| <b>8</b>        | 4 or 7                                   | cardiovascular disease/                 | cardiovascular diseases/                     |
| <b>9</b>        | cardiovascular disease/                  | cardiovascular.tw,kw.                   | exp myocardial ischemia/                     |
| <b>10</b>       | exp myocardial ischemia/                 | exp heart muscle ischemia/              | cardiovascular.ti,ab,hw.                     |
| <b>11</b>       | cardiovascular.tw,kf.                    | isch?em*.tw,kw.                         | isch?em*.ti,ab,hw.                           |
| <b>12</b>       | isch?em*.tw,kf.                          | coronary.tw,kw.                         | coronary.ti,ab,hw.                           |
| <b>13</b>       | coronary.tw,kf.                          | myocard*.tw,kw.                         | myocard*.ti,ab,hw.                           |
| <b>14</b>       | myocard*.tw,kf.                          | angina.tw,kw.                           | angina.ti,ab,hw.                             |
| <b>15</b>       | angina.tw,kf.                            | exp cerebrovascular disease/            | exp cerebrovascular disorders/               |
| <b>16</b>       | exp cerebrovascular disorders/           | stroke.tw,kw.                           | stroke*.ti,ab,hw.                            |
| <b>17</b>       | stroke*.tw,kf.                           | cerebral vascular.tw,kw.                | cerebral vascular.ti,ab,hw.                  |
| <b>18</b>       | cerebral vascular.tw,kf.                 | cerebrovascular.tw,kw.                  | cerebrovascular.ti,ab,hw.                    |
| <b>19</b>       | cerebrovascular.tw,kf.                   | Or / 8-18                               | Or / 8-                                      |
| <b>20</b>       | Or / 9-19                                | exp cohort analysis/                    |                                              |
| <b>21</b>       | exp cohort studies/                      | exp longitudinal study/                 |                                              |
| <b>22</b>       | cohort*.tw.                              | exp prospective study/                  |                                              |
| <b>23</b>       | controlled clinical trial.pt.            | exp follow up/                          |                                              |
| <b>24</b>       | Epidemiologic methods/                   | cohort\$.tw.                            |                                              |
| <b>25</b>       | limit 24 to yr=1971-1988                 | Or / 20-24                              |                                              |
| <b>26</b>       | Or / 21- 25                              | 7 and 19                                |                                              |
| <b>27</b>       | 8 and 20                                 | 25 and 26                               |                                              |
| <b>28</b>       | 26 and 27                                |                                         |                                              |

**Table S2. Confounding Variables Among 117 Studies of Fruit and Vegetables and Cardiovascular Disease Outcomes.**

| Study                                                 | Adriouch, 2018 <sup>42</sup> | Appleby, 2002 <sup>43</sup> | Atkins, 2014 <sup>44</sup> | Bahadoran, 2017 <sup>45</sup> | Bazzano, 2002 <sup>46</sup> | Belin, 2011 <sup>47</sup> | Bendinelli, 2011 <sup>48</sup> | Berard, 2017 <sup>49</sup> | Bhupathiraju, 2013 <sup>50</sup> | Bingham, 2008 <sup>51</sup> | Blekkendorst, 2017 <sup>52</sup> |
|-------------------------------------------------------|------------------------------|-----------------------------|----------------------------|-------------------------------|-----------------------------|---------------------------|--------------------------------|----------------------------|----------------------------------|-----------------------------|----------------------------------|
| <b>No. of variables fully adjusted model</b>          | 13                           | 3                           | 8                          | 2                             | 10                          | 10                        | 12                             | 5                          | 13                               | 9                           | 10                               |
| <b>No. of multivariable models presented</b>          | 1                            | 1                           | 2                          | 2                             | 2                           | 1                         | 2                              | 1                          | 2                                | 1                           | 8                                |
| <b>Timing of measurement of confounding variables</b> | BL                           | BL                          | BL                         | BL                            | BL, 1982-84, 86, 87, 92     | BL                        | BL                             | BL                         | 1984-86, q2y                     | BL                          | BL                               |
| <b>Pre-specified primary confounding variables</b>    |                              |                             |                            |                               |                             |                           |                                |                            |                                  |                             |                                  |
| Age                                                   | ✓                            | ✓                           | ✓                          |                               | ✓                           | ✓                         | ✓                              | ✓                          | ✓                                | ✓                           | ✓                                |
| <b>Pre-specified secondary confounding variables</b>  |                              |                             |                            |                               |                             |                           |                                |                            |                                  |                             |                                  |
| Sex                                                   |                              | ✓                           | ✓                          |                               | ✓                           |                           | ✓                              | ✓                          |                                  | ✓                           | N/A                              |
| Smoking                                               | ✓                            | ✓                           | ✓                          |                               | ✓                           | ✓                         | ✓                              |                            | ✓                                | ✓                           | ✓                                |
| BMI                                                   | ✓                            |                             | ✓                          |                               |                             | ✓                         |                                |                            | ✓                                |                             | ✓                                |
| Physical activity                                     | ✓                            |                             | ✓                          |                               | ✓                           | ✓                         | ✓                              |                            | ✓                                | ✓                           | ✓                                |
| Alcohol                                               | ✓                            |                             |                            |                               | ✓                           |                           | ✓                              |                            | ✓                                | ✓                           | ✓                                |
| Blood pressure                                        | ✓                            |                             |                            |                               |                             | ✓                         | ✓                              |                            | ✓                                | ✓                           |                                  |
| Energy                                                | ✓                            |                             | ✓                          |                               | ✓                           | ✓                         | ✓                              | ✓                          | ✓                                | ✓                           |                                  |
| Diabetes                                              |                              |                             |                            |                               | ✓                           | ✓                         | ✓                              |                            |                                  |                             | ✓                                |
| Cholesterol                                           |                              |                             |                            |                               |                             | ✓                         | ✓                              |                            |                                  | ✓                           | ✓                                |
| <b>Other Confounding variables</b>                    |                              |                             |                            |                               |                             |                           |                                |                            |                                  |                             |                                  |
| Education                                             | ✓                            |                             |                            |                               | ✓                           | ✓                         | ✓                              | ✓                          |                                  |                             |                                  |
| Socioeconomic status                                  |                              |                             | ✓                          |                               |                             |                           |                                |                            |                                  |                             | ✓                                |
| Menopause and/or hormone Use                          | ✓                            |                             |                            |                               |                             |                           | ✓                              |                            | ✓                                |                             |                                  |
| Region/location                                       |                              |                             |                            |                               |                             |                           |                                |                            |                                  |                             |                                  |
| Randomization treatment                               |                              |                             |                            |                               |                             |                           |                                |                            |                                  |                             | ✓                                |
| Ethnicity/nationality                                 | ✓                            |                             |                            |                               | ✓                           | ✓                         |                                |                            |                                  |                             |                                  |
| Marital status                                        |                              |                             |                            |                               |                             |                           |                                |                            |                                  |                             |                                  |
| Study center                                          |                              |                             |                            |                               |                             |                           |                                | ✓                          |                                  |                             |                                  |
| Survey season                                         | ✓                            |                             |                            |                               |                             |                           |                                |                            |                                  |                             |                                  |
| Employment status                                     |                              |                             |                            |                               |                             |                           |                                |                            |                                  |                             |                                  |
| Follow-up duration                                    |                              |                             |                            |                               |                             |                           |                                |                            |                                  |                             |                                  |
| <b>Dietary Intake</b>                                 |                              |                             |                            |                               |                             |                           |                                |                            |                                  |                             |                                  |
| Vitamin/supplement                                    |                              |                             |                            |                               | ✓                           |                           |                                |                            | ✓                                |                             |                                  |
| Fruit and/or vegetable                                | ✓                            |                             |                            |                               |                             |                           |                                |                            |                                  |                             |                                  |
| Saturated fat                                         |                              |                             |                            |                               |                             |                           |                                |                            |                                  |                             |                                  |
| Whole grains                                          |                              |                             |                            |                               |                             |                           |                                |                            |                                  |                             |                                  |
| Fish/shellfish                                        |                              |                             |                            |                               |                             |                           |                                |                            | ✓                                |                             |                                  |
| Meat                                                  |                              |                             |                            |                               |                             |                           | ✓                              |                            |                                  |                             |                                  |
| Red meat                                              |                              |                             |                            |                               |                             |                           |                                |                            | ✓                                |                             |                                  |
| Dietary pattern score                                 |                              |                             | ✓                          | ✓                             |                             |                           |                                |                            |                                  |                             |                                  |
| Processed meat                                        |                              |                             |                            |                               |                             |                           |                                |                            |                                  |                             |                                  |
| Coffee                                                |                              |                             |                            |                               |                             |                           |                                |                            |                                  |                             |                                  |
| Fibre                                                 |                              |                             |                            |                               |                             |                           |                                |                            |                                  |                             |                                  |
| Folate                                                |                              |                             |                            |                               |                             |                           |                                |                            |                                  |                             |                                  |
| Sodium                                                |                              |                             |                            |                               |                             |                           |                                |                            |                                  |                             |                                  |
| Vitamin E                                             |                              |                             |                            |                               |                             |                           |                                |                            |                                  |                             |                                  |
| <b>Disease History</b>                                |                              |                             |                            |                               |                             |                           |                                |                            |                                  |                             |                                  |
| MI or family history of MI                            |                              |                             |                            |                               |                             |                           |                                |                            | ✓                                |                             |                                  |
| CHD or family history of CHD                          |                              |                             |                            |                               |                             |                           |                                |                            |                                  |                             |                                  |
| CVD or family history of CVD                          |                              |                             |                            | ✓                             |                             |                           |                                |                            |                                  |                             |                                  |
| <b>Medications</b>                                    |                              |                             |                            |                               |                             |                           |                                |                            |                                  |                             |                                  |
| ASA                                                   |                              |                             |                            |                               |                             |                           |                                |                            |                                  |                             | ✓                                |
| <b>Other confounding variables not listed:</b>        | Sleep, WC                    |                             |                            |                               |                             |                           |                                |                            | Cereal fibre, Trans fat          | Weight                      | GFR                              |

Table S2. Page 2/11

| Study                                                 | Bos, 2014 <sup>53</sup> | Buijsse, 2008 <sup>54</sup>         | BuilCosiales, 2016 <sup>56</sup> | BuilCosiales, 2017 <sup>55</sup> | Cassidy, 2012 <sup>57</sup> | Collin, 2019 <sup>58</sup> | Conrad, 2018 <sup>59</sup>                    | Dauchet, 2004 <sup>60</sup> | Dauchet, 2010 <sup>61</sup> | Du, 2016 <sup>62</sup>      |
|-------------------------------------------------------|-------------------------|-------------------------------------|----------------------------------|----------------------------------|-----------------------------|----------------------------|-----------------------------------------------|-----------------------------|-----------------------------|-----------------------------|
| <b>No. of variables fully adjusted model</b>          | 7                       | 15                                  | 17                               | 14                               | 13                          | 12                         | 10                                            | 10                          | 12                          | 13                          |
| <b>No. of multivariable models presented</b>          | 1                       | 4                                   | 1                                | 3                                | 1                           | 4                          | 1                                             | 1                           | 1                           | 2                           |
| <b>Timing of measurement of confounding variables</b> | BL                      | BL                                  | BL                               | 1999, q2y                        | 1976, q2y                   | BL                         | BL                                            | BL                          | BL                          | BL                          |
| <b>Pre-specified primary confounding variables</b>    |                         |                                     |                                  |                                  |                             |                            |                                               |                             |                             |                             |
| Age                                                   | ✓                       | ✓                                   | ✓                                | ✓                                | ✓                           | ✓                          | ✓                                             | ✓                           | ✓                           | ✓                           |
| <b>Pre-specified secondary confounding variables</b>  |                         |                                     |                                  |                                  |                             |                            |                                               |                             |                             |                             |
| Sex                                                   | ✓                       | ✓                                   | ✓                                | ✓                                | ✓                           | ✓                          | ✓                                             |                             |                             | ✓                           |
| Smoking                                               | ✓                       | ✓                                   | ✓                                | ✓                                | ✓                           | ✓                          | ✓                                             | ✓                           | ✓                           | ✓                           |
| BMI                                                   | ✓                       | ✓                                   | ✓                                | ✓                                | ✓                           | ✓                          | ✓                                             | ✓                           | ✓                           | ✓                           |
| Physical activity                                     |                         | ✓                                   | ✓                                | ✓                                | ✓                           | ✓                          |                                               | ✓                           | ✓                           | ✓                           |
| Alcohol                                               |                         | ✓                                   | ✓                                | ✓                                | ✓                           | ✓                          |                                               |                             |                             | ✓                           |
| Blood pressure                                        | ✓                       |                                     | ✓                                | ✓                                | ✓                           |                            |                                               | ✓                           | ✓                           |                             |
| Energy                                                |                         | ✓                                   | ✓                                | ✓                                | ✓                           | ✓                          |                                               |                             |                             |                             |
| Diabetes                                              | ✓                       |                                     | ✓                                |                                  | ✓                           |                            |                                               | ✓                           | ✓                           |                             |
| Cholesterol                                           |                         |                                     |                                  |                                  | ✓                           |                            |                                               | ✓                           | ✓                           |                             |
| <b>Other Confounding variables</b>                    |                         |                                     |                                  |                                  |                             |                            |                                               |                             |                             |                             |
| Education                                             |                         |                                     | ✓                                | ✓                                |                             | ✓                          | ✓                                             | ✓                           | ✓                           | ✓                           |
| Socioeconomic status                                  |                         | ✓                                   |                                  |                                  |                             | ✓                          | ✓                                             |                             |                             | ✓                           |
| Menopause and/or hormone Use                          |                         |                                     |                                  |                                  | ✓                           |                            |                                               |                             |                             |                             |
| Region/location                                       |                         |                                     |                                  |                                  |                             | ✓                          |                                               |                             |                             | ✓                           |
| Randomization treatment                               |                         |                                     | ✓                                |                                  |                             |                            |                                               |                             |                             |                             |
| Ethnicity/nationality                                 |                         |                                     |                                  |                                  |                             |                            | ✓                                             |                             |                             |                             |
| Marital status                                        |                         |                                     |                                  | ✓                                |                             |                            |                                               |                             |                             |                             |
| Study center                                          |                         |                                     | ✓                                |                                  |                             |                            |                                               | ✓                           | ✓                           |                             |
| Survey season                                         |                         |                                     |                                  |                                  |                             |                            |                                               |                             |                             | ✓                           |
| Employment status                                     |                         |                                     |                                  |                                  |                             |                            |                                               | ✓                           | ✓                           |                             |
| Follow-up duration                                    |                         |                                     |                                  |                                  |                             |                            |                                               |                             |                             |                             |
| <b>Dietary Intake</b>                                 |                         |                                     |                                  |                                  |                             |                            |                                               |                             |                             |                             |
| Vitamin/supplement                                    |                         |                                     |                                  |                                  | ✓                           |                            |                                               |                             | ✓                           |                             |
| Fruit and/or vegetable                                |                         |                                     | ✓                                |                                  |                             |                            |                                               |                             |                             |                             |
| Saturated fat                                         |                         | ✓                                   |                                  |                                  |                             | ✓                          |                                               |                             |                             |                             |
| Whole grains                                          |                         |                                     | ✓                                | ✓                                |                             |                            |                                               |                             |                             |                             |
| Fish/shellfish                                        |                         |                                     |                                  |                                  |                             |                            |                                               |                             |                             |                             |
| Meat                                                  |                         |                                     |                                  |                                  |                             |                            |                                               |                             |                             | ✓                           |
| Red meat                                              |                         |                                     |                                  |                                  |                             |                            |                                               |                             |                             |                             |
| Dietary pattern score                                 |                         |                                     |                                  |                                  |                             |                            |                                               |                             |                             |                             |
| Processed meat                                        |                         |                                     |                                  |                                  |                             |                            |                                               |                             |                             |                             |
| Coffee                                                |                         |                                     |                                  |                                  |                             |                            |                                               |                             |                             |                             |
| Fibre                                                 |                         | ✓                                   |                                  |                                  |                             | ✓                          |                                               |                             |                             |                             |
| Folate                                                |                         | ✓                                   |                                  |                                  |                             |                            |                                               |                             |                             |                             |
| Sodium                                                |                         |                                     |                                  |                                  |                             |                            |                                               |                             |                             |                             |
| Vitamin E                                             |                         |                                     |                                  |                                  |                             |                            |                                               |                             |                             |                             |
| <b>Disease History</b>                                |                         |                                     |                                  |                                  |                             |                            |                                               |                             |                             |                             |
| MI or family history of MI                            |                         |                                     |                                  |                                  |                             |                            |                                               |                             |                             |                             |
| CHD or family history of CHD                          | ✓                       |                                     | ✓                                | ✓                                |                             |                            |                                               |                             |                             |                             |
| CVD or family history of CVD                          |                         |                                     |                                  |                                  |                             |                            |                                               |                             |                             |                             |
| <b>Medications</b>                                    |                         |                                     |                                  |                                  |                             |                            |                                               |                             |                             |                             |
| ASA                                                   |                         |                                     |                                  |                                  | ✓                           |                            |                                               |                             |                             |                             |
| <b>Other confounding variables not listed:</b>        |                         | Vitamin C, trans/PUFA, α-tocopherol | Olive oil, Statins               | Dyslipidemia, Legumes, Olive oil |                             |                            | Cardiometabolic meds, added sugar, SFA:M/PUFA |                             | Dyslipidemi                 | Dairy, Preserved vegetables |

**Table S2. Page 3/11**

| Study                                                 | Du, 2017 <sup>63</sup> | Elwood, 2013 <sup>64</sup> | Eriksen, 2015 <sup>65</sup> | Fitzgerald, 2012 <sup>66</sup> | Fraser, 1992 <sup>67</sup> | Gardener, 2011 <sup>68</sup> | Gaziano, 1995 <sup>69</sup> | Genkinger, 2004 <sup>70</sup> | Gillman, 1995 <sup>71</sup> | Goetz, 2016 <sup>72</sup>          | Goetz, 2016 <sup>73</sup> |
|-------------------------------------------------------|------------------------|----------------------------|-----------------------------|--------------------------------|----------------------------|------------------------------|-----------------------------|-------------------------------|-----------------------------|------------------------------------|---------------------------|
| <b>No. of variables fully adjusted model</b>          | 12                     | 3                          | 9                           | 10                             | 6                          | 7                            | 6                           | 6                             | 7                           | 12                                 | 10                        |
| <b>No. of multivariable models presented</b>          | 14                     | 1                          | 1                           | 1                              | 1                          | 1                            | 1                           | 2                             | 1                           | 1                                  | 1                         |
| <b>Timing of measurement of confounding variables</b> | BL                     | 1979, q5y                  | BL                          | BL                             | BL                         | qy.                          | 1976, qy                    | BL                            | BL                          | BL                                 | BL                        |
| <b>Pre-specified primary confounding variables</b>    |                        |                            |                             |                                |                            |                              |                             |                               |                             |                                    |                           |
| Age                                                   | ✓                      | ✓                          | ✓                           | ✓                              | ✓                          | ✓                            | ✓                           | ✓                             | ✓                           | ✓                                  | ✓                         |
| <b>Pre-specified secondary confounding variables</b>  |                        |                            |                             |                                |                            |                              |                             |                               |                             |                                    |                           |
| Sex                                                   | ✓                      | ✓                          | ✓                           | ✓                              | ✓                          | ✓                            | ✓                           | ✓                             | ✓                           | ✓                                  | ✓                         |
| Smoking                                               | ✓                      |                            | ✓                           | ✓                              | ✓                          | ✓                            | ✓                           | ✓                             | ✓                           | ✓                                  | ✓                         |
| BMI                                                   | ✓                      |                            | ✓                           |                                |                            |                              |                             | ✓                             | ✓                           |                                    |                           |
| Physical activity                                     | ✓                      |                            |                             | ✓                              | ✓                          | ✓                            |                             |                               | ✓                           | ✓                                  | ✓                         |
| Alcohol                                               | ✓                      |                            | ✓                           | ✓                              |                            |                              |                             |                               |                             | ✓                                  |                           |
| Blood pressure                                        |                        |                            | ✓                           |                                |                            |                              |                             |                               |                             |                                    |                           |
| Energy                                                |                        |                            |                             | ✓                              | ✓                          | ✓                            |                             | ✓                             |                             | ✓                                  | ✓                         |
| Diabetes                                              |                        |                            |                             | ✓                              |                            |                              | ✓                           |                               | ✓                           |                                    |                           |
| Cholesterol                                           |                        |                            | ✓                           |                                |                            |                              | ✓                           | ✓                             | ✓                           |                                    |                           |
| <b>Other Confounding variables</b>                    |                        |                            |                             |                                |                            |                              |                             |                               |                             |                                    |                           |
| Education                                             | ✓                      |                            |                             | ✓                              |                            | ✓                            |                             |                               |                             | ✓                                  | ✓                         |
| Socioeconomic status                                  | ✓                      | ✓                          | ✓                           |                                |                            |                              |                             |                               |                             | ✓                                  | ✓                         |
| Menopause and/or hormone Use                          |                        |                            |                             | ✓                              |                            |                              |                             |                               |                             |                                    |                           |
| Region/location                                       | ✓                      |                            |                             |                                |                            |                              |                             |                               |                             | ✓                                  | ✓                         |
| Randomization treatment                               |                        |                            |                             | ✓                              |                            |                              |                             |                               |                             |                                    |                           |
| Ethnicity/nationality                                 |                        |                            |                             |                                |                            | ✓                            |                             |                               |                             |                                    | ✓                         |
| Marital status                                        |                        |                            |                             |                                |                            |                              |                             |                               |                             |                                    |                           |
| Study center                                          |                        |                            |                             |                                |                            |                              |                             |                               |                             |                                    |                           |
| Survey season                                         | ✓                      |                            |                             |                                |                            |                              |                             |                               |                             |                                    |                           |
| Employment status                                     |                        |                            | ✓                           |                                |                            |                              |                             |                               |                             |                                    |                           |
| Follow-up duration                                    |                        |                            |                             |                                |                            |                              |                             |                               |                             |                                    |                           |
| <b>Dietary Intake</b>                                 |                        |                            |                             |                                |                            |                              |                             |                               |                             |                                    |                           |
| Vitamin/supplement                                    |                        |                            |                             |                                |                            |                              |                             |                               |                             |                                    |                           |
| Fruit and/or vegetable                                |                        |                            |                             |                                |                            |                              |                             |                               |                             |                                    |                           |
| Saturated fat                                         |                        |                            |                             |                                |                            |                              |                             |                               |                             |                                    |                           |
| Whole grains                                          |                        |                            |                             |                                |                            |                              |                             |                               |                             |                                    |                           |
| Fish/shellfish                                        |                        |                            |                             |                                |                            |                              |                             |                               |                             |                                    |                           |
| Meat                                                  | ✓                      |                            |                             |                                |                            |                              |                             |                               |                             |                                    |                           |
| Red meat                                              |                        |                            |                             |                                |                            |                              |                             |                               |                             |                                    |                           |
| Dietary pattern score                                 |                        |                            |                             |                                |                            |                              |                             |                               |                             |                                    | ✓                         |
| Processed meat                                        |                        |                            |                             |                                |                            |                              |                             |                               |                             |                                    |                           |
| Coffee                                                |                        |                            |                             |                                |                            |                              |                             |                               |                             |                                    |                           |
| Fibre                                                 |                        |                            |                             |                                |                            |                              |                             |                               |                             |                                    |                           |
| Folate                                                |                        |                            |                             |                                |                            |                              |                             |                               |                             |                                    |                           |
| Sodium                                                |                        |                            |                             |                                |                            |                              |                             |                               |                             |                                    |                           |
| Vitamin E                                             |                        |                            |                             |                                |                            |                              |                             |                               |                             |                                    |                           |
| <b>Disease History</b>                                |                        |                            |                             |                                |                            |                              |                             |                               |                             |                                    |                           |
| MI or family history of MI                            |                        |                            |                             |                                |                            |                              |                             |                               |                             |                                    |                           |
| CHD or family history of CHD                          |                        |                            |                             |                                |                            |                              |                             |                               |                             |                                    |                           |
| CVD or family history of CVD                          |                        |                            |                             |                                |                            |                              |                             |                               |                             |                                    |                           |
| <b>Medications</b>                                    |                        |                            |                             |                                |                            |                              |                             |                               |                             |                                    |                           |
| ASA                                                   |                        |                            |                             |                                |                            |                              |                             |                               |                             |                                    |                           |
| <b>Other confounding variables not listed:</b>        | Preserved vegetables   |                            |                             |                                | Weight                     |                              | Functional status           |                               |                             | Trans FA<br>MUFA:SFA,<br>%E sweets |                           |

**Table S2. Page 4/11**

| Study                                                 | Gunge, 2017 <sup>74</sup> | Gunnell, 2013 <sup>75</sup>        | Hansen, 2010 <sup>77</sup> | Hansen, 2017 <sup>76</sup> | Harriss, 2007 <sup>78</sup> | Hertog, 1997 <sup>79</sup>         | Hirvonen, 2000 <sup>81</sup> | Hirvonen, 2001 <sup>80</sup> | Hjartaker, 2015 <sup>82</sup> | Hodgson, 2016 <sup>83</sup> | Holmberg, 2009 <sup>84</sup> |
|-------------------------------------------------------|---------------------------|------------------------------------|----------------------------|----------------------------|-----------------------------|------------------------------------|------------------------------|------------------------------|-------------------------------|-----------------------------|------------------------------|
| <b>No. of variables fully adjusted model</b>          | 18                        | 10                                 | 11                         | 13                         | 15                          | 13                                 | 10                           | 11                           | 9                             | 15                          | 0                            |
| <b>No. of multivariable models presented</b>          | 4                         | 1                                  | 2                          | 2                          | 2                           | 1                                  | 1                            | 1                            | 1                             | 2                           | 0                            |
| <b>Timing of measurement of confounding variables</b> | BL                        | BL                                 | BL                         | BL                         | BL                          | BL, q5y                            | BL                           | BL                           | BL                            | BL                          | BL                           |
| <b>Pre-specified primary confounding variables</b>    |                           |                                    |                            |                            |                             |                                    |                              |                              |                               |                             |                              |
| Age                                                   | ✓                         | ✓                                  | ✓                          | ✓                          | ✓                           | ✓                                  | ✓                            | ✓                            | ✓                             | ✓                           |                              |
| <b>Pre-specified secondary confounding variables</b>  |                           |                                    |                            |                            |                             |                                    |                              |                              |                               |                             |                              |
| Sex                                                   | ✓                         | ✓                                  | ✓                          | ✓                          | ✓                           |                                    |                              |                              | ✓                             | ✓                           |                              |
| Smoking                                               | ✓                         | ✓                                  | ✓                          | ✓                          | ✓                           | ✓                                  | ✓                            | ✓                            | ✓                             | ✓                           |                              |
| BMI                                                   | ✓                         | ✓                                  | ✓                          | ✓                          | ✓                           | ✓                                  | ✓                            | ✓                            | ✓                             | ✓                           |                              |
| Physical activity                                     | ✓                         | ✓                                  | ✓                          | ✓                          | ✓                           | ✓                                  | ✓                            | ✓                            | ✓                             | ✓                           |                              |
| Alcohol                                               | ✓                         |                                    | ✓                          | ✓                          |                             | ✓                                  |                              |                              | ✓                             | ✓                           |                              |
| Blood pressure                                        | ✓                         | ✓                                  | ✓                          | ✓                          | ✓                           | ✓                                  | ✓                            | ✓                            |                               | ✓                           |                              |
| Energy                                                | ✓                         |                                    |                            | ✓                          | ✓                           | ✓                                  |                              |                              |                               | ✓                           |                              |
| Diabetes                                              |                           |                                    |                            | ✓                          | ✓                           |                                    | ✓                            | ✓                            |                               | ✓                           |                              |
| Cholesterol                                           | ✓                         | ✓                                  | ✓                          | ✓                          |                             | ✓                                  | ✓                            | ✓                            |                               | ✓                           |                              |
| <b>Other Confounding variables</b>                    |                           |                                    |                            |                            |                             |                                    |                              |                              |                               |                             |                              |
| Education                                             | ✓                         |                                    | ✓                          | ✓                          | ✓                           |                                    | ✓                            | ✓                            |                               |                             |                              |
| Socioeconomic status                                  |                           |                                    |                            |                            |                             | ✓                                  |                              |                              | ✓                             | ✓                           |                              |
| Menopause and/or hormone Use                          | ✓                         |                                    |                            |                            |                             |                                    |                              |                              |                               |                             |                              |
| Region/location                                       |                           |                                    |                            |                            | ✓                           |                                    |                              |                              |                               |                             |                              |
| Randomization treatment                               |                           |                                    |                            |                            |                             |                                    | ✓                            | ✓                            |                               | ✓                           |                              |
| Ethnicity/nationality                                 |                           |                                    |                            |                            | ✓                           |                                    |                              |                              |                               |                             |                              |
| Marital status                                        |                           |                                    |                            |                            |                             |                                    |                              | ✓                            |                               |                             |                              |
| Study center                                          |                           |                                    |                            |                            |                             |                                    |                              |                              |                               |                             |                              |
| Survey season                                         |                           | ✓                                  |                            | ✓                          |                             |                                    |                              |                              |                               |                             |                              |
| Employment status                                     |                           |                                    |                            |                            |                             |                                    |                              |                              |                               |                             |                              |
| Follow-up duration                                    | ✓                         |                                    |                            |                            |                             |                                    |                              |                              |                               |                             |                              |
| <b>Dietary Intake</b>                                 |                           |                                    |                            |                            |                             |                                    |                              |                              |                               |                             |                              |
| Vitamin/supplement                                    |                           |                                    |                            |                            |                             |                                    |                              |                              | ✓                             |                             |                              |
| Fruit and/or vegetable                                | ✓                         |                                    |                            |                            | ✓                           |                                    |                              |                              |                               |                             |                              |
| Saturated fat                                         |                           |                                    | ✓                          |                            |                             |                                    |                              |                              |                               |                             |                              |
| Whole grains                                          | ✓                         |                                    | ✓                          |                            |                             |                                    |                              |                              |                               |                             |                              |
| Fish/shellfish                                        | ✓                         |                                    |                            |                            |                             |                                    |                              |                              |                               |                             |                              |
| Meat                                                  |                           |                                    |                            |                            | ✓                           |                                    |                              |                              |                               |                             |                              |
| Red meat                                              | ✓                         |                                    |                            |                            |                             |                                    |                              |                              |                               |                             |                              |
| Dietary pattern score                                 |                           |                                    |                            |                            | ✓                           |                                    |                              |                              |                               |                             |                              |
| Processed meat                                        | ✓                         |                                    |                            |                            |                             |                                    |                              |                              |                               |                             |                              |
| Coffee                                                |                           |                                    |                            |                            |                             |                                    |                              |                              | ✓                             |                             |                              |
| Fibre                                                 |                           |                                    |                            |                            |                             |                                    |                              |                              |                               |                             |                              |
| Folate                                                |                           |                                    |                            |                            |                             |                                    |                              |                              |                               |                             |                              |
| Sodium                                                |                           |                                    |                            |                            |                             |                                    |                              |                              |                               |                             |                              |
| Vitamin E                                             |                           |                                    |                            |                            |                             | ✓                                  |                              |                              |                               |                             |                              |
| <b>Disease History</b>                                |                           |                                    |                            |                            |                             |                                    |                              |                              |                               |                             |                              |
| MI or family history of MI                            |                           |                                    |                            |                            |                             |                                    |                              |                              |                               |                             |                              |
| CHD or family history of CHD                          |                           |                                    |                            | ✓                          |                             | ✓                                  | ✓                            | ✓                            |                               |                             |                              |
| CVD or family history of CVD                          |                           |                                    |                            |                            | ✓                           |                                    |                              |                              |                               | ✓                           |                              |
| <b>Medications</b>                                    |                           |                                    |                            |                            |                             |                                    |                              |                              |                               |                             |                              |
| ASA                                                   |                           |                                    |                            |                            |                             |                                    |                              |                              |                               | ✓                           |                              |
| <b>Other confounding variables not listed:</b>        | WC                        | Charlson index, DM hospitalization |                            | Weight                     |                             | Vitamin C, B-carotene, Dietary fat |                              |                              |                               | Cancer                      |                              |

**Table S2. Page 5/11**

| Study                                                 | Iso, 2007 <sup>85</sup> | Jacques, 2015 <sup>86</sup> | Johnsen, 2003 <sup>87</sup> | Joshiyura, 1999 <sup>88</sup> | Joshiyura, 2009 <sup>89</sup> | Keli, 1996 <sup>90</sup> | Kim, 2013 <sup>91</sup> | Knekt, 1994 <sup>94</sup> | Knekt, 1996 <sup>93</sup> | Knekt, 2000 <sup>92</sup>         | Kobylecki, 2015 <sup>95</sup> |
|-------------------------------------------------------|-------------------------|-----------------------------|-----------------------------|-------------------------------|-------------------------------|--------------------------|-------------------------|---------------------------|---------------------------|-----------------------------------|-------------------------------|
| <b>No. of variables fully adjusted model</b>          | 3                       | 5                           | 13                          | 12                            | 14                            | 7                        | 0                       | 5                         | 6                         | 17                                | 12                            |
| <b>No. of multivariable models presented</b>          | 1                       | 2                           | 2                           | 1                             | 198-86, q2y                   | 1                        | 0                       | 2                         | 1                         | 1                                 | 3                             |
| <b>Timing of measurement of confounding variables</b> | BL                      | 1991, q3-4y                 | BL                          | 1980-6, q2y                   | 1980-6, q2y                   | 1960-73, 77, 85          | BL                      | BL                        | BL                        | BL                                | BL                            |
| <b>Pre-specified primary confounding variables</b>    |                         |                             |                             |                               |                               |                          |                         |                           |                           |                                   |                               |
| Age                                                   | ✓                       | ✓                           | ✓                           | ✓                             | ✓                             | ✓                        |                         | ✓                         | ✓                         | ✓                                 | ✓                             |
| <b>Pre-specified secondary confounding variables</b>  |                         |                             |                             |                               |                               |                          |                         |                           |                           |                                   |                               |
| Sex                                                   | ✓                       | ✓                           | ✓                           | ✓                             |                               |                          |                         |                           | ✓                         |                                   | ✓                             |
| Smoking                                               |                         | ✓                           | ✓                           | ✓                             | ✓                             | ✓                        |                         | ✓                         | ✓                         | ✓                                 | ✓                             |
| BMI                                                   |                         | ✓                           | ✓                           | ✓                             | ✓                             |                          |                         |                           | ✓                         | ✓                                 | ✓                             |
| Physical activity                                     |                         |                             | ✓                           | ✓                             | ✓                             |                          |                         |                           |                           |                                   | ✓                             |
| Alcohol                                               |                         |                             | ✓                           | ✓                             | ✓                             | ✓                        |                         |                           |                           |                                   | ✓                             |
| Blood pressure                                        |                         |                             | ✓                           | ✓                             | ✓                             | ✓                        |                         | ✓                         | ✓                         | ✓                                 | ✓                             |
| Energy                                                |                         | ✓                           | ✓                           | ✓                             | ✓                             | ✓                        |                         | ✓                         |                           | ✓                                 |                               |
| Diabetes                                              |                         |                             | ✓                           | ✓                             | ✓                             |                          |                         |                           |                           | ✓                                 |                               |
| Cholesterol                                           |                         |                             | ✓                           | ✓                             | ✓                             | ✓                        |                         | ✓                         | ✓                         | ✓                                 | ✓                             |
| <b>Other Confounding variables</b>                    |                         |                             |                             |                               |                               |                          |                         |                           |                           |                                   |                               |
| Education                                             |                         |                             | ✓                           |                               |                               |                          |                         |                           |                           |                                   |                               |
| Socioeconomic status                                  |                         |                             |                             |                               |                               |                          |                         |                           |                           |                                   | ✓                             |
| Menopause and/or hormone Use                          |                         |                             |                             | ✓                             | ✓                             |                          |                         |                           |                           |                                   |                               |
| Region/location                                       | ✓                       |                             |                             |                               |                               |                          |                         |                           |                           | ✓                                 |                               |
| Randomization treatment                               |                         |                             |                             |                               |                               |                          |                         |                           |                           |                                   |                               |
| Ethnicity/nationality                                 |                         |                             |                             |                               |                               |                          |                         |                           |                           |                                   |                               |
| Marital status                                        |                         |                             |                             |                               |                               |                          |                         |                           |                           |                                   |                               |
| Study center                                          |                         |                             |                             |                               |                               |                          |                         |                           |                           |                                   |                               |
| Survey season                                         |                         |                             |                             |                               |                               |                          |                         |                           |                           |                                   |                               |
| Employment status                                     |                         |                             |                             |                               |                               |                          |                         |                           |                           |                                   |                               |
| Follow-up duration                                    |                         |                             |                             |                               |                               |                          |                         |                           |                           |                                   |                               |
| <b>Dietary Intake</b>                                 |                         |                             |                             |                               |                               |                          |                         |                           |                           |                                   |                               |
| Vitamin/supplement                                    |                         |                             |                             | ✓                             | ✓                             |                          |                         |                           |                           |                                   | ✓                             |
| Fruit and/or vegetable                                |                         |                             |                             |                               |                               |                          |                         |                           |                           | ✓                                 |                               |
| Saturated fat                                         |                         |                             |                             |                               |                               |                          |                         |                           |                           |                                   |                               |
| Whole grains                                          |                         |                             |                             |                               | ✓                             |                          |                         |                           |                           |                                   |                               |
| Fish/shellfish                                        |                         |                             |                             |                               |                               | ✓                        |                         |                           |                           |                                   |                               |
| Meat                                                  |                         |                             |                             |                               |                               |                          |                         |                           |                           |                                   |                               |
| Red meat                                              |                         |                             | ✓                           |                               |                               |                          |                         |                           |                           |                                   |                               |
| Dietary pattern score                                 |                         |                             |                             |                               |                               |                          |                         |                           |                           |                                   |                               |
| Processed meat                                        |                         |                             |                             |                               |                               |                          |                         |                           |                           |                                   |                               |
| Coffee                                                |                         |                             |                             |                               |                               |                          |                         |                           |                           |                                   |                               |
| Fibre                                                 |                         |                             |                             |                               |                               |                          |                         |                           |                           | ✓                                 |                               |
| Folate                                                |                         |                             |                             |                               |                               |                          |                         |                           |                           |                                   |                               |
| Sodium                                                |                         |                             |                             |                               |                               |                          |                         |                           |                           |                                   |                               |
| Vitamin E                                             |                         |                             |                             |                               |                               |                          |                         |                           |                           | ✓                                 |                               |
| <b>Disease History</b>                                |                         |                             |                             |                               |                               |                          |                         |                           |                           |                                   |                               |
| MI or family history of MI                            |                         |                             |                             | ✓                             |                               |                          |                         |                           |                           |                                   |                               |
| CHD or family history of CHD                          |                         |                             |                             |                               | ✓                             |                          |                         |                           |                           |                                   |                               |
| CVD or family history of CVD                          |                         |                             |                             |                               |                               |                          |                         |                           |                           |                                   |                               |
| <b>Medications</b>                                    |                         |                             |                             |                               |                               |                          |                         |                           |                           |                                   |                               |
| ASA                                                   |                         |                             |                             |                               | ✓                             |                          |                         |                           |                           |                                   |                               |
| <b>Other confounding variables not listed:</b>        |                         |                             | Ω-3-FA                      |                               |                               |                          |                         |                           |                           | Occupation, Vit C/E, Querc P/MUFA | Maximal oxygen intake, CRP    |

**Table S2. Page 6/11**

| Study                                                 | Kondo, 2019 <sup>96</sup> | Kvaavik, 2010 <sup>97</sup> | Lai, 2015 <sup>98</sup> | Larsson, 2009 <sup>99</sup> | Larsson, 2013 <sup>100</sup> | Leenders, 2013 <sup>102</sup> | Leenders, 2014 <sup>101</sup> | Lin, 2007 <sup>103</sup> | Lin, 2017 <sup>104</sup> | Liu, 2000 <sup>106</sup> |
|-------------------------------------------------------|---------------------------|-----------------------------|-------------------------|-----------------------------|------------------------------|-------------------------------|-------------------------------|--------------------------|--------------------------|--------------------------|
| <b>No. of variables fully adjusted model</b>          | 7                         | 8                           | 8                       | 14                          | 16                           | 11                            | 11                            | 13                       | 6                        | 8                        |
| <b>No. of multivariable models presented</b>          | 1                         | 2                           | 2                       | 2                           | 2                            | 1                             | 1                             | 2                        | 1                        | 3                        |
| <b>Timing of measurement of confounding variables</b> | BL                        | BL                          | BL                      | BL                          | BL                           | BL                            | BL                            | 1990, q2y                | BL                       | BL                       |
| <b>Pre-specified primary confounding variables</b>    |                           |                             |                         |                             |                              |                               |                               |                          |                          |                          |
| Age                                                   | ✓                         | ✓                           | ✓                       | ✓                           | ✓                            | ✓                             | ✓                             | ✓                        | ✓                        | ✓                        |
| <b>Pre-specified secondary confounding variables</b>  |                           |                             |                         |                             |                              |                               |                               |                          |                          |                          |
| Sex                                                   | ✓                         | ✓                           | ✓                       | ✓                           | ✓                            | ✓                             | ✓                             |                          | ✓                        |                          |
| Smoking                                               | ✓                         |                             | ✓                       | ✓                           | ✓                            | ✓                             | ✓                             | ✓                        |                          |                          |
| BMI                                                   |                           | ✓                           | ✓                       | ✓                           | ✓                            | ✓                             | ✓                             | ✓                        | ✓                        |                          |
| Physical activity                                     |                           |                             | ✓                       | ✓                           | ✓                            | ✓                             | ✓                             | ✓                        |                          | ✓                        |
| Alcohol                                               | ✓                         |                             | ✓                       | ✓                           | ✓                            | ✓                             | ✓                             | ✓                        |                          | ✓                        |
| Blood pressure                                        |                           | ✓                           |                         | ✓                           | ✓                            |                               |                               | ✓                        | ✓                        | ✓                        |
| Energy                                                | ✓                         |                             |                         | ✓                           | ✓                            |                               |                               | ✓                        |                          |                          |
| Diabetes                                              |                           | ✓                           |                         | ✓                           | ✓                            | ✓                             | ✓                             | ✓                        | ✓                        | ✓                        |
| Cholesterol                                           |                           |                             |                         | ✓                           |                              |                               |                               | ✓                        |                          | ✓                        |
| <b>Other Confounding variables</b>                    |                           |                             |                         |                             |                              |                               |                               |                          |                          |                          |
| Education                                             |                           |                             |                         |                             | ✓                            | ✓                             | ✓                             |                          | ✓                        |                          |
| Socioeconomic status                                  |                           | ✓                           | ✓                       |                             |                              |                               |                               |                          |                          |                          |
| Menopause and/or hormone Use                          |                           |                             |                         |                             |                              |                               |                               | ✓                        |                          |                          |
| Region/location                                       |                           |                             |                         |                             |                              |                               |                               |                          |                          |                          |
| Randomization treatment                               |                           |                             |                         | ✓                           |                              |                               |                               |                          |                          | ✓                        |
| Ethnicity/nationality                                 |                           |                             |                         |                             |                              |                               |                               |                          |                          |                          |
| Marital status                                        |                           |                             |                         |                             |                              |                               |                               |                          |                          |                          |
| Study center                                          |                           |                             |                         |                             |                              | ✓                             | ✓                             |                          |                          |                          |
| Survey season                                         |                           |                             |                         |                             |                              |                               |                               |                          |                          |                          |
| Employment status                                     |                           |                             |                         |                             |                              |                               |                               |                          |                          |                          |
| Follow-up duration                                    |                           |                             |                         |                             |                              |                               |                               |                          |                          |                          |
| <b>Dietary Intake</b>                                 |                           |                             |                         |                             |                              |                               |                               |                          |                          |                          |
| Vitamin/supplement                                    |                           |                             |                         |                             |                              |                               |                               | ✓                        |                          | ✓                        |
| Fruit and/or vegetable                                | ✓                         |                             | ✓                       |                             | ✓                            | ✓                             | ✓                             |                          |                          |                          |
| Saturated fat                                         |                           |                             |                         |                             |                              |                               |                               |                          |                          |                          |
| Whole grains                                          |                           |                             |                         |                             |                              |                               |                               |                          |                          |                          |
| Fish/shellfish                                        | ✓                         |                             |                         |                             |                              |                               |                               |                          |                          |                          |
| Meat                                                  |                           |                             |                         |                             |                              | ✓                             | ✓                             |                          |                          |                          |
| Red meat                                              |                           |                             |                         |                             | ✓                            |                               |                               |                          |                          |                          |
| Dietary pattern score                                 |                           |                             |                         |                             |                              |                               |                               |                          |                          |                          |
| Processed meat                                        |                           |                             |                         |                             | ✓                            |                               |                               |                          |                          |                          |
| Coffee                                                |                           |                             |                         |                             | ✓                            |                               |                               |                          |                          |                          |
| Fibre                                                 |                           |                             |                         |                             |                              |                               |                               |                          |                          |                          |
| Folate                                                |                           |                             |                         | ✓                           |                              |                               |                               |                          |                          |                          |
| Sodium                                                | ✓                         |                             |                         |                             |                              |                               |                               |                          |                          |                          |
| Vitamin E                                             |                           |                             |                         |                             |                              |                               |                               | ✓                        |                          |                          |
| <b>Disease History</b>                                |                           |                             |                         |                             |                              |                               |                               |                          |                          |                          |
| MI or family history of MI                            |                           |                             |                         |                             | ✓                            |                               |                               |                          |                          |                          |
| CHD or family history of CHD                          |                           | ✓                           |                         |                             |                              |                               |                               |                          |                          |                          |
| CVD or family history of CVD                          |                           |                             |                         | ✓                           |                              |                               |                               |                          | ✓                        |                          |
| <b>Medications</b>                                    |                           |                             |                         |                             |                              |                               |                               |                          |                          |                          |
| ASA                                                   |                           |                             |                         |                             | ✓                            |                               |                               | ✓                        |                          |                          |
| <b>Other confounding variables not listed:</b>        |                           | Respiratory diseases        |                         | Magnesium                   |                              |                               |                               |                          |                          |                          |



**Table S2. Page 7/11**

| Study                                                 | Liu, 2001 <sup>105</sup> | Mann, 1997 <sup>107</sup> | Manuel, 2015 <sup>108</sup> | Miller, 2017 <sup>109</sup>  | Mink, 2007 <sup>110</sup> | Mizrahi, 2009 <sup>111</sup> | Mori, 2018 <sup>112</sup> | Mytton, 2018 <sup>113</sup>   | Nagura, 2009 <sup>114</sup>             | Nakamura, 2008 <sup>115</sup> |
|-------------------------------------------------------|--------------------------|---------------------------|-----------------------------|------------------------------|---------------------------|------------------------------|---------------------------|-------------------------------|-----------------------------------------|-------------------------------|
| <b>No. of variables fully adjusted model</b>          | 11                       | 5                         | 1                           | 17                           | 11                        | 8                            | 16                        | 16                            | 16                                      | 15                            |
| <b>No. of multivariable models presented</b>          | 2                        | 1                         | 1                           | 1                            | 2                         | 1                            | 3                         | 2                             | 3                                       | 3                             |
| <b>Timing of measurement of confounding variables</b> | BL                       | BL                        | BL                          | BL                           | BL                        | BL                           | BL                        | BL                            | BL                                      | BL                            |
| <b>Pre-specified primary confounding variables</b>    |                          |                           |                             |                              |                           |                              |                           |                               |                                         |                               |
| Age                                                   | ✓                        | ✓                         | ✓                           | ✓                            | ✓                         | ✓                            | ✓                         | ✓                             | ✓                                       | ✓                             |
| <b>Pre-specified secondary confounding variables</b>  |                          |                           |                             |                              |                           |                              |                           |                               |                                         |                               |
| Sex                                                   | ✓                        | ✓                         |                             | ✓                            |                           | ✓                            | ✓                         | ✓                             | ✓                                       | ✓                             |
| Smoking                                               | ✓                        | ✓                         |                             | ✓                            | ✓                         | ✓                            | ✓                         | ✓                             | ✓                                       | ✓                             |
| BMI                                                   | ✓                        | ✓                         |                             |                              | ✓                         | ✓                            | ✓                         | ✓                             | ✓                                       | ✓                             |
| Physical activity                                     | ✓                        |                           |                             | ✓                            | ✓                         | ✓                            | ✓                         | ✓                             | ✓                                       | ✓                             |
| Alcohol                                               | ✓                        |                           |                             |                              |                           |                              | ✓                         | ✓                             | ✓                                       | ✓                             |
| Blood pressure                                        | ✓                        |                           |                             | ✓                            | ✓                         | ✓                            | ✓                         | ✓                             | ✓                                       | ✓                             |
| Energy                                                |                          |                           |                             | ✓                            | ✓                         | ✓                            | ✓                         | ✓                             |                                         | ✓                             |
| Diabetes                                              | ✓                        |                           |                             | ✓                            | ✓                         |                              | ✓                         | ✓                             | ✓                                       | ✓                             |
| Cholesterol                                           | ✓                        |                           |                             | ✓                            |                           | ✓                            |                           | ✓                             |                                         |                               |
| <b>Other Confounding variables</b>                    |                          |                           |                             |                              |                           |                              |                           |                               |                                         |                               |
| Education                                             |                          |                           |                             | ✓                            | ✓                         |                              |                           | ✓                             | ✓                                       | ✓                             |
| Socioeconomic status                                  |                          | ✓                         |                             |                              |                           |                              |                           |                               |                                         |                               |
| Menopause and/or hormone Use                          |                          |                           |                             |                              | ✓                         |                              |                           |                               |                                         | ✓                             |
| Region/location                                       |                          |                           |                             | ✓                            |                           |                              |                           |                               |                                         |                               |
| Randomization treatment                               | ✓                        |                           |                             |                              |                           |                              |                           |                               |                                         |                               |
| Ethnicity/nationality                                 |                          |                           |                             |                              |                           |                              |                           |                               |                                         |                               |
| Marital status                                        |                          |                           |                             |                              | ✓                         |                              |                           |                               |                                         | ✓                             |
| Study center                                          |                          |                           |                             | ✓                            |                           |                              | ✓                         |                               |                                         |                               |
| Survey season                                         |                          |                           |                             |                              |                           |                              | ✓                         |                               |                                         |                               |
| Employment status                                     |                          |                           |                             |                              |                           |                              | ✓                         |                               |                                         |                               |
| Follow-up duration                                    |                          |                           |                             |                              |                           |                              |                           |                               |                                         |                               |
| <b>Dietary Intake</b>                                 |                          |                           |                             |                              |                           |                              |                           |                               |                                         |                               |
| Vitamin/supplement                                    | ✓                        |                           |                             |                              |                           |                              | ✓                         |                               |                                         |                               |
| Fruit and/or vegetable                                |                          |                           |                             | ✓                            |                           |                              | ✓                         |                               | ✓                                       |                               |
| Saturated fat                                         |                          |                           |                             |                              |                           |                              |                           |                               | ✓                                       | ✓                             |
| Whole grains                                          |                          |                           |                             |                              |                           |                              |                           |                               |                                         |                               |
| Fish/shellfish                                        |                          |                           |                             |                              |                           |                              |                           |                               |                                         |                               |
| Meat                                                  |                          |                           |                             |                              |                           |                              |                           |                               |                                         |                               |
| Red meat                                              |                          |                           |                             | ✓                            |                           |                              |                           |                               |                                         |                               |
| Dietary pattern score                                 |                          |                           |                             |                              |                           |                              |                           |                               |                                         |                               |
| Processed meat                                        |                          |                           |                             |                              |                           |                              |                           |                               |                                         |                               |
| Coffee                                                |                          |                           |                             |                              |                           |                              | ✓                         |                               |                                         |                               |
| Fibre                                                 |                          |                           |                             | ✓                            |                           |                              |                           |                               |                                         |                               |
| Folate                                                |                          |                           |                             |                              |                           |                              |                           |                               |                                         |                               |
| Sodium                                                |                          |                           |                             |                              |                           |                              | ✓                         |                               | ✓                                       | ✓                             |
| Vitamin E                                             |                          |                           |                             |                              |                           |                              |                           |                               |                                         |                               |
| <b>Disease History</b>                                |                          |                           |                             |                              |                           |                              |                           |                               |                                         |                               |
| MI or family history of MI                            |                          |                           |                             |                              |                           |                              |                           | ✓                             |                                         |                               |
| CHD or family history of CHD                          |                          |                           |                             |                              |                           |                              |                           |                               |                                         |                               |
| CVD or family history of CVD                          |                          |                           |                             |                              |                           |                              |                           |                               |                                         |                               |
| <b>Medications</b>                                    |                          |                           |                             |                              |                           |                              |                           |                               |                                         |                               |
| ASA                                                   |                          |                           |                             |                              |                           |                              |                           |                               |                                         |                               |
| <b>Other confounding variables not listed:</b>        |                          |                           |                             | Waist:hip, bread, white meat | Waist:hip                 |                              | Green tea                 | Family hx of diabetes/ stroke | Sleep, stress, Ω-3 FA, diet cholesterol | Dietary protein               |

Table S2. Page 8/11

| Study                                                 | Nechuta, 2010 <sup>116</sup> | Neelakantan, 2018 <sup>117</sup> | Ness, 2005 <sup>118</sup>        | Nothlings, 2008 <sup>119</sup>   | Okuda, 2015 <sup>120</sup> | Oude Griep, 2010 <sup>121</sup> | Oude Griep, 2011 <sup>123</sup> | Oude Griep, 2011 <sup>122</sup> | Oyebode, 2014 <sup>124</sup> | Pham, 2007 <sup>125</sup> |
|-------------------------------------------------------|------------------------------|----------------------------------|----------------------------------|----------------------------------|----------------------------|---------------------------------|---------------------------------|---------------------------------|------------------------------|---------------------------|
| <b>No. of variables fully adjusted model</b>          | 7                            | 12                               | 8                                | 11                               | 11                         | 12                              | 15                              | 15                              | 8                            | 9                         |
| <b>No. of multivariable models presented</b>          | 2                            | 1                                | 2                                | 2                                | 3                          | 3                               | 3                               | 3                               | 2                            | 1                         |
| <b>Timing of measurement of confounding variables</b> | BL                           | BL                               | BL                               | BL                               | BL                         | BL                              | BL                              | BL                              | 2001, qy                     | BL                        |
| <b>Pre-specified primary confounding variables</b>    |                              |                                  |                                  |                                  |                            |                                 |                                 |                                 |                              |                           |
| Age                                                   | ✓                            | ✓                                | ✓                                | ✓                                | ✓                          | ✓                               | ✓                               | ✓                               | ✓                            | ✓                         |
| <b>Pre-specified secondary confounding variables</b>  |                              |                                  |                                  |                                  |                            |                                 |                                 |                                 |                              |                           |
| Sex                                                   | ✓                            | ✓                                | ✓                                | ✓                                | ✓                          | ✓                               | ✓                               | ✓                               | ✓                            | ✓                         |
| Smoking                                               |                              | ✓                                |                                  | ✓                                | ✓                          | ✓                               | ✓                               | ✓                               | ✓                            | ✓                         |
| BMI                                                   | ✓                            | ✓                                |                                  |                                  | ✓                          |                                 | ✓                               | ✓                               | ✓                            | ✓                         |
| Physical activity                                     | ✓                            | ✓                                |                                  |                                  |                            |                                 |                                 |                                 | ✓                            |                           |
| Alcohol                                               |                              |                                  |                                  | ✓                                | ✓                          | ✓                               | ✓                               | ✓                               | ✓                            | ✓                         |
| Blood pressure                                        |                              | ✓                                |                                  | ✓                                |                            |                                 |                                 |                                 |                              | ✓                         |
| Energy                                                |                              | ✓                                | ✓                                | ✓                                | ✓                          | ✓                               | ✓                               | ✓                               |                              |                           |
| Diabetes                                              |                              | ✓                                |                                  | ✓                                |                            |                                 | ✓                               | ✓                               |                              | ✓                         |
| Cholesterol                                           |                              |                                  |                                  |                                  |                            |                                 | ✓                               | ✓                               |                              |                           |
| <b>Other Confounding variables</b>                    |                              |                                  |                                  |                                  |                            |                                 |                                 |                                 |                              |                           |
| Education                                             | ✓                            | ✓                                |                                  |                                  |                            | ✓                               | ✓                               | ✓                               | ✓                            |                           |
| Socioeconomic status                                  | ✓                            |                                  | ✓                                |                                  |                            |                                 |                                 |                                 | ✓                            |                           |
| Menopause and/or hormone Use                          |                              |                                  |                                  |                                  |                            | ✓                               | ✓                               | ✓                               |                              |                           |
| Region/location                                       |                              |                                  | ✓                                |                                  |                            |                                 |                                 |                                 |                              |                           |
| Randomization treatment                               |                              |                                  |                                  |                                  |                            |                                 |                                 |                                 |                              |                           |
| Ethnicity/nationality                                 |                              | ✓                                |                                  |                                  |                            |                                 |                                 |                                 |                              |                           |
| Marital status                                        | ✓                            |                                  |                                  |                                  |                            |                                 |                                 |                                 |                              |                           |
| Study center                                          |                              |                                  |                                  |                                  |                            |                                 |                                 |                                 |                              |                           |
| Survey season                                         |                              |                                  | ✓                                |                                  |                            |                                 |                                 |                                 |                              |                           |
| Employment status                                     |                              |                                  |                                  |                                  |                            |                                 |                                 |                                 |                              |                           |
| Follow-up duration                                    |                              |                                  |                                  |                                  |                            |                                 |                                 |                                 |                              |                           |
| <b>Dietary Intake</b>                                 |                              |                                  |                                  |                                  |                            |                                 |                                 |                                 |                              |                           |
| Vitamin/supplement                                    |                              |                                  |                                  |                                  |                            | ✓                               | ✓                               | ✓                               |                              |                           |
| Fruit and/or vegetable                                |                              | ✓                                |                                  |                                  |                            |                                 |                                 |                                 |                              | ✓                         |
| Saturated fat                                         |                              |                                  |                                  |                                  |                            |                                 |                                 |                                 |                              |                           |
| Whole grains                                          |                              | ✓                                |                                  |                                  |                            | ✓                               | ✓                               | ✓                               |                              |                           |
| Fish/shellfish                                        |                              | ✓                                |                                  |                                  | ✓                          | ✓                               | ✓                               | ✓                               |                              |                           |
| Meat                                                  |                              |                                  |                                  |                                  | ✓                          |                                 |                                 |                                 |                              |                           |
| Red meat                                              |                              |                                  |                                  |                                  |                            |                                 |                                 |                                 |                              |                           |
| Dietary pattern score                                 |                              |                                  |                                  |                                  |                            |                                 |                                 |                                 |                              |                           |
| Processed meat                                        |                              |                                  |                                  |                                  |                            | ✓                               | ✓                               | ✓                               |                              |                           |
| Coffee                                                |                              |                                  |                                  |                                  |                            |                                 |                                 |                                 |                              |                           |
| Fibre                                                 |                              |                                  |                                  |                                  |                            |                                 |                                 |                                 |                              |                           |
| Folate                                                |                              |                                  |                                  |                                  |                            |                                 |                                 |                                 |                              |                           |
| Sodium                                                |                              |                                  |                                  |                                  | ✓                          |                                 |                                 |                                 |                              |                           |
| Vitamin E                                             |                              |                                  |                                  |                                  |                            |                                 |                                 |                                 |                              |                           |
| <b>Disease History</b>                                |                              |                                  |                                  |                                  |                            |                                 |                                 |                                 |                              |                           |
| MI or family history of MI                            |                              |                                  |                                  | ✓                                |                            | ✓                               | ✓                               | ✓                               |                              |                           |
| CHD or family history of CHD                          |                              |                                  |                                  |                                  |                            |                                 |                                 |                                 |                              |                           |
| CVD or family history of CVD                          |                              |                                  |                                  |                                  |                            |                                 |                                 |                                 |                              |                           |
| <b>Medications</b>                                    |                              |                                  |                                  |                                  |                            |                                 |                                 |                                 |                              |                           |
| ASA                                                   |                              |                                  |                                  |                                  |                            |                                 |                                 |                                 |                              |                           |
| <b>Other confounding variables not listed:</b>        |                              | Sleep, nuts, legumes, dairy      | Child food expenditure, Townsend | Cancer hx, insulin tx, Waist:Hip | Dairy, soy                 |                                 |                                 |                                 |                              | Blood transfusion         |

Table S2. Page 9/11

| Study                                                 | Rebello, 2014 <sup>126</sup>         | Rissanen, 2003 <sup>127</sup> | Saglimbene, 2017 <sup>128</sup> | Sahyoun, 1996 <sup>129</sup> | Sauvaget, 2003 <sup>130</sup>        | Scheffers, 2019 <sup>131</sup> | Sesso, 2003 <sup>132</sup> | Sesso, 2003 <sup>134</sup> | Sesso, 2007 <sup>133</sup>      | Shah, 2018 <sup>135</sup> | Sharma, 2013 <sup>136</sup> |
|-------------------------------------------------------|--------------------------------------|-------------------------------|---------------------------------|------------------------------|--------------------------------------|--------------------------------|----------------------------|----------------------------|---------------------------------|---------------------------|-----------------------------|
| <b>No. of variables fully adjusted model</b>          | 20                                   | 10                            | N/A                             | 4                            | 13                                   | 12                             | 16                         | 16                         | 18                              | 10                        | 7                           |
| <b>No. of multivariable models presented</b>          | 3                                    | 4                             | N/A                             | 3                            | 4                                    | 4                              | 2                          | 2                          | 4                               | 2                         | 1                           |
| <b>Timing of measurement of confounding variables</b> | BL                                   | BL                            | N/A                             | BL                           | BL                                   | BL                             | BL                         | BL                         | BL                              | BL                        | BL                          |
| <b>Pre-specified primary confounding variables</b>    |                                      |                               |                                 |                              |                                      |                                |                            |                            |                                 |                           |                             |
| Age                                                   | ✓                                    | ✓                             |                                 | ✓                            | ✓                                    | ✓                              | ✓                          | ✓                          | ✓                               | ✓                         |                             |
| <b>Pre-specified secondary confounding variables</b>  |                                      |                               |                                 |                              |                                      |                                |                            |                            |                                 |                           |                             |
| Sex                                                   |                                      | ✓                             |                                 | ✓                            | ✓                                    | ✓                              |                            |                            |                                 | ✓                         |                             |
| Smoking                                               | ✓                                    | ✓                             |                                 |                              | ✓                                    | ✓                              | ✓                          | ✓                          | ✓                               | ✓                         | ✓                           |
| BMI                                                   | ✓                                    | ✓                             |                                 |                              | ✓                                    | ✓                              | ✓                          | ✓                          | ✓                               | ✓                         |                             |
| Physical activity                                     | ✓                                    |                               |                                 |                              |                                      | ✓                              | ✓                          | ✓                          | ✓                               | ✓                         | ✓                           |
| Alcohol                                               | ✓                                    |                               |                                 |                              | ✓                                    | ✓                              | ✓                          | ✓                          | ✓                               | ✓                         | ✓                           |
| Blood pressure                                        | ✓                                    | ✓                             |                                 |                              | ✓                                    | ✓                              | ✓                          | ✓                          | ✓                               | ✓                         |                             |
| Energy                                                | ✓                                    |                               |                                 |                              |                                      |                                |                            | ✓                          | ✓                               |                           | ✓                           |
| Diabetes                                              |                                      | ✓                             |                                 |                              | ✓                                    |                                | ✓                          | ✓                          | ✓                               | ✓                         |                             |
| Cholesterol                                           |                                      | ✓                             |                                 |                              |                                      | ✓                              | ✓                          | ✓                          | ✓                               | ✓                         |                             |
| <b>Other Confounding variables</b>                    |                                      |                               |                                 |                              |                                      |                                |                            |                            |                                 |                           |                             |
| Education                                             | ✓                                    |                               |                                 |                              | ✓                                    | ✓                              |                            |                            |                                 |                           | ✓                           |
| Socioeconomic status                                  |                                      |                               |                                 |                              |                                      |                                |                            |                            |                                 |                           |                             |
| Menopause and/or hormone Use                          | ✓                                    |                               |                                 |                              |                                      |                                | ✓                          | ✓                          | ✓                               |                           |                             |
| Region/location                                       |                                      |                               |                                 |                              | ✓                                    |                                |                            |                            |                                 |                           |                             |
| Randomization treatment                               |                                      |                               |                                 |                              |                                      |                                | ✓                          | ✓                          | ✓                               |                           |                             |
| Ethnicity/nationality                                 | ✓                                    |                               |                                 |                              |                                      |                                |                            |                            |                                 |                           | ✓                           |
| Marital status                                        |                                      |                               |                                 |                              |                                      |                                |                            |                            |                                 |                           |                             |
| Study center                                          |                                      |                               |                                 |                              |                                      |                                |                            |                            |                                 |                           |                             |
| Survey season                                         | ✓                                    |                               |                                 |                              |                                      |                                |                            |                            |                                 |                           |                             |
| Employment status                                     |                                      |                               |                                 |                              |                                      |                                |                            |                            |                                 |                           |                             |
| Follow-up duration                                    |                                      | ✓                             |                                 |                              |                                      |                                |                            |                            |                                 |                           | ✓                           |
| <b>Dietary Intake</b>                                 |                                      |                               |                                 |                              |                                      |                                |                            |                            |                                 |                           |                             |
| Vitamin/supplement                                    |                                      | ✓                             |                                 |                              |                                      |                                |                            |                            |                                 |                           |                             |
| Fruit and/or vegetable                                |                                      |                               |                                 |                              |                                      |                                | ✓                          | ✓                          | ✓                               |                           |                             |
| Saturated fat                                         | ✓                                    |                               |                                 |                              |                                      |                                | ✓                          | ✓                          |                                 |                           |                             |
| Whole grains                                          |                                      |                               |                                 |                              |                                      |                                |                            |                            |                                 |                           |                             |
| Fish/shellfish                                        |                                      |                               |                                 |                              |                                      |                                |                            |                            |                                 |                           |                             |
| Meat                                                  |                                      |                               |                                 |                              |                                      |                                |                            |                            |                                 |                           |                             |
| Red meat                                              | ✓                                    |                               |                                 |                              |                                      |                                |                            |                            |                                 |                           |                             |
| Dietary pattern score                                 |                                      |                               |                                 |                              |                                      | ✓                              |                            |                            |                                 |                           |                             |
| Processed meat                                        |                                      |                               |                                 |                              |                                      |                                |                            |                            |                                 |                           |                             |
| Coffee                                                |                                      |                               |                                 |                              |                                      |                                |                            |                            |                                 |                           |                             |
| Fibre                                                 |                                      |                               |                                 |                              |                                      |                                | ✓                          | ✓                          | ✓                               |                           |                             |
| Folate                                                |                                      |                               |                                 |                              |                                      |                                | ✓                          | ✓                          | ✓                               |                           |                             |
| Sodium                                                |                                      |                               |                                 |                              |                                      |                                |                            |                            |                                 |                           |                             |
| Vitamin E                                             |                                      |                               |                                 |                              |                                      |                                | ✓                          |                            |                                 |                           |                             |
| <b>Disease History</b>                                |                                      |                               |                                 |                              |                                      |                                |                            |                            |                                 |                           |                             |
| MI or family history of MI                            |                                      |                               |                                 |                              | ✓                                    |                                | ✓                          | ✓                          | ✓                               |                           |                             |
| CHD or family history of CHD                          |                                      |                               |                                 |                              |                                      |                                |                            |                            |                                 |                           |                             |
| CVD or family history of CVD                          |                                      |                               |                                 |                              |                                      |                                |                            |                            |                                 | ✓                         |                             |
| <b>Medications</b>                                    |                                      |                               |                                 |                              |                                      |                                |                            |                            |                                 |                           |                             |
| ASA                                                   |                                      |                               |                                 |                              |                                      |                                |                            |                            |                                 |                           |                             |
| <b>Other confounding variables not listed:</b>        | Sleep, bread, legumes, soy egg, PUFA | Maximal oxygen                |                                 | Functional status, Health    | Birth cohort, animal prod, radiation |                                |                            |                            | Vitamin C, flavonoid, potassium |                           |                             |

**Table S2. Page 10/11**

| Study                                                 | Sharma, 2014 <sup>137</sup> | Simila, 2013 <sup>138</sup> | Sonestedt, 2015 <sup>139</sup> | Sotomayer, 2019 <sup>140</sup>                  | Steffen, 2003 <sup>141</sup> | Stefler, 2016 <sup>142</sup> | Strandhagen, 2000 <sup>143</sup> | Takachi, 2008 <sup>144</sup> | Tanaka, 2013 <sup>145</sup> | Tucker, 2005 <sup>147</sup> | Tognon, 2014 <sup>146</sup> |
|-------------------------------------------------------|-----------------------------|-----------------------------|--------------------------------|-------------------------------------------------|------------------------------|------------------------------|----------------------------------|------------------------------|-----------------------------|-----------------------------|-----------------------------|
| <b>No. of variables fully adjusted model</b>          | 5                           | 2                           | 14                             | 16                                              | 12                           | 12                           | 5                                | 11                           | 21                          | 10                          | 6                           |
| <b>No. of multivariable models presented</b>          | 1                           | 1                           | 3                              | 4                                               | 3                            | 1                            | 2                                | 2                            | 3                           | 3                           | 1                           |
| <b>Timing of measurement of confounding variables</b> | BL                          | BL                          | BL                             | BL                                              | BL                           | BL                           | BL                               | BL                           | BL                          | 1961, biennially            | BL                          |
| <b>Pre-specified primary confounding variables</b>    |                             |                             |                                |                                                 |                              |                              |                                  |                              |                             |                             |                             |
| Age                                                   |                             | ✓                           | ✓                              | ✓                                               | ✓                            | ✓                            | ✓                                | ✓                            | ✓                           | ✓                           | ✓                           |
| <b>Pre-specified secondary confounding variables</b>  |                             |                             |                                |                                                 |                              |                              |                                  |                              |                             |                             |                             |
| Sex                                                   |                             |                             | ✓                              | ✓                                               | ✓                            | ✓                            | ✓                                | ✓                            | ✓                           | ✓                           | ✓                           |
| Smoking                                               | ✓                           |                             | ✓                              | ✓                                               | ✓                            | ✓                            | ✓                                | ✓                            | ✓                           | ✓                           | ✓                           |
| BMI                                                   | ✓                           |                             | ✓                              | ✓                                               | ✓                            | ✓                            |                                  | ✓                            | ✓                           | ✓                           | ✓                           |
| Physical activity                                     | ✓                           |                             | ✓                              | ✓                                               | ✓                            | ✓                            |                                  | ✓                            | ✓                           | ✓                           | ✓                           |
| Alcohol                                               | ✓                           |                             | ✓                              | ✓                                               | ✓                            | ✓                            |                                  | ✓                            | ✓                           | ✓                           |                             |
| Blood pressure                                        |                             |                             |                                | ✓                                               | ✓                            |                              | ✓                                | ✓                            | ✓                           |                             |                             |
| Energy                                                |                             |                             | ✓                              |                                                 | ✓                            | ✓                            |                                  | ✓                            | ✓                           | ✓                           |                             |
| Diabetes                                              | ✓                           |                             |                                | ✓                                               |                              |                              |                                  | ✓                            | ✓                           |                             |                             |
| Cholesterol                                           |                             |                             |                                | ✓                                               | ✓                            |                              | ✓                                |                              | ✓                           |                             |                             |
| <b>Other Confounding variables</b>                    |                             |                             |                                |                                                 |                              |                              |                                  |                              |                             |                             |                             |
| Education                                             |                             |                             | ✓                              | ✓                                               | ✓                            | ✓                            |                                  |                              |                             |                             | ✓                           |
| Socioeconomic status                                  |                             |                             |                                | ✓                                               |                              |                              |                                  |                              |                             |                             |                             |
| Menopause and/or hormone Use                          |                             |                             |                                |                                                 |                              |                              |                                  |                              |                             |                             |                             |
| Region/location                                       |                             |                             |                                |                                                 |                              |                              |                                  |                              |                             |                             |                             |
| Randomization treatment                               |                             | ✓                           |                                |                                                 |                              |                              |                                  |                              |                             |                             |                             |
| Ethnicity/nationality                                 |                             |                             |                                |                                                 | ✓                            |                              |                                  |                              |                             |                             |                             |
| Marital status                                        |                             |                             |                                |                                                 |                              | ✓                            |                                  |                              |                             |                             |                             |
| Study center                                          |                             |                             |                                |                                                 |                              |                              |                                  | ✓                            |                             |                             |                             |
| Survey season                                         |                             |                             | ✓                              |                                                 |                              |                              |                                  |                              |                             |                             |                             |
| Employment status                                     |                             |                             |                                |                                                 |                              |                              |                                  |                              |                             |                             |                             |
| Follow-up duration                                    |                             |                             |                                | ✓                                               |                              |                              |                                  |                              |                             | ✓                           |                             |
| <b>Dietary Intake</b>                                 |                             |                             |                                |                                                 |                              |                              |                                  |                              |                             |                             |                             |
| Vitamin/supplement                                    |                             |                             |                                |                                                 |                              | ✓                            |                                  | ✓                            |                             | ✓                           |                             |
| Fruit and/or vegetable                                |                             |                             | ✓                              |                                                 |                              | ✓                            |                                  |                              |                             | ✓                           |                             |
| Saturated fat                                         |                             |                             |                                |                                                 |                              |                              |                                  |                              | ✓                           | ✓                           |                             |
| Whole grains                                          |                             |                             | ✓                              |                                                 |                              |                              |                                  |                              |                             |                             |                             |
| Fish/shellfish                                        |                             |                             |                                |                                                 |                              |                              |                                  |                              |                             |                             |                             |
| Meat                                                  |                             |                             | ✓                              |                                                 |                              |                              |                                  |                              |                             |                             |                             |
| Red meat                                              |                             |                             |                                |                                                 |                              |                              |                                  |                              |                             |                             |                             |
| Dietary pattern score                                 |                             |                             |                                |                                                 | ✓                            |                              |                                  |                              |                             |                             |                             |
| Processed meat                                        |                             |                             |                                |                                                 |                              |                              |                                  |                              |                             |                             |                             |
| Coffee                                                |                             |                             | ✓                              |                                                 |                              |                              |                                  |                              |                             |                             |                             |
| Fibre                                                 |                             |                             |                                |                                                 |                              |                              |                                  |                              |                             |                             |                             |
| Folate                                                |                             |                             |                                |                                                 |                              |                              |                                  |                              |                             |                             |                             |
| Sodium                                                |                             |                             |                                |                                                 |                              |                              |                                  |                              | ✓                           |                             |                             |
| Vitamin E                                             |                             |                             |                                |                                                 |                              |                              |                                  |                              |                             |                             |                             |
| <b>Disease History</b>                                |                             |                             |                                |                                                 |                              |                              |                                  |                              |                             |                             |                             |
| MI or family history of MI                            |                             |                             |                                |                                                 |                              |                              |                                  |                              |                             |                             |                             |
| CHD or family history of CHD                          |                             |                             |                                |                                                 |                              |                              |                                  |                              |                             |                             |                             |
| CVD or family history of CVD                          |                             |                             |                                |                                                 |                              |                              |                                  |                              |                             |                             |                             |
| <b>Medications</b>                                    |                             |                             |                                |                                                 |                              |                              |                                  |                              |                             |                             |                             |
| ASA                                                   |                             |                             |                                |                                                 |                              |                              |                                  |                              |                             |                             |                             |
| <b>Other confounding variables not listed:</b>        |                             |                             | Fermented milk                 | eGFR, proteinuria, primary renal disease, hsCRP |                              | Birth cohort, house score    |                                  |                              | †                           |                             |                             |

**Table S2. Page 11/11**

| Study                                                 | Von Ruesten, 2013 <sup>148</sup> | Vormund, 2015 <sup>149</sup> | Wang, 2016 <sup>150</sup> | Watkins, 2000 <sup>151</sup> | Whiteman, 1999 <sup>152</sup> | Yamada, 2011 <sup>153</sup> | Yokoyama, 2000 <sup>154</sup> | Yoshizaki, 2019 <sup>155</sup> | Yu, 2014 <sup>156</sup> | Zhang, 2011 <sup>157</sup> | Zhang, 2011 <sup>158</sup> |
|-------------------------------------------------------|----------------------------------|------------------------------|---------------------------|------------------------------|-------------------------------|-----------------------------|-------------------------------|--------------------------------|-------------------------|----------------------------|----------------------------|
| <b>No. of variables fully adjusted model</b>          | 11                               | 8                            | 7                         | 17                           | 3                             | 11                          | 9                             | 17                             | 13                      | 17                         | 11                         |
| <b>No. of multivariable models presented</b>          | 2                                | 3                            | 1                         | 1                            | 1                             | 2                           | 1                             | 3                              | 2                       | 1                          | 1                          |
| <b>Timing of measurement of confounding variables</b> | BL, q2-3y                        | BL                           | BL                        | BL                           | BL                            | BL                          | BL                            | BL                             | BL                      | BL                         | BL                         |
| <b>Pre-specified primary confounding variables</b>    |                                  |                              |                           |                              |                               |                             |                               |                                |                         |                            |                            |
| Age                                                   | ✓                                | ✓                            | ✓                         | ✓                            | ✓                             | ✓                           | ✓                             | ✓                              | ✓                       | ✓                          | ✓                          |
| <b>Pre-specified secondary confounding variables</b>  |                                  |                              |                           |                              |                               |                             |                               |                                |                         |                            |                            |
| Sex                                                   | ✓                                | ✓                            | ✓                         | ✓                            | ✓                             | ✓                           | ✓                             | ✓                              |                         | ✓                          | ✓                          |
| Smoking                                               | ✓                                | ✓                            | ✓                         | ✓                            | ✓                             | ✓                           | ✓                             | ✓                              | ✓                       | ✓                          | ✓                          |
| BMI                                                   | ✓                                | ✓                            | ✓                         | ✓                            |                               | ✓                           | ✓                             | ✓                              | ✓                       | ✓                          | ✓                          |
| Physical activity                                     | ✓                                |                              |                           | ✓                            |                               | ✓                           | ✓                             | ✓                              | ✓                       | ✓                          | ✓                          |
| Alcohol                                               | ✓                                |                              | ✓                         | ✓                            |                               | ✓                           | ✓                             | ✓                              |                         | ✓                          | ✓                          |
| Blood pressure                                        | ✓                                |                              |                           | ✓                            |                               | ✓                           | ✓                             | ✓                              | ✓                       | ✓                          | ✓                          |
| Energy                                                |                                  |                              |                           |                              |                               |                             |                               | ✓                              | ✓                       | ✓                          |                            |
| Diabetes                                              |                                  |                              |                           | ✓                            |                               |                             |                               | ✓                              | ✓                       | ✓                          | ✓                          |
| Cholesterol                                           | ✓                                |                              |                           |                              |                               | ✓                           | ✓                             | ✓                              | ✓                       | ✓                          | ✓                          |
| <b>Other Confounding variables</b>                    |                                  |                              |                           |                              |                               |                             |                               |                                |                         |                            |                            |
| Education                                             | ✓                                |                              |                           | ✓                            |                               | ✓                           |                               |                                | ✓                       | ✓                          |                            |
| Socioeconomic status                                  |                                  |                              |                           |                              |                               |                             |                               |                                | ✓                       | ✓                          |                            |
| Menopause and/or hormone Use                          |                                  |                              |                           |                              |                               |                             |                               |                                |                         | ✓                          |                            |
| Region/location                                       |                                  | ✓                            | ✓                         |                              |                               | ✓                           |                               |                                |                         |                            |                            |
| Randomization treatment                               |                                  |                              |                           |                              |                               |                             |                               |                                |                         |                            |                            |
| Ethnicity/nationality                                 |                                  | ✓                            |                           | ✓                            |                               |                             |                               |                                |                         |                            |                            |
| Marital status                                        |                                  | ✓                            |                           | ✓                            |                               | ✓                           |                               |                                |                         |                            |                            |
| Study center                                          |                                  |                              |                           |                              |                               |                             | ✓                             |                                |                         |                            |                            |
| Survey season                                         |                                  | ✓                            | ✓                         |                              |                               |                             |                               |                                |                         |                            |                            |
| Employment status                                     |                                  |                              |                           | ✓                            |                               |                             | ✓                             |                                |                         |                            |                            |
| Follow-up duration                                    |                                  |                              |                           |                              |                               |                             |                               |                                |                         |                            |                            |
| <b>Dietary Intake</b>                                 |                                  |                              |                           |                              |                               |                             |                               |                                |                         |                            |                            |
| Vitamin/supplement                                    | ✓                                |                              |                           |                              |                               |                             |                               |                                | ✓                       | ✓                          |                            |
| Fruit and/or vegetable                                | ✓                                |                              |                           |                              |                               |                             |                               | ✓                              |                         |                            | ✓                          |
| Saturated fat                                         |                                  |                              |                           |                              |                               |                             |                               |                                |                         | ✓                          |                            |
| Whole grains                                          |                                  |                              |                           |                              |                               |                             |                               |                                |                         |                            |                            |
| Fish/shellfish                                        |                                  |                              |                           |                              |                               |                             |                               | ✓                              | ✓                       |                            |                            |
| Meat                                                  |                                  |                              |                           |                              |                               |                             |                               | ✓                              |                         |                            |                            |
| Red meat                                              |                                  |                              |                           | ✓                            |                               |                             |                               |                                | ✓                       |                            |                            |
| Dietary pattern score                                 |                                  |                              |                           |                              |                               |                             |                               |                                |                         |                            |                            |
| Processed meat                                        |                                  |                              |                           |                              |                               |                             |                               |                                |                         |                            |                            |
| Coffee                                                |                                  |                              |                           | ✓                            |                               |                             |                               |                                |                         |                            |                            |
| Fibre                                                 |                                  |                              |                           |                              |                               |                             |                               |                                |                         |                            |                            |
| Folate                                                |                                  |                              |                           |                              |                               |                             |                               |                                |                         |                            |                            |
| Sodium                                                |                                  |                              |                           |                              |                               |                             |                               | ✓                              |                         |                            |                            |
| Vitamin E                                             |                                  |                              |                           |                              |                               |                             |                               |                                |                         |                            |                            |
| <b>Disease History</b>                                |                                  |                              |                           |                              |                               |                             |                               |                                |                         |                            |                            |
| MI or family history of MI                            |                                  |                              |                           |                              |                               |                             |                               |                                |                         |                            |                            |
| CHD or family history of CHD                          |                                  |                              |                           |                              |                               |                             | ✓                             |                                |                         | ✓                          |                            |
| CVD or family history of CVD                          |                                  |                              |                           |                              |                               |                             |                               |                                |                         |                            |                            |
| <b>Medications</b>                                    |                                  |                              |                           |                              |                               |                             |                               |                                |                         |                            |                            |
| ASA                                                   |                                  |                              |                           | ✓                            |                               |                             |                               |                                |                         |                            |                            |
| <b>Other confounding variables not listed:</b>        |                                  |                              |                           | Stroke, Diuretics            |                               |                             |                               | Mental stress                  |                         | Occupation, stroke         | Stroke                     |

ASA - acetylsalicylic acid; BL - baseline; CHD – coronary heart disease; CRP – C-reactive protein; CVD – cardiovascular disease; GFR – glomerular filtration rate; FA – fatty acid; MI – myocardial infarction; M/PUFA - mono/poly-unsaturated fatty acids; Querc – quercetin supplement; qXy - confounding variables measured once every X years; WC – waist circumference.

\*Tanaka et al. (2013) adjusted for the following additional confounding variables: dyslipidemia, HbA1c, oral antihyperglycemic agents, insulin, retinopathy, dietary cholesterol, dietary fat and  $\Omega$ -3 and  $\Omega$ -6 FA.

**Table S3:** Newcastle-Ottawa Scale (NOS) for Assessing the Quality of Cohort Studies

| <b>Study</b>                      | <b>Selection<sup>a</sup></b> | <b>Outcome<sup>b</sup></b> | <b>Comparability<sup>‡</sup></b> | <b>Total<sup>§</sup></b> |
|-----------------------------------|------------------------------|----------------------------|----------------------------------|--------------------------|
| Adriouch, 2018 <sup>42</sup>      | 3                            | 2                          | 2                                | 7                        |
| Appleby, 2002 <sup>43</sup>       | 1                            | 1                          | 1                                | 3                        |
| Atkins, 2014 <sup>44</sup>        | 3                            | 3                          | 1                                | 7                        |
| Bahadoran, 2017 <sup>45</sup>     | 2                            | 1                          | 0                                | 3                        |
| Bazzano, 2002 <sup>46</sup>       | 2                            | 3                          | 1                                | 6                        |
| Belin, 2011 <sup>47</sup>         | 3                            | 3                          | 2                                | 8                        |
| Bendinelli, 2011 <sup>48</sup>    | 3                            | 3                          | 2                                | 8                        |
| Berard, 2017 <sup>49</sup>        | 3                            | 3                          | 1                                | 7                        |
| Bhupathiraju, 2013 <sup>50</sup>  | 2                            | 2                          | 1                                | 5                        |
| Bingham, 2008 <sup>51</sup>       | 2                            | 0                          | 2                                | 4                        |
| Bleckenhorst, 2017 <sup>52</sup>  | 2                            | 3                          | 2                                | 7                        |
| Bos, 2014 <sup>53</sup>           | 2                            | 3                          | 2                                | 7                        |
| Buijsse, 2008 <sup>54</sup>       | 3                            | 3                          | 1                                | 7                        |
| Buil-Cosiales, 2016 <sup>56</sup> | 3                            | 3                          | 2                                | 8                        |
| Buil-Cosiales, 2017 <sup>55</sup> | 3                            | 1                          | 2                                | 6                        |
| Cassidy, 2012 <sup>57</sup>       | 2                            | 2                          | 2                                | 6                        |
| Collin, 2019 <sup>58</sup>        | 3                            | 3                          | 1                                | 7                        |
| Conrad, 2018 <sup>59</sup>        | 3                            | 3                          | 1                                | 7                        |
| Dauchet, 2004 <sup>60</sup>       | 3                            | 3                          | 2                                | 8                        |
| Dauchet, 2010 <sup>61</sup>       | 4                            | 3                          | 2                                | 9                        |
| Du, 2016 <sup>62</sup>            | 4                            | 3                          | 1                                | 8                        |
| Du, 2017 <sup>63</sup>            | 4                            | 3                          | 1                                | 8                        |
| Elwood, 2013 <sup>64</sup>        | 3                            | 3                          | 1                                | 7                        |
| Eriksen, 2015 <sup>65</sup>       | 3                            | 3                          | 2                                | 8                        |
| Fitzgerald, 2012 <sup>66</sup>    | 2                            | 2                          | 1                                | 5                        |
| Fraser, 1992 <sup>67</sup>        | 2                            | 3                          | 2                                | 7                        |
| Gardener, 2011 <sup>68</sup>      | 4                            | 2                          | 1                                | 7                        |
| Gaziano, 1995 <sup>69</sup>       | 2                            | 3                          | 1                                | 6                        |
| Genkinger, 2004 <sup>70</sup>     | 3                            | 3                          | 1                                | 7                        |
| Gillman, 1995 <sup>71</sup>       | 3                            | 3                          | 2                                | 8                        |
| Goetz, 2016 <sup>72</sup>         | 3                            | 2                          | 1                                | 6                        |
| Goetz, 2016 <sup>73</sup>         | 3                            | 3                          | 1                                | 7                        |
| Gunge, 2017 <sup>74</sup>         | 3                            | 3                          | 2                                | 8                        |

| <b>Study</b>                  | <b>Selection<sup>*</sup></b> | <b>Outcome<sup>†</sup></b> | <b>Comparability<sup>‡</sup></b> | <b>Total<sup>§</sup></b> |
|-------------------------------|------------------------------|----------------------------|----------------------------------|--------------------------|
| Gunnell, 2013 <sup>75</sup>   | 3                            | 1                          | 2                                | 6                        |
| Hansen, 2010 <sup>77</sup>    | 3                            | 3                          | 2                                | 8                        |
| Hansen, 2017 <sup>76</sup>    | 2                            | 3                          | 2                                | 7                        |
| Harriss, 2007 <sup>78</sup>   | 3                            | 3                          | 2                                | 8                        |
| Hertog, 1997 <sup>79</sup>    | 2                            | 3                          | 2                                | 7                        |
| Hirvonen, 2000 <sup>81</sup>  | 2                            | 3                          | 2                                | 7                        |
| Hirvonen, 2001 <sup>80</sup>  | 2                            | 3                          | 2                                | 7                        |
| Hjartaker, 2015 <sup>82</sup> | 2                            | 3                          | 1                                | 6                        |
| Hodgson, 2016 <sup>83</sup>   | 2                            | 3                          | 2                                | 7                        |
| Holmberg, 2009 <sup>84</sup>  | 2                            | 3                          | 0                                | 5                        |
| Iso, 2007 <sup>85</sup>       | 2                            | 2                          | 1                                | 5                        |
| Jacques, 2015 <sup>86</sup>   | 3                            | 3                          | 1                                | 7                        |
| Johnsen, 2003 <sup>87</sup>   | 3                            | 2                          | 2                                | 7                        |
| Joshiyura, 1999 <sup>88</sup> | 2                            | 2                          | 2                                | 6                        |
| Joshiyura, 2009 <sup>89</sup> | 2                            | 3                          | 2                                | 7                        |
| Keli, 1996 <sup>90</sup>      | 4                            | 3                          | 1                                | 8                        |
| Kim, 2013 <sup>91</sup>       | 1                            | 3                          | 0                                | 4                        |
| Knekt, 1994 <sup>94</sup>     | 4                            | 3                          | 1                                | 8                        |
| Knekt, 1996 <sup>93</sup>     | 2                            | 3                          | 2                                | 7                        |
| Knekt, 2000 <sup>92</sup>     | 4                            | 3                          | 2                                | 9                        |
| Kobylecki, 2015 <sup>95</sup> | 3                            | 3                          | 2                                | 8                        |
| Kondo, 2019 <sup>96</sup>     | 3                            | 3                          | 1                                | 7                        |
| Kvaavik, 2010 <sup>97</sup>   | 4                            | 3                          | 1                                | 8                        |
| Lai, 2015 <sup>98</sup>       | 3                            | 3                          | 1                                | 7                        |
| Larsson, 2009 <sup>99</sup>   | 2                            | 3                          | 2                                | 7                        |
| Larsson, 2013 <sup>100</sup>  | 3                            | 3                          | 2                                | 8                        |
| Leenders, 2013 <sup>102</sup> | 3                            | 3                          | 2                                | 8                        |
| Leenders, 2014 <sup>101</sup> | 3                            | 3                          | 2                                | 8                        |
| Lin, 2007 <sup>103</sup>      | 2                            | 2                          | 2                                | 6                        |
| Lin, 2017 <sup>104</sup>      | 3                            | 3                          | 1                                | 7                        |
| Liu, 2000 <sup>106</sup>      | 2                            | 3                          | 2                                | 7                        |
| Liu, 2001 <sup>105</sup>      | 2                            | 3                          | 2                                | 7                        |
| Mann, 1997 <sup>107</sup>     | 2                            | 3                          | 1                                | 6                        |
| Manuel, 2015 <sup>108</sup>   | 4                            | 3                          | 1                                | 8                        |
| Miller, 2017 <sup>109</sup>   | 3                            | 3                          | 2                                | 8                        |



| <b>Study</b>                     | <b>Selection<sup>*</sup></b> | <b>Outcome<sup>†</sup></b> | <b>Comparability<sup>‡</sup></b> | <b>Total<sup>§</sup></b> |
|----------------------------------|------------------------------|----------------------------|----------------------------------|--------------------------|
| Mink, 2007 <sup>110</sup>        | 3                            | 3                          | 2                                | 8                        |
| Mizrahi, 2009 <sup>111</sup>     | 4                            | 3                          | 2                                | 9                        |
| Mori, 2018 <sup>112</sup>        | 3                            | 3                          | 2                                | 8                        |
| Mytton, 2018 <sup>113</sup>      | 3                            | 3                          | 2                                | 8                        |
| Nagura, 2009 <sup>114</sup>      | 3                            | 3                          | 2                                | 8                        |
| Nakamura, 2008 <sup>115</sup>    | 2                            | 3                          | 2                                | 7                        |
| Nechuta, 2010 <sup>116</sup>     | 3                            | 3                          | 1                                | 7                        |
| Neelakantan, 2018 <sup>117</sup> | 3                            | 3                          | 2                                | 8                        |
| Ness, 2005 <sup>118</sup>        | 3                            | 3                          | 1                                | 7                        |
| Nothlings, 2008 <sup>119</sup>   | 2                            | 3                          | 1                                | 6                        |
| Okuda, 2015 <sup>120</sup>       | 3                            | 3                          | 1                                | 7                        |
| Oude Griep, 2010 <sup>121</sup>  | 3                            | 3                          | 1                                | 7                        |
| Oude Griep, 2011 <sup>123</sup>  | 2                            | 3                          | 2                                | 7                        |
| Oude Griep, 2011 <sup>122</sup>  | 2                            | 3                          | 2                                | 7                        |
| Oyebode, 2014 <sup>124</sup>     | 3                            | 3                          | 1                                | 7                        |
| Pham, 2007 <sup>125</sup>        | 3                            | 3                          | 2                                | 8                        |
| Rebello, 2014 <sup>126</sup>     | 3                            | 3                          | 1                                | 7                        |
| Rissanen, 2003 <sup>127</sup>    | 2                            | 3                          | 2                                | 7                        |
| Saglimbene, 2017 <sup>128</sup>  | 1                            | 0                          | 0                                | 1                        |
| Sahyoun, 1996 <sup>129</sup>     | 1                            | 3                          | 1                                | 5                        |
| Sauvaget, 2003 <sup>130</sup>    | 2                            | 3                          | 2                                | 7                        |
| Scheffers, 2019 <sup>131</sup>   | 3                            | 3                          | 2                                | 8                        |
| Sesso, 2003 <sup>132</sup>       | 2                            | 3                          | 2                                | 7                        |
| Sesso, 2003 <sup>134</sup>       | 2                            | 3                          | 2                                | 7                        |
| Sesso, 2007 <sup>133</sup>       | 3                            | 2                          | 2                                | 7                        |
| Shah, 2018 <sup>135</sup>        | 3                            | 3                          | 2                                | 8                        |
| Sharma, 2013 <sup>136</sup>      | 3                            | 2                          | 0                                | 5                        |
| Sharma, 2014 <sup>137</sup>      | 3                            | 2                          | 0                                | 5                        |
| Simila, 2013 <sup>138</sup>      | 2                            | 3                          | 1                                | 6                        |
| Sonestedt, 2015 <sup>139</sup>   | 4                            | 3                          | 2                                | 9                        |
| Sotomayer, 2019 <sup>140</sup>   | 1                            | 3                          | 2                                | 6                        |
| Steffen, 2003 <sup>141</sup>     | 4                            | 3                          | 2                                | 9                        |
| Stefler, 2016 <sup>142</sup>     | 2                            | 3                          | 1                                | 6                        |
| Strandhagen, 2000 <sup>143</sup> | 2                            | 3                          | 1                                | 6                        |
| Takachi, 2008 <sup>144</sup>     | 3                            | 3                          | 2                                | 8                        |

| <b>Study</b>                     | <b>Selection*</b> | <b>Outcome†</b> | <b>Comparability‡</b> | <b>Total§</b> |
|----------------------------------|-------------------|-----------------|-----------------------|---------------|
| Tanaka, 2013 <sup>145</sup>      | 2                 | 3               | 2                     | 7             |
| Tognon, 2014 <sup>146</sup>      | 3                 | 3               | 1                     | 7             |
| Tucker, 2005 <sup>147</sup>      | 2                 | 3               | 1                     | 6             |
| Von Ruesten, 2013 <sup>148</sup> | 3                 | 2               | 2                     | 7             |
| Vormund, 2015 <sup>149</sup>     | 3                 | 3               | 1                     | 7             |
| Wang, 2016 <sup>150</sup>        | 1                 | 3               | 1                     | 5             |
| Watkins, 2000 <sup>151</sup>     | 3                 | 3               | 2                     | 8             |
| Whiteman, 1999 <sup>152</sup>    | 3                 | 3               | 1                     | 7             |
| Yamada, 2011 <sup>153</sup>      | 2                 | 3               | 2                     | 7             |
| Yokoyama, 2000 <sup>154</sup>    | 2                 | 3               | 2                     | 7             |
| Yoshizaki, 2019 <sup>155</sup>   | 3                 | 3               | 2                     | 8             |
| Yu, 2014 <sup>156</sup>          | 3                 | 3               | 2                     | 8             |
| Zhang, 2011 <sup>157</sup>       | 3                 | 3               | 2                     | 8             |
| Zhang, 2011 <sup>158</sup>       | 3                 | 2               | 2                     | 7             |

\*Maximum 4 points awarded for representativeness of exposed cohort, selection of non-exposed cohort, exposure assessment, and demonstration outcome not present at baseline.

†Maximum 3 points awarded for outcome assessment, follow-up length, and adequacy of follow-up.

‡Maximum 2 points awarded for adjusting for the pre-specified primary confounding variable (age) and 5 of the 7 pre-specified secondary confounding variables (sex, family history of CVD, smoking, body mass index, blood pressure (or hypertension/medications), cholesterol (or dyslipidemia/medications) and presence of diabetes mellitus).

§A maximum of 9 points could be awarded.

**Table S4.** GRADE Assessment for Fruits and Vegetables and Cardiovascular Disease Incidence

| Quality Assessment                                                                                       |               |              |                          |                       |                       |                         |                                      | Study Event Rates (%) | Relative Risk (95% CI) | Certainty               |
|----------------------------------------------------------------------------------------------------------|---------------|--------------|--------------------------|-----------------------|-----------------------|-------------------------|--------------------------------------|-----------------------|------------------------|-------------------------|
| No. of Cohorts                                                                                           | Design        | Risk of Bias | Inconsistency            | Indirectness          | Imprecision           | Publication Bias        | Other                                |                       |                        |                         |
| <b>Fruit and Vegetable Consumption on Cardiovascular Disease Incidence (follow-up median 10 years)</b>   |               |              |                          |                       |                       |                         |                                      |                       |                        |                         |
| 12                                                                                                       | observational | not serious  | not serious              | not serious           | serious <sup>1</sup>  | undetected              | dose-response gradient <sup>2</sup>  | 24,310/501,744 (4.9%) | 0.93 (0.89, 0.96)      | ⊕⊕○○<br><b>LOW</b>      |
| <b>Fruit Consumption on Cardiovascular Disease Incidence (follow-up median 10 years)</b>                 |               |              |                          |                       |                       |                         |                                      |                       |                        |                         |
| 16                                                                                                       | observational | not serious  | not serious              | not serious           | not serious           | undetected              | dose-response gradient <sup>3</sup>  | 27,204/577,323 (4.7%) | 0.91 (0.88, 0.95)      | ⊕⊕○○<br><b>LOW</b>      |
| <b>Vegetable Consumption on Cardiovascular Disease Incidence (follow-up median 11 years)</b>             |               |              |                          |                       |                       |                         |                                      |                       |                        |                         |
| 14                                                                                                       | observational | not serious  | not serious              | not serious           | serious <sup>4</sup>  | undetected              | none                                 | 22,810/539,683 (4.2%) | 0.94 (0.90, 0.97)      | ⊕○○○<br><b>VERY LOW</b> |
| <b>Berries Consumption on Cardiovascular Disease Incidence (follow-up median 10 years)</b>               |               |              |                          |                       |                       |                         |                                      |                       |                        |                         |
| 1                                                                                                        | observational | not serious  | not serious <sup>5</sup> | serious <sup>6</sup>  | serious <sup>7</sup>  | undetected <sup>8</sup> | none                                 | 1,004/38,176 (2.6%)   | 1.27 (0.95, 1.71)      | ⊕○○○<br><b>VERY LOW</b> |
| <b>Citrus Fruit Consumption on Cardiovascular Disease Incidence (follow-up median 10 years)</b>          |               |              |                          |                       |                       |                         |                                      |                       |                        |                         |
| 6                                                                                                        | observational | not serious  | not serious              | not serious           | serious <sup>9</sup>  | undetected <sup>8</sup> | dose-response gradient <sup>10</sup> | 6,220/222,525 (2.8%)  | 0.88 (0.80, 0.96)      | ⊕⊕○○<br><b>LOW</b>      |
| <b>Fruit Juice Consumption on Cardiovascular Disease Incidence (follow-up median 15 years)</b>           |               |              |                          |                       |                       |                         |                                      |                       |                        |                         |
| 5                                                                                                        | observational | not serious  | not serious              | not serious           | serious <sup>11</sup> | undetected <sup>8</sup> | none                                 | 8,056/167,879 (4.8%)  | 1.00 (0.93, 1.07)      | ⊕○○○<br><b>VERY LOW</b> |
| <b>Pommes Consumption on Cardiovascular Disease Incidence (follow-up median 8 years)</b>                 |               |              |                          |                       |                       |                         |                                      |                       |                        |                         |
| 5                                                                                                        | observational | not serious  | not serious              | serious <sup>12</sup> | not serious           | undetected <sup>8</sup> | dose-response gradient <sup>13</sup> | 2,578/149,437 (1.7%)  | 0.76 (0.66, 0.88)      | ⊕⊕○○<br><b>LOW</b>      |
| <b>Allium Vegetables Consumption on Cardiovascular Disease Incidence (follow-up median 7 years)</b>      |               |              |                          |                       |                       |                         |                                      |                       |                        |                         |
| 2                                                                                                        | observational | not serious  | serious <sup>14</sup>    | serious <sup>15</sup> | serious <sup>16</sup> | undetected <sup>8</sup> | none                                 | 808/40,814 (2.0%)     | 0.79 (0.57, 1.10)      | ⊕○○○<br><b>VERY LOW</b> |
| <b>Cruciferous Vegetables Consumption on Cardiovascular Disease Incidence (follow-up median 9 years)</b> |               |              |                          |                       |                       |                         |                                      |                       |                        |                         |
| 7                                                                                                        | observational | not serious  | serious <sup>17</sup>    | not serious           | serious <sup>18</sup> | undetected <sup>8</sup> | none                                 | 6,824/273,878 (2.5%)  | 0.99 (0.90, 1.08)      | ⊕○○○<br><b>VERY LOW</b> |
| <b>Green Leafy Vegetables Consumption on Cardiovascular Disease Incidence (follow-up median 7 years)</b> |               |              |                          |                       |                       |                         |                                      |                       |                        |                         |
| 5                                                                                                        | observational | not serious  | not serious              | not serious           | serious <sup>19</sup> | undetected <sup>8</sup> | dose-response gradient <sup>20</sup> | 5,732/211,902 (2.7%)  | 0.87 (0.76, 0.99)      | ⊕⊕○○<br><b>LOW</b>      |
| <b>Tomatoes Consumption on Cardiovascular Disease Incidence (follow-up median 9 years)</b>               |               |              |                          |                       |                       |                         |                                      |                       |                        |                         |
| 2                                                                                                        | observational | not serious  | not serious              | serious <sup>21</sup> | serious <sup>22</sup> | undetected <sup>8</sup> | none                                 | 841/55,452 (1.5%)     | 0.97 (0.78, 1.20)      | ⊕○○○<br><b>VERY LOW</b> |

<sup>1</sup> Downgrade for serious imprecision, as the lower bound of the 95% CI (RR, 0.89) includes the minimally important difference (MID) of 5% while the upper bound of the 95% CI (RR, 0.96) crosses the MID.

- <sup>2</sup> Upgrade for a dose-response gradient, as the GLST analysis revealed a significant linear inverse relationship between total fruit and vegetable intake and incident CVD ( $p < 0.001$ ).
- <sup>3</sup> Upgrade for a dose-response gradient, as the GLST analysis revealed a significant linear inverse relationship between fruit intake and incident CVD ( $p = 0.004$ ).
- <sup>4</sup> Downgrade for serious imprecision, as the lower bound of the 95% CI (RR, 0.90) includes the MID of 5% while the upper bound of the 95% CI (RR, 0.97) crosses the MID.
- <sup>5</sup> No downgrade for inconsistency as analyses for inconsistency could not be performed due to  $< 2$  observations available.
- <sup>6</sup> Downgrade for serious indirectness as evidence is based on 1 cohort of female health-professionals residing in the USA and may not be generalizable to different populations.
- <sup>7</sup> Downgrade for serious imprecision, as the lower and upper bound of the 95% CIs (RR, 0.95 to 1.27) includes both clinically important benefit ( $RR \leq 0.95$ ) and harm ( $RR \geq 1.05$ ).
- <sup>8</sup> No downgrade for publication bias as publication bias could not be assessed due to lack of power for assessing funnel plot asymmetry and small study effects (i.e.  $< 10$  observations available).
- <sup>9</sup> Downgrade for serious imprecision, as the lower bound of the 95% CI (RR, 0.80) includes the MID of 5% while the upper bound of the 95% CI (RR, 0.96) crosses the MID.
- <sup>10</sup> Upgrade for a dose-response gradient, as the MKSPLINE analysis revealed a significant non-linear inverse relationship between citrus fruit intake and CVD incidence ( $p = 0.033$ ).
- <sup>11</sup> Downgrade for serious imprecision, as the lower and upper bound of the 95% CIs (RR, 0.93 to 1.07) includes both clinically important benefit ( $RR < 0.95$ ) and harm ( $RR \geq 1.05$ ).
- <sup>12</sup> Downgrade for serious indirectness as evidence is based on a predominately ( $> 78\%$ ) female population and may not be generalizable to different populations.
- <sup>13</sup> Upgrade for a dose-response gradient, as the GLST analysis revealed a significant linear inverse relationship between pomes intake and incident CVD ( $p = 0.043$ ).
- <sup>14</sup> Downgrade for serious inconsistency given evidence of substantial inter-study heterogeneity ( $I^2 = 85\%$ ,  $p = 0.01$ ), which could not be explored through sensitivity due to only 2 observations available.
- <sup>15</sup> Downgrade for serious indirectness as evidence is based on a predominately (97%) female populations of which most are health professionals, and may not be generalizable to different populations.
- <sup>16</sup> Downgrade for serious imprecision, as the lower bound of the 95% CI (RR, 0.57) includes the MID of 5% while the upper bound of the 95% CI (RR, 1.10) crosses the MID.
- <sup>17</sup> Downgrade for serious inconsistency as there was evidence of substantial inter-study heterogeneity ( $I^2 = 52\%$ ,  $p = 0.04$ ). Although the removal of Buil-Cosiales et al. 2016 during sensitivity analysis did partially explain the heterogeneity ( $I^2 = 27\%$ ,  $p = 0.22$ ), the presence of residual heterogeneity could not be excluded.
- <sup>18</sup> Downgrade for serious imprecision, as the lower and upper bound of the 95% CIs (RR, 0.90 to 1.08) includes both clinically important benefit ( $RR \leq 0.95$ ) and harm ( $RR \geq 1.05$ ).
- <sup>19</sup> Downgrade for serious imprecision, as the lower bound of the 95% CI (RR, 0.76) includes the minimally important difference (MID) of 5% while the upper bound of the 95% CI (RR, 0.99) crosses the MID.
- <sup>20</sup> Upgrade for a dose-response gradient, as the MKSPLINE analysis revealed a significant non-linear inverse relationship between green leafy vegetables intake and CVD mortality ( $p = 0.01$ ).
- <sup>21</sup> Downgrade for serious indirectness as evidence is based on a predominately (88%) female population and may not be generalizable to different populations.
- <sup>22</sup> Downgrade for serious imprecision, as the lower and upper bound of the 95% CIs (RR, 0.78 to 1.20) includes both clinically important benefit ( $RR \leq 0.95$ ) and harm ( $RR \geq 1.05$ ).

**Table S5.** GRADE Assessment for Fruits and Vegetables and Cardiovascular Disease Mortality

| Quality Assessment                                                                                     |               |                      |                           |                       |                       |                          |                                     | Study Event Rates (%)   | Relative Risk (95% CI) | Certainty               |
|--------------------------------------------------------------------------------------------------------|---------------|----------------------|---------------------------|-----------------------|-----------------------|--------------------------|-------------------------------------|-------------------------|------------------------|-------------------------|
| No. of Cohorts                                                                                         | Design        | Risk of Bias         | Inconsistency             | Indirectness          | Imprecision           | Publication Bias         | Other                               |                         |                        |                         |
| <b>Fruit and Vegetable Consumption on Cardiovascular Disease Mortality (follow-up median 11 years)</b> |               |                      |                           |                       |                       |                          |                                     |                         |                        |                         |
| 14                                                                                                     | observational | not serious          | serious <sup>1</sup>      | not serious           | not serious           | undetected               | dose-response gradient <sup>2</sup> | 17,439/798,391 (2.2%)   | 0.89 (0.85, 0.93)      | ⊕⊕○○<br><b>LOW</b>      |
| <b>Fruit Consumption on Cardiovascular Disease Mortality (follow-up median 11 years)</b>               |               |                      |                           |                       |                       |                          |                                     |                         |                        |                         |
| 27                                                                                                     | observational | not serious          | serious <sup>3</sup>      | not serious           | not serious           | undetected               | dose-response gradient <sup>4</sup> | 39,623/1,581,506 (2.5%) | 0.88 (0.86, 0.91)      | ⊕⊕○○<br><b>LOW</b>      |
| <b>Vegetable Consumption on Cardiovascular Disease Mortality (follow-up median 10 years)</b>           |               |                      |                           |                       |                       |                          |                                     |                         |                        |                         |
| 21                                                                                                     | observational | not serious          | serious <sup>5</sup>      | not serious           | not serious           | undetected               | dose-response gradient <sup>6</sup> | 33,516/1,101,435 (3.0%) | 0.87 (0.85, 0.90)      | ⊕⊕○○<br><b>LOW</b>      |
| <b>Apricot Consumption on Cardiovascular Disease Mortality (follow-up median 1.5 years)</b>            |               |                      |                           |                       |                       |                          |                                     |                         |                        |                         |
| 1                                                                                                      | observational | serious <sup>7</sup> | not serious <sup>8</sup>  | serious <sup>9</sup>  | not serious           | undetected <sup>10</sup> | none                                | 515/9,757 (5.3%)        | 1.84 (1.27, 2.67)      | ⊕○○○<br><b>VERY LOW</b> |
| <b>Bananas Consumption on Cardiovascular Disease Mortality 16(follow-up median 20.3 years)</b>         |               |                      |                           |                       |                       |                          |                                     |                         |                        |                         |
| 1                                                                                                      | observational | not serious          | not serious <sup>8</sup>  | serious <sup>12</sup> | serious <sup>13</sup> | undetected <sup>10</sup> | none                                | 4,595/9,766 (47.1%)     | 1.06 (0.87, 1.29)      | ⊕○○○<br><b>VERY LOW</b> |
| <b>Berries Consumption on Cardiovascular Disease Mortality (follow-up median 16 years)</b>             |               |                      |                           |                       |                       |                          |                                     |                         |                        |                         |
| 4                                                                                                      | observational | not serious          | not serious               | serious <sup>14</sup> | serious <sup>15</sup> | undetected <sup>10</sup> | none                                | 7,401/112,892 (6.6%)    | 0.97 (0.92, 1.03)      | ⊕○○○<br><b>VERY LOW</b> |
| <b>Citrus Fruit Consumption on Cardiovascular Disease Mortality (follow-up median 17 years)</b>        |               |                      |                           |                       |                       |                          |                                     |                         |                        |                         |
| 3                                                                                                      | observational | not serious          | not serious <sup>16</sup> | serious <sup>17</sup> | serious <sup>18</sup> | undetected <sup>10</sup> | none                                | 7,197/74,716 (9.6%)     | 0.95 (0.90, 1.02)      | ⊕○○○<br><b>VERY LOW</b> |
| <b>Dried Fruit Consumption on Cardiovascular Disease Mortality (follow-up median 17 years)</b>         |               |                      |                           |                       |                       |                          |                                     |                         |                        |                         |
| 2                                                                                                      | observational | not serious          | not serious               | not serious           | serious <sup>19</sup> | undetected <sup>10</sup> | none                                | 447/31,757 (1.4%)       | 0.93 (0.63, 1.37)      | ⊕○○○<br><b>VERY LOW</b> |
| <b>Fruit Juice Consumption on Cardiovascular Disease Mortality (follow-up median 17 years)</b>         |               |                      |                           |                       |                       |                          |                                     |                         |                        |                         |
| 1                                                                                                      | observational | not serious          | not serious <sup>8</sup>  | serious <sup>20</sup> | serious <sup>21</sup> | undetected <sup>10</sup> | none                                | 286/30,458 (0.9%)       | 0.81 (0.58, 1.13)      | ⊕○○○<br><b>VERY LOW</b> |
| <b>Grapes Consumption on Cardiovascular Disease Mortality (follow-up median 16.7 years)</b>            |               |                      |                           |                       |                       |                          |                                     |                         |                        |                         |
| 3                                                                                                      | observational | not serious          | not serious <sup>22</sup> | serious <sup>23</sup> | serious <sup>24</sup> | undetected <sup>10</sup> | none                                | 7,197/74,716 (9.6%)     | 0.90 (0.81, 1.01)      | ⊕○○○<br><b>VERY LOW</b> |
| <b>Pommes Consumption on Cardiovascular Disease Mortality (follow-up median 16 years)</b>              |               |                      |                           |                       |                       |                          |                                     |                         |                        |                         |
| 5                                                                                                      | observational | not serious          | not serious               | serious <sup>25</sup> | not serious           | undetected <sup>10</sup> | none                                | 7,947/85,929 (9.2%)     | 0.86 (0.80, 0.92)      | ⊕○○○<br><b>VERY LOW</b> |
| <b>Allium Vegetables Consumption on Cardiovascular Disease Mortality (follow-up median 15 years)</b>   |               |                      |                           |                       |                       |                          |                                     |                         |                        |                         |
| 1                                                                                                      | observational | not serious          | not serious <sup>8</sup>  | serious <sup>26</sup> | not serious           | undetected <sup>10</sup> | none                                | 238/1,226 (19.4%)       | 0.33 (0.22, 0.49)      | ⊕○○○<br><b>VERY LOW</b> |
| <b>Carrots Consumption on Cardiovascular Disease Mortality (follow-up median 18 years)</b>             |               |                      |                           |                       |                       |                          |                                     |                         |                        |                         |

|                                                                                                           |               |             |                          |                       |                       |                          |      |                          |                      |                         |
|-----------------------------------------------------------------------------------------------------------|---------------|-------------|--------------------------|-----------------------|-----------------------|--------------------------|------|--------------------------|----------------------|-------------------------|
| 2                                                                                                         | observational | not serious | not serious              | serious <sup>27</sup> | serious <sup>28</sup> | undetected <sup>10</sup> | none | 4,792/10,325<br>(46.4%)  | 0.92<br>(0.85, 1.01) | ⊕○○○<br><b>VERY LOW</b> |
| <b>Celery Consumption on Cardiovascular Disease Mortality (follow-up median 16 years)</b>                 |               |             |                          |                       |                       |                          |      |                          |                      |                         |
| 1                                                                                                         | observational | not serious | not serious <sup>8</sup> | serious <sup>29</sup> | serious <sup>30</sup> | undetected <sup>10</sup> | none | 2,316/34,492<br>(6.7%)   | 0.91<br>(0.83, 1.01) | ⊕○○○<br><b>VERY LOW</b> |
| <b>Cruciferous Vegetables Consumption on Cardiovascular Disease Mortality (follow-up median 12 years)</b> |               |             |                          |                       |                       |                          |      |                          |                      |                         |
| 7                                                                                                         | observational | not serious | serious <sup>31</sup>    | not serious           | not serious           | undetected <sup>10</sup> | none | 13,081/187,730<br>(7.0%) | 0.85<br>(0.82, 0.89) | ⊕○○○<br><b>VERY LOW</b> |
| <b>Green Leafy Vegetables Consumption on Cardiovascular Disease Mortality (follow-up median 21 years)</b> |               |             |                          |                       |                       |                          |      |                          |                      |                         |
| 5                                                                                                         | observational | not serious | serious <sup>32</sup>    | not serious           | not serious           | undetected <sup>10</sup> | none | 6,661/40,893<br>(16.3%)  | 0.87<br>(0.81, 0.94) | ⊕⊕○○<br><b>LOW</b>      |
| <b>Tomatoes Consumption on Cardiovascular Disease Mortality (follow-up median 16 years)</b>               |               |             |                          |                       |                       |                          |      |                          |                      |                         |
| 3                                                                                                         | observational | not serious | not serious              | serious <sup>33</sup> | serious <sup>34</sup> | undetected <sup>9</sup>  | none | 7,072/45,557<br>(15.5%)  | 0.98<br>(0.93, 1.04) | ⊕○○○<br><b>VERY LOW</b> |

<sup>1</sup> Downgrade for serious inconsistency as there was evidence of substantial inter-study heterogeneity ( $I^2=68\%$ ,  $p<0.001$ ) which could not be explained by sensitivity analyses.

<sup>2</sup> Upgrade for a dose-response gradient, as the GLST analysis revealed a significant linear inverse relationship between fruit and vegetable intake and CVD mortality ( $p<0.011$ ). The MKSPLINE procedure indicated a departure from linearity ( $p<0.001$ ) at a threshold of 4 servings/day as observed by visual inspection.

<sup>3</sup> Downgrade for serious inconsistency as there was evidence of substantial inter-study heterogeneity ( $I^2=79\%$ ,  $p<0.001$ ), which could not be explained by sensitivity analyses.

<sup>4</sup> Upgrade for a dose-response gradient, as the GLST analysis revealed a significant linear inverse relationship between fruit intake and CVD mortality ( $p=0.005$ ).

<sup>5</sup> Downgrade for serious inconsistency as there was evidence of substantial inter-study heterogeneity ( $I^2=59\%$ ,  $p<0.001$ ), which could not be explained by sensitivity analyses.

<sup>6</sup> Upgrade for a dose-response gradient, as the GLST analysis revealed a significant linear inverse relationship between fruit intake and CVD mortality ( $p<0.001$ ).

<sup>7</sup> Downgrade for serious risk of bias as the effect estimate is based on Saglimbene et al. 2017, which presented with a high risk of bias (Newcastle-Ottawa Score: 1/9)

<sup>8</sup> No downgrade for inconsistency as analyses for inconsistency could not be performed due to  $<2$  observations available

<sup>9</sup> Downgrade for serious indirectness as evidence is based on 1 cohort of patients receiving hemodialysis and may not be generalizable to different populations.

<sup>10</sup> No downgrade for publication bias as publication bias could not be assessed due to lack of power for assessing funnel plot asymmetry and small study effects (i.e.  $<10$  observations available).

<sup>11</sup> No downgrade for inconsistency as analyses for inconsistency could not be performed due to  $<2$  observations available

<sup>12</sup> Downgrade for serious indirectness as evidence is based on 1 male cohort and may not be generalizable to different populations

<sup>13</sup> Downgrade for serious imprecision, as the lower and upper bound of the 95% CIs (RR, 0.87 to 1.29) includes both clinically important benefit (RR $<0.95$ ) and harm (RR $\geq 1.05$ ).

<sup>14</sup> Downgrade for serious indirectness as evidence is based on a predominately (91%) female population and may not be generalizable to different populations.

<sup>15</sup> Downgrade for serious imprecision, as the lower bound of the 95% CI (RR, 0.92) includes the minimally important difference (MID) of 5% while the upper bound of the 95% CI (RR, 1.03) crosses the MID.

<sup>16</sup> No downgrade for inconsistency as the presence of inter-study heterogeneity ( $I^2=62\%$ ,  $p=0.05$ ) was explained by the removal of Lai et al. 2015 ( $I^2=0\%$ ,  $p=0.63$ ) during sensitivity analysis.

<sup>17</sup> Downgrade for serious indirectness as the evidence is based on a predominately (87%) female population and may not be generalizable to different populations.

<sup>18</sup> Downgrade for serious imprecision, as upper bound of the 95% CIs (RR 1.02) crosses the MID (RR $<0.95$ ).

<sup>19</sup> Downgrade for serious imprecision, as upper bound of the 95% CIs (RR 1.37) crosses the MID (RR $<0.95$ ).

- <sup>20</sup> Downgrade for serious indirectness as evidence is based on 1 female cohort residing in the United Kingdom and may not be generalizable to different populations.
- <sup>21</sup> Downgrade for serious imprecision, as the lower and upper bound of the 95% CIs (RR, 0.58 to 1.13) includes both clinically important benefit (RR<0.95) and harm (RR≥1.05).
- <sup>22</sup> No downgrade for inconsistency as the presence of inter-study heterogeneity ( $I^2=61\%$ ,  $p=0.08$ ) was explained by the removal of Lai et al. 2015 ( $I^2=0\%$ ,  $p=0.93$ ) during sensitivity analysis.
- <sup>23</sup> Downgrade for serious indirectness as evidence is based on a predominately (87%) female population and may not be generalizable to different populations.
- <sup>24</sup> Downgrade for serious imprecision, as the upper bound of the 95% CIs (RR, 1.01) crosses the MID (RR<0.95).
- <sup>25</sup> Downgrade for serious indirectness as evidence is based on a predominately (87%) female population and may not be generalizable to different populations.
- <sup>26</sup> Downgrade for serious indirectness as evidence is based on 1 female cohort and may not be generalizable to different populations.
- <sup>27</sup> Downgrade for serious indirectness as evidence is based on 2 male cohorts and may not be generalizable to different populations.
- <sup>28</sup> Downgrade for serious imprecision, as the lower bound of the 95% CI (RR, 0.85) includes the minimally important difference (MID) of 5% while the upper bound of the 95% CI (RR, 1.01) crosses the MID.
- <sup>29</sup> No downgrade for inconsistency as analyses for inconsistency could not be performed due to <2 observations available
- <sup>30</sup> Downgrade for serious imprecision, as the lower bound of the 95% CI (RR, 0.76) includes the minimally important difference (MID) of 5% while the upper bound of the 95% CI (RR, 0.99) crosses the MID.
- <sup>31</sup> Downgrade for serious inconsistency as there was evidence for substantial inter-study heterogeneity ( $I^2=86\%$ ,  $p<0.00001$ ), which could not be explained by sensitivity analyses.
- <sup>32</sup> Downgrade for serious inconsistency as there was evidence of substantial inter-study heterogeneity ( $I^2=88\%$ ,  $p<0.00001$ ), which could not be explained by sensitivity analyses.
- <sup>33</sup> Downgrade for serious indirectness as evidence is based on only 3 isolated geographical regions (Norway and Massachusetts and Iowa, USA) and may not be generalizable to different populations.
- <sup>34</sup> Downgrade for serious imprecision, as the upper bound of the 95% CIs (RR, 1.04) includes crosses the MID (RR<0.95).

**Table S6.** GRADE Assessment for Fruits and Vegetables and Coronary Heart Disease Incidence

| Quality Assessment                                                                                        |               |              |                          |                       |                       |                         |                                      | Study Event Rates (%)   | Relative Risk (95% CI) | Certainty               |
|-----------------------------------------------------------------------------------------------------------|---------------|--------------|--------------------------|-----------------------|-----------------------|-------------------------|--------------------------------------|-------------------------|------------------------|-------------------------|
| No. of Cohorts                                                                                            | Design        | Risk of Bias | Inconsistency            | Indirectness          | Imprecision           | Publication Bias        | Other                                |                         |                        |                         |
| <b>Fruit and Vegetable Consumption on Coronary Heart Disease Incidence (follow-up median 10 years)</b>    |               |              |                          |                       |                       |                         |                                      |                         |                        |                         |
| 19                                                                                                        | observational | not serious  | not serious              | not serious           | not serious           | undetected              | dose-response gradient <sup>1</sup>  | 17,987/619,182 (2.9%)   | 0.88 (0.83, 0.92)      | ⊕⊕⊕○<br><b>MODERATE</b> |
| <b>Fruit Consumption on Coronary Heart Disease Incidence (follow-up median 10 years)</b>                  |               |              |                          |                       |                       |                         |                                      |                         |                        |                         |
| 20                                                                                                        | observational | not serious  | not serious              | not serious           | not serious           | undetected              | dose-response gradient <sup>2</sup>  | 23,856/1,170,021 (2.0%) | 0.88 (0.84, 0.92)      | ⊕⊕⊕○<br><b>MODERATE</b> |
| <b>Vegetable Consumption on Coronary Heart Disease Incidence (follow-up median 10 years)</b>              |               |              |                          |                       |                       |                         |                                      |                         |                        |                         |
| 18                                                                                                        | observational | not serious  | not serious <sup>3</sup> | not serious           | serious <sup>4</sup>  | undetected              | dose-response gradient <sup>5</sup>  | 17,172/696,330 (2.5%)   | 0.92 (0.87, 0.96)      | ⊕⊕○○<br><b>LOW</b>      |
| <b>Bananas Consumption on Coronary Heart Disease Incidence (follow-up median 7.6 years)</b>               |               |              |                          |                       |                       |                         |                                      |                         |                        |                         |
| 1                                                                                                         | observational | not serious  | not serious <sup>6</sup> | serious <sup>7</sup>  | serious <sup>8</sup>  | undetected <sup>9</sup> | none                                 | 365/122,635 (0.3%)      | 0.76 (0.56, 1.02)      | ⊕○○○<br><b>VERY LOW</b> |
| <b>Berries Consumption on Coronary Heart Disease Incidence (follow-up median 8 years)</b>                 |               |              |                          |                       |                       |                         |                                      |                         |                        |                         |
| 4                                                                                                         | observational | not serious  | serious <sup>10</sup>    | not serious           | serious <sup>11</sup> | undetected <sup>9</sup> | none                                 | 2,233/100,296 (2.2%)    | 0.94 (0.82, 1.09)      | ⊕○○○<br><b>VERY LOW</b> |
| <b>Citrus Fruit Consumption on Coronary Heart Disease Incidence (follow-up median 9 years)</b>            |               |              |                          |                       |                       |                         |                                      |                         |                        |                         |
| 10                                                                                                        | observational | not serious  | not serious              | not serious           | serious <sup>12</sup> | undetected              | dose-response gradient <sup>12</sup> | 8,333/364,978 (2.3%)    | 0.91 (0.85, 0.98)      | ⊕⊕○○<br><b>LOW</b>      |
| <b>Fruit Juice Consumption on Coronary Heart Disease Incidence (follow-up median 15 years)</b>            |               |              |                          |                       |                       |                         |                                      |                         |                        |                         |
| 4                                                                                                         | observational | not serious  | not serious              | not serious           | serious <sup>14</sup> | undetected <sup>9</sup> | none                                 | 7,589/109,898 (6.9%)    | 0.99 (0.92, 1.07)      | ⊕○○○<br><b>VERY LOW</b> |
| <b>Grapes Consumption on Coronary Heart Disease Incidence (follow-up median 12 years)</b>                 |               |              |                          |                       |                       |                         |                                      |                         |                        |                         |
| 1                                                                                                         | observational | not serious  | not serious <sup>6</sup> | serious <sup>15</sup> | serious <sup>16</sup> | undetected <sup>9</sup> | none                                 | 8,333/364,978 (2.3%)    | 0.91 (0.85, 0.98)      | ⊕○○○<br><b>VERY LOW</b> |
| <b>Pommes Consumption on Coronary Heart Disease Incidence (follow-up median 8 years)</b>                  |               |              |                          |                       |                       |                         |                                      |                         |                        |                         |
| 8                                                                                                         | observational | not serious  | not serious              | not serious           | serious <sup>17</sup> | undetected <sup>9</sup> | none                                 | 4,886/371,684 (1.3%)    | 0.90 (0.84, 0.97)      | ⊕○○○<br><b>VERY LOW</b> |
| <b>Watermelon Consumption on Coronary Heart Disease Incidence (follow-up median 7.6 years)</b>            |               |              |                          |                       |                       |                         |                                      |                         |                        |                         |
| 1                                                                                                         | observational | not serious  | not serious              | serious <sup>16</sup> | serious <sup>19</sup> | undetected <sup>9</sup> | none                                 | 365/122,635 (0.3%)      | 0.87 (0.64, 1.18)      | ⊕○○○<br><b>VERY LOW</b> |
| <b>Allium Vegetables Consumption on Coronary Heart Disease Incidence (follow-up median 10 years)</b>      |               |              |                          |                       |                       |                         |                                      |                         |                        |                         |
| 5                                                                                                         | observational | not serious  | not serious              | not serious           | serious <sup>20</sup> | undetected <sup>9</sup> | none                                 | 1,734/210,964 (0.8%)    | 0.93 (0.80, 1.09)      | ⊕○○○<br><b>VERY LOW</b> |
| <b>Cruciferous Vegetables Consumption on Coronary Heart Disease Incidence (follow-up median 11 years)</b> |               |              |                          |                       |                       |                         |                                      |                         |                        |                         |
| 8                                                                                                         | observational | not serious  | not serious              | not serious           | not serious           | undetected <sup>9</sup> | none                                 | 9,383/347,453 (2.7%)    | 1.01 (0.95, 1.07)      | ⊕⊕○○<br><b>LOW</b>      |



| Green Leafy Vegetables Consumption on Coronary Heart Disease Incidence(follow-up median 16 years) |               |             |             |                       |                       |                         |                                      |                         |                      |                                                                                                        |
|---------------------------------------------------------------------------------------------------|---------------|-------------|-------------|-----------------------|-----------------------|-------------------------|--------------------------------------|-------------------------|----------------------|--------------------------------------------------------------------------------------------------------|
| 5                                                                                                 | observational | not serious | not serious | not serious           | not serious           | undetected <sup>9</sup> | dose-response gradient <sup>21</sup> | 6,696/170,250<br>(3.9%) | 0.82<br>(0.76, 0.89) | <br><b>MODERATE</b> |
| Tomatoes Consumption on Coronary Heart Disease Incidence(follow-up median 8 years)                |               |             |             |                       |                       |                         |                                      |                         |                      |                                                                                                        |
| 3                                                                                                 | observational | not serious | not serious | serious <sup>22</sup> | serious <sup>23</sup> | undetected <sup>9</sup> | none                                 | 1,283/134,494<br>(1.0%) | 0.80<br>(0.57, 1.13) | <br><b>VERY LOW</b> |

<sup>1</sup> Upgrade for a dose-response gradient, as the GLST analysis revealed a significant linear inverse relationship between fruit and vegetable intake and coronary heart disease incidence (CHD) (p<0.001).

<sup>2</sup> Upgrade for a dose-response gradient, as the GLST analysis revealed a significant linear inverse relationship between fruit intake and CHD (p=0.005).

<sup>3</sup> No downgrade for inconsistency as the presence of inter-study heterogeneity (I<sup>2</sup>=53%, p=0.002) was explained by the removal of Dauchet et al. 2010 (I<sup>2</sup>=0%, p=0.5)

<sup>4</sup> Downgrade for serious imprecision, as the lower bound of the 95% CI (RR, 0.87) includes the minimally important difference (MID) of 5% while the upper bound of the 95% CI (RR, 0.96) crosses the MID.

<sup>5</sup> Upgrade for a dose-response gradient, as the GLST analysis revealed a significant linear inverse relationship between vegetable intake and CHD (p<0.001).

<sup>6</sup> No downgrade for inconsistency as analyses for inconsistency could not be performed due to <2 observations available

<sup>7</sup> Downgrade for serious indirectness as evidence is based on only 1 geographical regions (China) and may not be generalizable to different populations.

<sup>8</sup> Downgrade for serious imprecision, as the upper bound of the 95% CIs (RR, 1.02) crosses the MID (RR<0.95).

<sup>9</sup> No downgrade for publication bias as publication bias could not be assessed due to lack of power for assessing funnel plot asymmetry and small study effects (i.e. <10 observations available).

<sup>10</sup> Downgrade for serious inconsistency as there was evidence of substantial inter-study heterogeneity (I<sup>2</sup>=74%, p=0.008), which could not be explained by sensitivity analyses.

<sup>11</sup> Downgrade for serious imprecision, as the lower and upper bound of the 95% CIs (RR, 0.82 to 1.09) includes both clinically important benefit (RR<0.95) and harm (RR≥1.05).

<sup>12</sup> Downgrade for serious imprecision, as the lower bound of the 95% CI (RR, 0.85) includes the minimally important difference (MID) of 5% while the upper bound of the 95% CI (RR, 0.98) crosses the MID.

<sup>13</sup> Upgrade for a dose-response gradient, as the MKSPLINE analysis indicated a significant non-linear inverse relationship between citrus intake and incident CHD (p=0.005).

<sup>14</sup> Downgrade for serious imprecision, as the lower and upper bound of the 95% CIs (RR, 0.92 to 1.07) includes both clinically important benefit (RR<0.95) and harm (RR≥1.05).

<sup>15</sup> Downgrade for serious indirectness as evidence is based on 1 female cohort of health professionals and may not be generalizable to different populations.

<sup>16</sup> Downgrade for serious imprecision, as the lower bound of the 95% CI (RR, 0.85) includes the minimally important difference (MID) of 5% while the upper bound of the 95% CI (RR, 0.98) crosses the MID.

<sup>17</sup> Downgrade for serious imprecision, as the lower bound of the 95% CI (RR, 0.84) includes the minimally important difference (MID) of 5% while the upper bound of the 95% CI (RR, 0.97) crosses the MID.

<sup>18</sup> Downgrade for serious imprecision, as the lower and upper bound of the 95% CIs (RR, 0.64 to 1.18) includes both clinically important benefit (RR<0.95) and harm (RR≥1.05).

<sup>19</sup> Downgrade for serious imprecision, as the lower and upper bound of the 95% CIs (RR, 0.80 to 1.09) includes both clinically important benefit (RR<0.95) and harm (RR≥1.05).

<sup>20</sup> Upgrade for a dose-response gradient, as the GLST analysis revealed a significant linear inverse relationship between fruit intake and CVD mortality (p=0.002). The MKSPLINE procedure indicated a departure from linearity (p=0.004) at threshold of 0.5 servings/day as observed by visual inspection.

<sup>21</sup> Downgrade for serious indirectness as the evidence is based only on female populations, predominately (77.9%) of which reside in USA, and may not be generalizable to different populations.

<sup>22</sup> Downgrade for serious imprecision, as the lower and upper bound of the 95% CIs (RR, 0.57 to 1.13) includes both clinically important benefit (RR<0.95) and harm (RR≥1.05)

**Table S7. GRADE Assessment for Fruits and Vegetables and Coronary Heart Disease Mortality**

| Quality Assessment                                                                                     |               |                       |                          |                           |                       |                         |                                     | Study Event Rates (%)   | Relative Risk (95% CI) | Certainty               |
|--------------------------------------------------------------------------------------------------------|---------------|-----------------------|--------------------------|---------------------------|-----------------------|-------------------------|-------------------------------------|-------------------------|------------------------|-------------------------|
| No. of Cohorts                                                                                         | Design        | Risk of Bias          | Inconsistency            | Indirectness              | Imprecision           | Publication Bias        | Other                               |                         |                        |                         |
| <b>Fruit and Vegetable Consumption on Coronary Heart Disease Mortality (follow-up median 18 years)</b> |               |                       |                          |                           |                       |                         |                                     |                         |                        |                         |
| 5                                                                                                      | observational | not serious           | not serious              | not serious               | not serious           | undetected <sup>1</sup> | dose-response gradient <sup>2</sup> | 3,240/489,635 (0.7%)    | 0.81 (0.72, 0.92)      | ⊕⊕⊕○<br><b>MODERATE</b> |
| <b>Fruit Consumption on Coronary Heart Disease Mortality (follow-up median 13 years)</b>               |               |                       |                          |                           |                       |                         |                                     |                         |                        |                         |
| 21                                                                                                     | observational | not serious           | serious <sup>3</sup>     | not serious               | not serious           | undetected              | dose-response gradient <sup>4</sup> | 14,786/1,398,863 (1.1%) | 0.86 (0.82, 0.90)      | ⊕⊕○○<br><b>LOW</b>      |
| <b>Vegetable Consumption on Coronary Heart Disease Mortality (follow-up median 13 years)</b>           |               |                       |                          |                           |                       |                         |                                     |                         |                        |                         |
| 18                                                                                                     | observational | not serious           | not serious              | not serious               | not serious           | undetected              | dose-response gradient <sup>5</sup> | 26,007/1,968,325 (1.3%) | 0.86 (0.83, 0.89)      | ⊕⊕⊕○<br><b>MODERATE</b> |
| <b>Bananas Consumption on Coronary Heart Disease Mortality (follow-up median 20 years)</b>             |               |                       |                          |                           |                       |                         |                                     |                         |                        |                         |
| 1                                                                                                      | observational | not serious           | not serious <sup>6</sup> | serious <sup>7</sup>      | serious <sup>8</sup>  | undetected <sup>1</sup> | none                                | 2,384/9,964 (4.9%)      | 1.04 (0.81, 1.34)      | ⊕○○○<br><b>VERY LOW</b> |
| <b>Berries Consumption on Coronary Heart Disease Mortality (follow-up median 17 years)</b>             |               |                       |                          |                           |                       |                         |                                     |                         |                        |                         |
| 5                                                                                                      | observational | not serious           | not serious              | not serious               | serious <sup>9</sup>  | undetected <sup>1</sup> | none                                | 5,141/105,420 (4.9%)    | 0.98 (0.91, 1.05)      | ⊕○○○<br><b>VERY LOW</b> |
| <b>Citrus Fruit Consumption on Coronary Heart Disease Mortality (follow-up median 16 years)</b>        |               |                       |                          |                           |                       |                         |                                     |                         |                        |                         |
| 6                                                                                                      | observational | not serious           | not serious              | serious <sup>10</sup>     | serious <sup>11</sup> | undetected <sup>1</sup> | none                                | 5,309/180,574 (2.9%)    | 0.91 (0.85, 0.96)      | ⊕○○○<br><b>VERY LOW</b> |
| <b>Dried Fruit Consumption on Coronary Heart Disease Mortality (follow-up median 17 years)</b>         |               |                       |                          |                           |                       |                         |                                     |                         |                        |                         |
| 1                                                                                                      | observational | not serious           | not serious <sup>6</sup> | serious <sup>12</sup>     | serious <sup>13</sup> | undetected <sup>1</sup> | none                                | 38/30,458 (0.1%)        | 0.79 (0.47, 1.31)      | ⊕○○○<br><b>VERY LOW</b> |
| <b>Fruit Juice Consumption on Coronary Heart Disease Mortality (follow-up median 17 years)</b>         |               |                       |                          |                           |                       |                         |                                     |                         |                        |                         |
| 3                                                                                                      | observational | serious <sup>14</sup> | not serious              | not serious <sup>15</sup> | serious <sup>16</sup> | undetected <sup>1</sup> | none                                | 1,249/141,170 (0.9%)    | 0.87 (0.75, 1.01)      | ⊕○○○<br><b>VERY LOW</b> |
| <b>Grapes Consumption on Coronary Heart Disease Mortality (follow-up median 17 years)</b>              |               |                       |                          |                           |                       |                         |                                     |                         |                        |                         |
| 3                                                                                                      | observational | not serious           | not serious              | serious <sup>17</sup>     | serious <sup>18</sup> | undetected <sup>1</sup> | none                                | 2,846/106,782 (2.7%)    | 0.97 (0.77, 1.21)      | ⊕○○○<br><b>VERY LOW</b> |
| <b>Pommes Consumption on Coronary Heart Disease Mortality (follow-up median 19 years)</b>              |               |                       |                          |                           |                       |                         |                                     |                         |                        |                         |
| 5                                                                                                      | observational | not serious           | not serious              | serious <sup>19</sup>     | not serious           | undetected <sup>1</sup> | none                                | 4,650/146,407 (3.2%)    | 0.84 (0.76, 0.92)      | ⊕○○○<br><b>VERY LOW</b> |
| <b>Allium Vegetables Consumption on Coronary Heart Disease Mortality (follow-up median 15 years)</b>   |               |                       |                          |                           |                       |                         |                                     |                         |                        |                         |
| 4                                                                                                      | observational | not serious           | serious <sup>20</sup>    | serious <sup>21</sup>     | not serious           | undetected <sup>1</sup> | none                                | 1,280/75,434 (1.7%)     | 0.67 (0.57, 0.79)      | ⊕○○○<br><b>VERY LOW</b> |
| <b>Carrots Consumption on Coronary Heart Disease Mortality (follow-up median 13 years)</b>             |               |                       |                          |                           |                       |                         |                                     |                         |                        |                         |

|                                                                                                           |               |                       |                           |                       |                       |                         |      |                         |                      |                         |
|-----------------------------------------------------------------------------------------------------------|---------------|-----------------------|---------------------------|-----------------------|-----------------------|-------------------------|------|-------------------------|----------------------|-------------------------|
| 1                                                                                                         | observational | not serious           | not serious <sup>6</sup>  | serious <sup>22</sup> | serious <sup>23</sup> | undetected <sup>1</sup> | none | 64/10,802<br>(0.6%)     | 0.76<br>(0.37, 1.58) | ⊕○○○<br><b>VERY LOW</b> |
| <b>Celery Consumption on Coronary Heart Disease Mortality (follow-up median 16 years)</b>                 |               |                       |                           |                       |                       |                         |      |                         |                      |                         |
| 1                                                                                                         | observational | not serious           | not serious <sup>24</sup> | serious <sup>25</sup> | serious <sup>26</sup> | undetected <sup>1</sup> | none | 1,329/34,492<br>(3.9%)  | 0.92<br>(0.80, 1.06) | ⊕○○○<br><b>VERY LOW</b> |
| <b>Cruciferous Vegetables Consumption on Coronary Heart Disease Mortality (follow-up median 16 years)</b> |               |                       |                           |                       |                       |                         |      |                         |                      |                         |
| 6                                                                                                         | observational | serious <sup>27</sup> | serious <sup>28</sup>     | not serious           | serious <sup>29</sup> | undetected <sup>1</sup> | none | 7,420/296,772<br>(2.5%) | 0.91<br>(0.85, 0.98) | ⊕○○○<br><b>VERY LOW</b> |
| <b>Green Leafy Vegetables Consumption on Coronary Heart Disease Mortality (follow-up median 17 years)</b> |               |                       |                           |                       |                       |                         |      |                         |                      |                         |
| 5                                                                                                         | observational | serious <sup>30</sup> | not serious               | not serious           | not serious           | undetected <sup>1</sup> | none | 4,591/148,133<br>(3.1%) | 0.86<br>(0.78, 0.94) | ⊕○○○<br><b>VERY LOW</b> |
| <b>Tomatoes Consumption on Coronary Heart Disease Mortality (follow-up median 16 years)</b>               |               |                       |                           |                       |                       |                         |      |                         |                      |                         |
| 3                                                                                                         | observational | serious <sup>31</sup> | not serious               | not serious           | serious <sup>32</sup> | undetected <sup>1</sup> | none | 3,657/175,088<br>(2.1%) | 0.92<br>(0.82, 1.04) | ⊕○○○<br><b>VERY LOW</b> |

<sup>1</sup> No downgrade for publication bias as publication bias could not be assessed due to lack of power for assessing funnel plot asymmetry and small study effects (i.e. <10 observations available).

<sup>2</sup> Upgrade for a dose-response gradient, as the MKSPLINE analysis revealed a significant non-linear inverse relationship between fruit and vegetable intake and CHD mortality (p=0.044)

<sup>3</sup> Downgrade for serious inconsistency as there was evidence of substantial inter-study heterogeneity ( $I^2=62\%$ ,  $p<0.0001$ ). Although heterogeneity could be partially explained by the removal of Du et al. 2017 ( $I^2=44\%$ ,  $p=0.01$ ) and Hjartaker et al. 2015 ( $I^2=46\%$ ,  $p=0.007$ ) during sensitivity analyses, the presence of residual heterogeneity could not be excluded.

<sup>4</sup> Upgrade for a dose-response gradient, as the GLST analysis revealed a significant linear inverse relationship between fruit intake and CHD mortality (p<0.001).

<sup>5</sup> Upgrade for a dose-response gradient, as the GLST analysis revealed a significant linear inverse relationship between vegetable intake and CHD mortality (p=0.005).

<sup>6</sup> No downgrade for inconsistency as analyses for inconsistency could not be performed due to <2 observations available.

<sup>7</sup> Downgrade for serious indirectness as evidence is based on 1 male cohort and may not be generalizable to different populations.

<sup>8</sup> Downgrade for serious imprecision, as the lower and upper bound of the 95% CIs (RR, 0.81 to 1.34) includes both clinically important benefit (RR<0.95) and harm (RR≥1.05).

<sup>9</sup> Downgrade for serious imprecision, as the lower and upper bound of the 95% CIs (RR, 0.91 to 1.05) includes both clinically important benefit (RR<0.95) and harm (RR≥1.05).

<sup>10</sup> Downgrade for serious indirectness as evidence is based on a predominately (≥69.6%) female populations and may not be generalizable to different populations.

<sup>11</sup> Downgrade for serious imprecision, as the lower bound of the 95% CI (RR, 0.85) includes the minimally important difference (MID) of 5% while the upper bound of the 95% CI (RR, 0.96) crosses the MID.

<sup>12</sup> Downgrade for serious indirectness as evidence is based on 1 female cohort and may not be generalizable to different populations.

<sup>13</sup> Downgrade for serious imprecision, as the lower and upper bound of the 95% CIs (RR, 0.47 to 1.31) includes both clinically important benefit (RR<0.95) and harm (RR≥1.05).

<sup>14</sup> Downgrade for serious risk of bias as 56% of effect estimate is based on Iso et al. 2007, which presented with a high risk of bias (Newcastle-Ottawa Score: 5/9).

<sup>15</sup> No downgrade for inconsistency as the presence of inter-study heterogeneity ( $I^2=71\%$ ,  $p=0.02$ ) was explained by the removal of Collin et al. 2019 ( $I^2=0\%$ ,  $p=0.45$ ).

<sup>16</sup> Downgrade for serious imprecision, as the upper bound of the 95% CIs (RR, 1.01) crosses the MID (RR<0.95).

<sup>17</sup> Downgrade for serious indirectness as evidence is based on a predominately (91%) female population of which the majority are health professionals and may not be generalizable to different populations.

- <sup>18</sup> Downgrade for serious imprecision, as the lower and upper bound of the 95% CIs (RR, 0.77 to 1.21) includes both clinically important benefit (RR<0.95) and harm (RR≥1.05).
- <sup>19</sup> Downgrade for serious indirectness as evidence is based on a predominately (82.1%) female populations and may not be generalizable to different populations.
- <sup>20</sup> Downgrade for serious inconsistency as there was evidence of substantial inter-study heterogeneity (I<sup>2</sup>=88%, p<0.00001). Although heterogeneity could be partially explained by the removal of Blekkenhorst et al. 2017 (I<sup>2</sup>=47%, p=0.13) during sensitivity analyses, the presence of residual heterogeneity could not be excluded.
- <sup>21</sup> Downgrade for serious indirectness as evidence is based on a predominately (95.4%) female populations and may not be generalizable to different populations.
- <sup>22</sup> Downgrade for serious indirectness as evidence is based on 1 female cohort and may not be generalizable to different populations.
- <sup>23</sup> Downgrade for serious imprecision, as the lower and upper bound of the 95% CIs (RR, 0.37 to 1.58) includes both clinically important benefit (RR<0.95) and harm (RR≥1.05).
- <sup>24</sup> No downgrade for inconsistency as analyses for inconsistency could not be performed due to <2 observations available.
- <sup>25</sup> Downgrade for serious indirectness as evidence is based on 1 female cohort and may not be generalizable to different populations.
- <sup>26</sup> Downgrade for serious imprecision, as the lower and upper bound of the 95% CIs (RR, 0.80 to 1.06) includes both clinically important benefit (RR<0.95) and harm (RR≥1.05).
- <sup>27</sup> Downgrade for serious risk of bias as 39.3% of effect estimate is based on Iso et al. 2007, which presented with a high risk of bias (Newcastle-Ottawa Score: 1/9).
- <sup>28</sup> Downgrade for serious inconsistency as there was evidence of substantial inter-study heterogeneity (I<sup>2</sup>=88%, p<0.00001) which could not be explained by sensitivity analyses.
- <sup>29</sup> Downgrade for serious imprecision, as the lower bound of the 95% CI (RR, 0.85) includes the minimally important difference (MID) of 5% while the upper bound of the 95% CI (RR, 0.98) crosses the MID.
- <sup>30</sup> Downgrade for serious risk of bias as 36.8% of effect estimate is based on Iso et al. 2007, which presented with a high risk of bias (Newcastle-Ottawa Score: 1/9)
- <sup>31</sup> Downgrade for serious risk of bias as 48.0% of effect estimate is based on Iso et al. 2007, which presented with a high risk of bias (Newcastle-Ottawa Score: 1/9)
- <sup>32</sup> Downgrade for serious imprecision, as the lower bound of the 95% CI (RR, 0.82) includes the minimally important difference (MID) of 5% while the upper bound of the 95% CI (RR, 1.04) crosses the MID.

**Table S8. GRADE Assessment for Fruits and Vegetables and Stroke Incidence**

| Quality Assessment                                                                        |               |              |                           |                       |                       |                         |                                      | Study Event Rates (%) | Relative Risk (95% CI) | Certainty               |
|-------------------------------------------------------------------------------------------|---------------|--------------|---------------------------|-----------------------|-----------------------|-------------------------|--------------------------------------|-----------------------|------------------------|-------------------------|
| No. of Cohorts                                                                            | Design        | Risk of Bias | Inconsistency             | Indirectness          | Imprecision           | Publication Bias        | Other                                |                       |                        |                         |
| <b>Fruit and Vegetable Consumption on Stroke Incidence (follow-up median 9 years)</b>     |               |              |                           |                       |                       |                         |                                      |                       |                        |                         |
| 14                                                                                        | observational | not serious  | not serious               | not serious           | not serious           | undetected              | dose-response gradient <sup>1</sup>  | 11,091/532,667 (2.1%) | 0.82 (0.77, 0.88)      | ⊕⊕⊕⊕<br><b>MODERATE</b> |
| <b>Fruit Consumption on Stroke Incidence (follow-up median 14 years)</b>                  |               |              |                           |                       |                       |                         |                                      |                       |                        |                         |
| 17                                                                                        | observational | not serious  | not serious               | not serious           | not serious           | undetected              | dose-response gradient <sup>2</sup>  | 43,702/987,983 (4.4%) | 0.82 (0.79, 0.85)      | ⊕⊕⊕⊕<br><b>MODERATE</b> |
| <b>Vegetable Consumption on Stroke Incidence (follow-up median 14 years)</b>              |               |              |                           |                       |                       |                         |                                      |                       |                        |                         |
| 16                                                                                        | observational | not serious  | serious <sup>3</sup>      | not serious           | not serious           | undetected              | dose-response gradient <sup>4</sup>  | 13,607/564,531 (2.4%) | 0.82 (0.83, 0.93)      | ⊕⊕⊕⊕<br><b>MODERATE</b> |
| <b>Berries Consumption on Stroke Incidence (follow-up median 10 years)</b>                |               |              |                           |                       |                       |                         |                                      |                       |                        |                         |
| 4                                                                                         | observational | not serious  | not serious <sup>5</sup>  | not serious           | serious <sup>6</sup>  | undetected <sup>7</sup> | none                                 | 5,967/143,662 (4.2%)  | 1.03 (0.94, 1.13)      | ⊕○○○<br><b>VERY LOW</b> |
| <b>Citrus Fruit Consumption on Stroke Incidence (follow-up median 11 years)</b>           |               |              |                           |                       |                       |                         |                                      |                       |                        |                         |
| 8                                                                                         | observational | not serious  | serious <sup>8</sup>      | not serious           | not serious           | undetected <sup>7</sup> | dose-response gradient <sup>9</sup>  | 7,142/225,613 (3.2%)  | 0.88 (0.82, 0.94)      | ⊕⊕○○<br><b>LOW</b>      |
| <b>Fruit Juice Consumption on Stroke Incidence (follow-up median 11 years)</b>            |               |              |                           |                       |                       |                         |                                      |                       |                        |                         |
| 4                                                                                         | observational | not serious  | not serious <sup>10</sup> | not serious           | serious <sup>11</sup> | undetected <sup>7</sup> | none                                 | 1,705/148,839 (1.2%)  | 0.82 (0.68, 0.99)      | ⊕○○○<br><b>VERY LOW</b> |
| <b>Pommes Consumption on Stroke Incidence (follow-up median 14 years)</b>                 |               |              |                           |                       |                       |                         |                                      |                       |                        |                         |
| 5                                                                                         | observational | not serious  | not serious               | not serious           | not serious           | undetected <sup>7</sup> | dose-response gradient <sup>12</sup> | 7,364/146,723 (5.0%)  | 0.89 (0.84, 0.95)      | ⊕⊕⊕⊕<br><b>MODERATE</b> |
| <b>Allium Vegetables Consumption on Stroke Incidence (follow-up median 28 years)</b>      |               |              |                           |                       |                       |                         |                                      |                       |                        |                         |
| 2                                                                                         | Observational | not serious  | not serious               | serious <sup>13</sup> | serious <sup>14</sup> | undetected <sup>7</sup> | none                                 | 4,912/84,169 (5.8%)   | 0.89 (0.80, 0.99)      | ⊕○○○<br><b>VERY LOW</b> |
| <b>Cruciferous Vegetables Consumption on Stroke Incidence (follow-up median 12 years)</b> |               |              |                           |                       |                       |                         |                                      |                       |                        |                         |
| 6                                                                                         | observational | not serious  | serious <sup>15</sup>     | not serious           | serious <sup>16</sup> | undetected <sup>7</sup> | none                                 | 7,706/255,726 (3.0%)  | 0.98 (0.91, 1.05)      | ⊕○○○<br><b>VERY LOW</b> |
| <b>Green Leafy Vegetables Consumption on Stroke Incidence (follow-up median 9 years)</b>  |               |              |                           |                       |                       |                         |                                      |                       |                        |                         |
| 4                                                                                         | observational | not serious  | not serious               | not serious           | serious <sup>17</sup> | undetected <sup>7</sup> | dose-response gradient <sup>18</sup> | 4,798/196,456 (2.4%)  | 0.88 (0.79, 0.98)      | ⊕⊕○○<br><b>LOW</b>      |
| <b>Tomatoes Consumption on Stroke Incidence (follow-up median 7 years)</b>                |               |              |                           |                       |                       |                         |                                      |                       |                        |                         |
| 1                                                                                         | observational | not serious  | not serious <sup>19</sup> | serious <sup>20</sup> | not serious           | undetected <sup>7</sup> | dose-response gradient <sup>21</sup> | 247/38,445 (0.6%)     | 0.20 (0.05, 0.82)      | ⊕⊕○○<br><b>LOW</b>      |

- <sup>1</sup> Upgrade for a dose-response gradient, as the GLST analysis revealed a significant linear inverse relationship between fruit and vegetable intake and stroke incidence (p=0.002).
- <sup>2</sup> Upgrade for a dose-response gradient, as the GLST analysis revealed a significant linear inverse relationship between fruit intake and stroke incidence (p<0.001).
- <sup>3</sup> Downgrade for serious inconsistency given evidence of substantial inter-study heterogeneity (I<sup>2</sup>=50%, p=0.006) that could not be explained during sensitivity analysis.
- <sup>4</sup> Upgrade for a dose-response gradient, as the MKSPLINE analysis revealed a significant non-linear inverse relationship between vegetable intake and stroke incidence with a departure from linearity at 1.5 servings/day (p=0.012)
- <sup>5</sup> No downgrade for inconsistency as the presence of inter-study heterogeneity (I<sup>2</sup>=50%, p=0.08) was explained by the removal of Hirvonen et al. 2000 – cerebral infraction (I<sup>2</sup>=0%, p=0.41) during sensitivity analysis.
- <sup>6</sup> Downgrade for serious imprecision, as the lower and upper bound of the 95% CIs (RR, 0.94 to 1.13) includes both clinically important benefit (RR<0.95) and harm (RR≥1.05)
- <sup>7</sup> No downgrade for publication bias as publication bias could not be assessed due to lack of power for assessing funnel plot asymmetry and small study effects (i.e. <10 observations available).
- <sup>8</sup> Downgrade for serious inconsistency given evidence of substantial inter-study heterogeneity (I<sup>2</sup>=51%, p=0.04). Although the removal of Larsson et al. 2013 (I<sup>2</sup>=37%, p=0.14) or Yamada et al. 2011 (I<sup>2</sup>=39%, p=0.12) during sensitivity analysis did partially explain the heterogeneity, the presence of residual heterogeneity could not be excluded.
- <sup>9</sup> Upgrade for a dose-response gradient, as the GLST analysis revealed a significant linear inverse relationship between citrus fruit intake and stroke incidence (p=0.033) and an MKSPLINE analysis revealed a significant non-linear inverse relationship between citrus fruit intake and stroke incidence (p=0.039).
- <sup>10</sup> No downgrade for inconsistency as the presence of inter-study heterogeneity (I<sup>2</sup>=73%, p=0.02) was explained by the removal of Scheffers et al. 2019 (I<sup>2</sup>=0%, p=0.47)
- <sup>11</sup> Downgrade for serious imprecision, as the upper bound of the 95% CIs (RR, 0.99) crosses the MID (RR<0.95).
- <sup>12</sup> Upgrade for a dose-response gradient, as the GLST analysis revealed a significant linear inverse relationship between pommes intake and stroke incidence (p=0.003). MKSPLINE analyses could not be conducted due to small sample size.
- <sup>13</sup> Downgrade for serious indirectness as evidence is based on cohorts residing in Northern Europe and may not be generalizable to different populations.
- <sup>14</sup> Downgrade for serious imprecision, as the lower bound of the 95% CI (RR, 0.80) includes the MID of 5% while the upper bound of the 95% CI (RR, 0.99) crosses the MID.
- <sup>15</sup> Downgrade for serious inconsistency given evidence of substantial inter-study heterogeneity (I<sup>2</sup>=62%, p=0.02). Although the removal of Larsson et al. 2013 (during sensitivity analysis did partially explain the heterogeneity (I<sup>2</sup>=40%, p=0.16), the presence of residual heterogeneity could not be excluded.
- <sup>16</sup> Downgrade for serious imprecision, as the lower and upper bound of the 95% CIs (RR, 0.91 to 1.05) includes both clinically important benefit (RR<0.95) and harm (RR≥1.05).
- <sup>16</sup> Downgrade for serious imprecision, as the lower bound of the 95% CI (RR, 0.79) includes the MID of 5% while the upper bound of the 95% CI (RR, 0.98) crosses the MID.
- <sup>17</sup> Upgrade for a dose-response gradient, as the GLST analysis revealed a significant linear inverse relationship between green leafy vegetable intake and stroke incidence (p=0.008). MKSPLINE analyses could not be conducted due to small sample size.
- <sup>18</sup> No downgrade for inconsistency as analyses for inconsistency could not be performed due to <2 observations available.
- <sup>19</sup> Downgrade for serious indirectness as evidence is based on only 1 cohort of females for USA and may not be generalizable to different populations.
- <sup>20</sup> Upgrade for a dose-response gradient, as the GLST analysis revealed a significant linear inverse relationship between tomato intake and stroke incidence (p=0.002). MKSPLINE analyses could not be conducted due to small sample size.

**Table S9. GRADE Assessment for Fruits and Vegetables and Stroke Mortality**

| Quality Assessment                                                                     |               |                       |                          |                       |                       |                         |                                      | Study Event Rates (%)   | Relative Risk (95% CI) | Certainty               |
|----------------------------------------------------------------------------------------|---------------|-----------------------|--------------------------|-----------------------|-----------------------|-------------------------|--------------------------------------|-------------------------|------------------------|-------------------------|
| No. of Cohorts                                                                         | Design        | Risk of Bias          | Inconsistency            | Indirectness          | Imprecision           | Publication Bias        | Other                                |                         |                        |                         |
| <b>Fruit and Vegetable Consumption on Stroke Mortality (follow-up median 19 years)</b> |               |                       |                          |                       |                       |                         |                                      |                         |                        |                         |
| 6                                                                                      | observational | not serious           | not serious              | not serious           | not serious           | undetected <sup>1</sup> | dose-response gradient <sup>2</sup>  | 3,051/499,732 (0.6%)    | 0.73 (0.65, 0.81)      | ⊕⊕⊕○<br><b>MODERATE</b> |
| <b>Fruit Consumption on Stroke Mortality (follow-up median 20 years)</b>               |               |                       |                          |                       |                       |                         |                                      |                         |                        |                         |
| 14                                                                                     | observational | not serious           | serious <sup>3</sup>     | not serious           | not serious           | undetected              | dose-response gradient <sup>4</sup>  | 10,899/1,282,756 (0.8%) | 0.87 (0.84, 0.91)      | ⊕⊕○○<br><b>LOW</b>      |
| <b>Vegetable Consumption on Stroke Mortality (follow-up median 15 years)</b>           |               |                       |                          |                       |                       |                         |                                      |                         |                        |                         |
| 12                                                                                     | observational | not serious           | serious <sup>5</sup>     | not serious           | serious <sup>6</sup>  | undetected              | dose-response gradient <sup>7</sup>  | 7,551/780,441 (1.0%)    | 0.94 (0.90, 0.99)      | ⊕⊕○○<br><b>LOW</b>      |
| <b>Bananas Consumption on Stroke Mortality (follow-up median 20 years)</b>             |               |                       |                          |                       |                       |                         |                                      |                         |                        |                         |
| 1                                                                                      | observational | not serious           | not serious <sup>8</sup> | serious <sup>9</sup>  | serious <sup>10</sup> | undetected <sup>1</sup> | none                                 | 1,34/9,766 (10.6%)      | 1.04 (0.70, 1.54)      | ⊕○○○<br><b>VERY LOW</b> |
| <b>Berries Consumption on Stroke Mortality (follow-up median 19 years)</b>             |               |                       |                          |                       |                       |                         |                                      |                         |                        |                         |
| 2                                                                                      | observational | not serious           | not serious              | serious <sup>11</sup> | serious <sup>12</sup> | undetected <sup>1</sup> | none                                 | 1,182/40,224 (2.9%)     | 0.97 (0.82, 1.15)      | ⊕○○○<br><b>VERY LOW</b> |
| <b>Citrus Fruit Consumption on Stroke Mortality (follow-up median 20 years)</b>        |               |                       |                          |                       |                       |                         |                                      |                         |                        |                         |
| 4                                                                                      | observational | serious <sup>13</sup> | serious <sup>14</sup>    | not serious           | not serious           | undetected <sup>1</sup> | dose-response gradient <sup>15</sup> | 3,869/145,204 (2.7%)    | 0.90 (0.86, 0.95)      | ⊕⊕○○<br><b>LOW</b>      |
| <b>Dried Fruit Consumption on Stroke Mortality (follow-up median 17 years)</b>         |               |                       |                          |                       |                       |                         |                                      |                         |                        |                         |
| 1                                                                                      | observational | not serious           | not serious              | serious <sup>16</sup> | serious <sup>17</sup> | undetected <sup>1</sup> | none                                 | 152/30,458 (0.5%)       | 0.95 (0.80, 1.13)      | ⊕○○○<br><b>VERY LOW</b> |
| <b>Fruit Juice Consumption on Stroke Mortality (follow-up median 17 years)</b>         |               |                       |                          |                       |                       |                         |                                      |                         |                        |                         |
| 2                                                                                      | observational | serious <sup>18</sup> | not serious              | not serious           | not serious           | undetected <sup>1</sup> | dose-response gradient <sup>19</sup> | 2,232/128,270 (1.7%)    | 0.67 (0.60, 0.76)      | ⊕⊕○○<br><b>LOW</b>      |
| <b>Grapes Consumption on Stroke Mortality (follow-up median 19 years)</b>              |               |                       |                          |                       |                       |                         |                                      |                         |                        |                         |
| 2                                                                                      | observational | not serious           | not serious              | serious <sup>20</sup> | serious <sup>21</sup> | undetected <sup>1</sup> | none                                 | 1,182/40,224 (2.9%)     | 0.74 (0.53, 1.02)      | ⊕○○○<br><b>VERY LOW</b> |
| <b>Pommes Consumption on Stroke Mortality (follow-up median 17 years)</b>              |               |                       |                          |                       |                       |                         |                                      |                         |                        |                         |
| 3                                                                                      | observational | not serious           | not serious              | serious <sup>22</sup> | serious <sup>23</sup> | undetected <sup>1</sup> | none                                 | 1,651/74,716 (2.2%)     | 0.91 (0.77, 1.09)      | ⊕○○○<br><b>VERY LOW</b> |
| <b>Allium Vegetable Consumption on Stroke Mortality (follow-up median 19 years)</b>    |               |                       |                          |                       |                       |                         |                                      |                         |                        |                         |
| 2                                                                                      | observational | not serious           | serious <sup>24</sup>    | not serious           | serious <sup>25</sup> | undetected <sup>1</sup> | none                                 | 544/3,671 (14.8%)       | 0.99 (0.79, 1.24)      | ⊕○○○<br><b>VERY LOW</b> |
| <b>Carrots Consumption on Stroke Mortality (follow-up median 20 years)</b>             |               |                       |                          |                       |                       |                         |                                      |                         |                        |                         |
| 1                                                                                      | observational | not serious           | not serious <sup>8</sup> | serious <sup>9</sup>  | not serious           | undetected <sup>1</sup> | dose-response gradient <sup>26</sup> | 1,034/9,766 (10.6%)     | 0.54 (0.48, 0.61)      | ⊕⊕○○<br><b>LOW</b>      |



| <b>Cruciferous Vegetables Consumption on Stroke Mortality (follow-up median 20 years)</b> |               |                       |                       |             |                       |                         |                                         |                         |                      |                         |
|-------------------------------------------------------------------------------------------|---------------|-----------------------|-----------------------|-------------|-----------------------|-------------------------|-----------------------------------------|-------------------------|----------------------|-------------------------|
| 5                                                                                         | observational | serious <sup>27</sup> | not serious           | not serious | serious <sup>28</sup> | undetected <sup>1</sup> | none                                    | 5,065/195,452<br>(2.6%) | 0.92<br>(0.85, 1.01) | ⊕○○○<br><b>VERY LOW</b> |
| <b>Green Leafy Vegetables Consumption on Stroke Mortality (follow-up median 21 years)</b> |               |                       |                       |             |                       |                         |                                         |                         |                      |                         |
| 4                                                                                         | observational | serious <sup>29</sup> | serious <sup>30</sup> | not serious | serious <sup>31</sup> | undetected <sup>1</sup> | dose-response<br>gradient <sup>32</sup> | 4,103/126,971<br>(3.2%) | 0.90<br>(0.83, 0.97) | ⊕⊕○○<br><b>LOW</b>      |
| <b>Tomatoes Consumption on Stroke Mortality (follow-up median 20 years)</b>               |               |                       |                       |             |                       |                         |                                         |                         |                      |                         |
| 2                                                                                         | observational | serious <sup>33</sup> | not serious           | not serious | serious <sup>33</sup> | undetected <sup>1</sup> | none <sup>34</sup>                      | 3,107/108,260<br>(2.9%) | 1.03<br>(0.94, 1.12) | ⊕○○○<br><b>VERY LOW</b> |

<sup>1</sup> No downgrade for publication bias as publication bias could not be assessed due to lack of power for assessing funnel plot asymmetry and small study effects (i.e. <10 observations available).

<sup>2</sup> Upgrade for a dose-response gradient, as the GLST analysis revealed a significant linear inverse relationship between fruit and vegetable intake and stroke mortality (p=0.005).

<sup>3</sup> Downgrade for serious inconsistency as there was evidence of substantial inter-study heterogeneity (I<sup>2</sup>=75%, p<0.00001) which could not be explained by sensitivity analyses.

<sup>4</sup> Upgrade for a dose-response gradient, as the GLST analysis revealed a significant linear inverse relationship between fruit intake and stroke mortality (p<0.001) and an MKSPLINE analysis revealed a significant non-linear inverse relationship between fruit intake and stroke mortality (p<0.001)

<sup>5</sup> Downgrade for serious inconsistency given evidence of substantial inter-study heterogeneity (I<sup>2</sup>=62%, p=0.0010). Although the removal of Wang et al. 2013 (I<sup>2</sup>=43%, p=0.05) or Leanders et al. 2014 (I<sup>2</sup>=48%, p=0.02) during sensitivity analysis did partially explain the heterogeneity, the presence of residual heterogeneity could not be excluded.

<sup>6</sup> Downgrade for serious imprecision, as the lower bound of the 95% CI (RR, 0.90) includes the MID of 5% while the upper bound of the 95% CI (RR, 0.99) crosses the MID.

<sup>7</sup> Upgrade for a dose-response gradient, as the GLST analysis revealed a significant linear inverse relationship between vegetable intake and stroke mortality (p=0.025).

<sup>8</sup> No downgrade for inconsistency as analyses for inconsistency could not be performed due to <2 observations available.

<sup>9</sup> Downgrade for serious indirectness as evidence is based on 1 male cohort and may not be generalizable to different populations

<sup>10</sup> Downgrade for serious imprecision, as the lower and upper bound of the 95% CIs (RR, 0.70 to 1.54) includes both clinically important benefit (RR<0.95) and harm (RR≥1.05).

<sup>11</sup> Downgrade for serious indirectness as evidence is based on a predominately (76%) female population and may not be generalizable to different populations.

<sup>12</sup> Downgrade for serious imprecision, as the lower bound of the 95% CI (RR, 0.82) includes the MID of 5% while the upper bound of the 95% CI (RR, 1.15) crosses the MID.

<sup>13</sup> Downgrade for serious risk of bias as 75.3% of effect estimate is based on Iso et al. 2007, which presented with a high risk of bias (Newcastle-Ottawa Score: 5/9).

<sup>14</sup> Downgrade for serious inconsistency given evidence of substantial inter-study heterogeneity (I<sup>2</sup>=82%, p=0.0001). Although the removal of Wang et al. 2016 (I<sup>2</sup>=40%, p=0.17) during sensitivity analysis did partially explain the heterogeneity, the presence of residual heterogeneity could not be excluded.

<sup>15</sup> Upgrade for a dose-response gradient, as the GLST analysis revealed a significant linear inverse relationship between citrus fruit intake and stroke mortality (p<0.001).

<sup>16</sup> Downgrade for serious indirectness as evidence is based on one female population and may not be generalizable to different populations.

<sup>17</sup> Downgrade for serious imprecision, as the lower and upper bound of the 95% CIs (RR, 0.80 to 1.13) includes both clinically important benefit (RR<0.95) and harm (RR≥1.05).

<sup>18</sup> Downgrade for serious risk of bias as 62% of effect estimate is based on Iso et al. 2007, which presented with a high risk of bias (Newcastle-Ottawa Score: 5/9).

- <sup>19</sup> Upgrade for a dose-response gradient, as the GLST analysis revealed a significant linear inverse relationship between fruit juice intake and CHD mortality ( $p=0.002$ ). MKSPLINE analyses could not be conducted due to small sample size.
- <sup>20</sup> Downgrade for serious indirectness as evidence is based on a predominately (76%) female population and may not be generalizable to different populations.
- <sup>21</sup> Downgrade for serious imprecision, as the lower and upper bound of the 95% CIs (RR, 0.53 to 1.02) includes both clinically important benefit ( $RR<0.95$ ) and harm ( $RR\geq 1.05$ ).
- <sup>22</sup> Downgrade for serious indirectness as evidence is based on a predominately (87%) female population and may not be generalizable to different populations.
- <sup>23</sup> Downgrade for serious imprecision, as the lower bound of the 95% CI (RR, 0.77) includes the MID of 5% while the upper bound of the 95% CI (RR, 1.09) crosses the MID.
- <sup>24</sup> Downgrade for serious inconsistency given evidence of substantial inter-study heterogeneity ( $I^2=96\%$ ,  $p<0.00001$ ).
- <sup>25</sup> Downgrade for serious imprecision, as the lower and upper bound of the 95% CIs (RR, 0.79 to 1.24) includes both clinically important benefit ( $RR<0.95$ ) and harm ( $RR\geq 1.05$ ).
- <sup>26</sup> Upgrade for a dose-response gradient, as the GLST analysis revealed a significant linear inverse relationship between carrots intake and stroke mortality ( $p<0.001$ ).
- <sup>27</sup> Downgrade for serious risk of bias as 79.4% of effect estimate is based on Iso et al. 2007, which presented with a high risk of bias (Newcastle-Ottawa Score: 5/9).
- <sup>28</sup> Downgrade for serious imprecision, as the lower bound of the 95% CI (RR, 0.85) includes the MID of 5% while the upper bound of the 95% CI (RR, 1.01) crosses the MID.
- <sup>29</sup> Downgrade for serious risk of bias as 50.0% of effect estimate is based on Iso et al. 2007, which presented with a high risk of bias (Newcastle-Ottawa Score: 5/9).
- <sup>30</sup> Downgrade for serious inconsistency given evidence of substantial inter-study heterogeneity ( $I^2=50\%$ ,  $p=0.09$ ). Although the removal of Appleby et al. 2002 ( $I^2=36\%$ ,  $p=0.20$ ) or Wang et al. 2016 ( $I^2=25\%$ ,  $p=0.05$ ) during sensitivity analysis did partially explain the heterogeneity, the presence of residual heterogeneity could not be excluded.
- <sup>31</sup> Downgrade for serious imprecision, as the lower bound of the 95% CI (RR, 0.83) includes the MID of 5% while the upper bound of the 95% CI (RR, 0.97) crosses the MID.
- <sup>32</sup> Upgrade for a dose-response gradient, as the GLST analysis revealed a significant linear inverse relationship between green leafy vegetable intake and CHD mortality ( $p=0.032$ ). MKSPLINE analyses could not be conducted due to small sample size.
- <sup>33</sup> Downgrade for serious risk of bias as 60.4% of effect estimate is based on Iso et al. 2007, which presented with a high risk of bias (Newcastle-Ottawa Score: 5/9).
- <sup>34</sup> Downgrade for serious imprecision, as the lower bound of the 95% CI (RR, 0.94) includes the MID of 5% while the upper bound of the 95% CI (RR, 1.12) crosses the MID.
- <sup>35</sup> Dose-response gradient could not be assessed due to insufficient dose ranges available to determine the presence of a linear/non-linear dose response.

**Figure S1. Relation between total fruit and vegetable intake and cardiovascular disease incidence (highest vs. lowest level of intake).**

## TOTAL FRUIT AND VEGETABLES AND CARDIOVASCULAR DISEASE INCIDENCE

### A. Fixed Effects

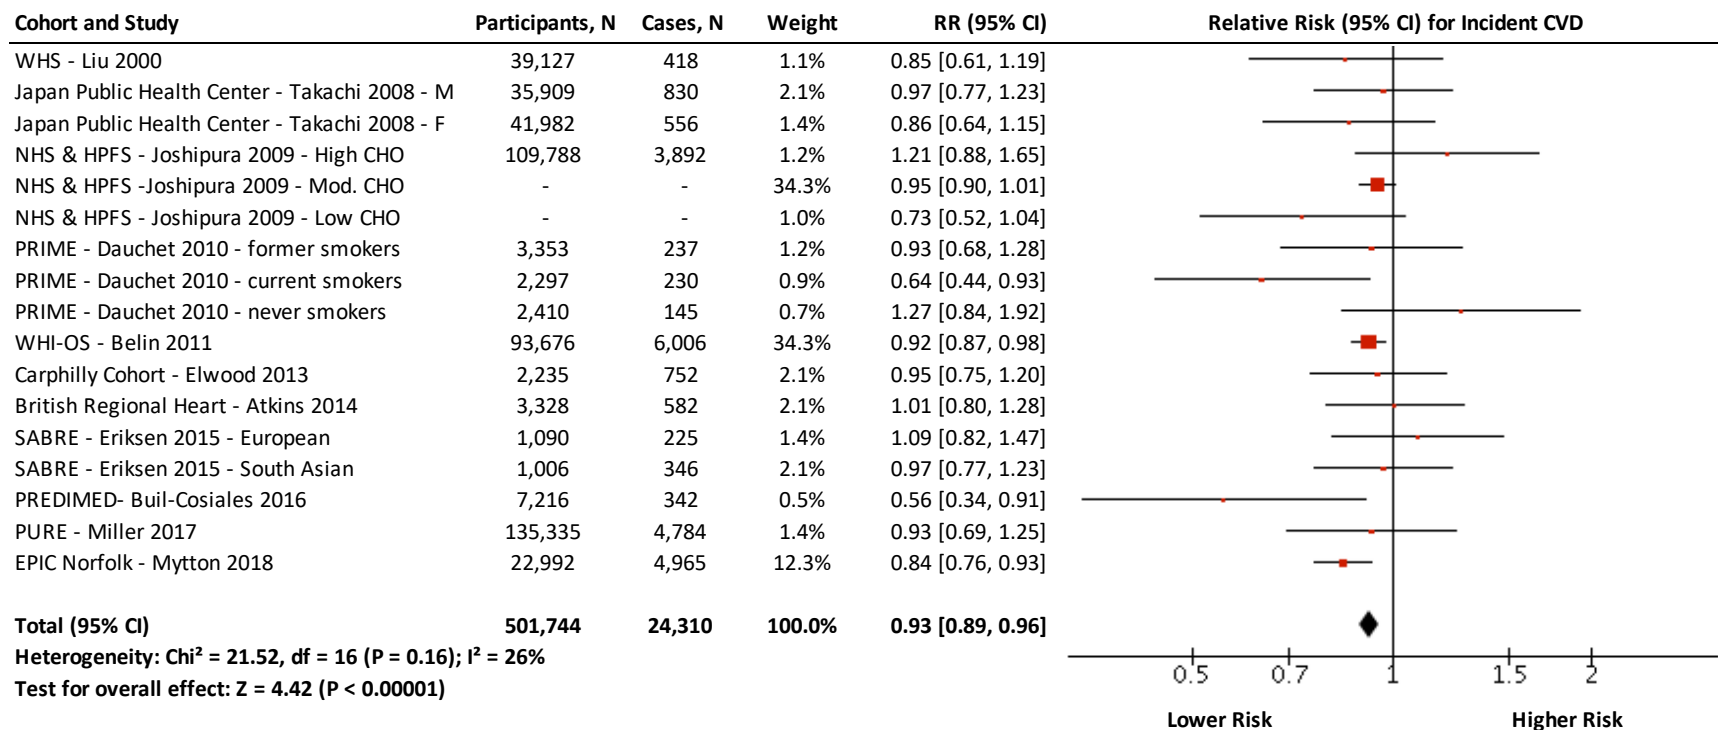

## B. Random Effects

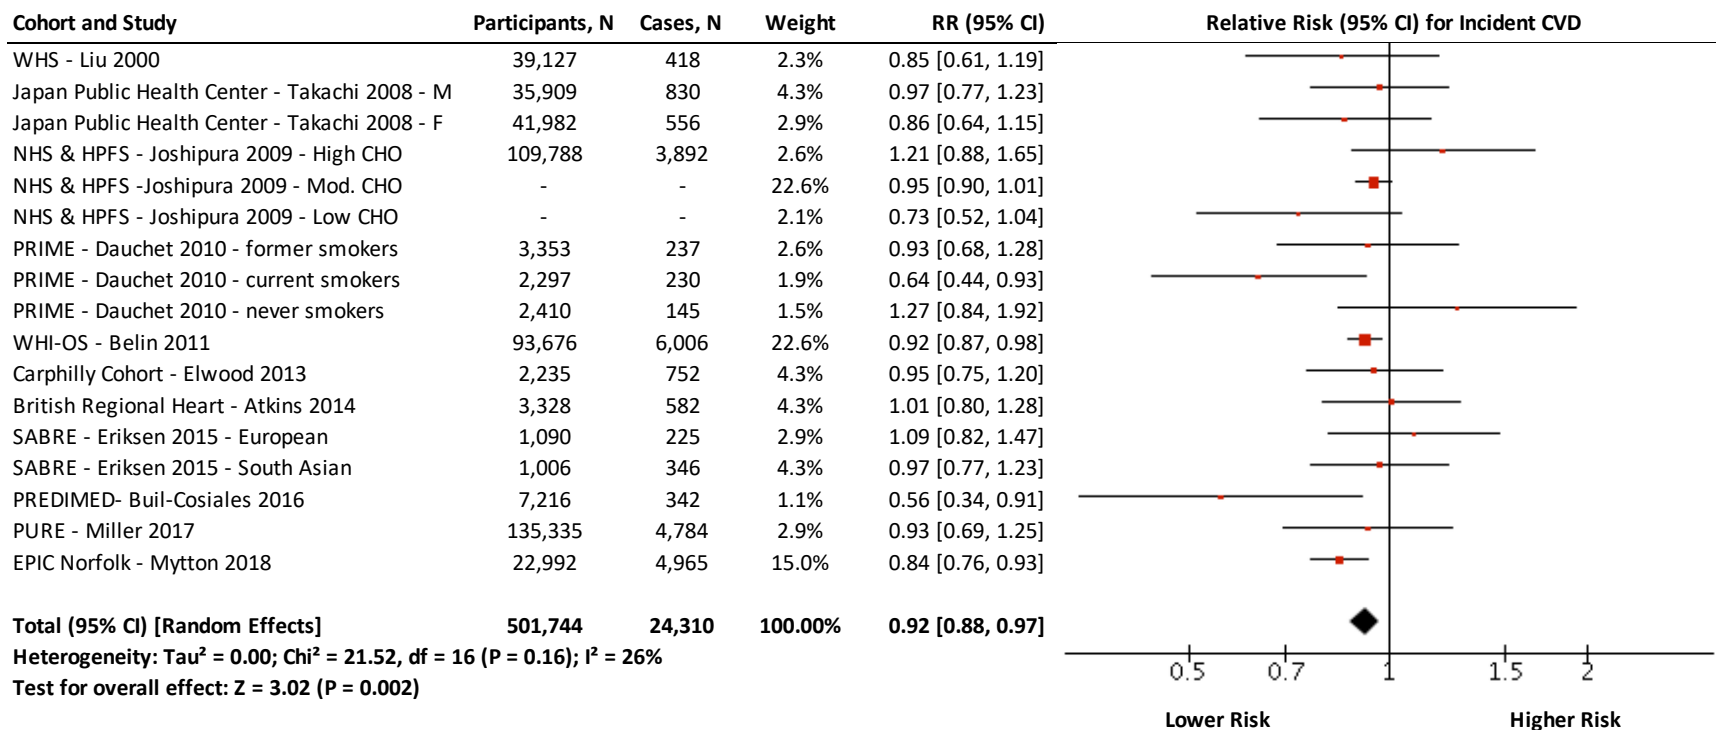

All results are presented as relative risk (RR) with 95% confidence intervals (95% CI). Pooled risk estimate is represented by the black diamond using (A) fixed effects and (B) random effects models. Inter-study heterogeneity was assessed using the Cochran Q statistic (Chi<sup>2</sup>) at a significance level of p<0.10, and quantified by I<sup>2</sup>, with values ≥ 50% indicating substantial heterogeneity.

## FRUIT AND CARDIOVASCULAR DISEASE INCIDENCE

### A. Fixed Effects

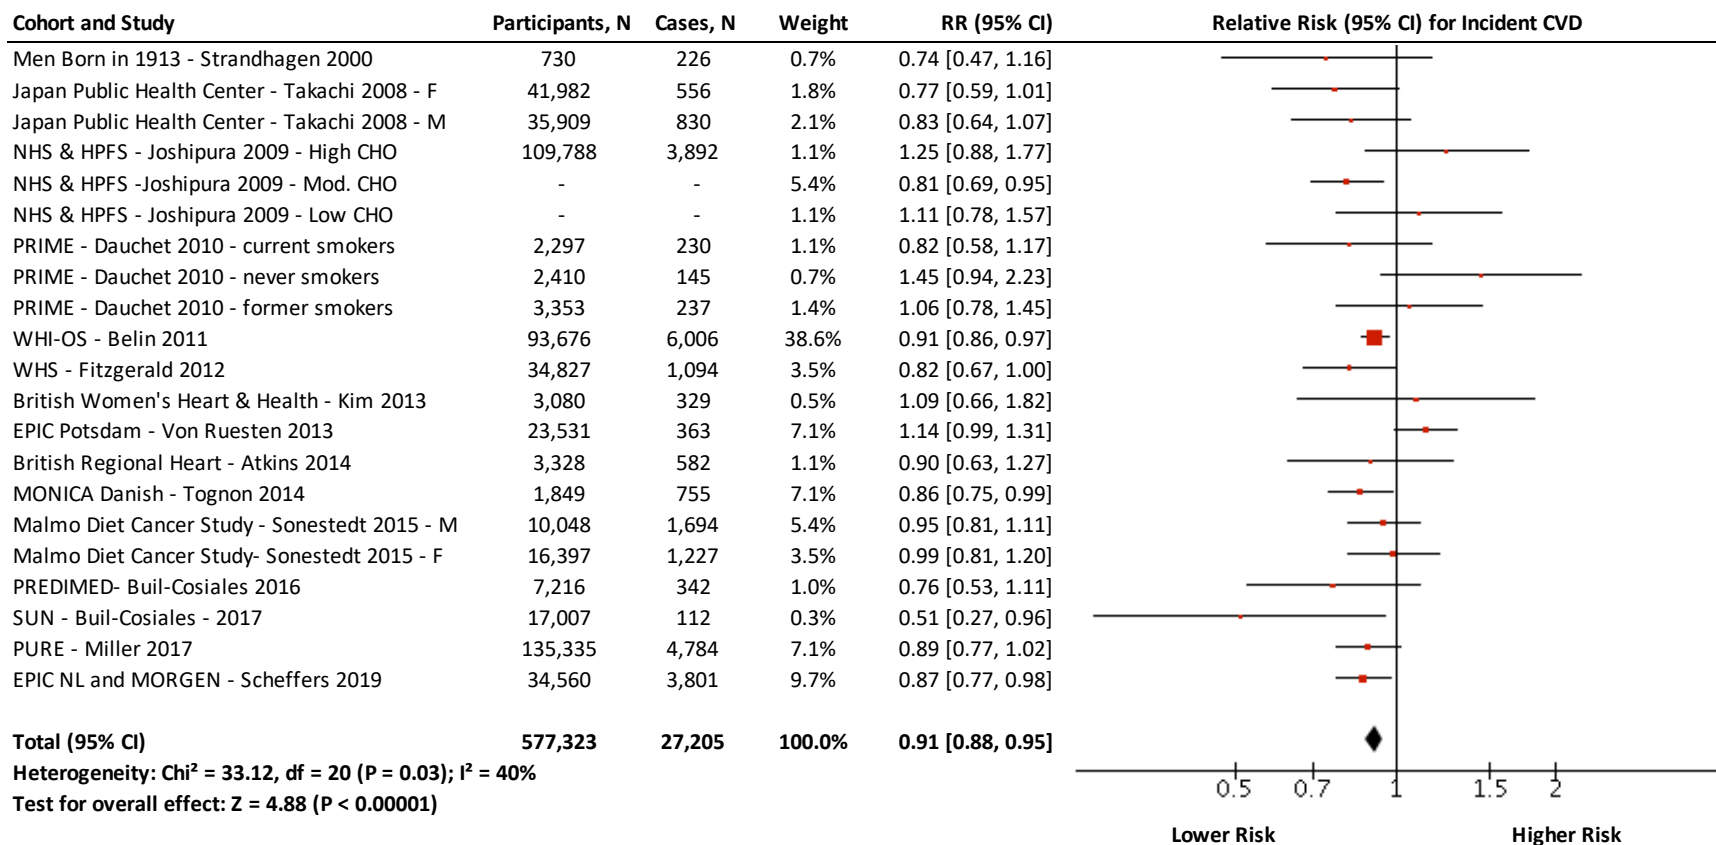

## B. Random Effects

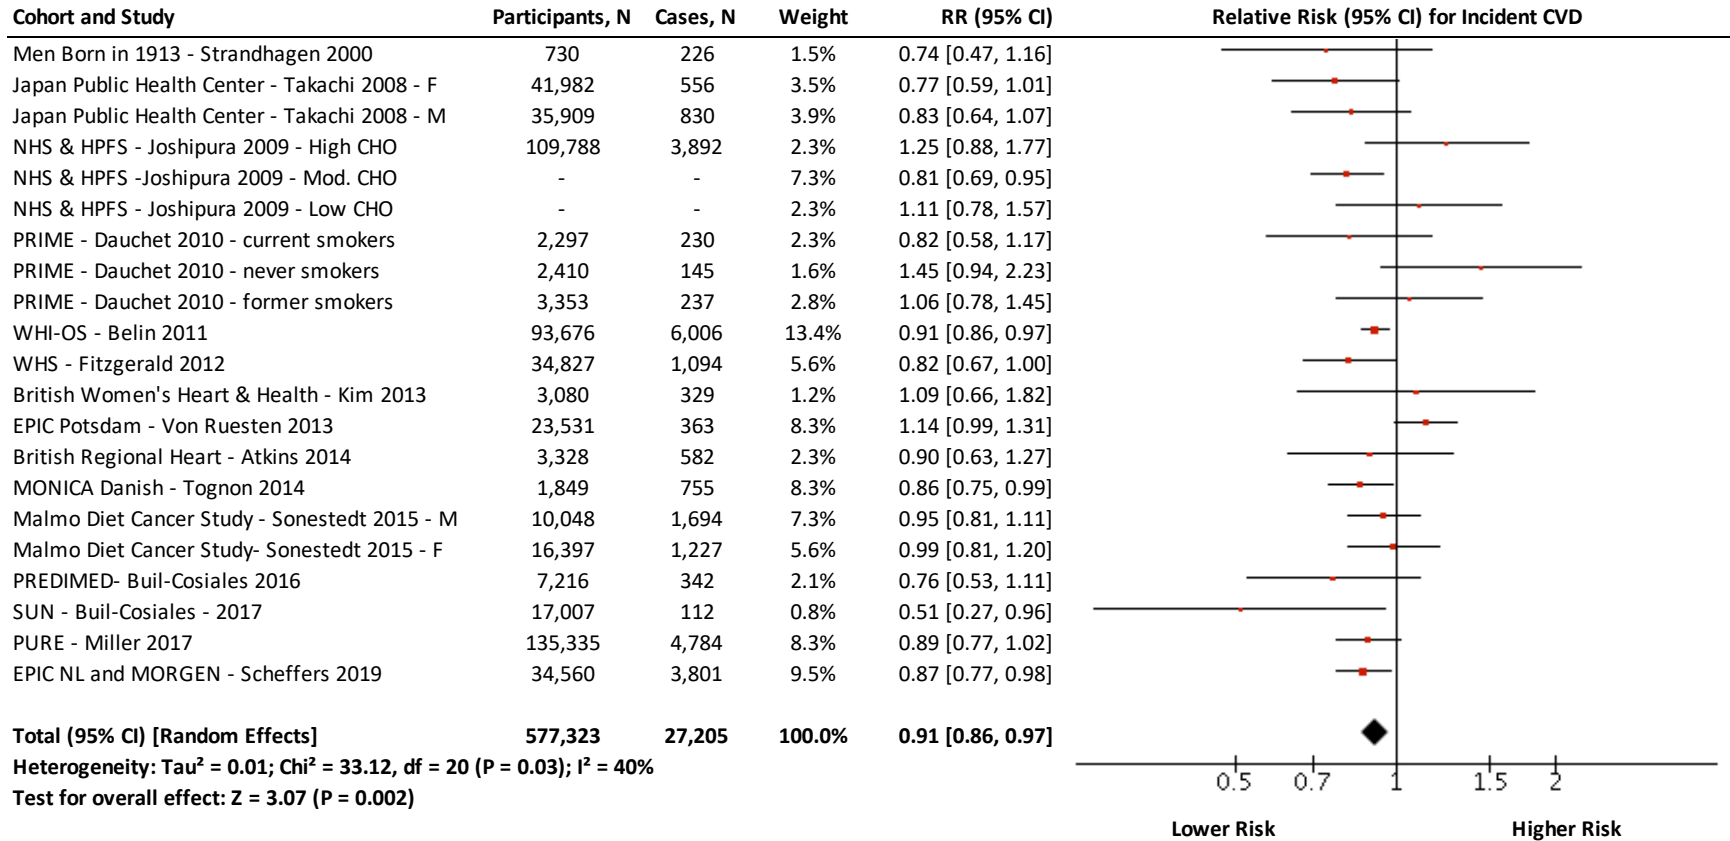

**Figure S2.** Relation between fruit intake and cardiovascular disease incidence (highest vs. lowest level of intake). All results are presented as relative risk (RR) with 95% confidence intervals (95% CI). Pooled risk estimate is represented by the black diamond using (A) fixed effects and (B) random effects models. Inter-study heterogeneity was assessed using the Cochran Q statistic ( $\chi^2$ ) at a significance level of  $p < 0.10$ , and quantified by  $I^2$ , with values  $\geq 50\%$  indicating substantial heterogeneity.

## VEGETABLES AND CARDIOVASCULAR DISEASE INCIDENCE

### A. Fixed Effects

| Cohort and Study                              | Participants, N | Cases, N      | Weight        | RR (95% CI)              | Relative Risk (95% CI) for Incident CVD |
|-----------------------------------------------|-----------------|---------------|---------------|--------------------------|-----------------------------------------|
| Men Born in 1913 - Strandhagen 2000           | 730             | 209           | 2.4%          | 0.77 [0.61, 0.98]        |                                         |
| Japan Public Health Center - Takachi 2008 - M | 35,909          | 582           | 2.9%          | 1.03 [0.83, 1.28]        |                                         |
| Japan Public Health Center - Takachi 2008 - F | 41,982          | 556           | 1.8%          | 0.88 [0.67, 1.16]        |                                         |
| NHS & HPFS - Josophura 2009 - High CHO        | 109,788         | 3,892         | 2.0%          | 0.96 [0.74, 1.24]        |                                         |
| NHS & HPFS - Josophura 2009 - Low CHO         | -               | -             | 2.0%          | 0.86 [0.67, 1.11]        |                                         |
| NHS & HPFS -Josophura 2009 - Mod. CHO         | -               | -             | 7.0%          | 0.93 [0.81, 1.07]        |                                         |
| PRIME - Dauchet 2010 - current smokers        | 2,297           | 230           | 5.4%          | 0.74 [0.63, 0.87]        |                                         |
| PRIME - Dauchet 2010 - former smokers         | 3,353           | 237           | 7.0%          | 1.04 [0.91, 1.19]        |                                         |
| PRIME - Dauchet 2010 - never smokers          | 2,410           | 145           | 4.3%          | 1.14 [0.95, 1.36]        |                                         |
| WHI-OS - Belin 2011                           | 93,676          | 6,006         | 38.4%         | 0.96 [0.91, 1.02]        |                                         |
| WHS - Fitzgerald 2012                         | 34,827          | 1,094         | 2.9%          | 0.89 [0.71, 1.10]        |                                         |
| EPIC Potsdam - Von Ruesten 2013               | 23,531          | 363           | 0.9%          | 0.70 [0.47, 1.03]        |                                         |
| MONICA Danish - Tognon 2014                   | 1,849           | 755           | 5.4%          | 0.88 [0.75, 1.03]        |                                         |
| British Regional Heart - Atkins 2014          | 3,328           | 582           | 0.5%          | 1.17 [0.69, 1.99]        |                                         |
| Malmo Diet Cancer Study - Sonestedt 2015 - M  | 10,048          | 1,694         | 5.4%          | 0.92 [0.79, 1.08]        |                                         |
| Malmo Diet Cancer Study- Sonestedt 2015 - F   | 16,397          | 1,227         | 3.5%          | 0.97 [0.80, 1.18]        |                                         |
| PREDIMED- Buil-Cosiales 2016                  | 7,216           | 342           | 1.0%          | 0.67 [0.46, 0.97]        |                                         |
| PURE - Miller 2017                            | 135,335         | 4,784         | 7.0%          | 0.95 [0.83, 1.09]        |                                         |
| SUN - Buil-Cosiales - 2017                    | 17,007          | 112           | 0.3%          | 0.96 [0.51, 1.80]        |                                         |
| <b>Total (95% CI)</b>                         | <b>539,683</b>  | <b>22,810</b> | <b>100.0%</b> | <b>0.94 [0.90, 0.97]</b> |                                         |

**Heterogeneity: Chi<sup>2</sup> = 27.44, df = 18 (P = 0.07); I<sup>2</sup> = 34%**  
**Test for overall effect: Z = 3.51 (P = 0.0004)**

## B. Random Effects

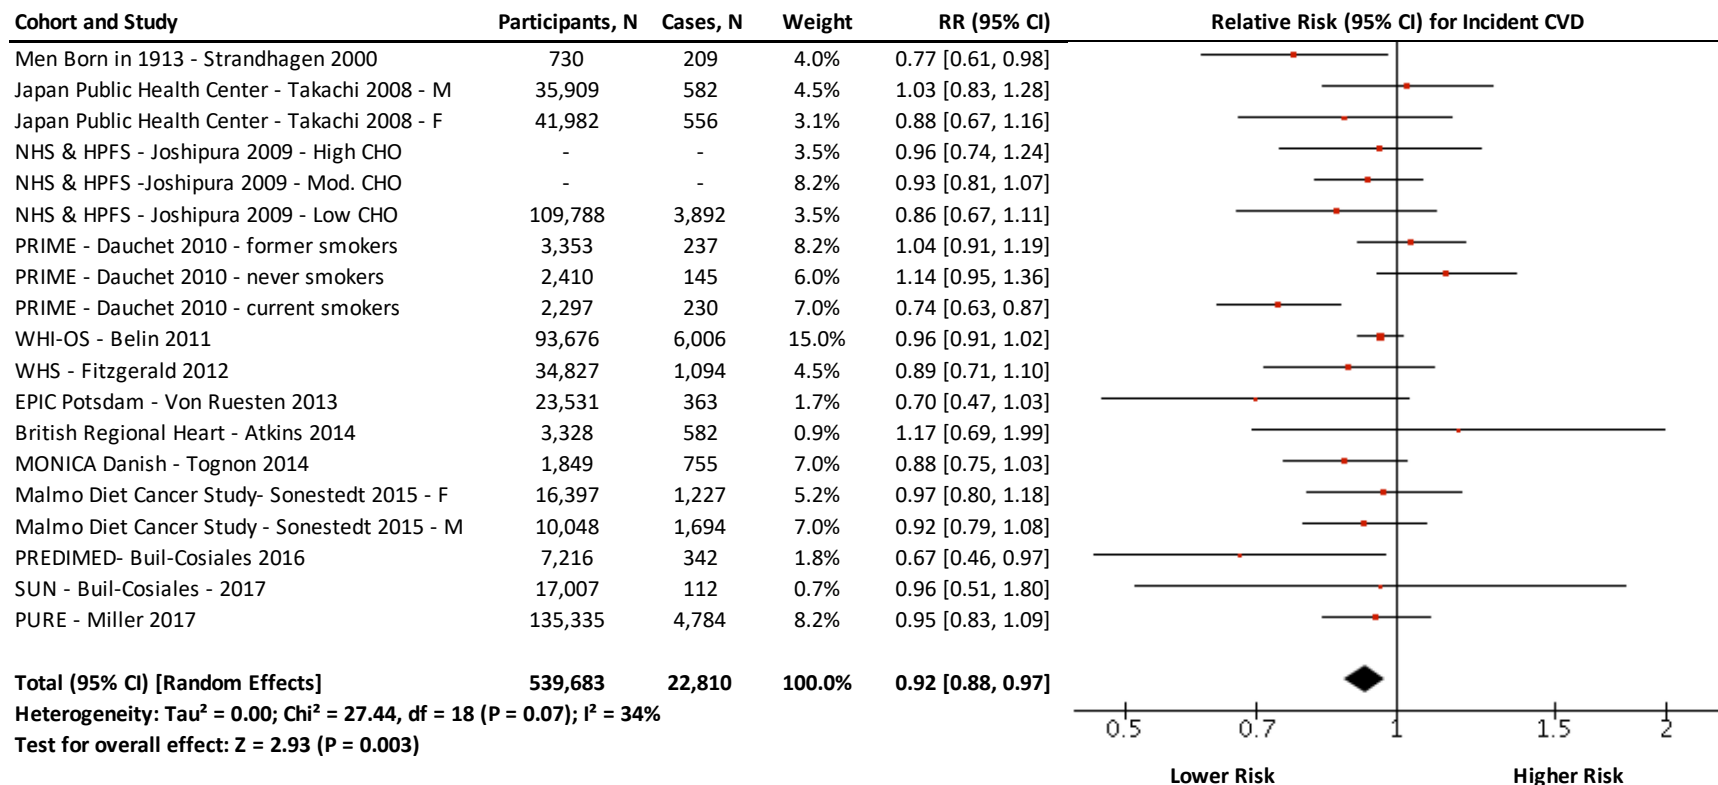

**Figure S3.** Relation between vegetable intake and cardiovascular disease incidence (highest vs. lowest level of intake). All results are presented as relative risk (RR) with 95% confidence intervals (95% CI). Pooled risk estimate is represented by the black diamond using (A) fixed effects and (B) random effects models. Inter-study heterogeneity was assessed using the Cochran Q statistic ( $\chi^2$ ) at a significance level of  $p < 0.10$ , and quantified by  $I^2$ , with values  $\geq 50\%$  indicating substantial heterogeneity.



### BERRIES AND CARDIOVASCULAR DISEASE INCIDENCE

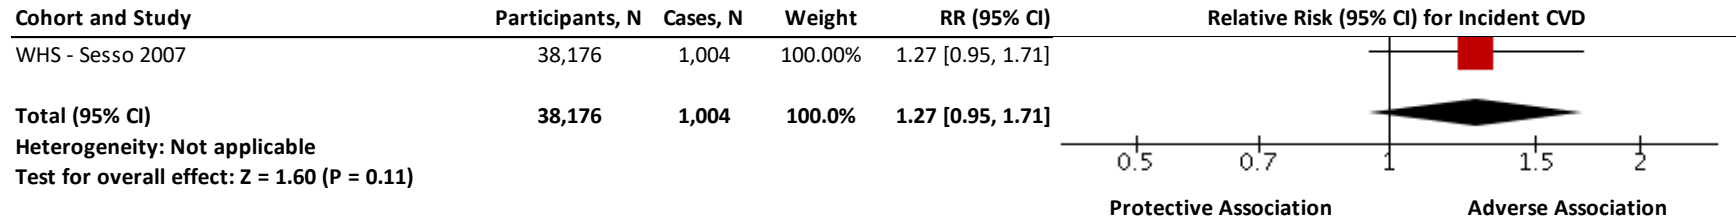

**Figure S4.** Relation between intake of berries and cardiovascular disease incidence (highest vs. lowest level of intake). All results are presented as relative risk (RR) with 95% confidence intervals (95% CI). Pooled risk estimate is represented by the black diamond. Inter-study heterogeneity was assessed using the Cochran Q statistic (Chi<sup>2</sup>) at a significance level of p<0.10, and quantified by I<sup>2</sup>, with values ≥ 50% indicating substantial heterogeneity.

## CITRUS FRUIT AND CARDIOVASCULAR DISEASE INCIDENCE

### A. Fixed Effects

| Cohort and Study                          | Participants, N | Cases, N     | Weight        | RR (95% CI)              |
|-------------------------------------------|-----------------|--------------|---------------|--------------------------|
| Japan Public Health Center - Takachi 2008 | 77,891          | 1,386        | 25.1%         | 0.80 [0.67, 0.96]        |
| NHS & HPFS -Joshiपुरa 2009 - Mod. CHO     | 109,788         | 3,892        | 41.5%         | 0.92 [0.80, 1.06]        |
| NHS & HPFS - Joshipura 2009 - Low CHO     | -               | -            | 7.9%          | 0.92 [0.67, 1.26]        |
| NHS & HPFS - Joshipura 2009 - High CHO    | -               | -            | 12.0%         | 1.05 [0.81, 1.36]        |
| Jidni Medical School - Yamada 2011 - F    | 6,476           | 218          | 2.6%          | 0.51 [0.30, 0.89]        |
| Jidni Medical School - Yamada 2011 - M    | 4,147           | 270          | 2.4%          | 0.57 [0.32, 1.01]        |
| PREDIMED- Buil-Cosiales 2016              | 7,216           | 342          | 6.3%          | 0.93 [0.66, 1.33]        |
| SUN - Buil-Cosiales - 2017                | 17,007          | 112          | 2.1%          | 0.65 [0.35, 1.19]        |
| <b>Total (95% CI) [Fixed Effects]</b>     | <b>222,525</b>  | <b>6,220</b> | <b>100.0%</b> | <b>0.88 [0.80, 0.96]</b> |

Heterogeneity:  $\text{Chi}^2 = 10.49$ ,  $\text{df} = 7$  ( $P = 0.16$ );  $I^2 = 33\%$   
 Test for overall effect:  $Z = 2.95$  ( $P = 0.003$ )

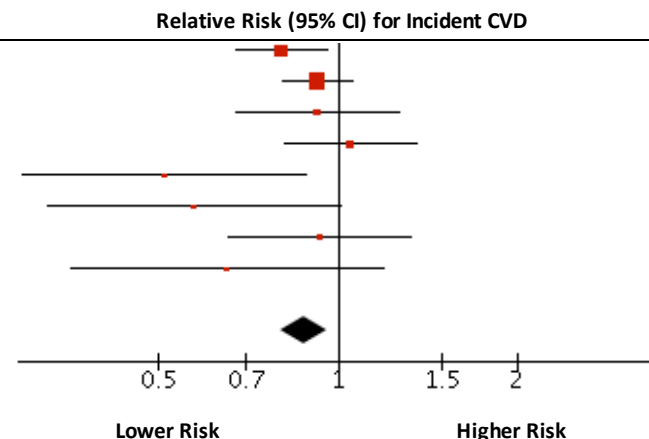

### B. Random Effects

| Cohort and Study                          | Participants, N | Cases, N     | Weight        | RR (95% CI)              |
|-------------------------------------------|-----------------|--------------|---------------|--------------------------|
| Japan Public Health Center - Takachi 2008 | 77,891          | 1,386        | 22.9%         | 0.80 [0.67, 0.96]        |
| NHS & HPFS - Joshipura 2009 - Low CHO     | 109,788         | 3,892        | 11.5%         | 0.92 [0.67, 1.26]        |
| NHS & HPFS -Joshiपुरa 2009 - Mod. CHO     | -               | -            | 27.9%         | 0.92 [0.80, 1.06]        |
| NHS & HPFS - Joshipura 2009 - High CHO    | -               | -            | 15.3%         | 1.05 [0.81, 1.36]        |
| Jidni Medical School - Yamada 2011 - M    | 4,147           | 270          | 4.3%          | 0.57 [0.32, 1.01]        |
| Jidni Medical School - Yamada 2011 - F    | 6,476           | 218          | 4.6%          | 0.51 [0.30, 0.89]        |
| PREDIMED- Buil-Cosiales 2016              | 7,216           | 342          | 9.6%          | 0.93 [0.66, 1.33]        |
| SUN - Buil-Cosiales - 2017                | 17,007          | 112          | 3.8%          | 0.65 [0.35, 1.19]        |
| <b>Total (95% CI) [Random Effects]</b>    | <b>222,525</b>  | <b>6,220</b> | <b>100.0%</b> | <b>0.86 [0.76, 0.97]</b> |

Heterogeneity:  $\text{Tau}^2 = 0.01$ ;  $\text{Chi}^2 = 10.49$ ,  $\text{df} = 7$  ( $P = 0.16$ );  $I^2 = 33\%$   
 Test for overall effect:  $Z = 2.40$  ( $P = 0.02$ )

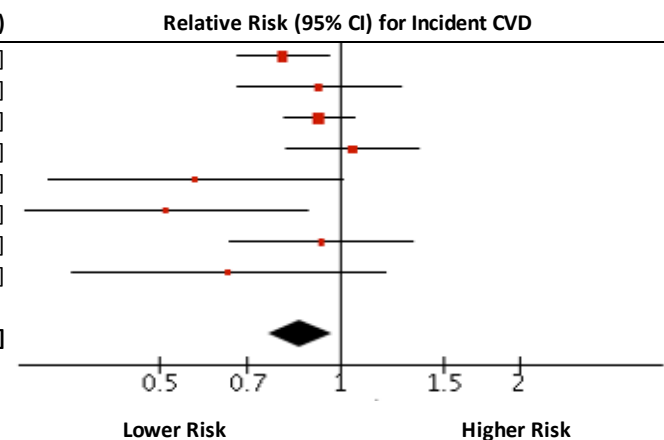

**Figure S5.** Relation between citrus fruit intake and cardiovascular disease incidence (highest vs. lowest level of intake). All results are presented as relative risk (RR) with 95% confidence intervals (95% CI). Pooled risk estimate is represented by the black diamond using (A) fixed effects and (B) random effects models. Inter-study heterogeneity was assessed using the Cochran Q statistic ( $\text{Chi}^2$ ) at a significance level of  $p < 0.10$ , and quantified by  $I^2$ , with values  $\geq 50\%$  indicating substantial heterogeneity.

## FRUIT JUICE AND CARDIOVASCULAR DISEASE INCIDENCE

### A. Fixed Effects

| Cohort and Study                       | Participants, N | Cases, N     | Weight        | RR (95% CI)              |
|----------------------------------------|-----------------|--------------|---------------|--------------------------|
| NHS & HPFS - Joshipura 2009 - High CHO | 109,788         | 3,892        | 8.0%          | 1.25 [0.97, 1.61]        |
| NHS & HPFS - Joshipura 2009 - Low CHO  | -               | -            | 6.0%          | 1.07 [0.80, 1.44]        |
| NHS & HPFS -Joshipura 2009 - Mod. CHO  | -               | -            | 37.5%         | 0.96 [0.85, 1.08]        |
| EPIC Potsdam - Von Ruesten 2013        | 23,531          | 363          | 21.1%         | 1.01 [0.86, 1.18]        |
| EPIC NL and MORGEN - Scheffers 2019    | 34,560          | 3,801        | 27.5%         | 0.96 [0.84, 1.10]        |
| <b>Total (95% CI)</b>                  | <b>167,879</b>  | <b>8,056</b> | <b>100.0%</b> | <b>1.00 [0.93, 1.07]</b> |

Heterogeneity:  $\text{Tau}^2 = 0.00$ ;  $\text{Chi}^2 = 3.86$ ,  $\text{df} = 4$  ( $P = 0.42$ );  $I^2 = 0\%$   
 Test for overall effect:  $Z = 0.06$  ( $P = 0.95$ )

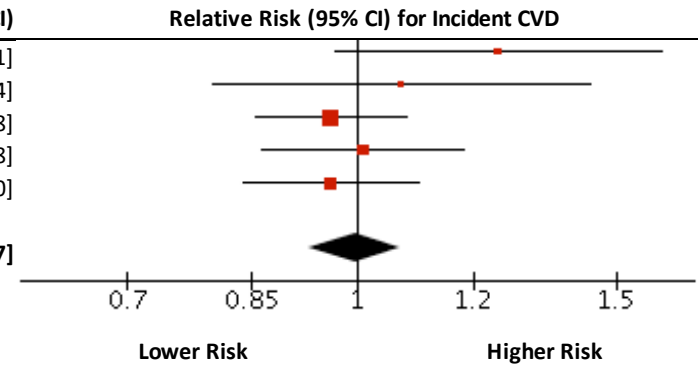

### B. Random Effects

| Cohort and Study                       | Participants, N | Cases, N     | Weight        | RR (95% CI)              |
|----------------------------------------|-----------------|--------------|---------------|--------------------------|
| NHS & HPFS - Joshipura 2009 - High CHO | 109,788         | 3,892        | 8.0%          | 1.25 [0.97, 1.61]        |
| NHS & HPFS - Joshipura 2009 - Low CHO  | -               | -            | 6.0%          | 1.07 [0.80, 1.44]        |
| NHS & HPFS -Joshipura 2009 - Mod. CHO  | -               | -            | 37.5%         | 0.96 [0.85, 1.08]        |
| EPIC Potsdam - Von Ruesten 2013        | 23,531          | 363          | 21.1%         | 1.01 [0.86, 1.18]        |
| EPIC NL and MORGEN - Scheffers 2019    | 34,560          | 3,801        | 27.5%         | 0.96 [0.84, 1.10]        |
| <b>Total (95% CI)</b>                  | <b>167,879</b>  | <b>8,056</b> | <b>100.0%</b> | <b>1.00 [0.93, 1.07]</b> |

Heterogeneity:  $\text{Tau}^2 = 0.00$ ;  $\text{Chi}^2 = 3.86$ ,  $\text{df} = 4$  ( $P = 0.42$ );  $I^2 = 0\%$   
 Test for overall effect:  $Z = 0.06$  ( $P = 0.95$ )

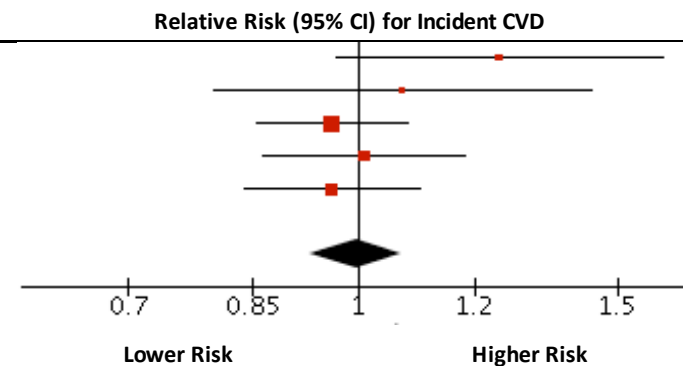

**Figure S6.** Relation between fruit juice intake and cardiovascular disease incidence (highest vs. lowest level of intake). All results are presented as relative risk (RR) with 95% confidence intervals (95% CI). Pooled risk estimate is represented by the black diamond using (A) fixed effects and (B) random effects models. Inter-study heterogeneity was assessed using the Cochran Q statistic ( $\text{Chi}^2$ ) at a significance level of  $p < 0.10$ , and quantified by  $I^2$ , with values  $\geq 50\%$  indicating substantial heterogeneity.

## POMMES AND CARDIOVASCULAR DISEASE INCIDENCE

### A. Fixed Effects

| Cohort and Study                          | Participants, N | Cases, N     | Weight        | RR (95% CI)              |
|-------------------------------------------|-----------------|--------------|---------------|--------------------------|
| WHS - Sesso 2003 (a)                      | 38,176          | 1,004        | 14.5%         | 0.78 [0.53, 1.15]        |
| Framingham Offspring Study - Jacques 2015 | 2,880           | 518          | 14.5%         | 0.74 [0.50, 1.10]        |
| PREDIMED- Buil-Cosiales 2016              | 7,216           | 342          | 16.1%         | 0.70 [0.48, 1.01]        |
| SUN - Buil-Cosiales - 2017                | 17,007          | 112          | 6.9%          | 0.65 [0.37, 1.15]        |
| NutriNet-Sante - Adriouch 2018            | 84,158          | 602          | 48.0%         | 0.80 [0.65, 1.00]        |
| <b>Total (95% CI)</b>                     | <b>149,437</b>  | <b>2,578</b> | <b>100.0%</b> | <b>0.76 [0.66, 0.88]</b> |

Heterogeneity:  $\text{Chi}^2 = 0.77$ ,  $\text{df} = 4$  ( $P = 0.94$ );  $I^2 = 0\%$   
 Test for overall effect:  $Z = 3.58$  ( $P = 0.0003$ )

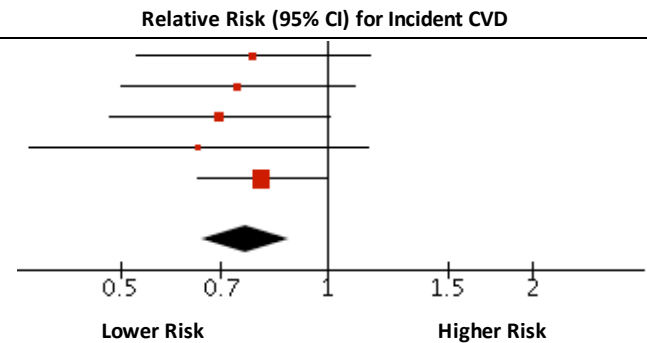

### B. Random Effects

| Cohort and Study                          | Participants, N | Cases, N     | Weight        | RR (95% CI)              |
|-------------------------------------------|-----------------|--------------|---------------|--------------------------|
| WHS - Sesso 2003 (a)                      | 38,176          | 1,004        | 14.5%         | 0.78 [0.53, 1.15]        |
| Framingham Offspring Study - Jacques 2015 | 2,880           | 518          | 14.5%         | 0.74 [0.50, 1.10]        |
| PREDIMED- Buil-Cosiales 2016              | 7,216           | 342          | 16.1%         | 0.70 [0.48, 1.01]        |
| SUN - Buil-Cosiales - 2017                | 17,007          | 112          | 6.9%          | 0.65 [0.37, 1.15]        |
| NutriNet-Sante - Adriouch 2018            | 84,158          | 602          | 48.0%         | 0.80 [0.65, 1.00]        |
| <b>Total (95% CI) [Random Effects]</b>    | <b>149,437</b>  | <b>2,578</b> | <b>100.0%</b> | <b>0.76 [0.66, 0.88]</b> |

Heterogeneity:  $\text{Tau}^2 = 0.00$ ;  $\text{Chi}^2 = 0.77$ ,  $\text{df} = 4$  ( $P = 0.94$ );  $I^2 = 0\%$   
 Test for overall effect:  $Z = 3.58$  ( $P = 0.0003$ )

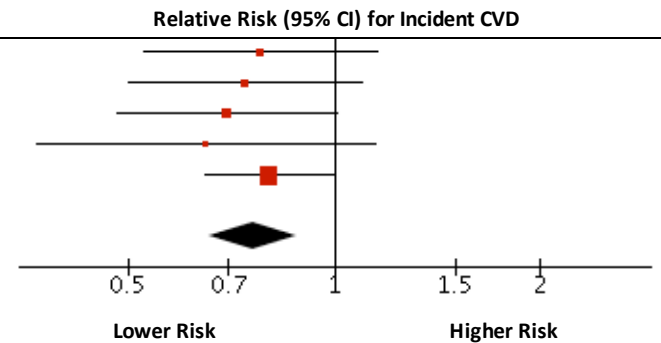

**Figure S7.** Relation between pommes intake and cardiovascular disease incidence (highest vs. lowest level of intake). All results are presented as relative risk (RR) with 95% confidence intervals (95% CI). Pooled risk estimate is represented by the black diamond using (A) fixed effects and (B) random effects models. Inter-study heterogeneity was assessed using the Cochran Q statistic ( $\text{Chi}^2$ ) at a significance level of  $p < 0.10$ , and quantified by  $I^2$ , with values  $\geq 50\%$  indicating substantial heterogeneity.

## ALLIUM VEGETABLES AND CARDIOVASCULAR DISEASE INCIDENCE

### A. Fixed Effects

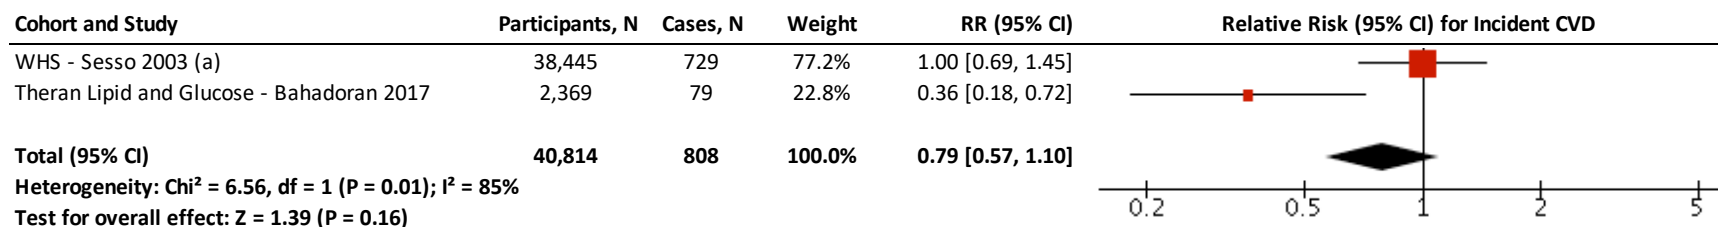

### B. Random Effects

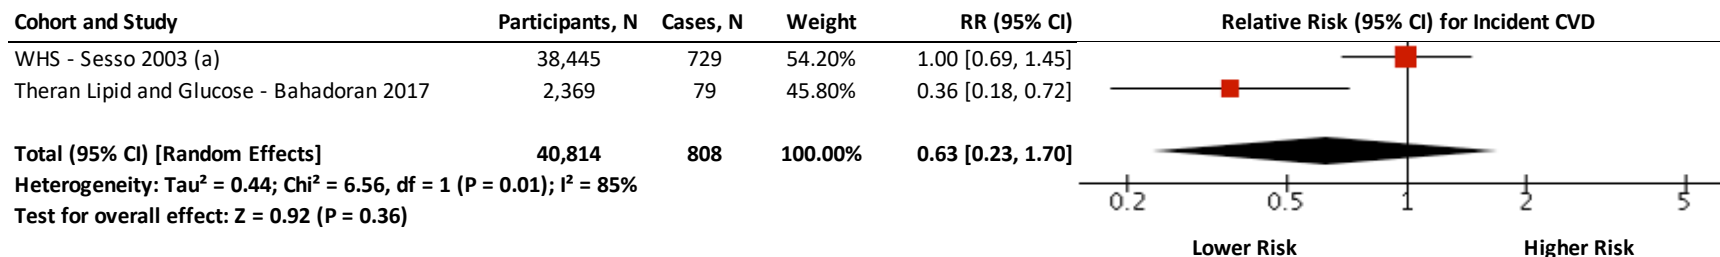

**Figure S8.** Relation between intake of allium vegetables and cardiovascular disease incidence (highest vs. lowest level of intake). All results are presented as relative risk (RR) with 95% confidence intervals (95% CI). Pooled risk estimate is represented by the black diamond using (A) fixed effects and (B) random effects models. Inter-study heterogeneity was assessed using the Cochran Q statistic ( $\text{Chi}^2$ ) at a significance level of  $p < 0.10$ , and quantified by  $I^2$ , with values  $\geq 50\%$  indicating substantial heterogeneity.

## CRUCIFEROUS VEGETABLES AND CARDIOVASCULAR DISEASE INCIDENCE

### A. Fixed Effects

| Cohort and Study                          | Participants, N | Cases, N     | Weight        | RR (95% CI)              |
|-------------------------------------------|-----------------|--------------|---------------|--------------------------|
| WHS - Sesso 2003 (a)                      | 38,445          | 729          | 3.5%          | 0.71 [0.44, 1.16]        |
| Japan Public Health Center - Takachi 2008 | 77,891          | 1,386        | 34.4%         | 1.11 [0.94, 1.29]        |
| NHS & HPFS - Joshipura 2009 - Low CHO     | 109,788         | 3,892        | 15.3%         | 1.05 [0.83, 1.33]        |
| NHS & HPFS - Joshipura 2009 - High CHO    | -               | -            | 15.3%         | 0.89 [0.70, 1.12]        |
| NHS & HPFS -Joshipura 2009 - Mod. CHO     | -               | -            | 22.0%         | 1.05 [0.86, 1.28]        |
| EPIC Potsdam - Von Ruesten 2013           | 23,531          | 363          | 1.4%          | 1.36 [0.62, 2.99]        |
| PREDIMED- Buil-Cosiales 2016              | 7,216           | 342          | 6.1%          | 0.62 [0.43, 0.90]        |
| SUN - Buil-Cosiales - 2017                | 17,007          | 112          | 1.9%          | 0.56 [0.29, 1.09]        |
| <b>Total (95% CI)</b>                     | <b>273,878</b>  | <b>6,824</b> | <b>100.0%</b> | <b>0.99 [0.90, 1.08]</b> |

Heterogeneity:  $\text{Chi}^2 = 14.65$ ,  $\text{df} = 7$  ( $P = 0.04$ );  $I^2 = 52\%$   
 Test for overall effect:  $Z = 0.28$  ( $P = 0.78$ )

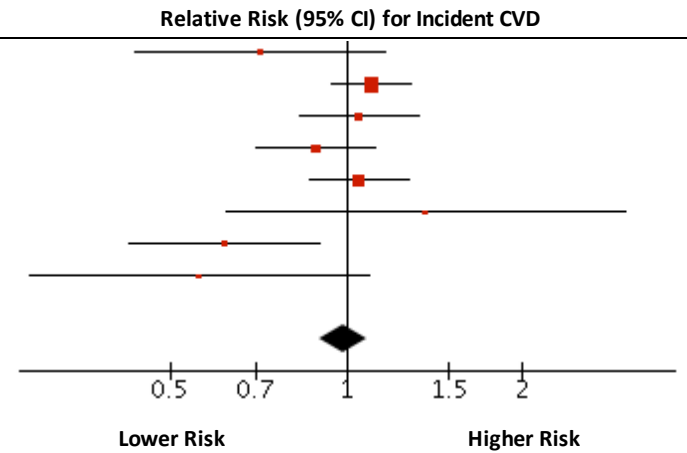

### B. Random Effects

| Cohort and Study                          | Participants, N | Cases, N     | Weight        | RR (95% CI)              |
|-------------------------------------------|-----------------|--------------|---------------|--------------------------|
| WHS - Sesso 2003 (a)                      | 38,445          | 729          | 7.2%          | 0.71 [0.44, 1.16]        |
| Japan Public Health Center - Takachi 2008 | 77,891          | 1,386        | 21.7%         | 1.11 [0.94, 1.29]        |
| NHS & HPFS - Joshipura 2009 - High CHO    | -               | -            | 16.8%         | 0.89 [0.70, 1.12]        |
| NHS & HPFS -Joshipura 2009 - Mod. CHO     | -               | -            | 19.2%         | 1.05 [0.86, 1.28]        |
| NHS & HPFS - Joshipura 2009 - Low CHO     | 109,788         | 3,892        | 16.8%         | 1.05 [0.83, 1.33]        |
| EPIC Potsdam - Von Ruesten 2013           | 23,531          | 363          | 3.3%          | 1.36 [0.62, 2.99]        |
| PREDIMED- Buil-Cosiales 2016              | 7,216           | 342          | 10.5%         | 0.62 [0.43, 0.90]        |
| SUN - Buil-Cosiales - 2017                | 17,007          | 112          | 4.4%          | 0.56 [0.29, 1.09]        |
| <b>Total (95% CI) [Random Effects]</b>    | <b>273,878</b>  | <b>6,824</b> | <b>100.0%</b> | <b>0.93 [0.80, 1.09]</b> |

Heterogeneity:  $\text{Tau}^2 = 0.02$ ;  $\text{Chi}^2 = 14.65$ ,  $\text{df} = 7$  ( $P = 0.04$ );  $I^2 = 52\%$   
 Test for overall effect:  $Z = 0.91$  ( $P = 0.36$ )

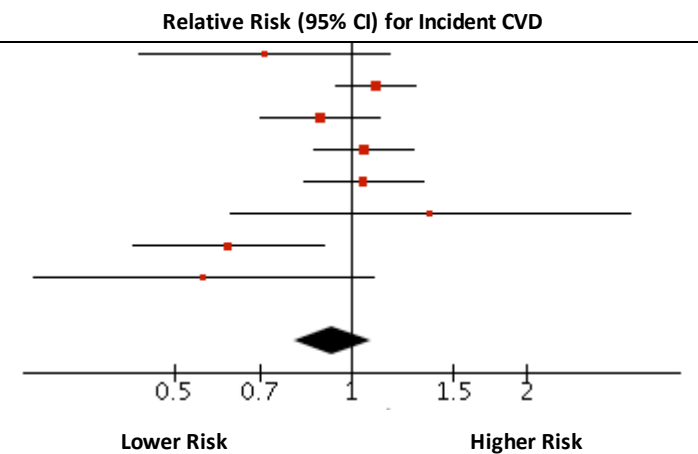

**Figure S9.** Relation between intake of cruciferous vegetables and cardiovascular disease incidence (highest vs. lowest level of intake). All results are presented as relative risk (RR) with 95% confidence intervals (95% CI). Pooled risk estimate is represented by the black diamond using (A) fixed effects and (B) random effects models. Inter-study heterogeneity was assessed using the Cochran Q statistic ( $\text{Chi}^2$ ) at a significance level of  $p < 0.10$ , and quantified by  $I^2$ , with values  $\geq 50\%$  indicating substantial heterogeneity.

## GREEN LEAFY VEGETABLES AND CARDIOVASCULAR DISEASE INCIDENCE

### A. Fixed Effects

| Cohort and Study                          | Participants, N | Cases, N     | Weight        | RR (95% CI)              |
|-------------------------------------------|-----------------|--------------|---------------|--------------------------|
| Japan Public Health Center - Takachi 2008 | 77,891          | 1,386        | 24.7%         | 1.04 [0.87, 1.24]        |
| NHS & HPFS - Joshipura 2009 - High CHO    | 109,788         | 3,892        | 11.8%         | 0.92 [0.72, 1.19]        |
| NHS & HPFS -Joshipura 2009 - Low. CHO     | -               | -            | 13.9%         | 0.76 [0.60, 0.97]        |
| NHS & HPFS -Joshipura 2009 - Mod. CHO     | -               | -            | 40.8%         | 0.85 [0.74, 0.98]        |
| PREDIMED- Buil-Cosiales 2016              | 7,216           | 342          | 6.9%          | 0.65 [0.47, 0.91]        |
| SUN - Buil-Cosiales - 2017                | 17,007          | 112          | 2.0%          | 1.05 [0.56, 1.97]        |
| <b>Total (95% CI)</b>                     | <b>211,902</b>  | <b>5,732</b> | <b>100.0%</b> | <b>0.87 [0.76, 0.99]</b> |

Heterogeneity:  $\text{Chi}^2 = 8.69$ ,  $\text{df} = 5$  ( $P = 0.12$ );  $I^2 = 42\%$   
 Test for overall effect:  $Z = 2.93$  ( $P = 0.003$ )

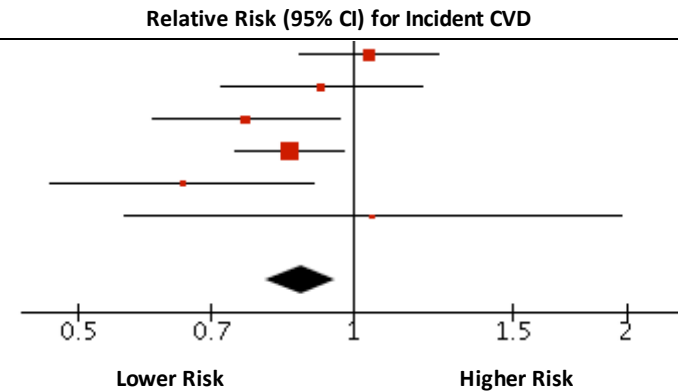

### B. Random Effects

| Cohort and Study                          | Participants, N | Cases, N     | Weight        | RR (95% CI)              |
|-------------------------------------------|-----------------|--------------|---------------|--------------------------|
| Japan Public Health Center - Takachi 2008 | 77,891          | 1,386        | 24.7%         | 1.04 [0.87, 1.24]        |
| NHS & HPFS - Joshipura 2009 - High CHO    | 109,788         | 3,892        | 11.8%         | 0.92 [0.72, 1.19]        |
| NHS & HPFS -Joshipura 2009 - Low. CHO     | -               | -            | 13.9%         | 0.76 [0.60, 0.97]        |
| NHS & HPFS -Joshipura 2009 - Mod. CHO     | -               | -            | 40.8%         | 0.85 [0.74, 0.98]        |
| PREDIMED- Buil-Cosiales 2016              | 7,216           | 342          | 6.9%          | 0.65 [0.47, 0.91]        |
| SUN - Buil-Cosiales - 2017                | 17,007          | 112          | 2.0%          | 1.05 [0.56, 1.97]        |
| <b>Total (95% CI)</b>                     | <b>211,902</b>  | <b>5,732</b> | <b>100.0%</b> | <b>0.87 [0.76, 0.99]</b> |

Heterogeneity:  $\text{Tau}^2 = 0.01$ ;  $\text{Chi}^2 = 8.69$ ,  $\text{df} = 5$  ( $P = 0.12$ );  $I^2 = 42\%$   
 Test for overall effect:  $Z = 2.16$  ( $P = 0.03$ )

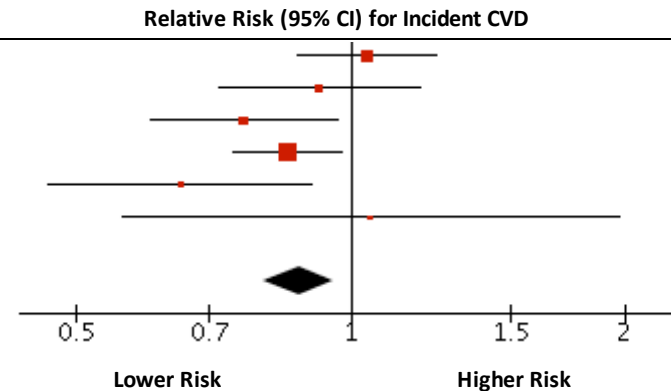

**Figure S10.** Relation between intake of green leafy vegetables and cardiovascular disease incidence (highest vs. lowest level of intake). All results are presented as relative risk (RR) with 95% confidence intervals (95% CI). Pooled risk estimate is represented by the black diamond using (A) fixed effects and (B) random effects models. Inter-study heterogeneity was assessed using the Cochran Q statistic ( $\text{Chi}^2$ ) at a significance level of  $p < 0.10$ , and quantified by  $I^2$ , with values  $\geq 50\%$  indicating substantial heterogeneity.

## TOMATOES AND CARDIOVASCULAR DISEASE INCIDENCE

### A. Fixed Effects

| Cohort and Study                             | Participants, N | Cases, N   | Weight        | RR (95% CI)              |
|----------------------------------------------|-----------------|------------|---------------|--------------------------|
| WHS - Sesso 2003 (b) - tomatoes              | 38,445          | 729        | 22.7%         | 1.03 [0.66, 1.62]        |
| WHS - Sesso 2003 (b) - tomato juice          | -               | -          | 47.0%         | 0.71 [0.43, 1.18]        |
| WHS - Sesso 2003 (b) - tomato based products | -               | -          | 17.8%         | 1.14 [0.83, 1.56]        |
| SUN - Buil-Cosiales - 2017                   | 17,007          | 112        | 12.5%         | 0.73 [0.40, 1.35]        |
| <b>Total (95% CI)</b>                        | <b>55,452</b>   | <b>841</b> | <b>100.0%</b> | <b>0.97 [0.78, 1.20]</b> |

Heterogeneity:  $\text{Chi}^2 = 3.31$ ,  $\text{df} = 3$  ( $P = 0.35$ );  $I^2 = 9\%$   
 Test for overall effect:  $Z = 0.29$  ( $P = 0.77$ )

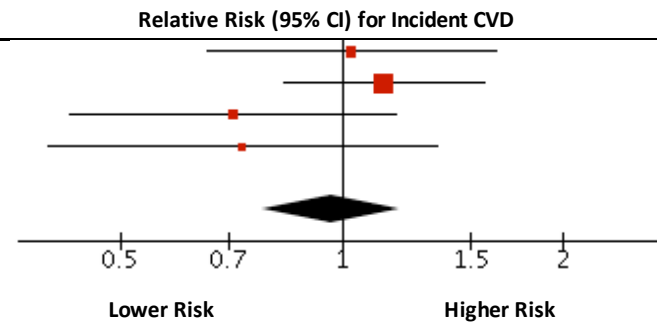

### B. Random Effects

| Cohort and Study                             | Participants, N | Cases, N   | Weight        | RR (95% CI)              |
|----------------------------------------------|-----------------|------------|---------------|--------------------------|
| WHS - Sesso 2003 (b) - tomatoes              | 38,445          | 729        | 23.5%         | 1.03 [0.66, 1.62]        |
| WHS - Sesso 2003 (b) - tomato based products | -               | -          | 18.8%         | 0.71 [0.43, 1.18]        |
| WHS - Sesso 2003 (b) - tomato juice          | -               | -          | 44.2%         | 1.14 [0.83, 1.56]        |
| SUN - Buil-Cosiales - 2017                   | 17,007          | 112        | 13.5%         | 0.73 [0.40, 1.35]        |
| <b>Total (95% CI) [Random Effects]</b>       | <b>55,452</b>   | <b>841</b> | <b>100.0%</b> | <b>0.96 [0.76, 1.21]</b> |

Heterogeneity:  $\text{Tau}^2 = 0.01$ ;  $\text{Chi}^2 = 3.31$ ,  $\text{df} = 3$  ( $P = 0.35$ );  $I^2 = 9\%$   
 Test for overall effect:  $Z = 0.35$  ( $P = 0.73$ )

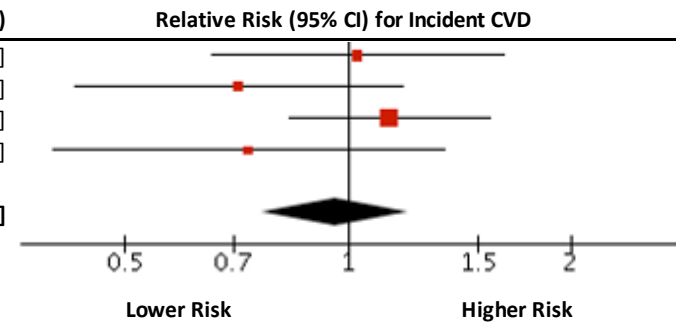

**Figure S11.** Relation between tomato intake and cardiovascular disease incidence (highest vs. lowest level of intake). All results are presented as relative risk (RR) with 95% confidence intervals (95% CI). Pooled risk estimate is represented by the black diamond using (A) fixed effects and (B) random effects models. Inter-study heterogeneity was assessed using the Cochran Q statistic ( $\text{Chi}^2$ ) at a significance level of  $p < 0.10$ , and quantified by  $I^2$ , with values  $\geq 50\%$  indicating substantial heterogeneity.



## A. Fixed Effects

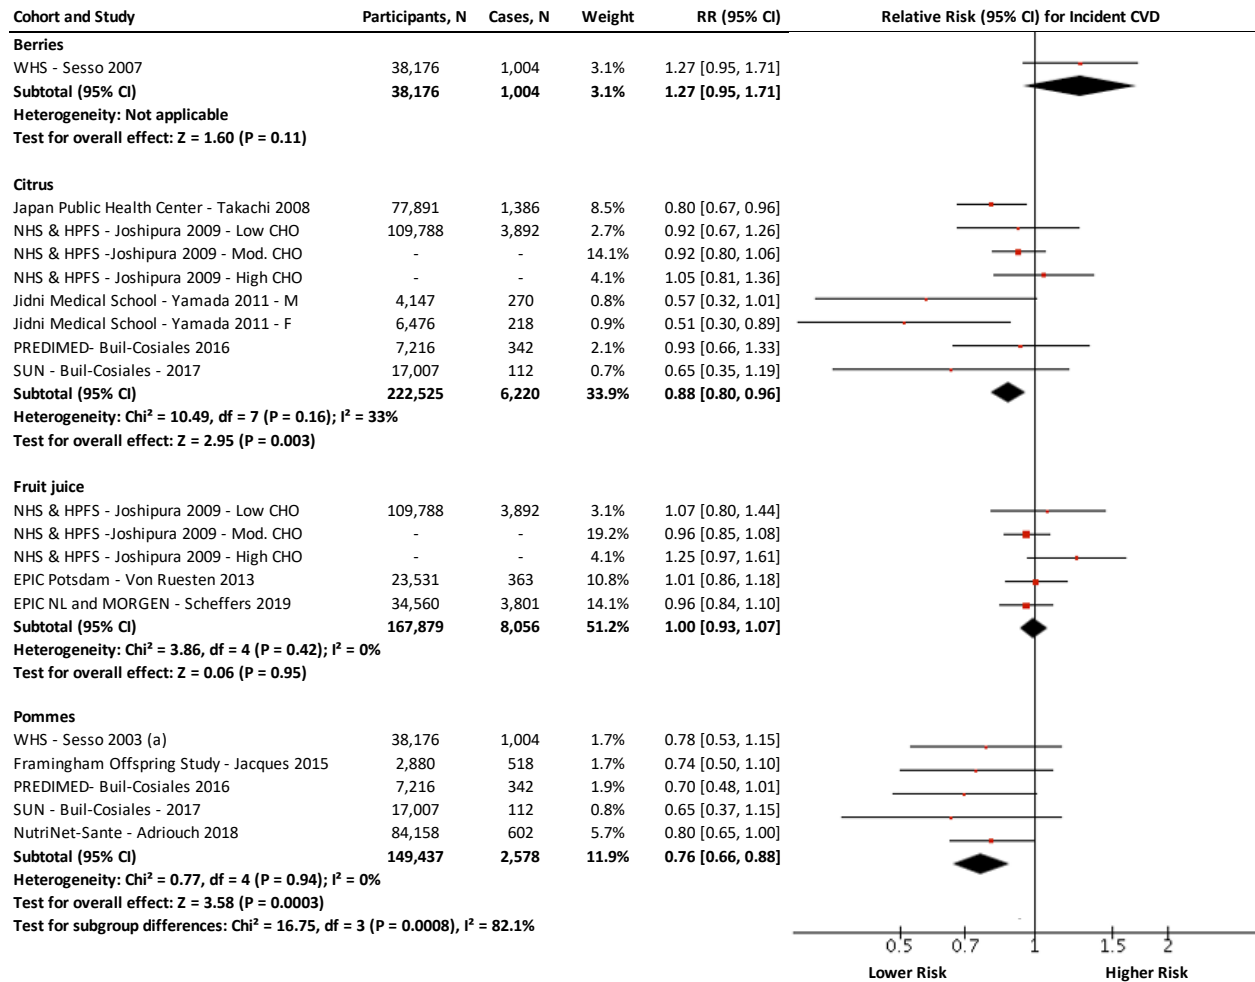

## B. Random Effects

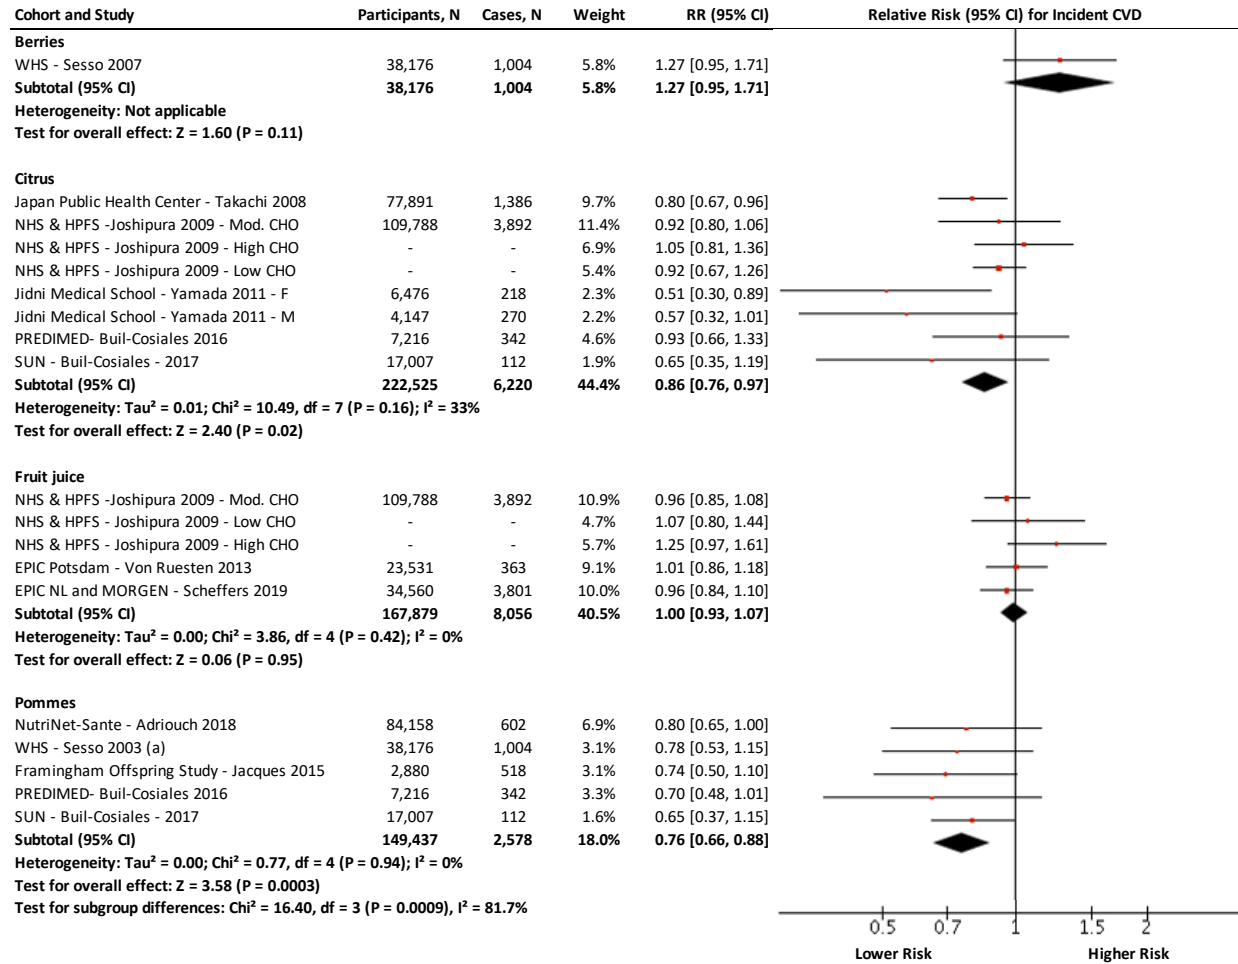

**Figure S12.** Relation between sources of fruit and CVD incidence (highest vs. lowest level of intake). All results are presented as relative risk (RR) with 95% confidence intervals (95% CI). Pooled risk estimate is represented by the black diamond using (A) fixed effects and (B) random effects models. Inter-study heterogeneity was assessed using the Cochran Q statistic (Chi<sup>2</sup>) at a significance level of p<0.10, and quantified by I<sup>2</sup>, with values ≥ 50% indicating substantial heterogeneity.

## A. Fixed Effects

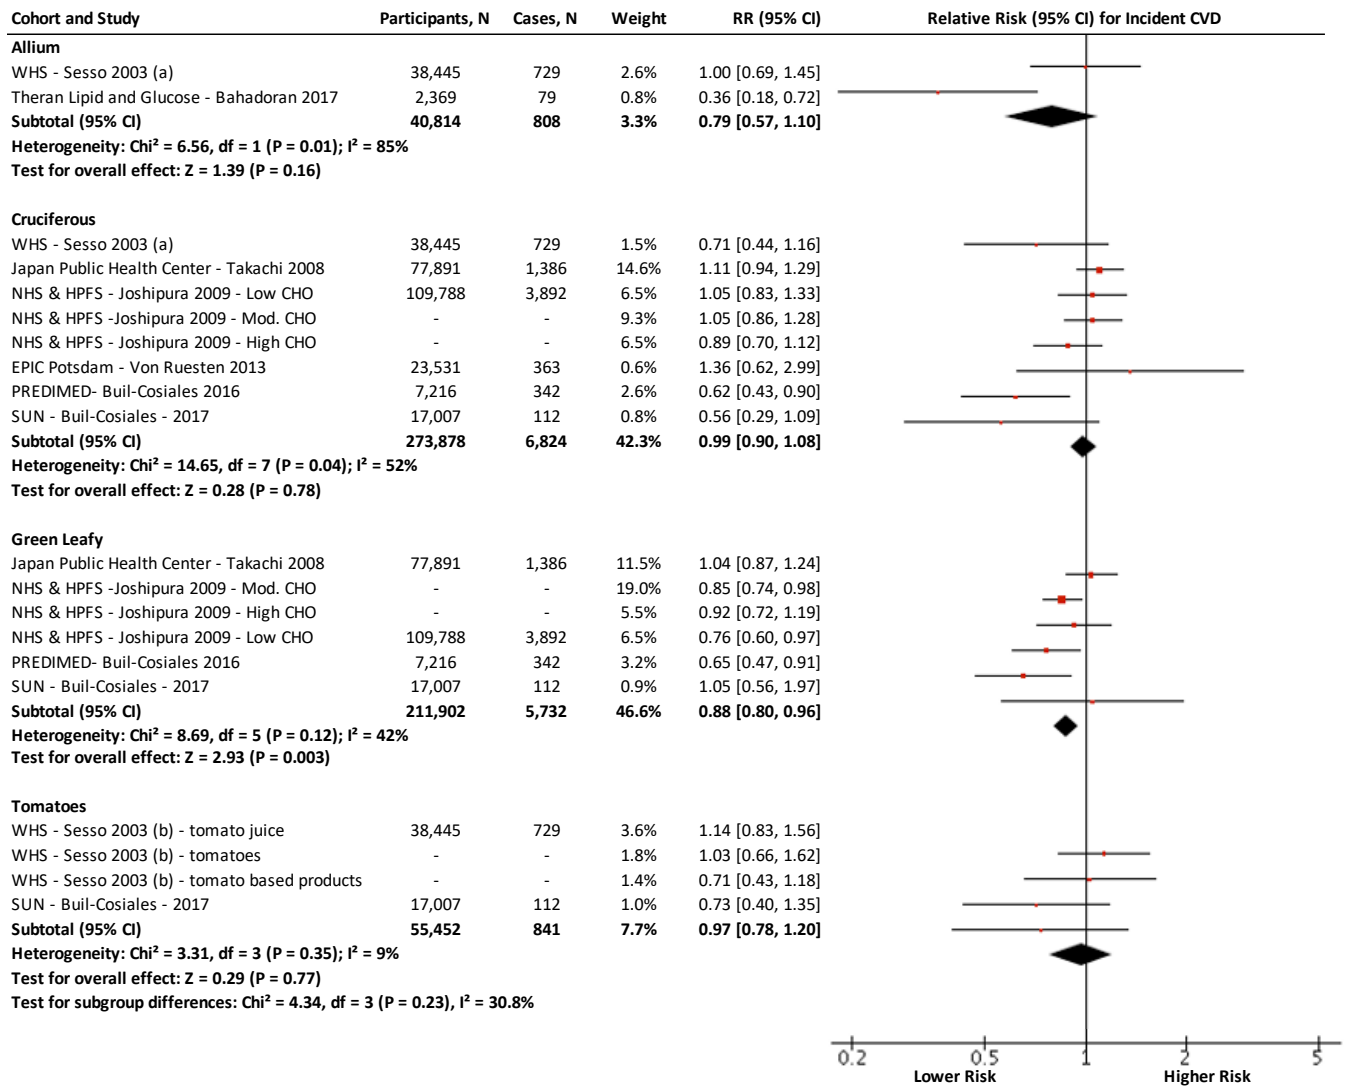

## B. Random Effects

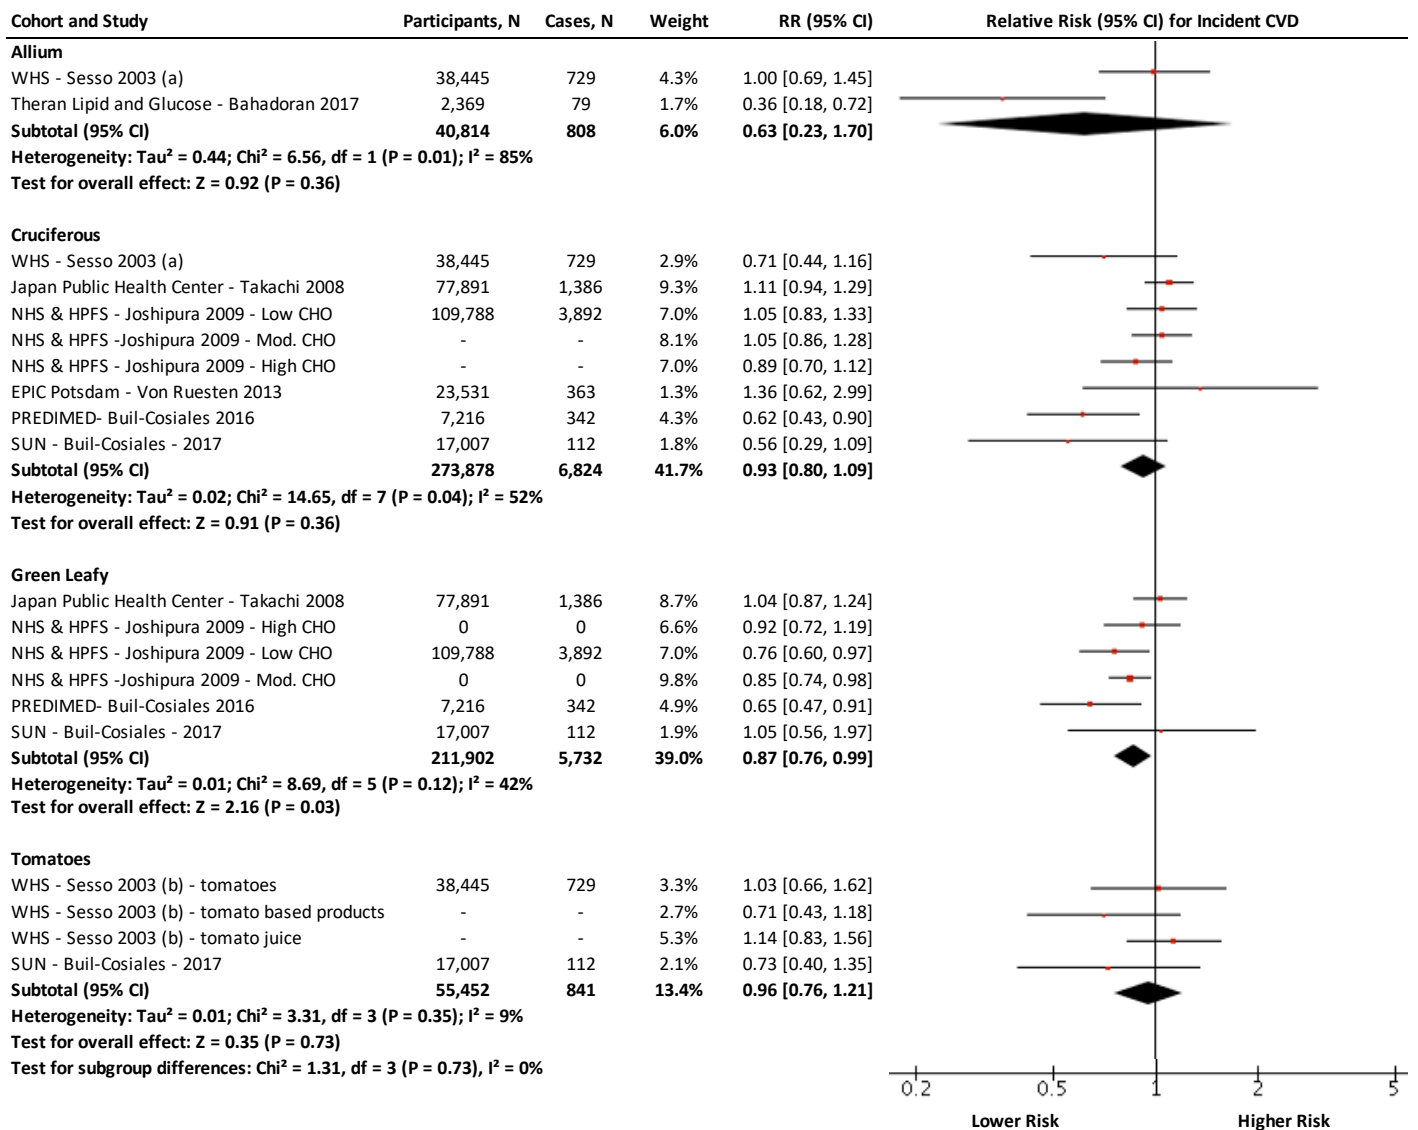

**Figure S13.** Relation between sources of vegetables and CVD incidence (highest vs. lowest level of intake). All results are presented as relative risk (RR) with 95% confidence intervals (95% CI). Pooled risk estimate is represented by the black diamond using (A) fixed effects and (B) random effects models. Inter-study heterogeneity was assessed using the Cochran Q statistic (Chi<sup>2</sup>) at a significance level of p<0.10, and quantified by I<sup>2</sup>, with values ≥ 50% indicating substantial heterogeneity.

## TOTAL FRUIT AND VEGETABLES AND CARDIOVASCULAR DISEASE MORTALITY

### A. Fixed Effects

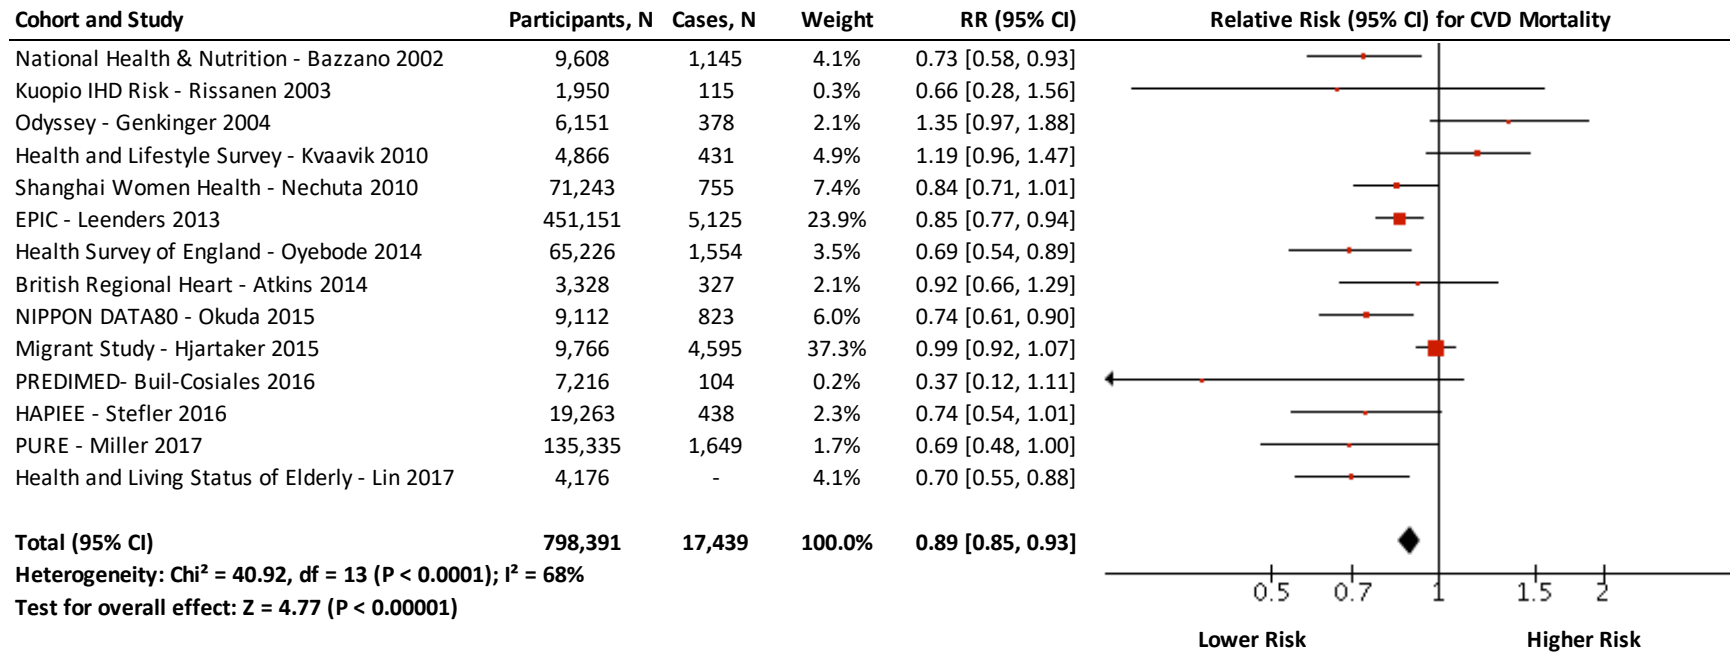

## B. Random Effects

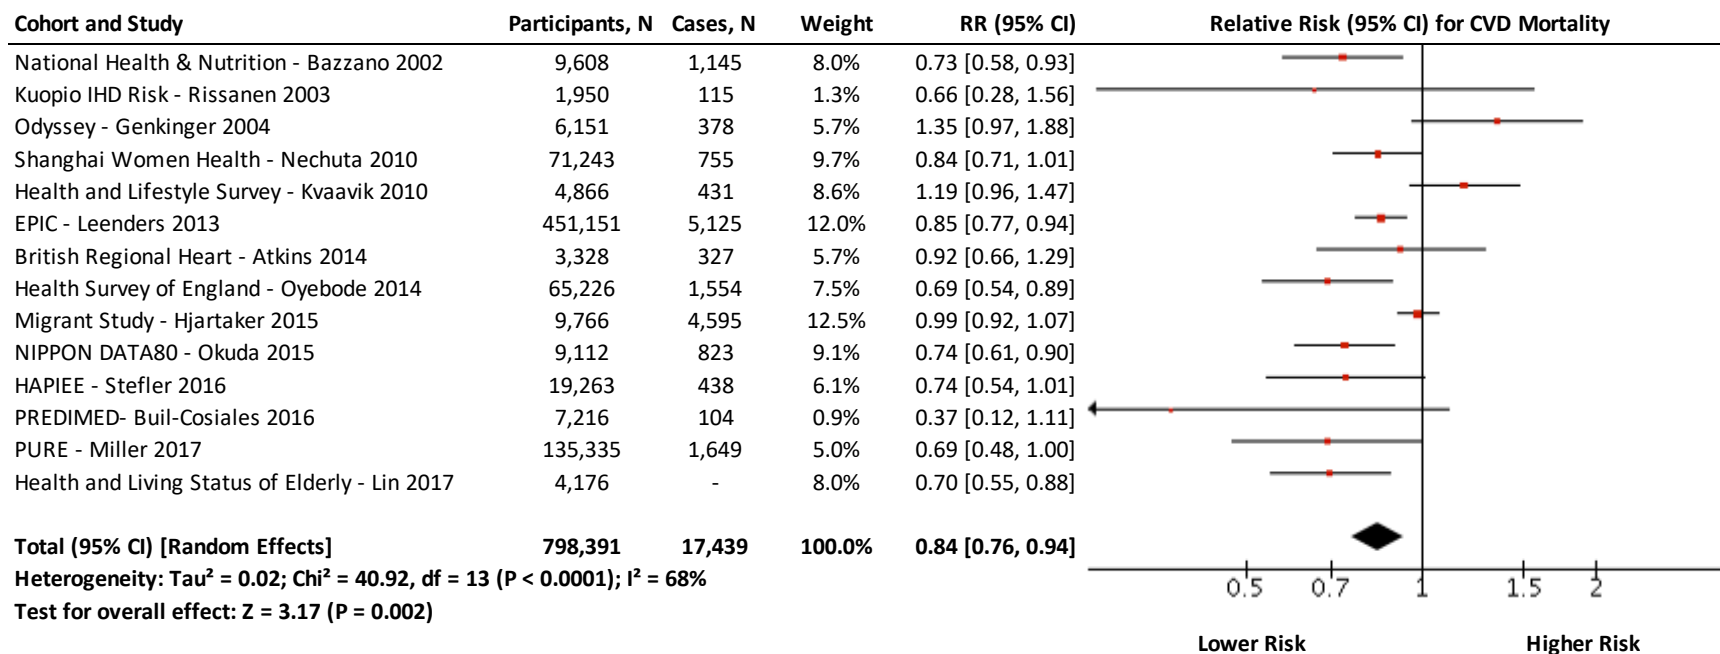

**Figure S14.** Relation between total fruit and vegetable intake and cardiovascular disease mortality (highest vs. lowest level of intake). All results are presented as relative risk (RR) with 95% confidence intervals (95% CI). Pooled risk estimate is represented by the black diamond using (A) fixed effects and (B) random effects models. Inter-study heterogeneity was assessed using the Cochran Q statistic (Chi<sup>2</sup>) at a significance level of p<0.10, and quantified by I<sup>2</sup>, with values ≥ 50% indicating substantial heterogeneity.

## FRUIT AND CARDIOVASCULAR DISEASE MORTALITY

### A. Fixed Effects

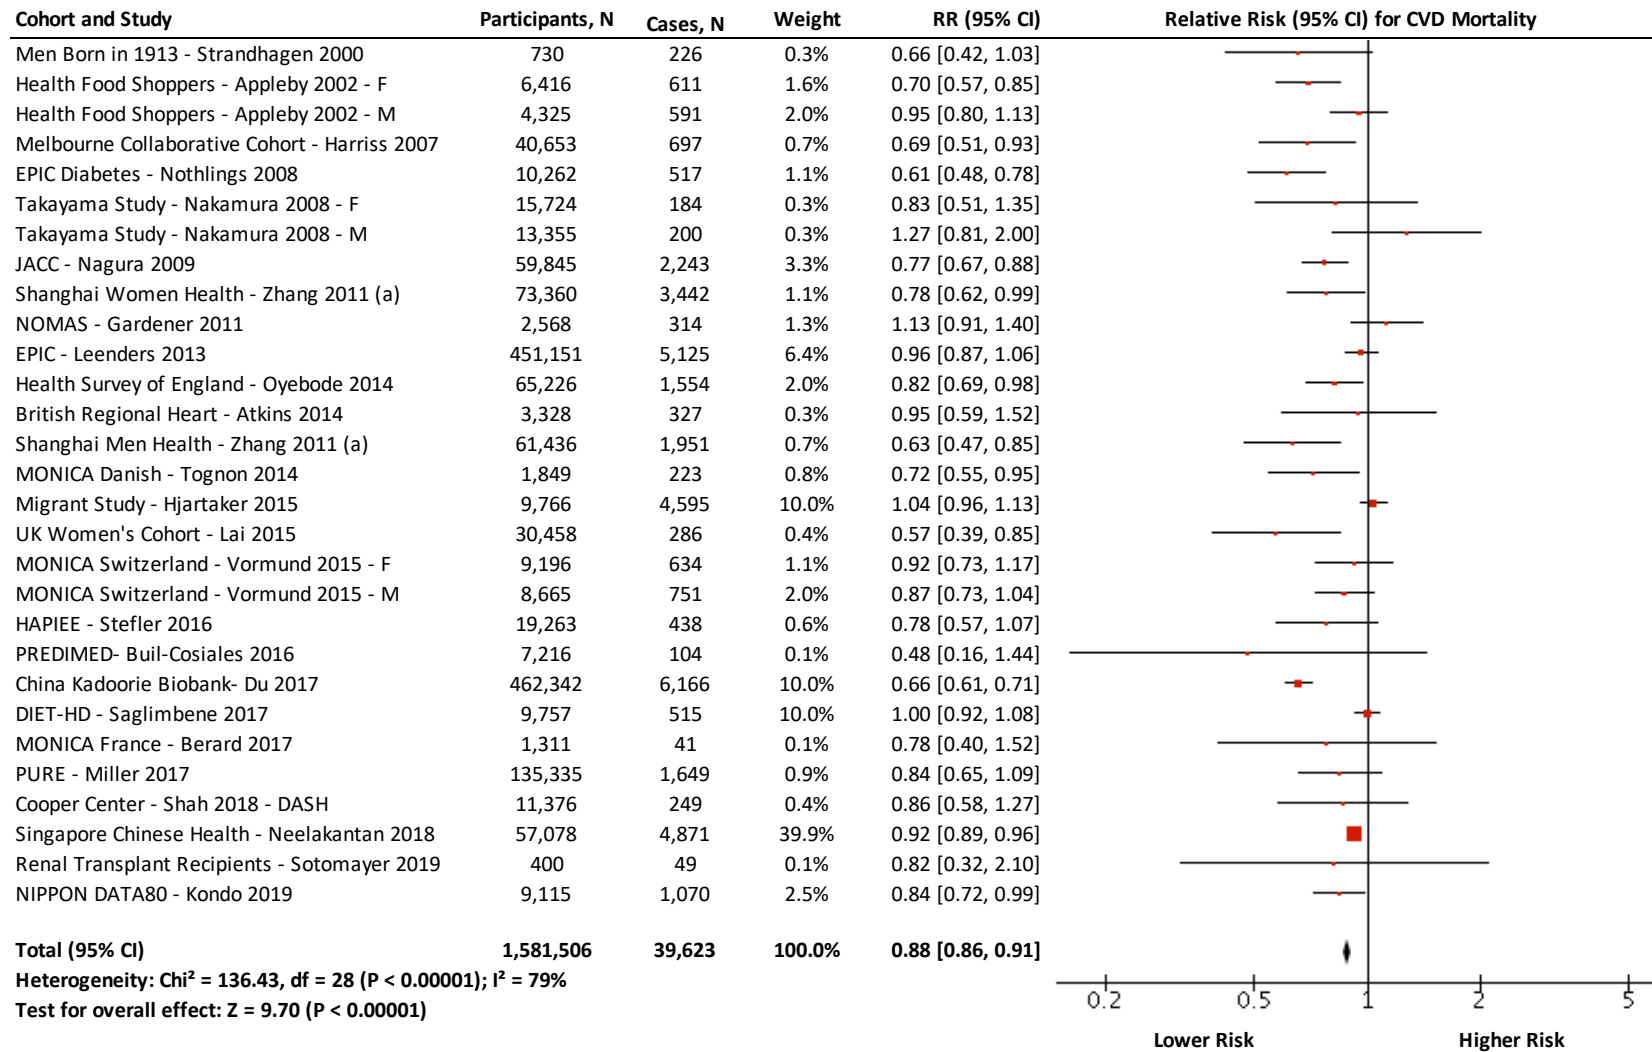

## B. Random Effect

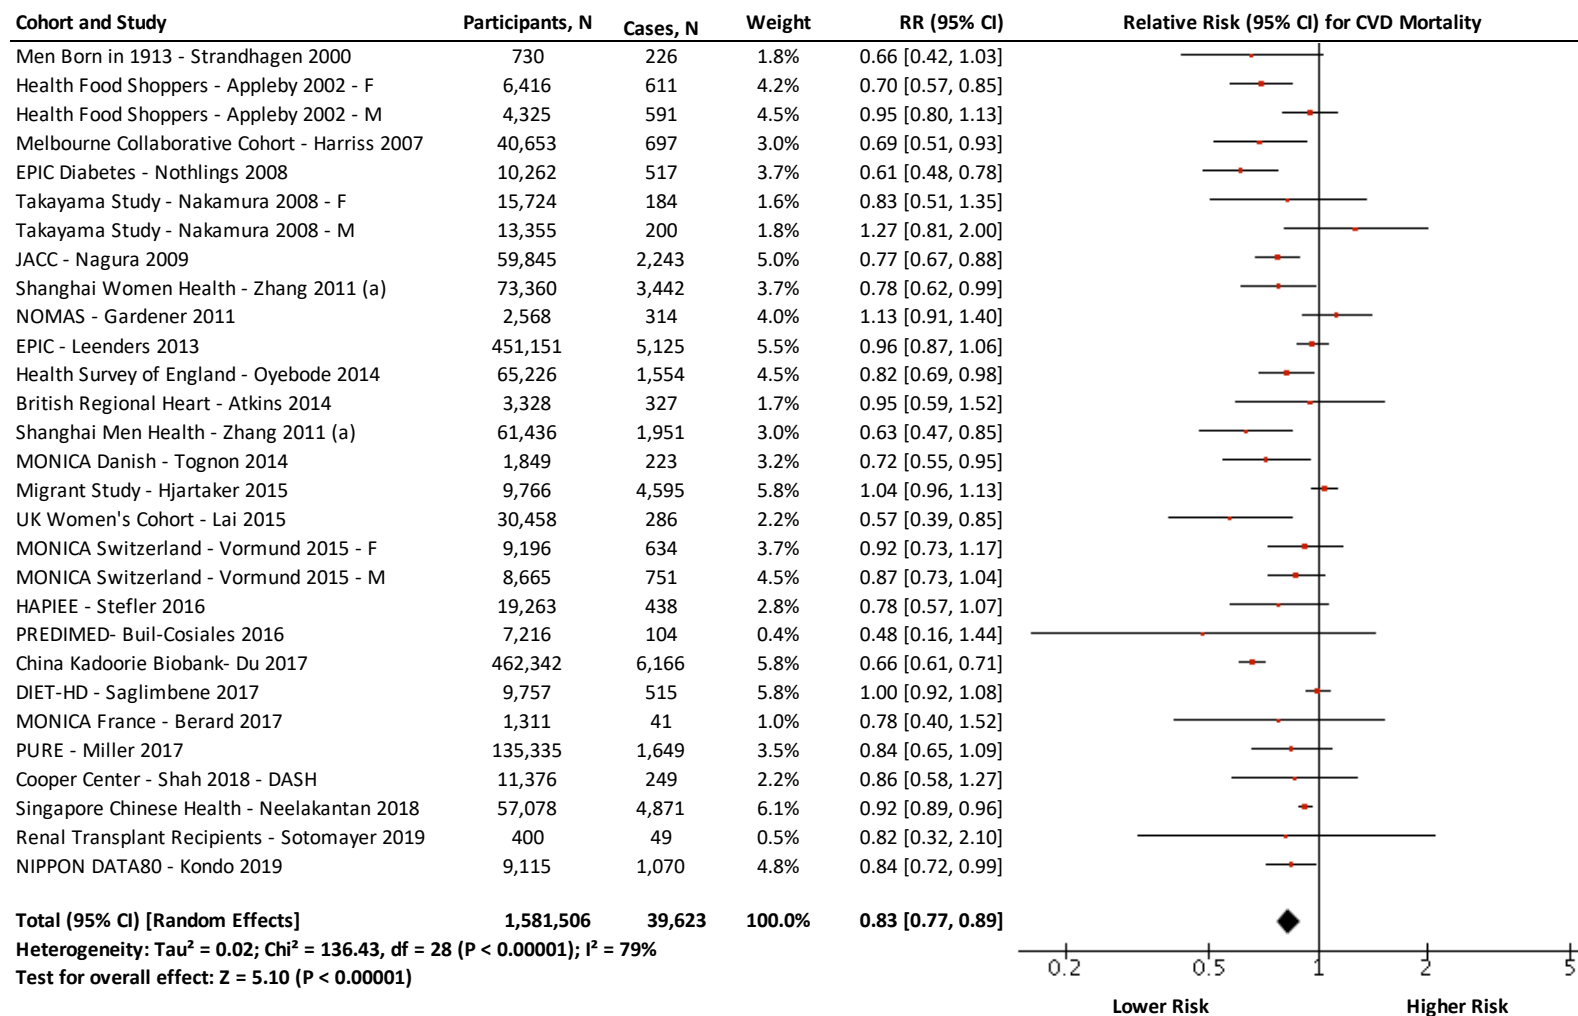

**Figure S15.** Relation between fruit intake and cardiovascular disease mortality (highest vs. lowest level of intake). All results are presented as relative risk (RR) with 95% confidence intervals (95% CI). Pooled risk estimate is represented by the black diamond using (A) fixed effects and (B) random effects models. Inter-study heterogeneity was assessed using the Cochran Q statistic ( $\chi^2$ ) at a significance level of  $p < 0.10$ , and quantified by  $I^2$ , with values  $\geq 50\%$  indicating substantial heterogeneity.



## VEGETABLES AND CARDIOVASCULAR DISEASE MORTALITY

### A. Fixed Effects

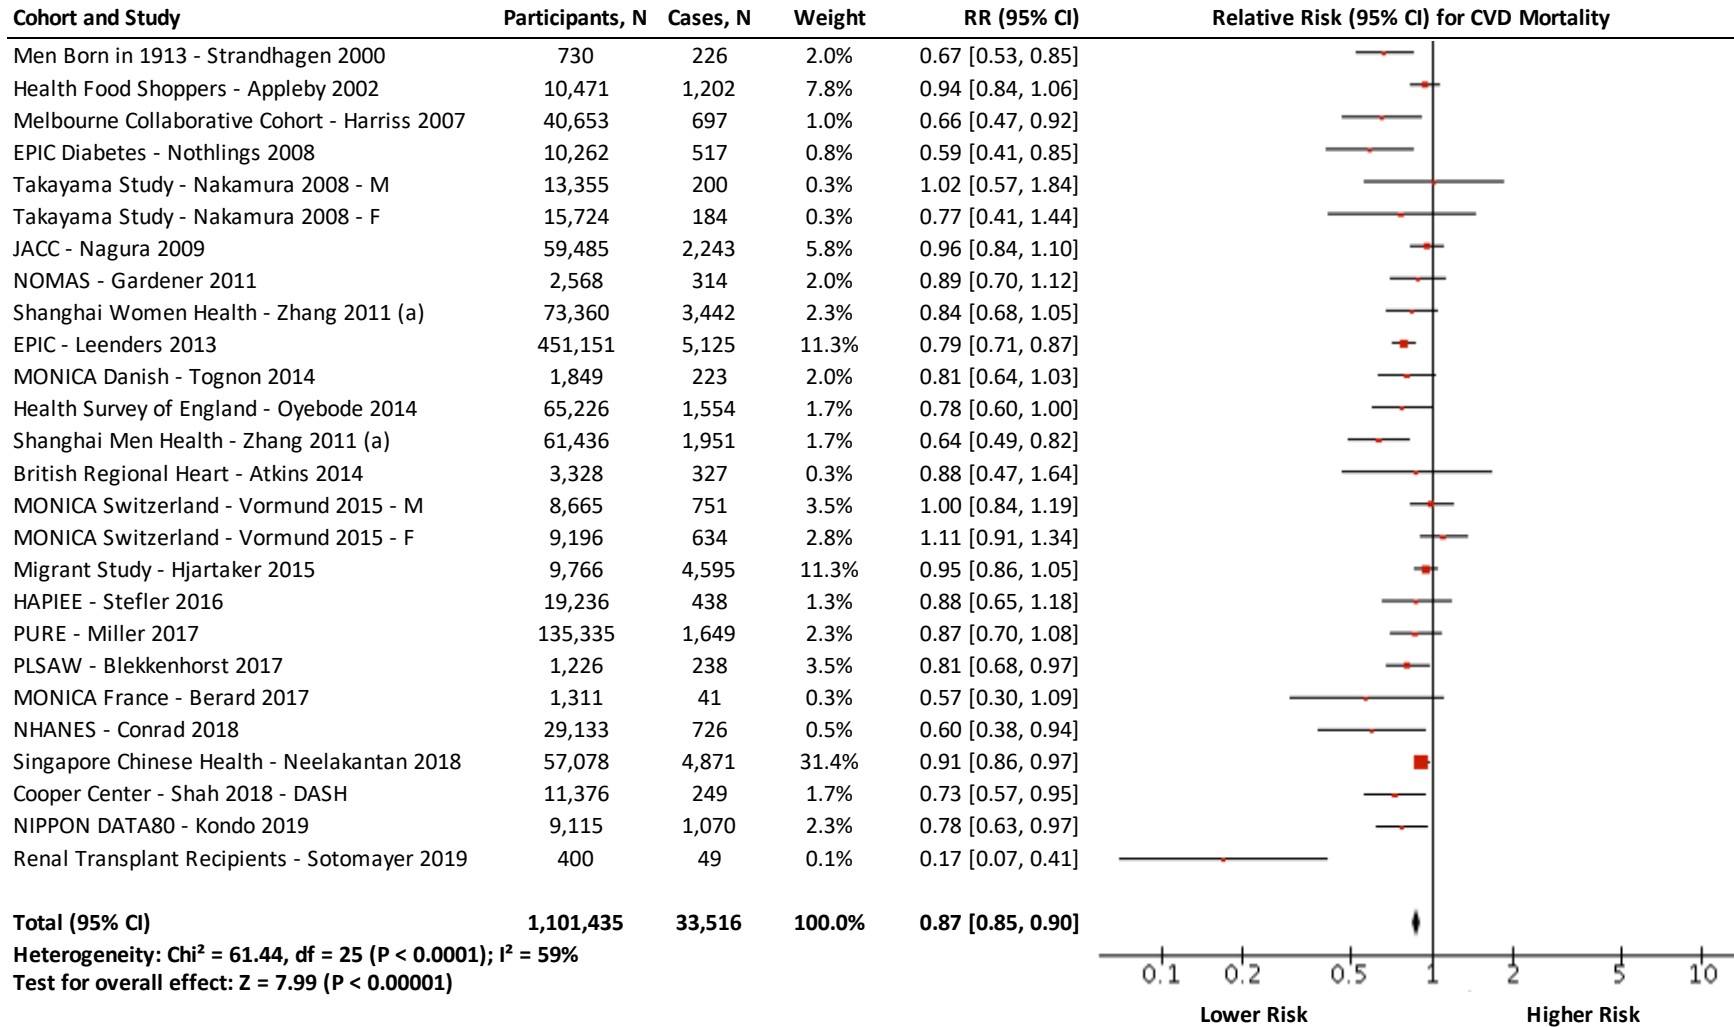

## B. Random Effects

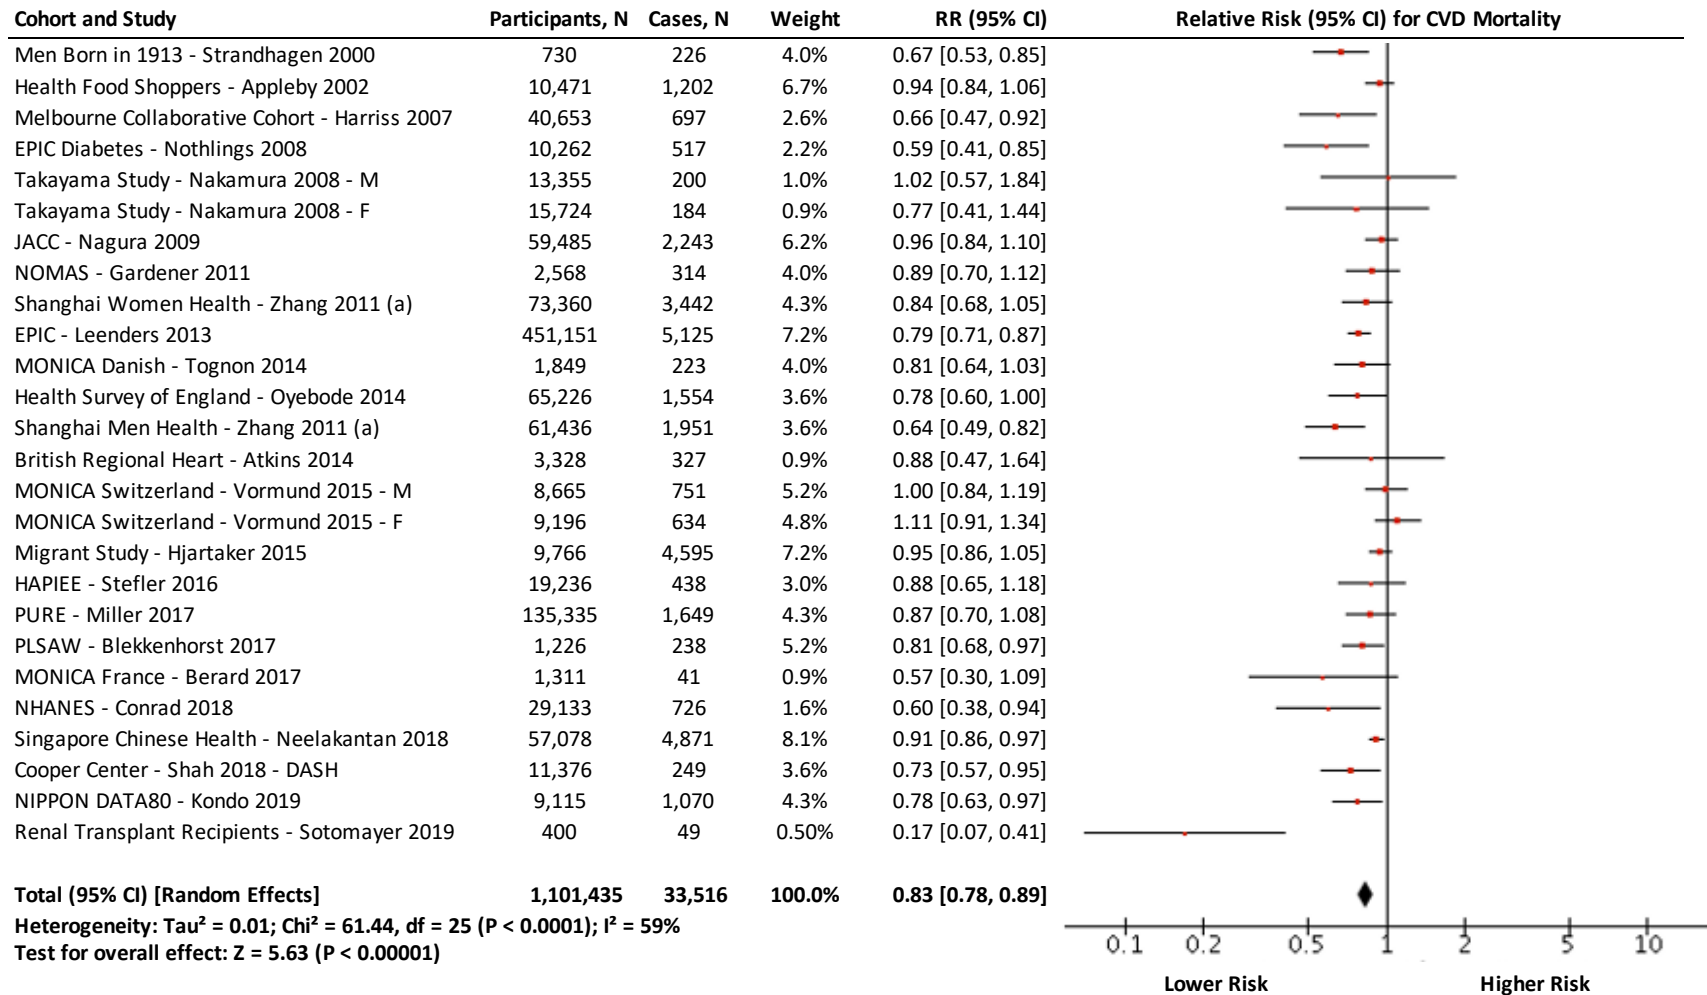

**Figure S16.** Relation between vegetable intake and cardiovascular disease mortality (highest vs. lowest level of intake). All results are presented as relative risk (RR) with 95% confidence intervals (95% CI). Pooled risk estimate is represented by the black diamond using (A) fixed effects and (B) random effects models. Inter-study heterogeneity was assessed using the Cochran Q statistic ( $\chi^2$ ) at a significance level of  $p < 0.10$ , and quantified by  $I^2$ , with values  $\geq 50\%$  indicating substantial heterogeneity.

### APRICOTS AND CARDIOVASCULAR DISEASE MORTALITY

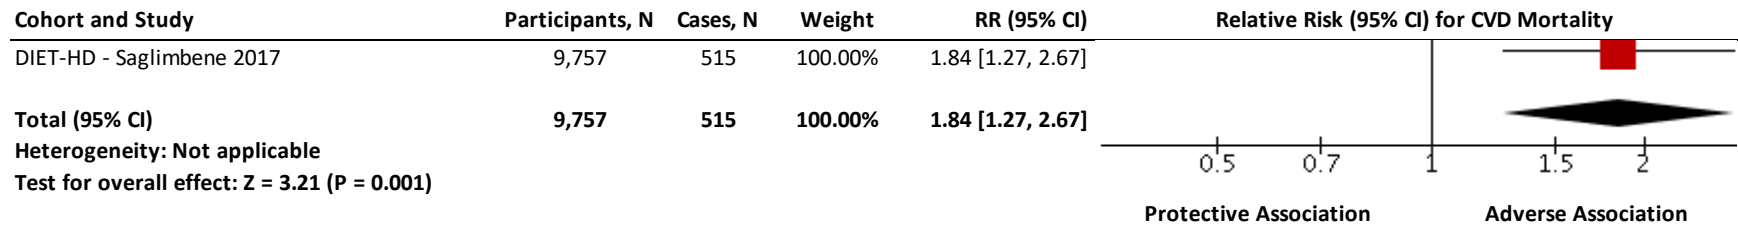

**Supplementary Figure 17.** Relation between intake of apricots and cardiovascular disease mortality (highest vs. lowest level of intake). All results are presented as relative risk (RR) with 95% confidence intervals (95% CI). Pooled risk estimate is represented by the black diamond. Inter-study heterogeneity was assessed using the Cochran Q statistic ( $\chi^2$ ) at a significance level of  $p < 0.10$ , and quantified by  $I^2$ , with values  $\geq 50\%$  indicating substantial heterogeneity.

### BANANAS AND CARDIOVASCULAR DISEASE MORTALITY

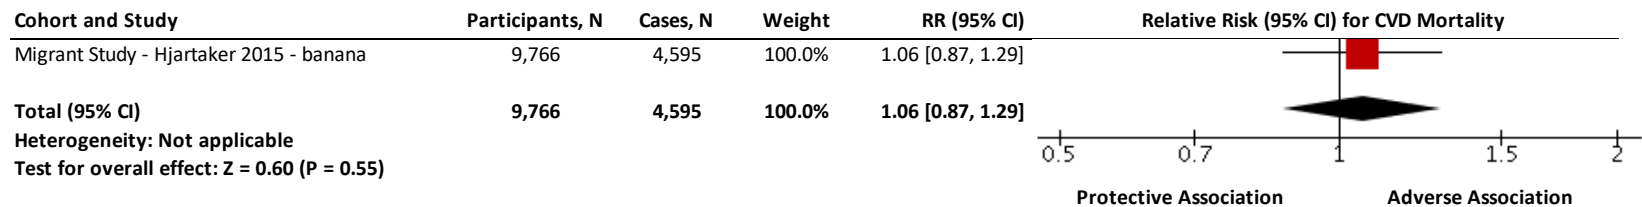

**Figure S18.** Relation between intake of bananas and cardiovascular disease mortality (highest vs. lowest level of intake). All results are presented as relative risk (RR) with 95% confidence intervals (95% CI). Pooled risk estimate is represented by the black diamond. Inter-study heterogeneity was assessed using the Cochran Q statistic ( $\chi^2$ ) at a significance level of  $p < 0.10$ , and quantified by  $I^2$ , with values  $\geq 50\%$  indicating substantial heterogeneity.

## BERRIES AND CARDIOVASCULAR DISEASE MORTALITY

### A. Fixed Effects

| Cohort and Study                    | Participants, N | Cases, N     | Weight        | RR (95% CI)              |
|-------------------------------------|-----------------|--------------|---------------|--------------------------|
| WHS - Sesso 2007                    | 38,176          | 204          | 0.8%          | 0.76 [0.38, 1.55]        |
| Iowa WHS - Mink 2007 - strawberries | 34,492          | 2,316        | 32.6%         | 0.91 [0.83, 1.01]        |
| Iowa WHS - Mink 2007 - blueberries  | -               | -            | 19.0%         | 0.93 [0.81, 1.07]        |
| Migrant Study - Hjartaker 2015      | 9,766           | 4,595        | 44.5%         | 1.03 [0.95, 1.11]        |
| UK Women's Cohort - Lai 2015        | 30,458          | 286          | 3.0%          | 0.89 [0.61, 1.29]        |
| <b>Total (95% CI)</b>               | <b>112,892</b>  | <b>7,401</b> | <b>100.0%</b> | <b>0.97 [0.92, 1.03]</b> |

Heterogeneity:  $\text{Chi}^2 = 4.68$ ,  $\text{df} = 4$  ( $P = 0.32$ );  $I^2 = 15\%$   
 Test for overall effect:  $Z = 1.04$  ( $P = 0.30$ )

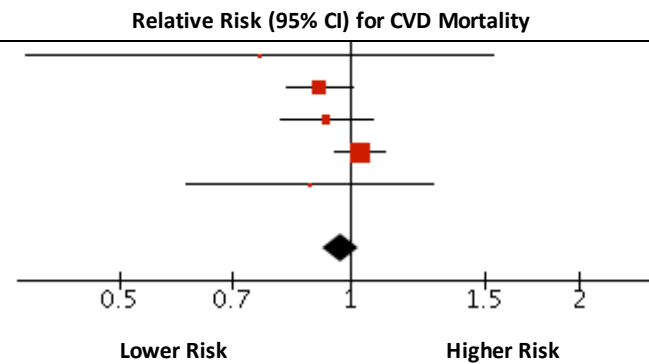

### B. Random Effects

| Cohort and Study                       | Participants, N | Cases, N     | Weight        | RR (95% CI)              |
|----------------------------------------|-----------------|--------------|---------------|--------------------------|
| Iowa WHS - Mink 2007 - strawberries    | 34,492          | 2,316        | 32.6%         | 0.91 [0.83, 1.01]        |
| WHS - Sesso 2007                       | 38,176          | 204          | 0.8%          | 0.76 [0.38, 1.55]        |
| Iowa WHS - Mink 2007 - blueberries     | -               | -            | 19.0%         | 0.93 [0.81, 1.07]        |
| Migrant Study - Hjartaker 2015         | 9,766           | 4,595        | 44.5%         | 1.03 [0.95, 1.11]        |
| UK Women's Cohort - Lai 2015           | 30,458          | 286          | 3.0%          | 0.89 [0.61, 1.29]        |
| <b>Total (95% CI) [Random Effects]</b> | <b>112,892</b>  | <b>7,401</b> | <b>100.0%</b> | <b>0.97 [0.90, 1.03]</b> |

Heterogeneity:  $\text{Tau}^2 = 0.00$ ;  $\text{Chi}^2 = 4.68$ ,  $\text{df} = 4$  ( $P = 0.32$ );  $I^2 = 15\%$   
 Test for overall effect:  $Z = 1.06$  ( $P = 0.29$ )

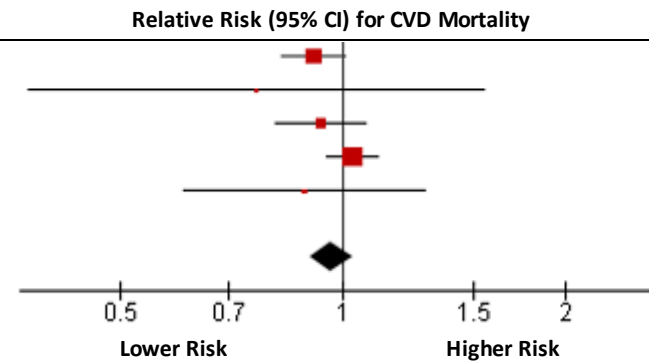

**Figure S19.** Relation between intake of berries and cardiovascular disease mortality (highest vs. lowest level of intake). All results are presented as relative risk (RR) with 95% confidence intervals (95% CI). Pooled risk estimate is represented by the black diamond using (A) fixed effects and (B) random effects models. Inter-study heterogeneity was assessed using the Cochran Q statistic ( $\text{Chi}^2$ ) at a significance level of  $p < 0.10$ , and quantified by  $I^2$ , with values  $\geq 50\%$  indicating substantial heterogeneity.

## CITRUS FRUIT AND CARDIOVASCULAR DISEASE MORTALITY

### A. Fixed Effects

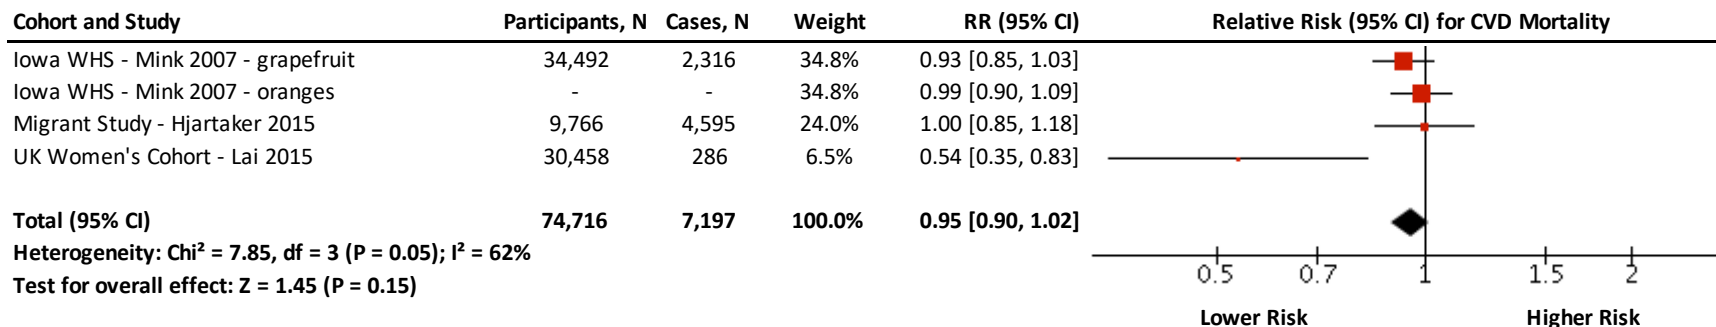

### B. Random Effects

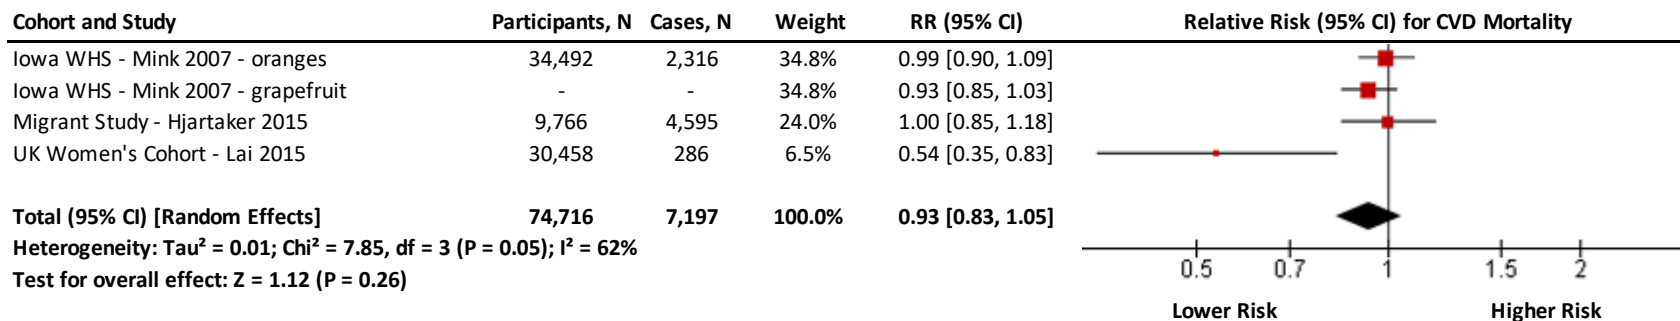

**Figure S20.** Relation between citrus fruit intake and cardiovascular disease mortality (highest vs. lowest level of intake). All results are presented as relative risk (RR) with 95% confidence intervals (95% CI). Pooled risk estimate is represented by the black diamond using (A) fixed effects and (B) random effects models. Inter-study heterogeneity was assessed using the Cochran Q statistic ( $\text{Chi}^2$ ) at a significance level of  $p < 0.10$ , and quantified by  $I^2$ , with values  $\geq 50\%$  indicating substantial heterogeneity.

## DRIED FRUIT AND CARDIOVASCULAR DISEASE MORTALITY

### A. Fixed Effects

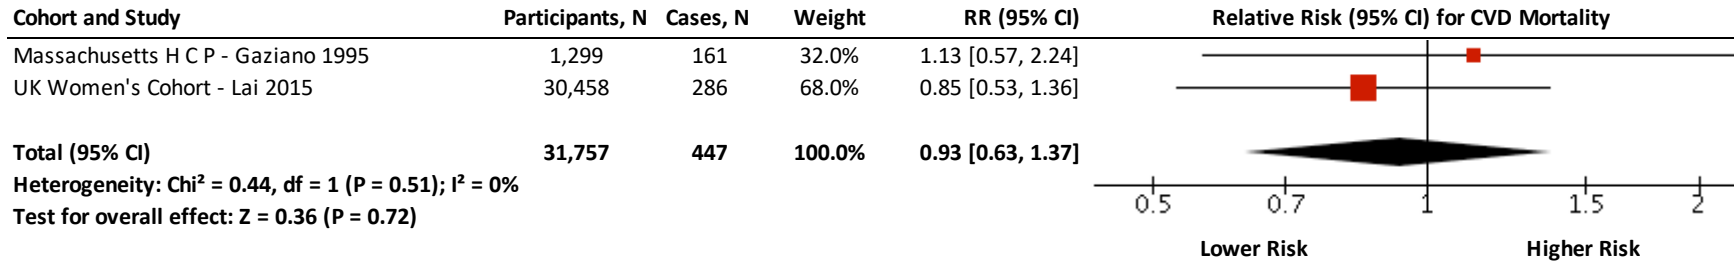

### B. Random Effects

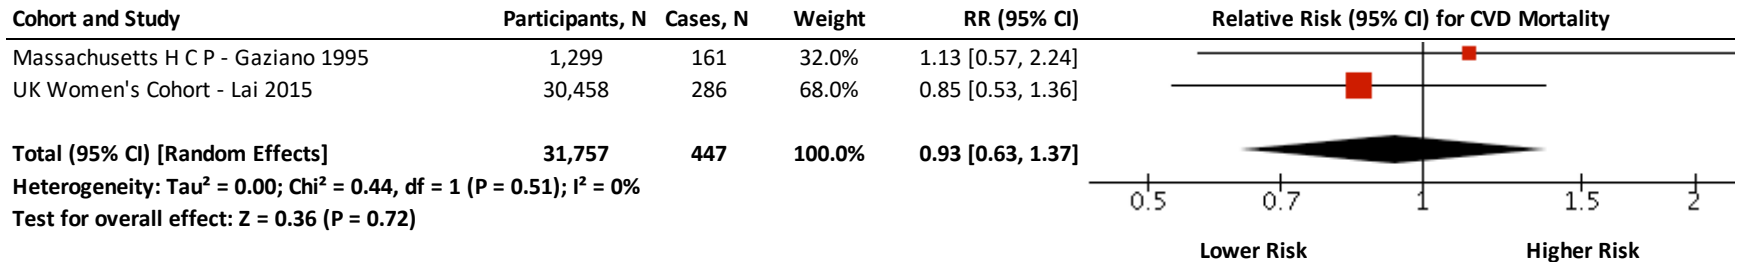

**Figure S21.** Relation between dried fruit intake and cardiovascular disease mortality (highest vs. lowest level of intake). All results are presented as relative risk (RR) with 95% confidence intervals (95% CI). Pooled risk estimate is represented by the black diamond using (A) fixed effects and (B) random effects models. Inter-study heterogeneity was assessed using the Cochran Q statistic ( $\text{Chi}^2$ ) at a significance level of  $p < 0.10$ , and quantified by  $I^2$ , with values  $\geq 50\%$  indicating substantial heterogeneity

## FRUIT JUICE AND CARDIOVASCULAR DISEASE MORTALITY

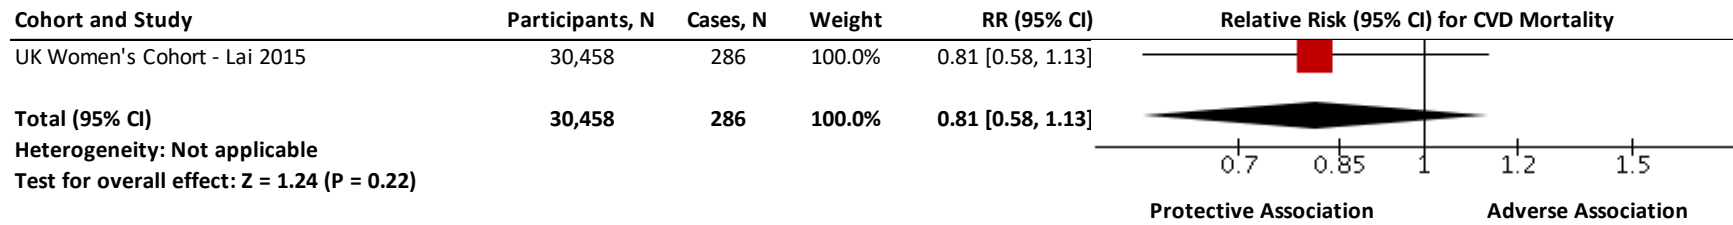

**Figure S22.** Relation between fruit juice intake and cardiovascular disease mortality (highest vs. lowest level of intake). All results are presented as relative risk (RR) with 95% confidence intervals (95% CI). Pooled risk estimate is represented by the black diamond. Inter-study heterogeneity was assessed using the Cochran Q statistic ( $\text{Chi}^2$ ) at a significance level of  $p < 0.10$ , and quantified by  $I^2$ , with values  $\geq 50\%$  indicating substantial heterogeneity.

## GRAPES AND CARDIOVASCULAR DISEASE MORTALITY

### A. Fixed Effects

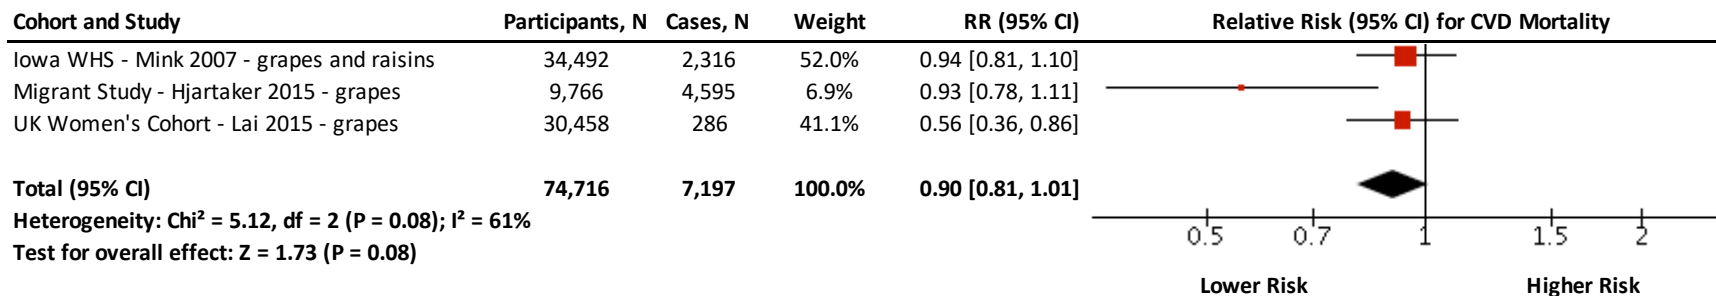

### B. Random Effects

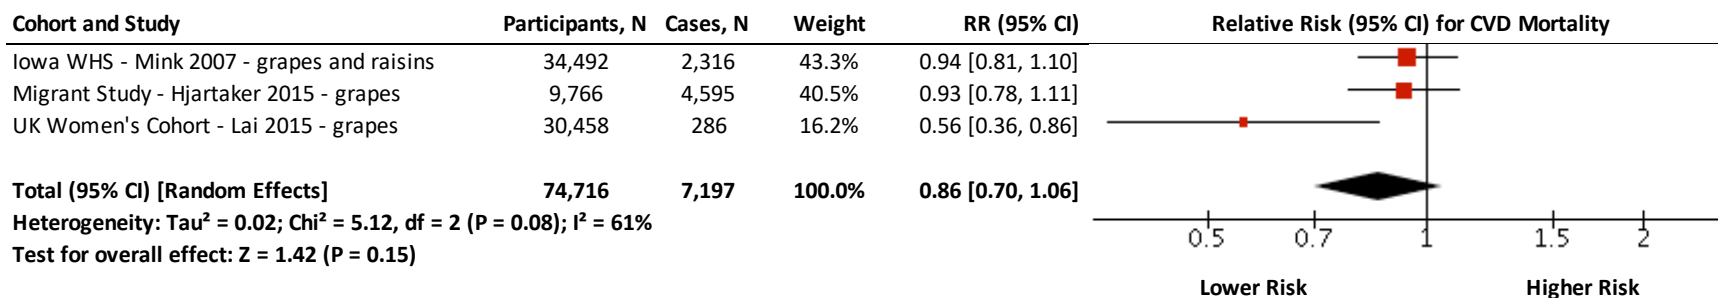

**Figure S23.** Relation between intake of grapes and cardiovascular disease mortality (highest vs. lowest level of intake). All results are presented as relative risk (RR) with 95% confidence intervals (95% CI). Pooled risk estimate is represented by the black diamond using (A) fixed effects and (B) random effects models. Inter-study heterogeneity was assessed using the Cochran Q statistic ( $\text{Chi}^2$ ) at a significance level of  $p < 0.10$ , and quantified by  $I^2$ , with values  $\geq 50\%$  indicating substantial heterogeneity.



## POMMES AND CARDIOVASCULAR DISEASE MORTALITY

### A. Fixed Effects

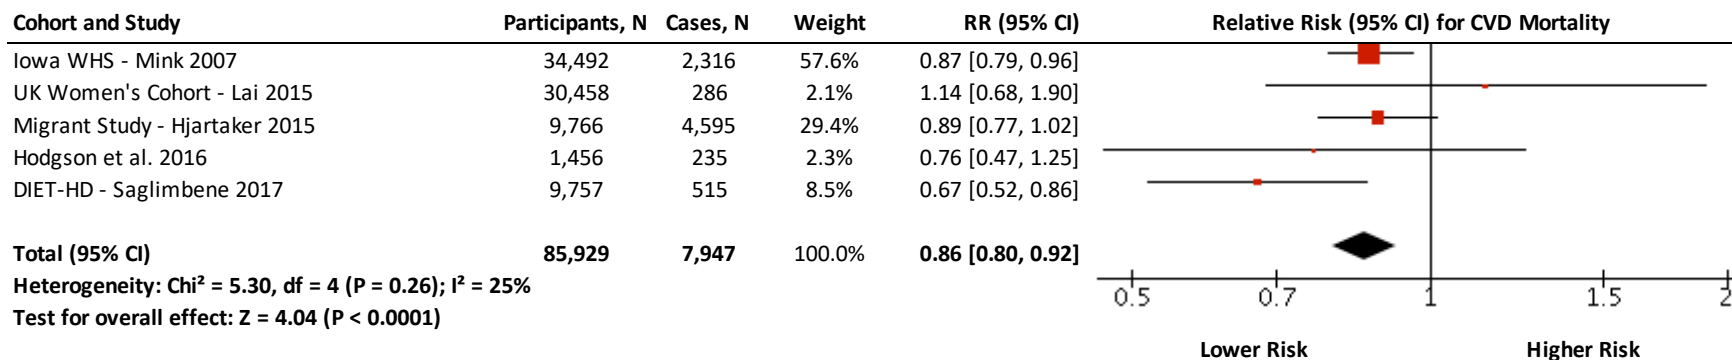

### B. Random Effects

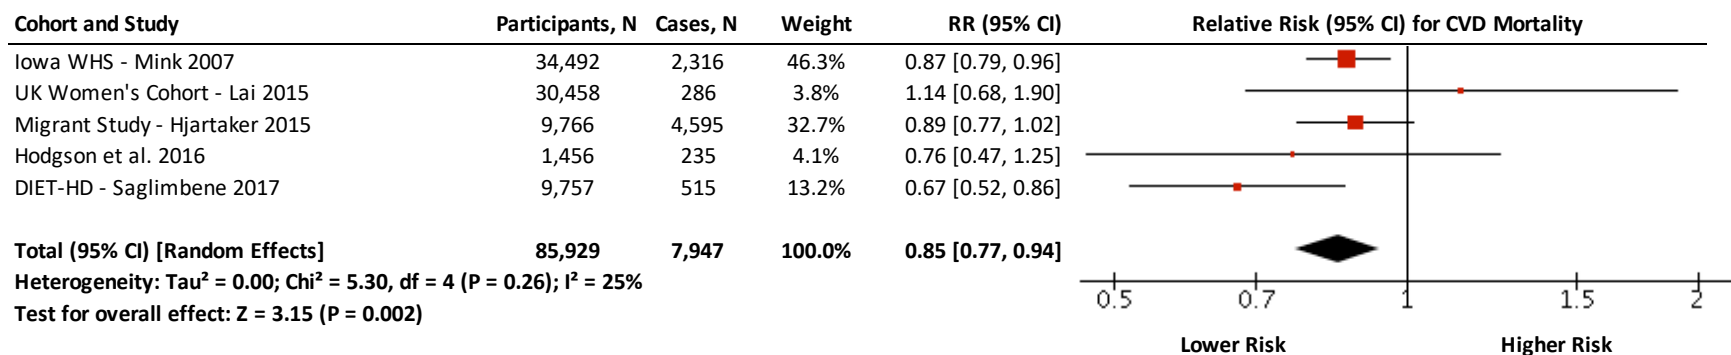

**Figure S24.** Relation between pomes fruit intake and cardiovascular disease mortality (highest vs. lowest level of intake). All results are presented as relative risk (RR) with 95% confidence intervals (95% CI). Pooled risk estimate is represented by the black diamond using (A) fixed effects and (B) random effects models. Inter-study heterogeneity was assessed using the Cochran Q statistic ( $\text{Chi}^2$ ) at a significance level of  $p < 0.10$ , and quantified by  $I^2$ , with values  $\geq 50\%$  indicating substantial heterogeneity.

## ALLIUM VEGETABLES AND CARDIOVASCULAR DISEASE MORTALITY

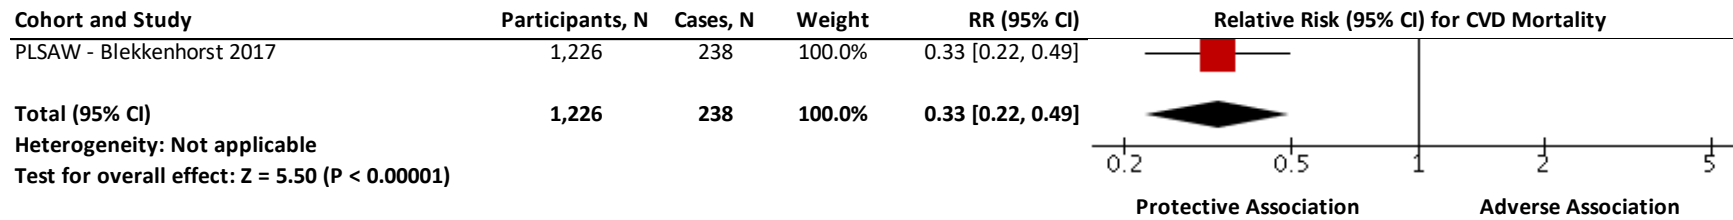

**Figure S25.** Relation between intake allium vegetables and cardiovascular disease mortality (highest vs. lowest level of intake). All results are presented as relative risk (RR) with 95% confidence intervals (95% CI). Pooled risk estimate is represented by the black diamond. Inter-study heterogeneity was assessed using the Cochran Q statistic (Chi<sup>2</sup>) at a significance level of p<0.10, and quantified by I<sup>2</sup>, with values ≥ 50% indicating substantial heterogeneity.

## CARROTS AND CARDIOVASCULAR DISEASE MORTALITY

### A. Fixed Effects

| Cohort and Study                          | Participants, N | Cases, N     | Weight        | RR (95% CI)              |
|-------------------------------------------|-----------------|--------------|---------------|--------------------------|
| Zutphen Elderly - Buijsse 2008- Carrots   | 559             | 197          | 20.0%         | 0.83 [0.68, 1.01]        |
| Miigrant Study - Hjartaker 2015 - carrots | 9,766           | 4,595        | 80.0%         | 0.95 [0.86, 1.05]        |
| <b>Total (95% CI)</b>                     | <b>10,325</b>   | <b>4,792</b> | <b>100.0%</b> | <b>0.92 [0.85, 1.01]</b> |

Heterogeneity:  $\text{Chi}^2 = 1.57$ ,  $\text{df} = 1$  ( $P = 0.21$ );  $I^2 = 36\%$   
 Test for overall effect:  $Z = 1.74$  ( $P = 0.08$ )

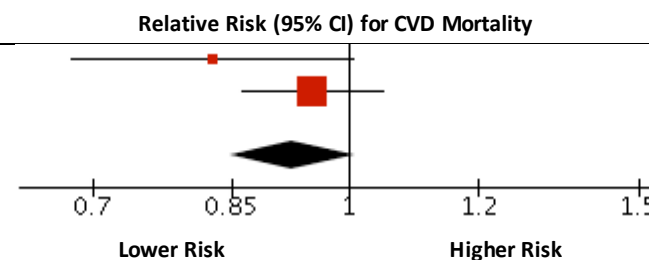

### B. Random Effects

| Cohort and Study                          | Participants, N | Cases, N     | Weight        | RR (95% CI)              |
|-------------------------------------------|-----------------|--------------|---------------|--------------------------|
| Zutphen Elderly - Buijsse 2008- Carrots   | 559             | 197          | 30.9%         | 0.83 [0.68, 1.01]        |
| Miigrant Study - Hjartaker 2015 - carrots | 9,766           | 4,595        | 69.1%         | 0.95 [0.86, 1.05]        |
| <b>Total (95% CI) [Random Effects]</b>    | <b>10,325</b>   | <b>4,792</b> | <b>100.0%</b> | <b>0.91 [0.80, 1.03]</b> |

Heterogeneity:  $\text{Tau}^2 = 0.00$ ;  $\text{Chi}^2 = 1.57$ ,  $\text{df} = 1$  ( $P = 0.21$ );  $I^2 = 36\%$   
 Test for overall effect:  $Z = 1.44$  ( $P = 0.15$ )

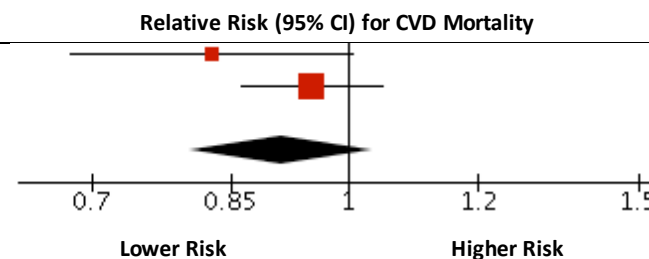

**Figure S26.** Relation between carrots intake and cardiovascular disease mortality (highest vs. lowest level of intake). All results are presented as relative risk (RR) with 95% confidence intervals (95% CI). Pooled risk estimate is represented by the black diamond using (A) fixed effects and (B) random effects models. Inter-study heterogeneity was assessed using the Cochran Q statistic ( $\text{Chi}^2$ ) at a significance level of  $p < 0.10$ , and quantified by  $I^2$ , with values  $\geq 50\%$  indicating substantial heterogeneity.

## CELERY AND CARDIOVASCULAR DISEASE MORTALITY

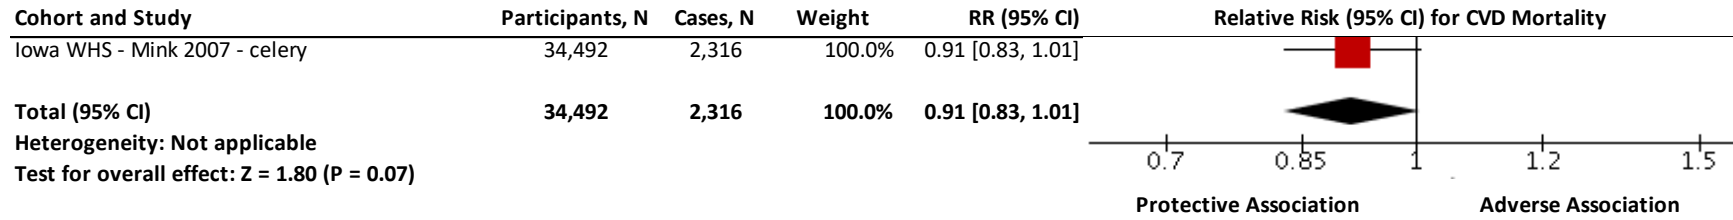

**Figure S27.** Relation between celery intake and cardiovascular disease mortality (highest vs. lowest level of intake). All results are presented as relative risk (RR) with 95% confidence intervals (95% CI). Pooled risk estimate is represented by the black diamond using (A) fixed effects and (B) random effects models. Inter-study heterogeneity was assessed using the Cochran Q statistic ( $\text{Chi}^2$ ) at a significance level of  $p < 0.10$ , and quantified by  $I^2$ , with values  $\geq 50\%$  indicating substantial heterogeneity.

## CRUCIFEROUS VEGETABLES AND CARDIOVASCULAR DISEASE MORTALITY

### A. Fixed Effects

| Cohort and Study                               | Participants, N | Cases, N      | Weight        | RR (95% CI)              |
|------------------------------------------------|-----------------|---------------|---------------|--------------------------|
| Massachusetts Health Care Panel - Gaziano 1995 | 1,299           | 161           | 0.1%          | 0.29 [0.04, 2.10]        |
| Odyssey - Genkinger 2004                       | 6,151           | 378           | 1.8%          | 0.89 [0.64, 1.24]        |
| Iowa WHS - Mink 2007                           | 34,492          | 2,316         | 21.3%         | 0.94 [0.85, 1.04]        |
| Shanghai Women Health - Zhang 2011 (a)         | 73,360          | 3,442         | 3.2%          | 0.61 [0.47, 0.79]        |
| Shanghai Men Health - Zhang 2011 (a)           | 61,436          | 1,951         | 5.3%          | 0.76 [0.63, 0.93]        |
| Migrant Study - Hjartaker 2015 - cauliflower   | 9,766           | 4,595         | 59.2%         | 0.85 [0.80, 0.90]        |
| Migrant Study - Hjartaker 2015 - cabbage       | -               | -             | 5.3%          | 1.22 [1.00, 1.49]        |
| PLSAW - Blekkenhorst 2017                      | 1,226           | 238           | 3.7%          | 0.48 [0.38, 0.61]        |
| <b>Total (95% CI)</b>                          | <b>187,730</b>  | <b>13,081</b> | <b>100.0%</b> | <b>0.85 [0.82, 0.89]</b> |

Heterogeneity:  $\text{Chi}^2 = 48.35$ ,  $\text{df} = 7$  ( $P < 0.00001$ );  $I^2 = 86\%$   
 Test for overall effect:  $Z = 6.79$  ( $P < 0.00001$ )

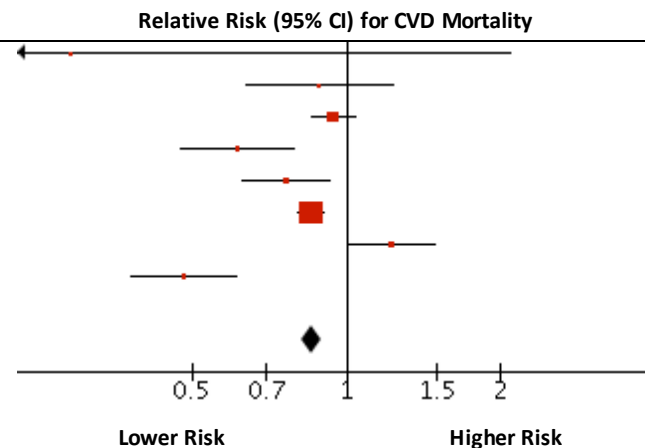

### B. Random Effects

| Cohort and Study                               | Participants, N | Cases, N      | Weight        | RR (95% CI)              |
|------------------------------------------------|-----------------|---------------|---------------|--------------------------|
| Massachusetts Health Care Panel - Gaziano 1995 | 1299            | 161           | 0.6%          | 0.29 [0.04, 2.10]        |
| Odyssey - Genkinger 2004                       | 6,151           | 378           | 10.2%         | 0.89 [0.64, 1.24]        |
| Iowa WHS - Mink 2007                           | 34,492          | 2,316         | 17.1%         | 0.94 [0.85, 1.04]        |
| Shanghai Women Health - Zhang 2011 (a)         | 73,360          | 3,442         | 12.5%         | 0.61 [0.47, 0.79]        |
| Shanghai Men Health - Zhang 2011 (a)           | 61,436          | 1,951         | 14.3%         | 0.76 [0.63, 0.93]        |
| Migrant Study - Hjartaker 2015 - cauliflower   | 9,766           | 4,595         | 17.8%         | 0.85 [0.80, 0.90]        |
| Migrant Study - Hjartaker 2015 - cabbage       | -               | -             | 14.3%         | 1.22 [1.00, 1.49]        |
| PLSAW - Blekkenhorst 2017                      | 1,226           | 238           | 13.1%         | 0.48 [0.38, 0.61]        |
| <b>Total (95% CI) [Random Effects]</b>         | <b>187,730</b>  | <b>13,081</b> | <b>100.0%</b> | <b>0.80 [0.68, 0.94]</b> |

Heterogeneity:  $\text{Tau}^2 = 0.04$ ;  $\text{Chi}^2 = 48.35$ ,  $\text{df} = 7$  ( $P < 0.00001$ );  $I^2 = 86\%$   
 Test for overall effect:  $Z = 2.75$  ( $P = 0.006$ )

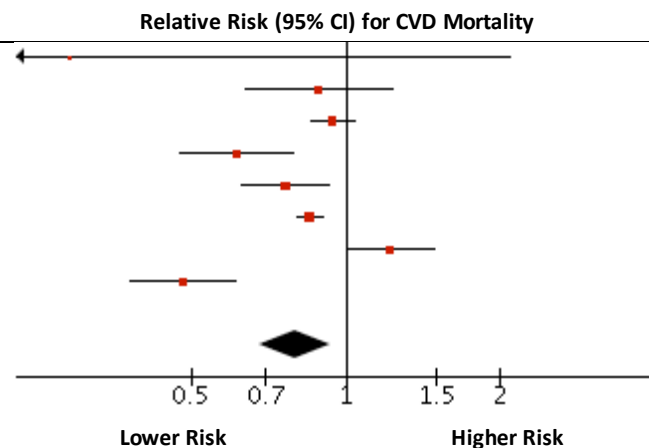

**Figure S28.** Relation between intake of cruciferous vegetables and cardiovascular disease mortality (highest vs. lowest level of intake). All results are presented as relative risk (RR) with 95% confidence intervals (95% CI). Pooled risk estimate is represented by the black diamond using (A) fixed effects and (B) random effects models. Inter-study heterogeneity was assessed using the Cochran Q statistic ( $\text{Chi}^2$ ) at a significance level of  $p < 0.10$ , and quantified by  $I^2$ , with values  $\geq 50\%$  indicating substantial heterogeneity.

## GREEN LEAFY VEGETABLES AND CARDIOVASCULAR DISEASE MORTALITY

### A. Fixed Effects

| Cohort and Study                                                                            | Participants, N | Cases, N     | Weight        | RR (95% CI)              |
|---------------------------------------------------------------------------------------------|-----------------|--------------|---------------|--------------------------|
| Massachusetts Health Care Panel - Gaziano 1995                                              | 1,299           | 161          | 2.3%          | 0.49 [0.31, 0.77]        |
| Health Food Shoppers - Appleby 2002                                                         | 10,741          | 282          | 34.4%         | 0.94 [0.84, 1.06]        |
| MONICA Switzerland - Vormund 2015 - M                                                       | 8,665           | 751          | 15.3%         | 1.04 [0.87, 1.24]        |
| Migrant Study - Hjartaker 2015                                                              | 9,766           | 4,595        | 16.3%         | 1.04 [0.88, 1.23]        |
| MONICA Switzerland - Vormund 2015 - F                                                       | 9,196           | 634          | 12.4%         | 0.93 [0.77, 1.13]        |
| PLSAW - Blekkenhorst 2017                                                                   | 1,226           | 238          | 19.3%         | 0.59 [0.50, 0.69]        |
| <b>Total (95% CI)</b>                                                                       | <b>40,893</b>   | <b>6,661</b> | <b>100.0%</b> | <b>0.87 [0.81, 0.94]</b> |
| <b>Heterogeneity: Chi<sup>2</sup> = 40.44, df = 5 (P &lt; 0.00001); I<sup>2</sup> = 88%</b> |                 |              |               |                          |
| <b>Test for overall effect: Z = 3.86 (P = 0.0001)</b>                                       |                 |              |               |                          |

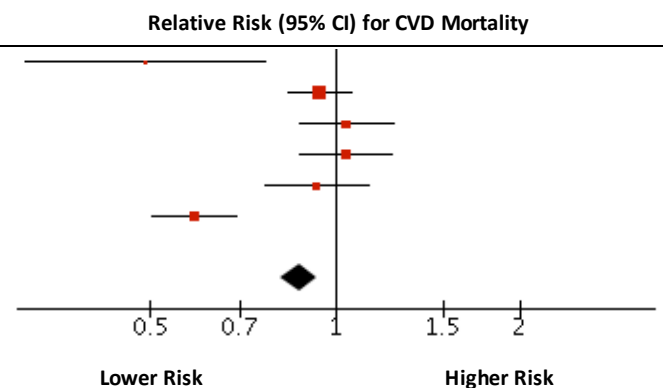

### B. Random Effects

| Cohort and Study                                                                                                    | Participants, N | Cases, N     | Weight        | RR (95% CI)              |
|---------------------------------------------------------------------------------------------------------------------|-----------------|--------------|---------------|--------------------------|
| Massachusetts Health Care Panel - Gaziano 1995                                                                      | 1,299           | 161          | 10.4%         | 0.49 [0.31, 0.77]        |
| Health Food Shoppers - Appleby 2002                                                                                 | 10,741          | 282          | 19.0%         | 0.94 [0.84, 1.06]        |
| Migrant Study - Hjartaker 2015                                                                                      | 9,766           | 4,595        | 17.8%         | 1.04 [0.88, 1.23]        |
| MONICA Switzerland - Vormund 2015 - M                                                                               | 8,665           | 751          | 17.6%         | 1.04 [0.87, 1.24]        |
| MONICA Switzerland - Vormund 2015 - F                                                                               | 9,196           | 634          | 17.1%         | 0.93 [0.77, 1.13]        |
| PLSAW - Blekkenhorst 2017                                                                                           | 1,226           | 238          | 18.1%         | 0.59 [0.50, 0.69]        |
| <b>Total (95% CI) [Random Effects]</b>                                                                              | <b>40,893</b>   | <b>6,661</b> | <b>100.0%</b> | <b>0.84 [0.68, 1.03]</b> |
| <b>Heterogeneity: Tau<sup>2</sup> = 0.06; Chi<sup>2</sup> = 40.44, df = 5 (P &lt; 0.00001); I<sup>2</sup> = 88%</b> |                 |              |               |                          |
| <b>Test for overall effect: Z = 1.68 (P = 0.09)</b>                                                                 |                 |              |               |                          |

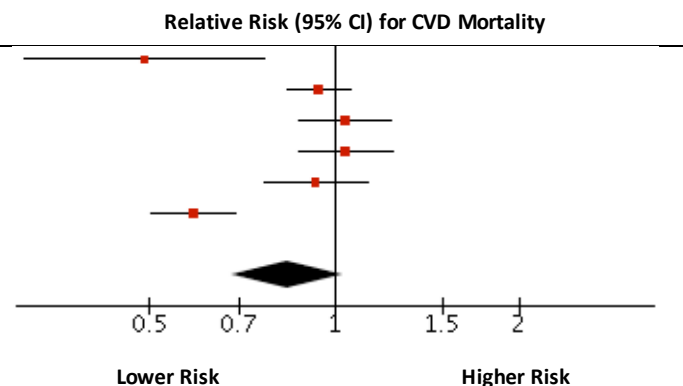

**Figure S29.** Relation between intake of green leafy vegetables and cardiovascular disease mortality (highest vs. lowest level of intake). All results are presented as relative risk (RR) with 95% confidence intervals (95% CI). Pooled risk estimate is represented by the black diamond using (A) fixed effects and (B) random effects models. Inter-study heterogeneity was assessed using the Cochran Q statistic (Chi<sup>2</sup>) at a significance level of p<0.10, and quantified by I<sup>2</sup>, with values ≥ 50% indicating substantial heterogeneity.

## TOMATOES AND CARDIOVASCULAR DISEASE MORTALITY

### A. Fixed Effects

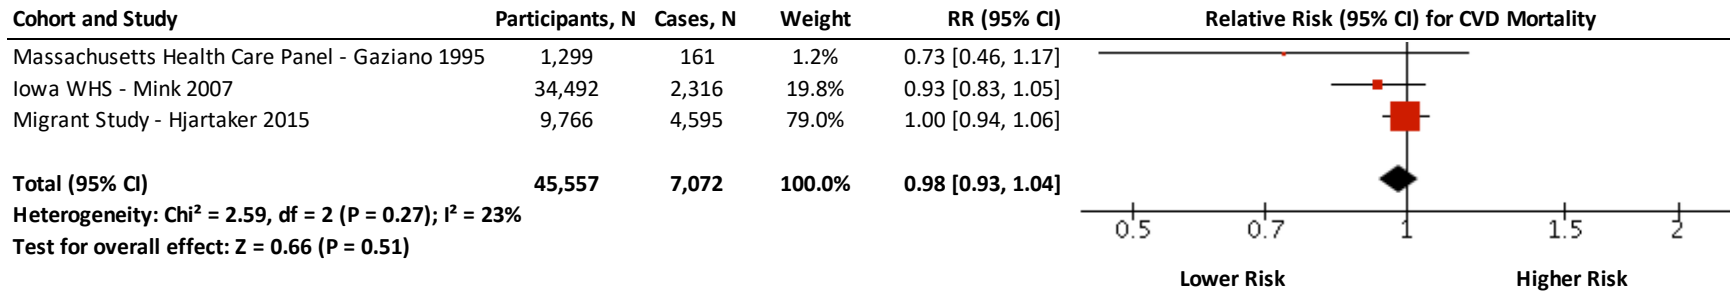

### B. Random Effects

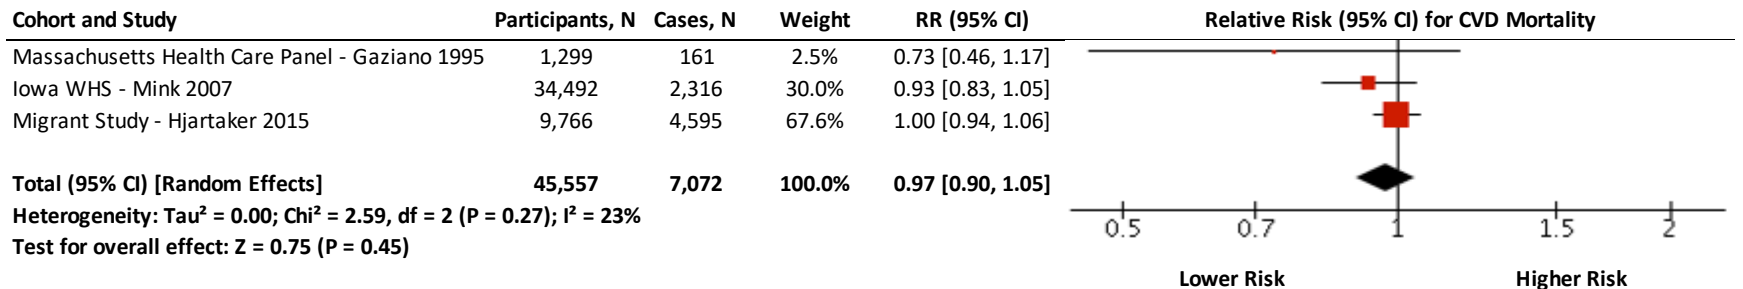

**Figure S30.** Relation between tomato intake and cardiovascular disease mortality (highest vs. lowest level of intake). All results are presented as relative risk (RR) with 95% confidence intervals (95% CI). Pooled risk estimate is represented by the black diamond using (A) fixed effects and (B) random effects models. Inter-study heterogeneity was assessed using the Cochran Q statistic ( $\text{Chi}^2$ ) at a significance level of  $p < 0.10$ , and quantified by  $I^2$ , with values  $\geq 50\%$  indicating substantial heterogeneity.

## A. Fixed Effects

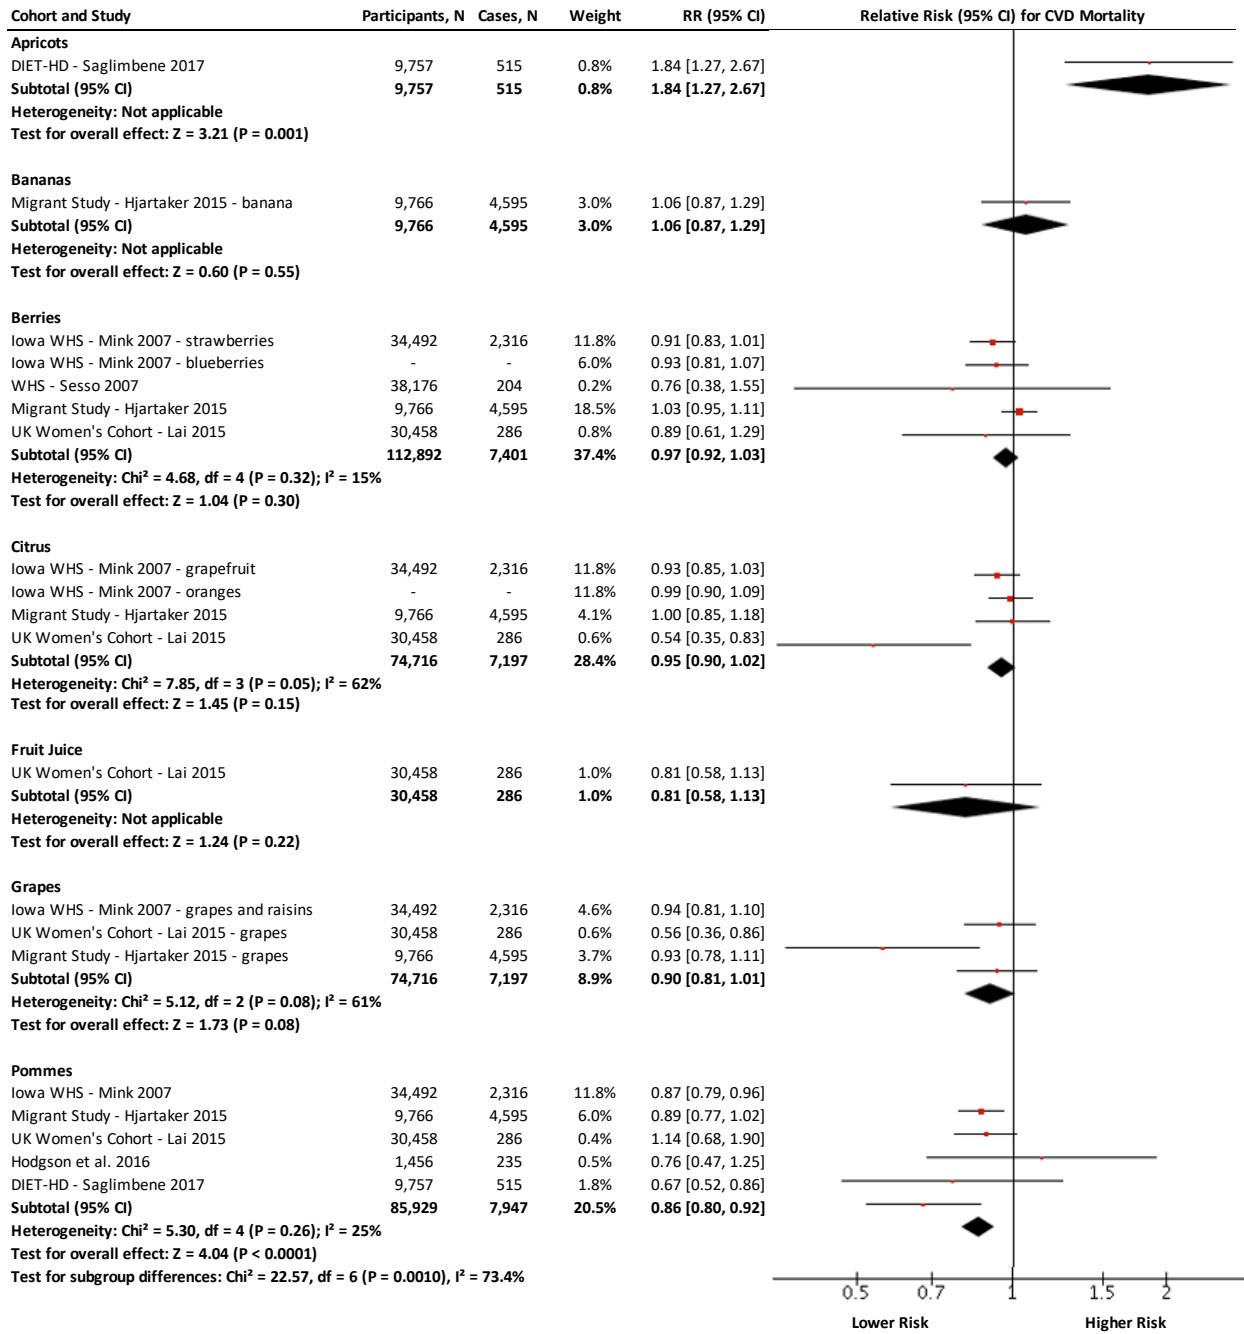



## B. Random Effects

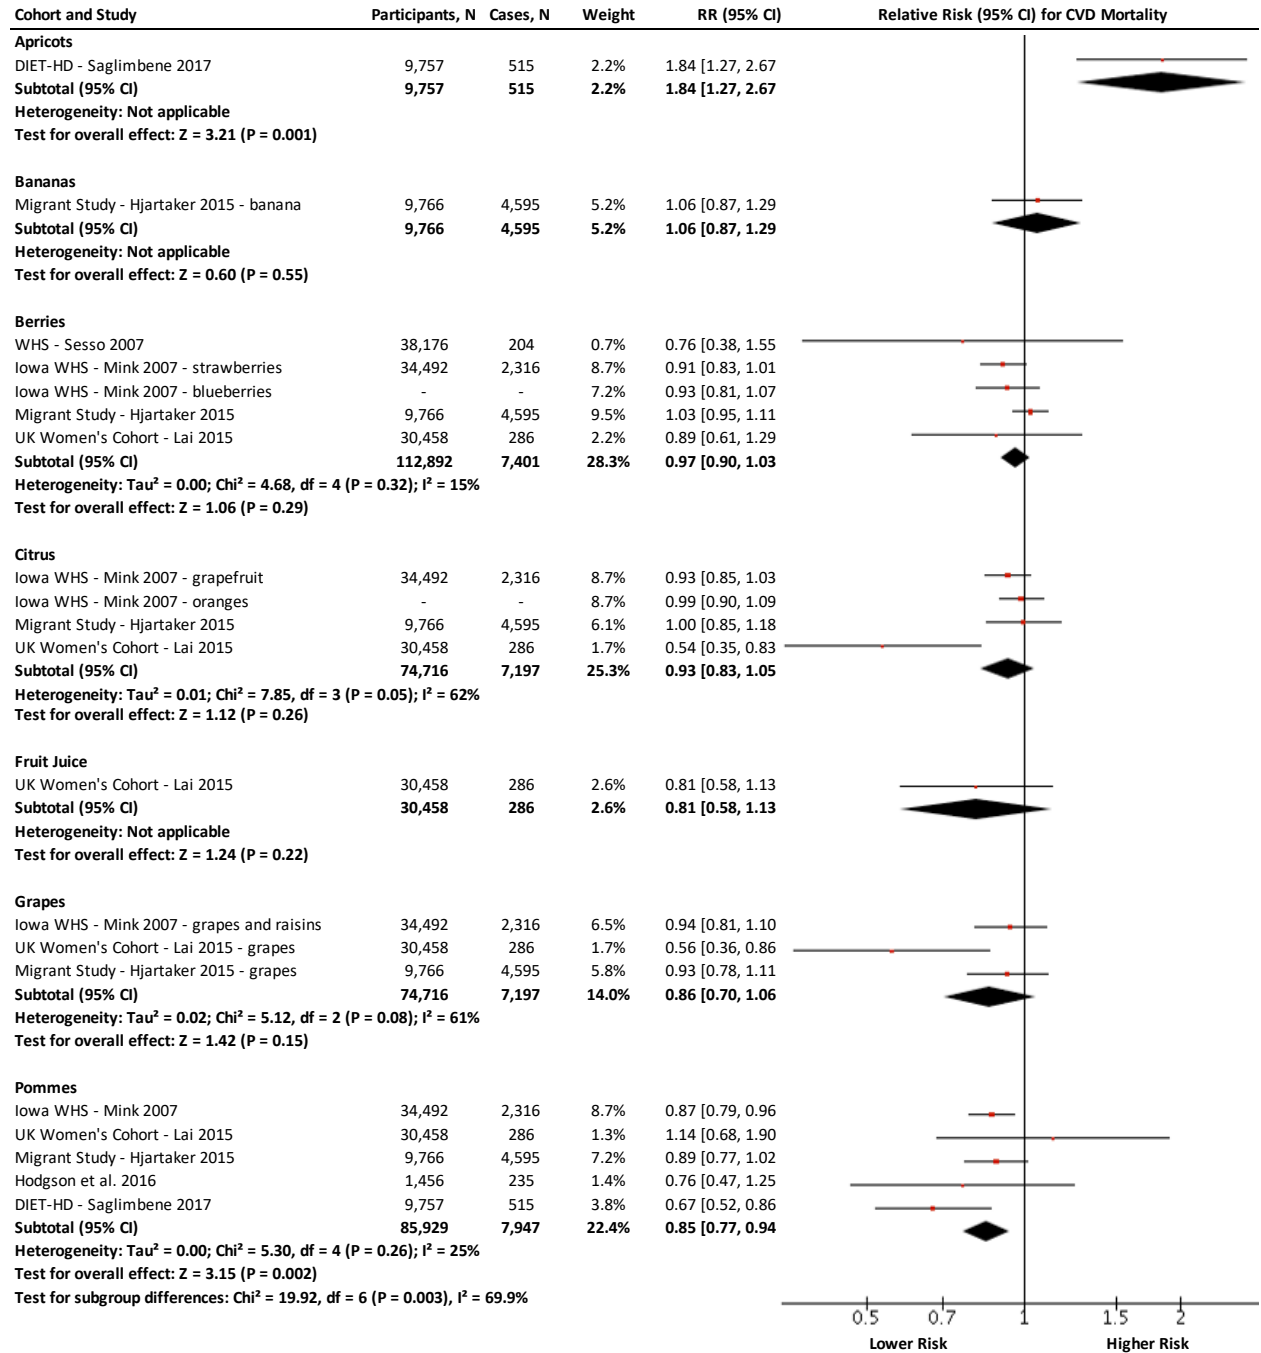

**Figure S31.** Relation between sources of fruit and CVD mortality (highest vs. lowest level of intake). All results are presented as relative risk (RR) with 95% confidence intervals (95% CI). Pooled risk estimate is represented by the black diamond using (A) fixed effects and (B) random effects models. Inter-study heterogeneity was assessed using the Cochran Q statistic (Chi<sup>2</sup>) at a significance level of p<0.10, and quantified by I<sup>2</sup>, with values ≥ 50% indicating substantial heterogeneity.

## A. Fixed Effects

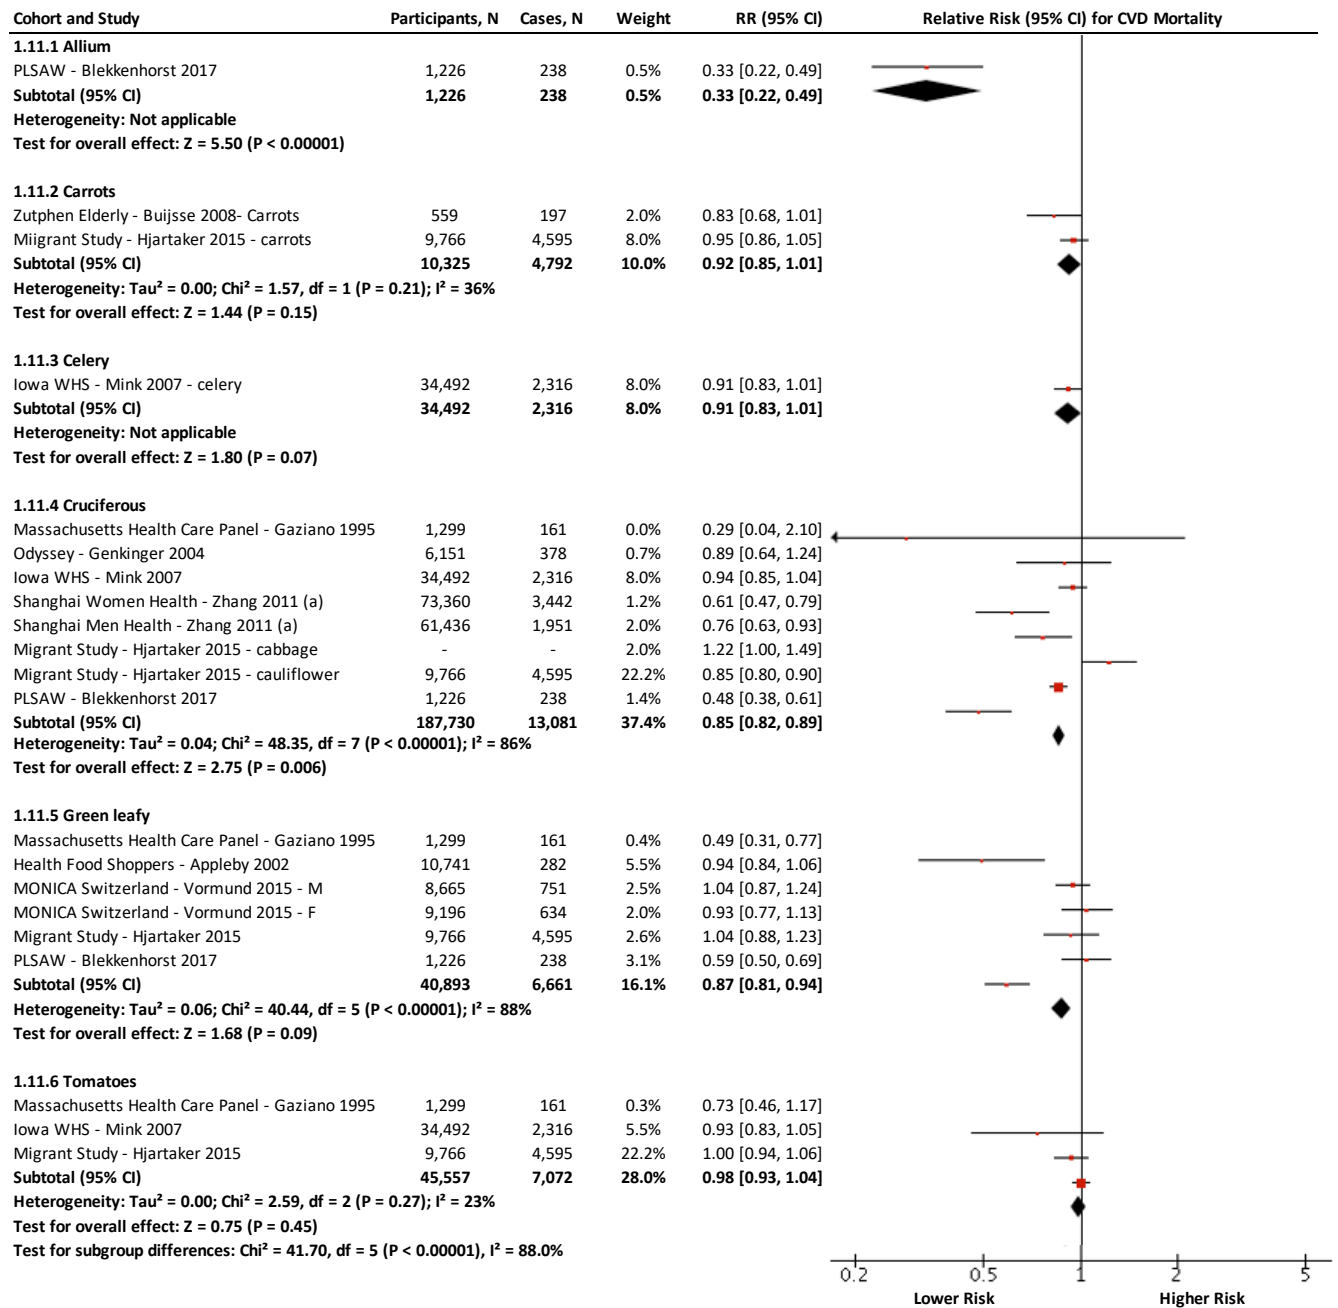

## B. Random Effects

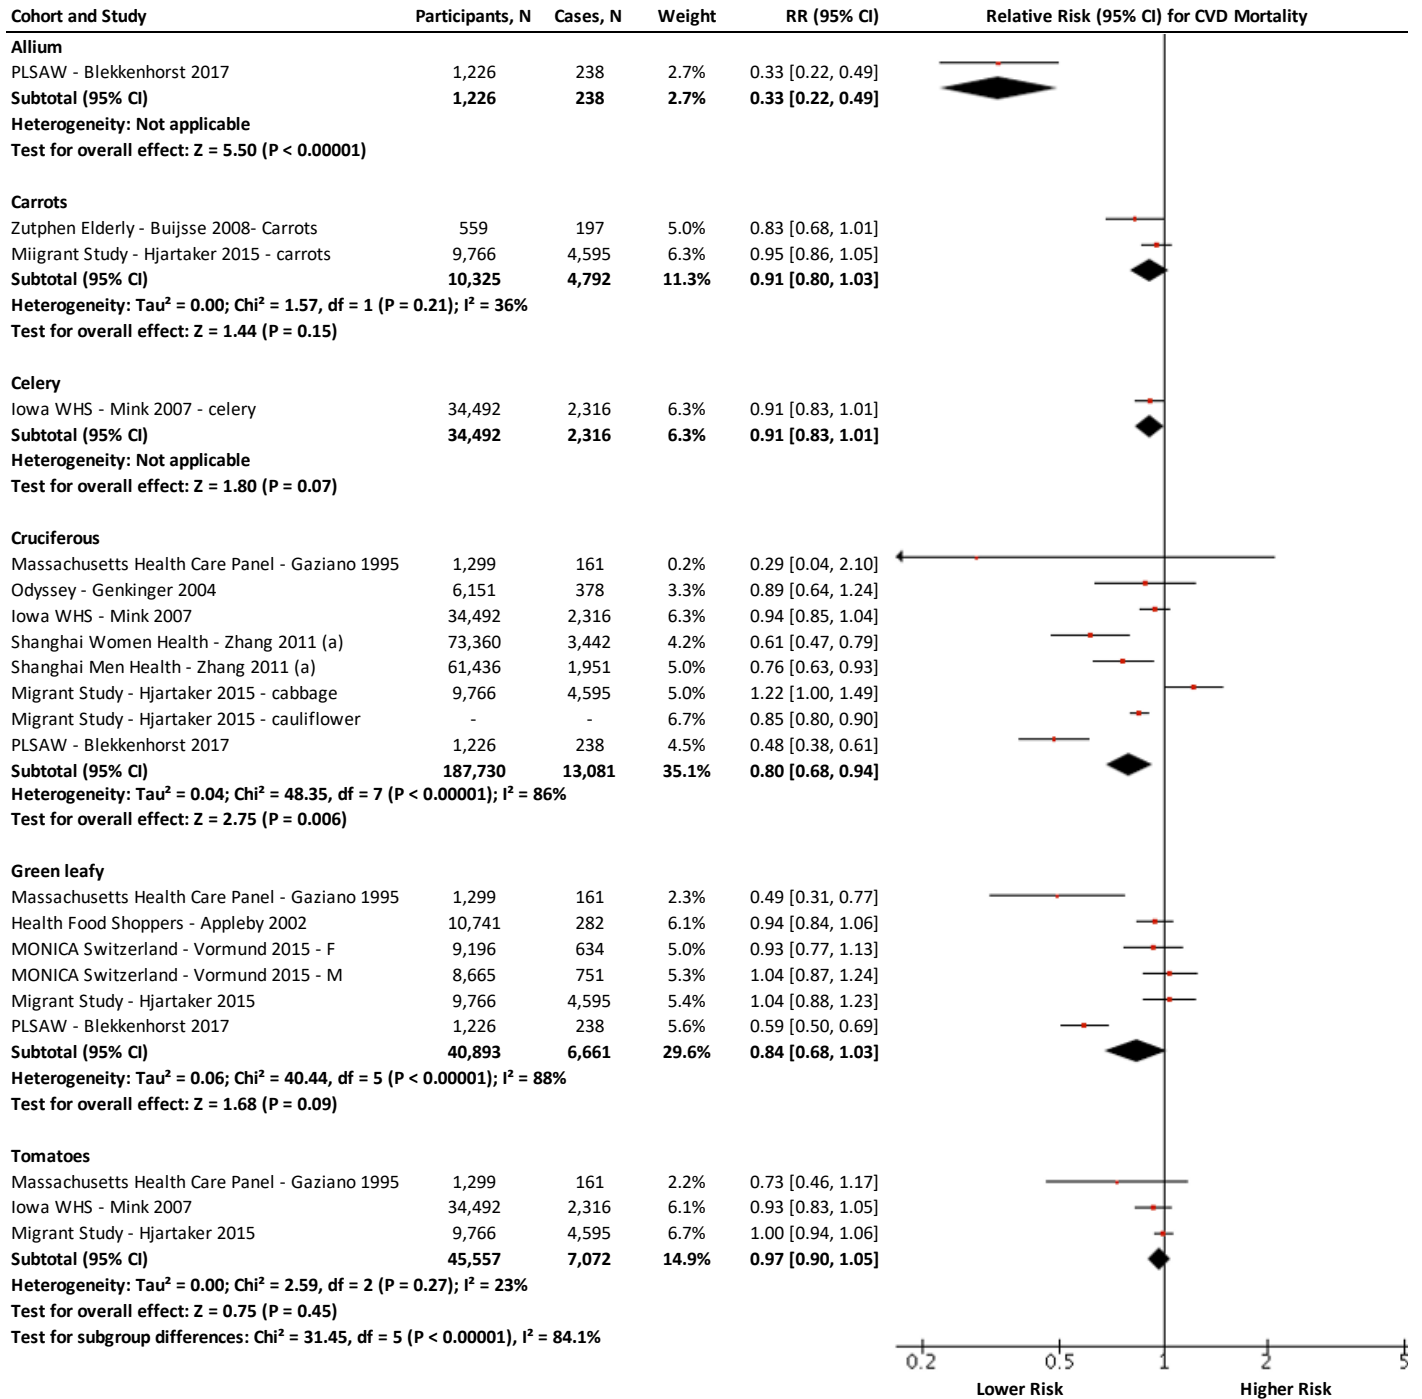

**Figure S32.** Relation between sources of vegetables and CVD mortality (highest vs. lowest level of intake). All results are presented as relative risk (RR) with 95% confidence intervals (95% CI). Pooled risk estimate is represented by the black diamond using (A) fixed effects and (B) random effects models. Inter-study heterogeneity was assessed using the Cochran Q statistic (Chi<sup>2</sup>) at a significance level of p<0.10, and quantified by I<sup>2</sup>, with values ≥ 50% indicating substantial heterogeneity.

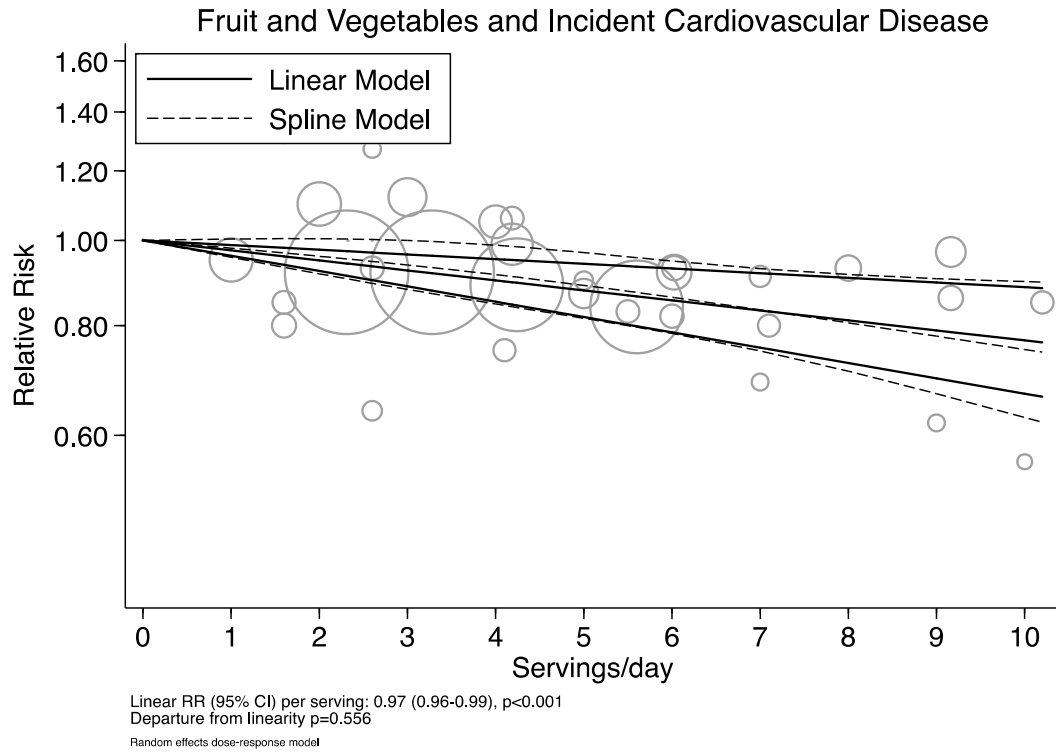

**Figure S33.** Linear and cubic-spline dose-response relation between increasing fruit and vegetable intake and incidence of cardiovascular disease. Linear dose-response data was modeled using the Greenland and Longnecker method to estimate the covariances of multivariable-adjusted relative risk. Cubic spline data were modeled with fixed-effects restricted cubic spline with 3 knots and using the Greenland and Longnecker method to estimate the covariances of multivariable-adjusted relative risk. All data was kept on the original dose scale. The fitted trend for each model is represented by a central line (solid lines for linear model; dashed lines for cubic spline model) with 95% confidence intervals represented by the outer lines. Individual observations are represented by the circles, with the weight of the study in the overall analysis represented by the size of the circles.

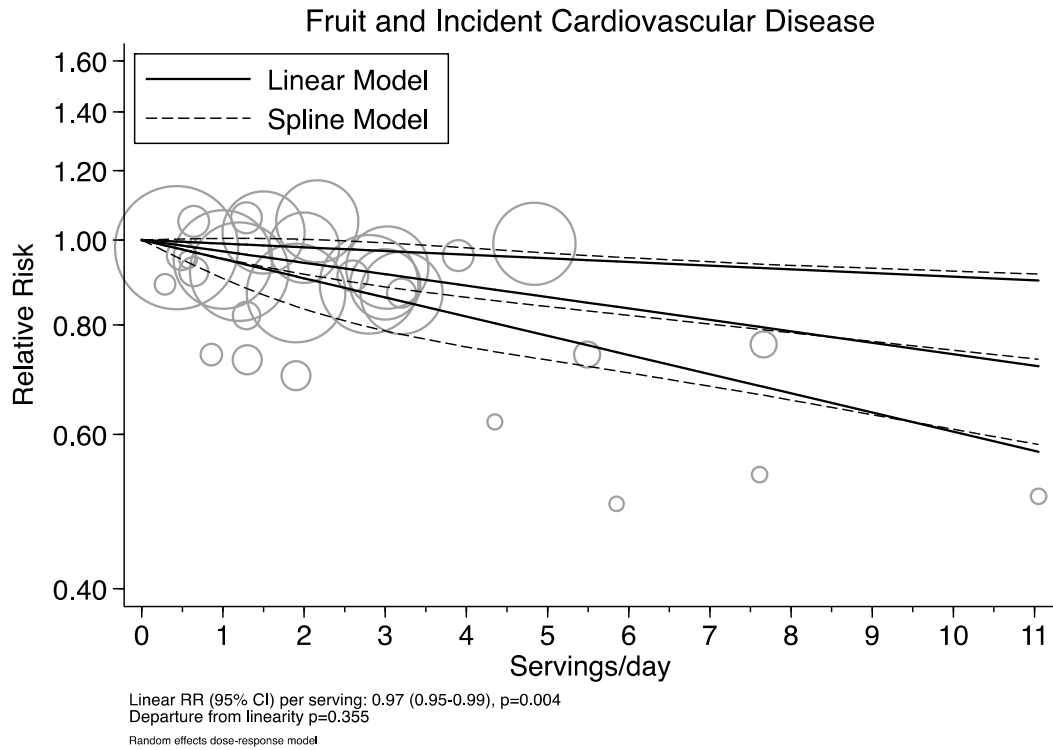

**Figure S34.** Linear and cubic-spline dose-response relation between increasing fruit intake and incidence of cardiovascular disease. Linear dose-response data was modeled using the Greenland and Longnecker<sup>23</sup> method to estimate the covariances of multivariable-adjusted relative risk. Cubic spline data were modeled with fixed-effects restricted cubic spline with 3 knots and using the Greenland and Longnecker<sup>23</sup> method to estimate the covariances of multivariable-adjusted relative risk. All data was kept on the original dose scale. The fitted trend for each model is represented by a central line (solid lines for linear model; dashed lines for cubic spline model) with 95% confidence intervals represented by the outer lines. Individual observations are represented by the circles, with the weight of the study in the overall analysis represented by the size of the circles.

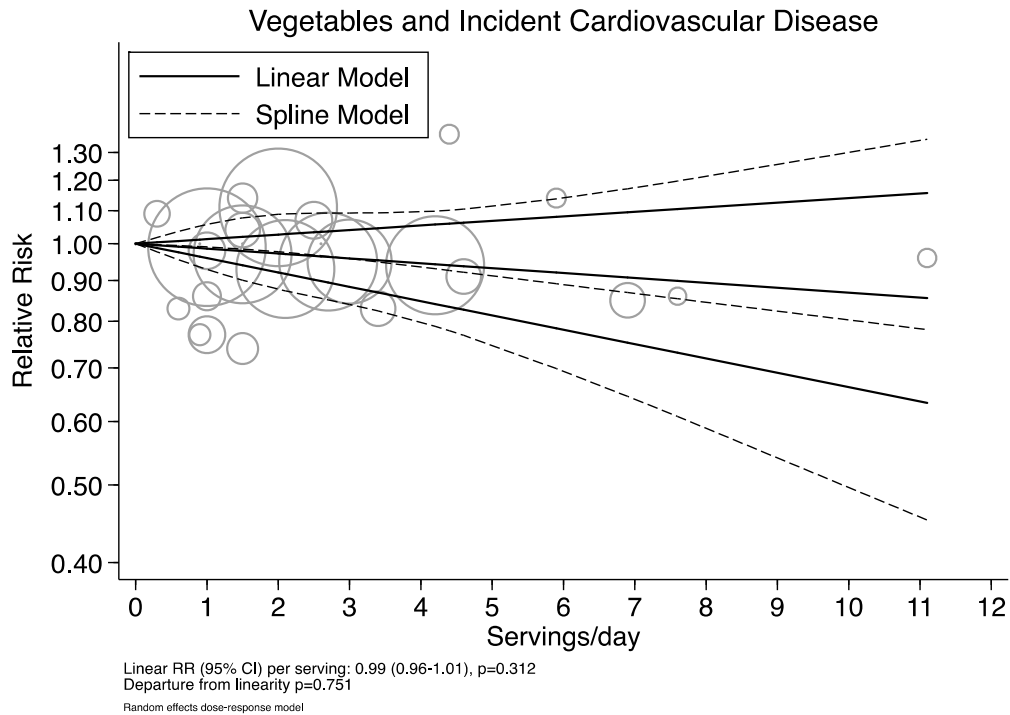

**Figure S35.** Linear and cubic-spline dose-response relation between increasing intake of vegetables and incidence of cardiovascular disease. Linear dose-response data was modeled using the Greenland and Longnecker<sup>23</sup> method to estimate the covariances of multivariable-adjusted relative risk. Cubic spline data were modeled with fixed-effects restricted cubic spline with 3 knots and using the Greenland and Longnecker<sup>23</sup> method to estimate the covariances of multivariable-adjusted relative risk. All data was kept on the original dose scale. The fitted trend for each model is represented by a central line (solid lines for linear model; dashed lines for cubic spline model) with 95% confidence intervals represented by the outer lines. Individual observations are represented by the circles, with the weight of the study in the overall analysis represented by the size of the circles.

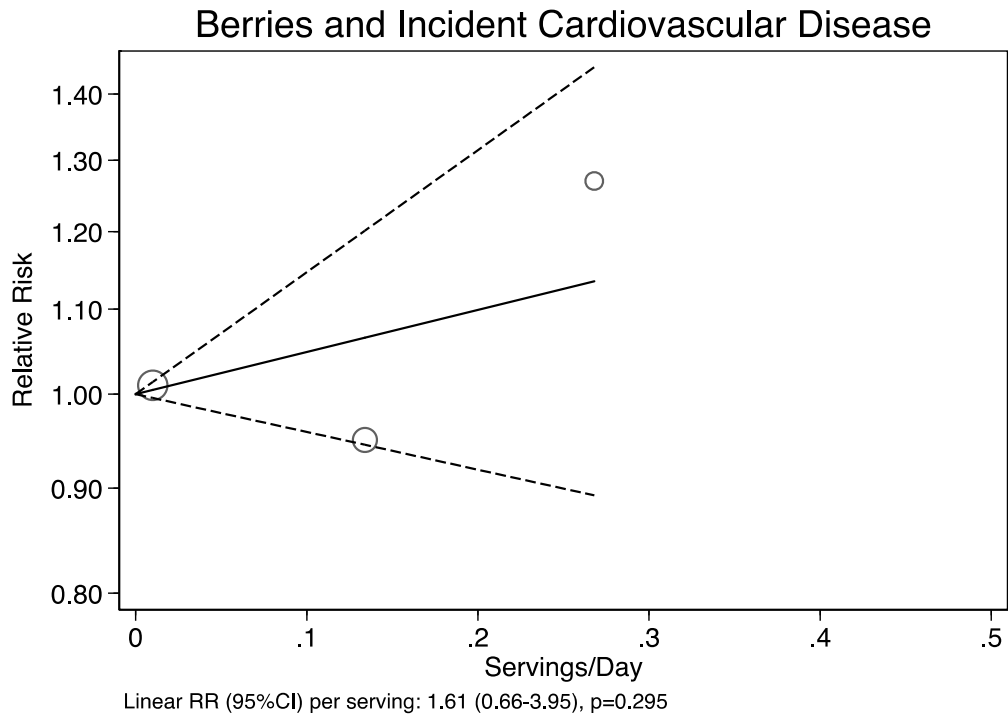

**Figure S36.** Linear dose-response relation between increasing berries intake and incidence of cardiovascular disease. Linear dose-response data was modeled using the Greenland and Longnecker<sup>23</sup> method to estimate the covariances of multivariable-adjusted relative risk, with kept on the original dose scale. Dashed lines represent the pointwise 95% confidence intervals for the fitted linear trend represented by a solid line. Individual observations are represented by the circles, with the weight of the study in the overall analysis represented by the size of the circles.

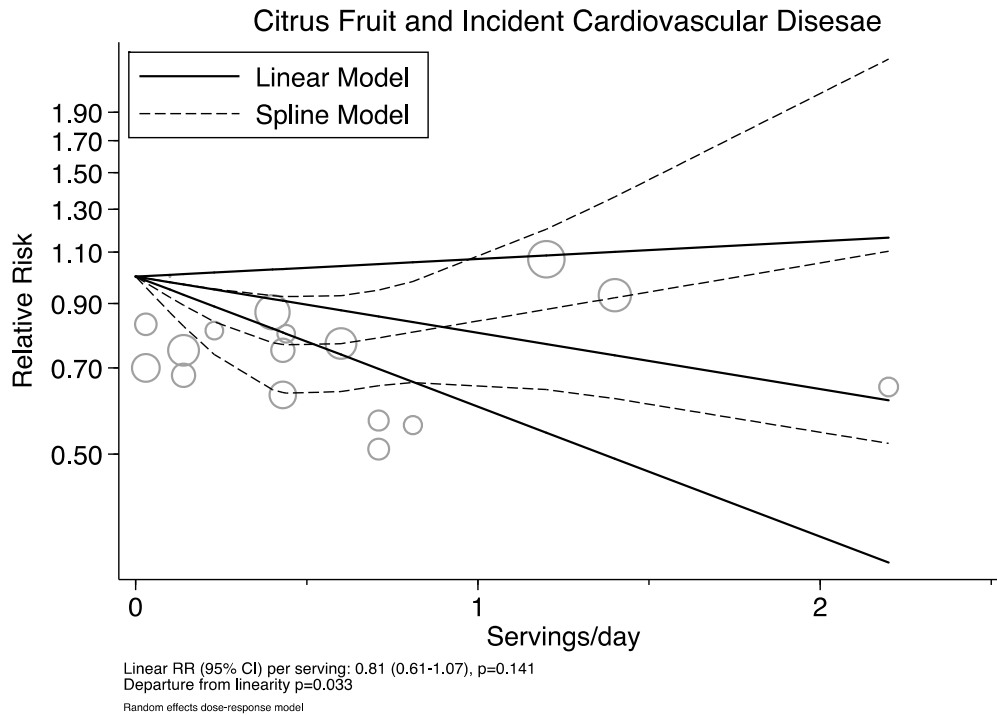

**Figure S37.** Linear and cubic-spline dose-response relation between increasing citrus fruit intake and incidence of cardiovascular disease. Linear dose-response data was modeled using the Greenland and Longnecker<sup>23</sup> method to estimate the covariances of multivariable-adjusted relative risk. Cubic spline data were modeled with fixed-effects restricted cubic spline with 3 knots and using the Greenland and Longnecker<sup>23</sup> method to estimate the covariances of multivariable-adjusted relative risk. All data was kept on the original dose scale. The fitted trend for each model is represented by a central line (solid lines for linear model; dashed lines for cubic spline model) with 95% confidence intervals represented by the outer lines. Individual observations are represented by the circles, with the weight of the study in the overall analysis represented by the size of the circles.



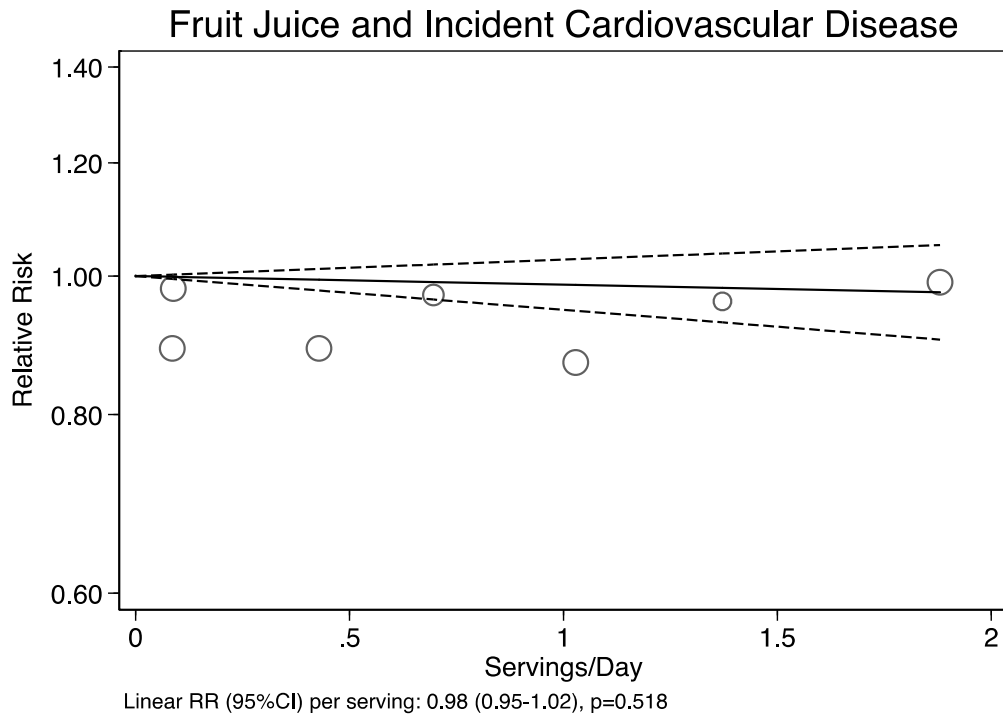

**Figure S38.** Linear and cubic-spline dose-response relation between increasing fruit juice intake and incidence of cardiovascular disease. Linear dose-response data was modeled using the Greenland and Longnecker<sup>23</sup> method to estimate the covariances of multivariable-adjusted relative risk. Cubic spline data were modeled with fixed-effects restricted cubic spline with 3 knots and using the Greenland and Longnecker<sup>23</sup> method to estimate the covariances of multivariable-adjusted relative risk. All data was kept on the original dose scale. The fitted trend for each model is represented by a central line (solid lines for linear model; dashed lines for cubic spline model) with 95% confidence intervals represented by the outer lines. Individual observations are represented by the circles, with the weight of the study in the overall analysis represented by the size of the circles.

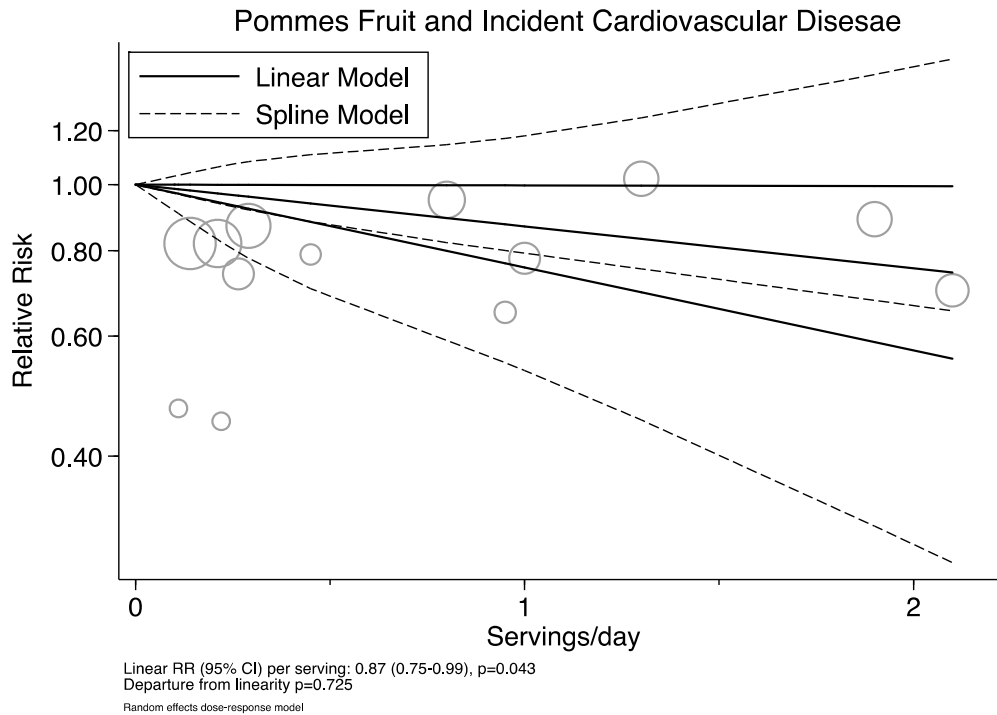

**Figure S39.** Linear dose-response relation between increasing pommes intake and incidence of cardiovascular disease. Linear dose-response data was modeled using the Greenland and Longnecker<sup>23</sup> method to estimate the covariances of multivariable-adjusted relative risk, with kept on the original dose scale. Dashed lines represent the pointwise 95% confidence intervals for the fitted linear trend represented by a solid line. Individual observations are represented by the circles, with the weight of the study in the overall analysis represented by the size of the circles.

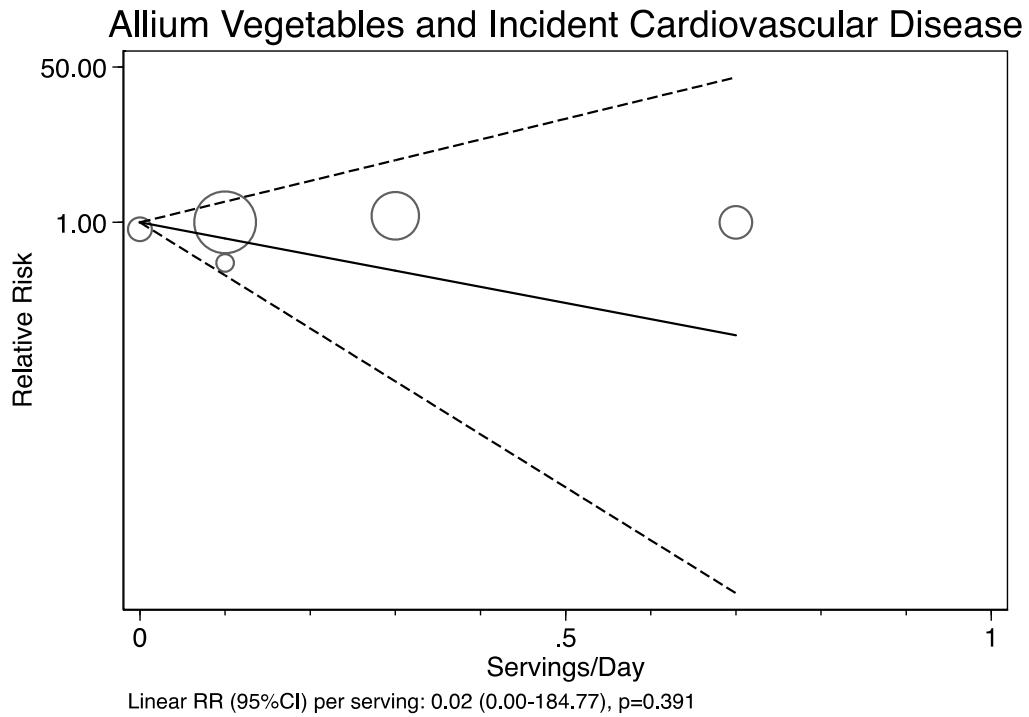

**Figure S40.** Linear dose-response relation between increasing intake of allium vegetables and incidence of cardiovascular disease. Linear dose-response data was modeled using the Greenland and Longnecker<sup>23</sup> method to estimate the covariances of multivariable-adjusted relative risk, with kept on the original dose scale. Dashed lines represent the pointwise 95% confidence intervals for the fitted linear trend represented by a solid line. Individual observations are represented by the circles, with the weight of the study in the overall analysis represented by the size of the circles.

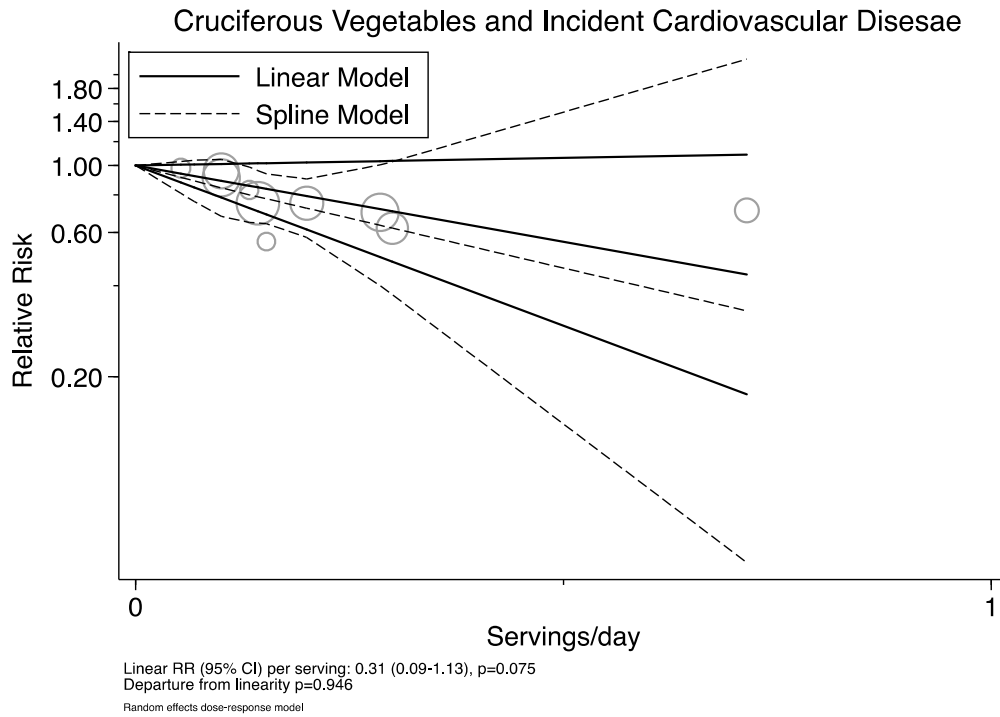

**Figure S41.** Linear dose-response relation between increasing intake of cruciferous vegetables and incidence of cardiovascular disease y. Linear dose-response data was modeled using the Greenland and Longnecker<sup>23</sup> method to estimate the covariances of multivariable-adjusted relative risk, with kept on the original dose scale. Dashed lines represent the pointwise 95% confidence intervals for the fitted linear trend represented by a solid line. Individual observations are represented by the circles, with the weight of the study in the overall analysis represented by the size of the circles.

## Green Leafy Vegetables and Incident Cardiovascular Diseases

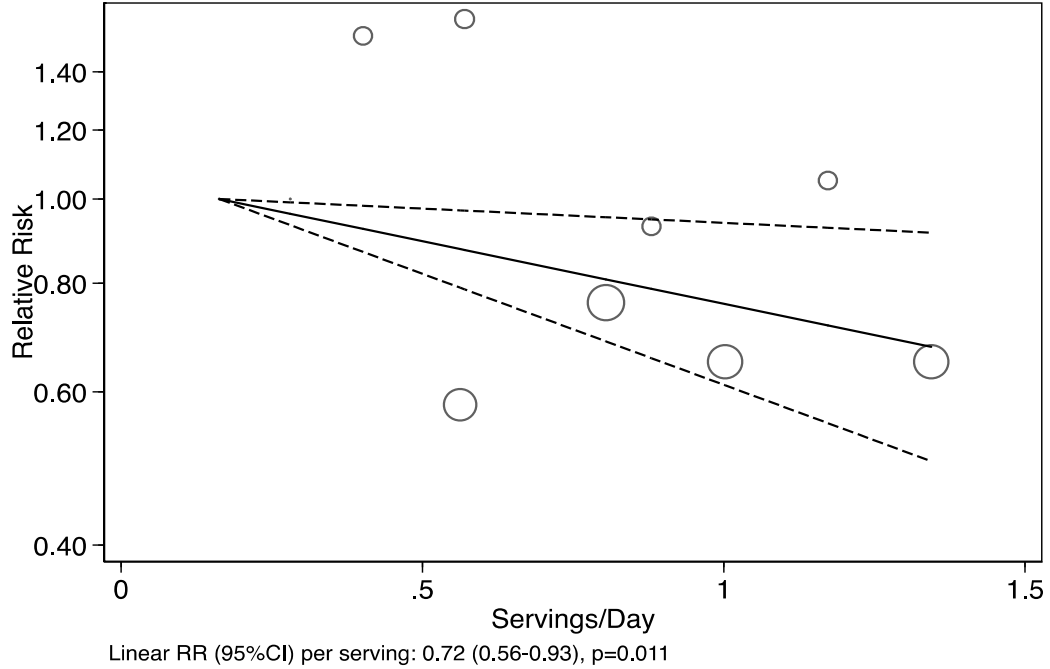

**Figure S42.** Linear dose-response relation between increasing intake of green leafy vegetables and incidence of cardiovascular disease. Linear dose-response data was modeled using the Greenland and Longnecker<sup>23</sup> method to estimate the covariances of multivariable-adjusted relative risk, with kept on the original dose scale. Dashed lines represent the pointwise 95% confidence intervals for the fitted linear trend represented by a solid line. Individual observations are represented by the circles, with the weight of the study in the overall analysis represented by the size of the circles.

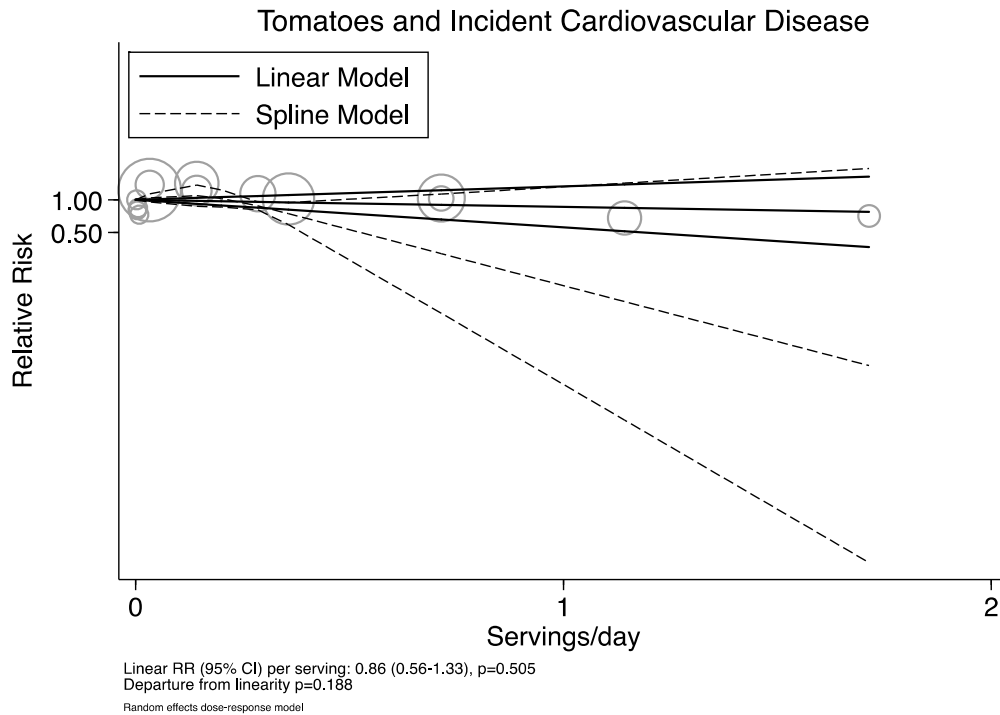

**Figure S43.** Linear and cubic-spline dose-response relation between increasing tomato intake and incidence of cardiovascular disease. Linear dose-response data was modeled using the Greenland and Longnecker<sup>23</sup> method to estimate the covariances of multivariable-adjusted relative risk. Cubic spline data were modeled with fixed-effects restricted cubic spline with 3 knots and using the Greenland and Longnecker<sup>23</sup> method to estimate the covariances of multivariable-adjusted relative risk. All data was kept on the original dose scale. The fitted trend for each model is represented by a central line (solid lines for linear model; dashed lines for cubic spline model) with 95% confidence intervals represented by the outer lines. Individual observations are represented by the circles, with the weight of the study in the overall analysis represented by the size of the circles.

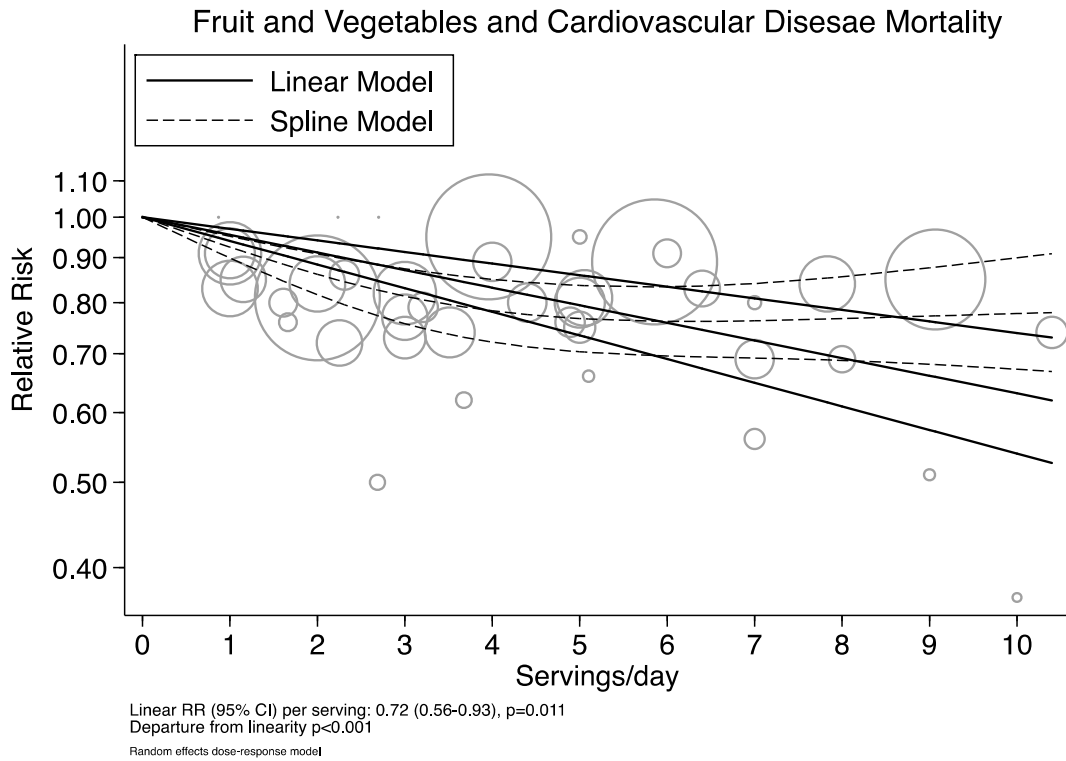

**Figure S44.** Linear and cubic-spline dose-response relation between increasing fruit and vegetable intake and cardiovascular disease mortality. Linear dose-response data was modeled using the Greenland and Longnecker<sup>23</sup> method to estimate the covariances of multivariable-adjusted relative risk. Cubic spline data were modeled with fixed-effects restricted cubic spline with 3 knots and using the Greenland and Longnecker<sup>23</sup> method to estimate the covariances of multivariable-adjusted relative risk. All data was kept on the original dose scale. The fitted trend for each model is represented by a central line (solid lines for linear model; dashed lines for cubic spline model) with 95% confidence intervals represented by the outer lines. Individual observations are represented by the circles, with the weight of the study in the overall analysis represented by the size of the circles.

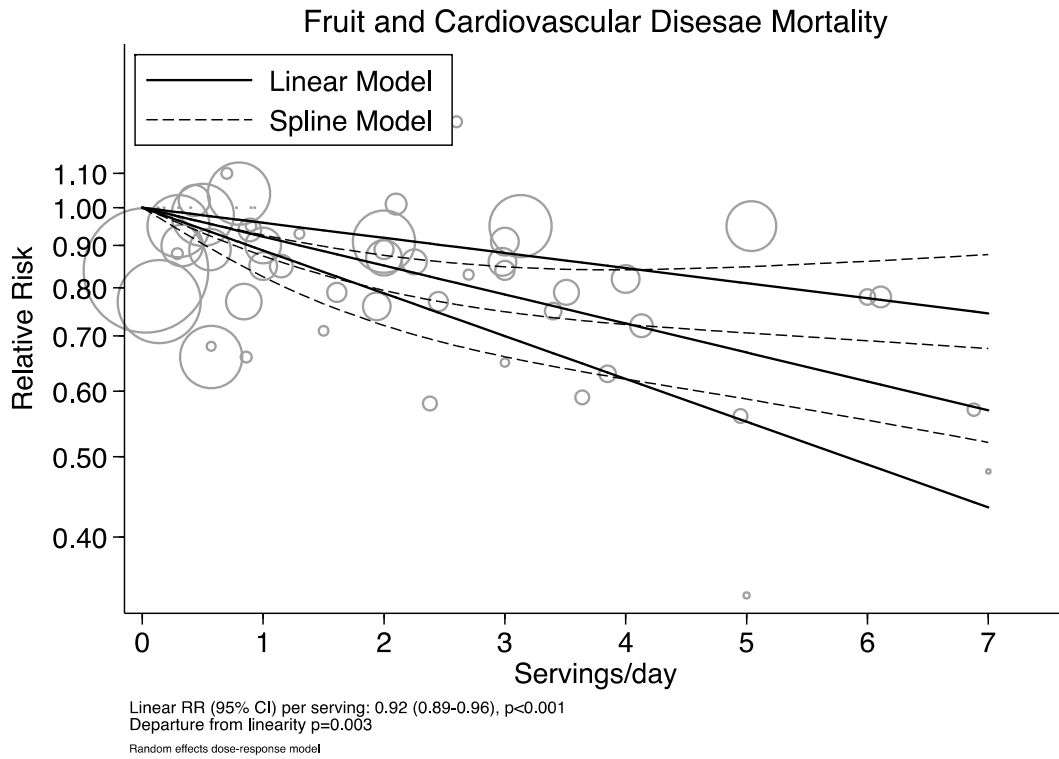

**Figure S45.** Linear and cubic-spline dose-response relation between increasing fruit intake and cardiovascular disease mortality. Linear dose-response data was modeled using the Greenland and Longnecker<sup>23</sup> method to estimate the covariances of multivariable-adjusted relative risk. Cubic spline data were modeled with fixed-effects restricted cubic spline with 3 knots and using the Greenland and Longnecker<sup>23</sup> method to estimate the covariances of multivariable-adjusted relative risk. All data was kept on the original dose scale. The fitted trend for each model is represented by a central line (solid lines for linear model; dashed lines for cubic spline model) with 95% confidence intervals represented by the outer lines. Individual observations are represented by the circles, with the weight of the study in the overall analysis represented by the size of the circles.



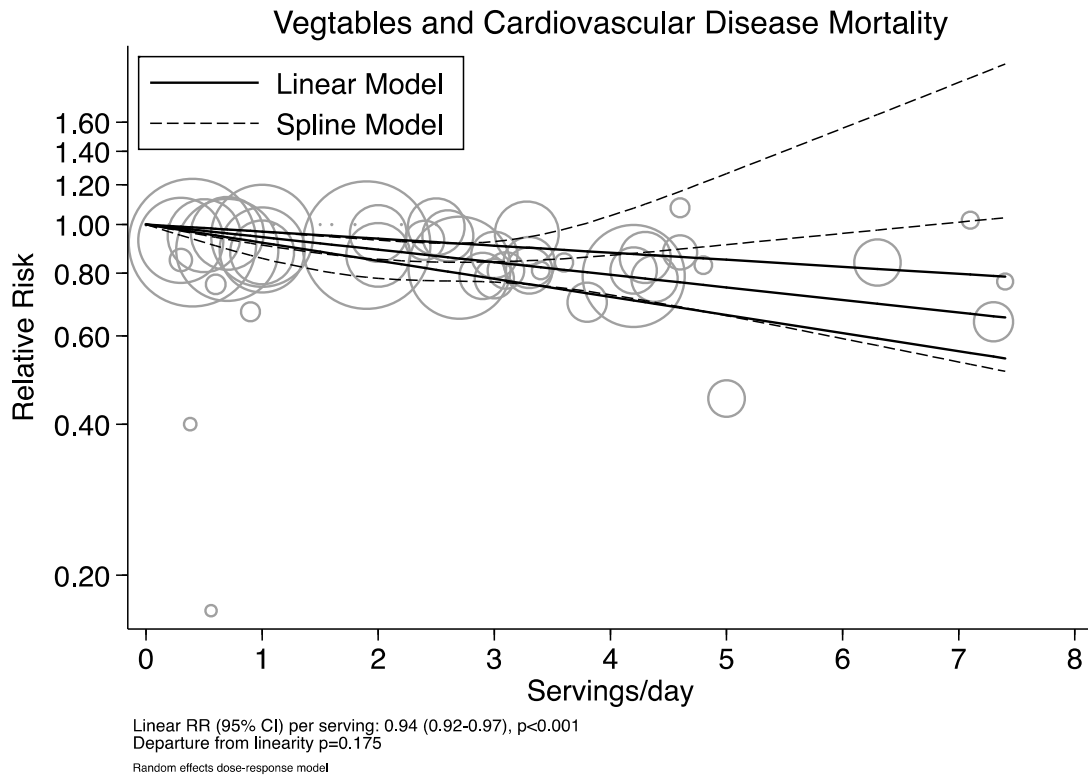

**Figure S46.** Linear and cubic-spline dose-response relation between increasing intake of vegetables and cardiovascular disease mortality. Linear dose-response data was modeled using the Greenland and Longnecker<sup>23</sup> method to estimate the covariances of multivariable-adjusted relative risk. Cubic spline data were modeled with fixed-effects restricted cubic spline with 3 knots and using the Greenland and Longnecker<sup>23</sup> method to estimate the covariances of multivariable-adjusted relative risk. All data was kept on the original dose scale. The fitted trend for each model is represented by a central line (solid lines for linear model; dashed lines for cubic spline model) with 95% confidence intervals represented by the outer lines. Individual observations are represented by the circles, with the weight of the study in the overall analysis represented by the size of the circles.

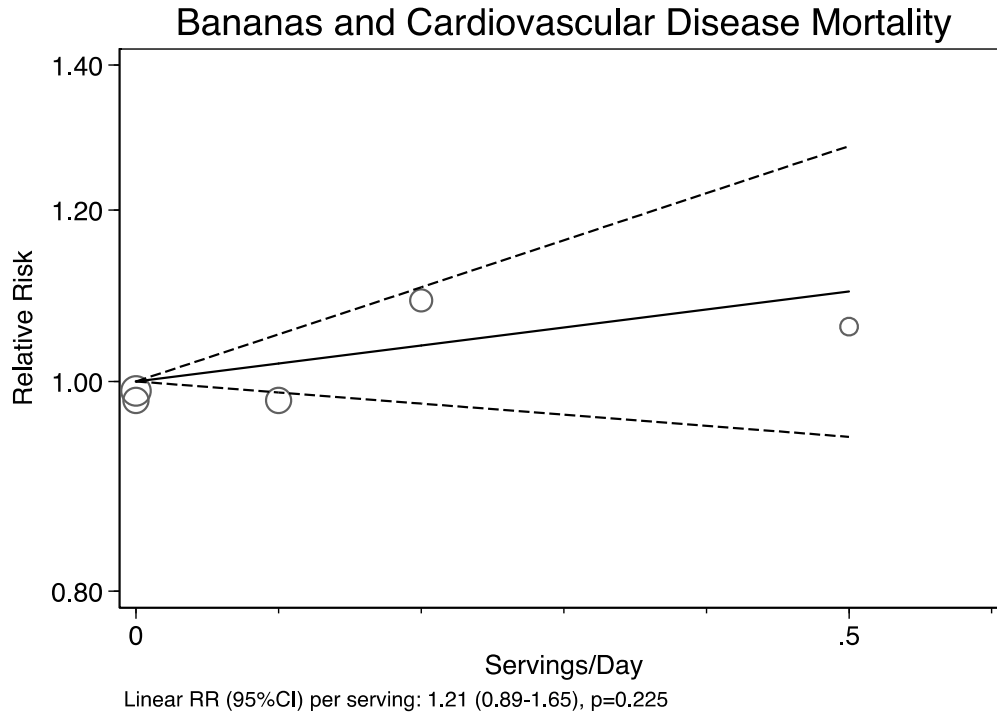

**Figure S47.** Linear dose-response relation between increasing banana intake and cardiovascular disease mortality. Linear dose-response data was modeled using the Greenland and Longnecker<sup>23</sup> method to estimate the covariances of multivariable-adjusted relative risk, with kept on the original dose scale. Dashed lines represent the pointwise 95% confidence intervals for the fitted linear trend represented by a solid line. Individual observations are represented by the circles, with the weight of the study in the overall analysis represented by the size of the circles.

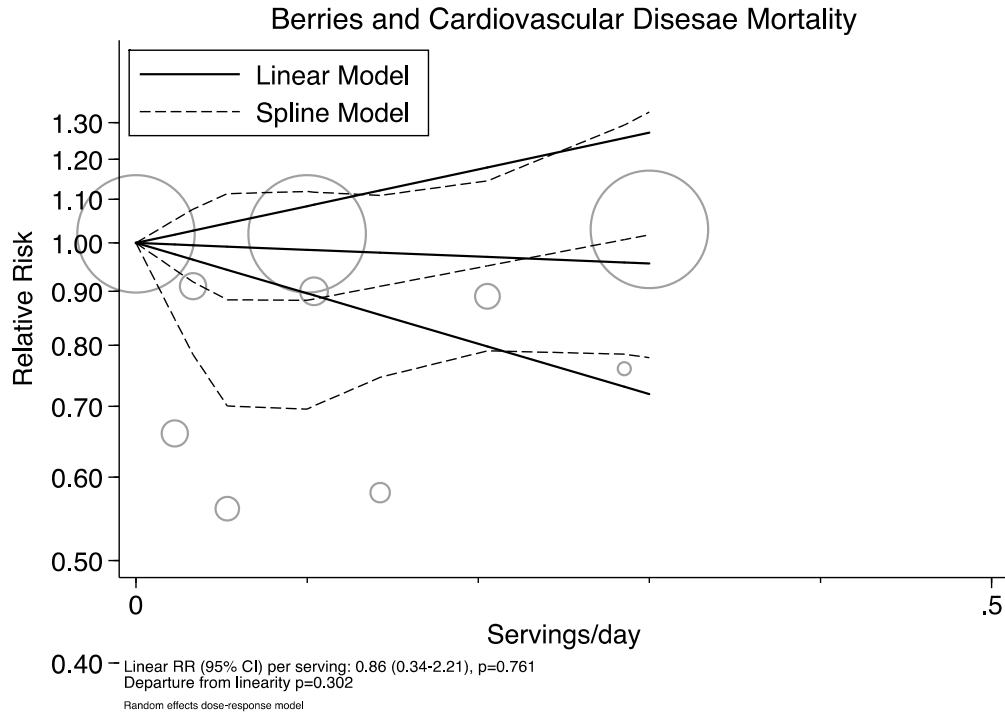

**Figure S48.** Linear and cubic-spline dose-response relation between increasing berry fruit intake and cardiovascular disease mortality. Linear dose-response data was modeled using the Greenland and Longnecker<sup>23</sup> method to estimate the covariances of multivariable-adjusted relative risk. Cubic spline data were modeled with fixed-effects restricted cubic spline with 3 knots and using the Greenland and Longnecker<sup>23</sup> method to estimate the covariances of multivariable-adjusted relative risk. All data was kept on the original dose scale. The fitted trend for each model is represented by a central line (solid lines for linear model; dashed lines for cubic spline model) with 95% confidence intervals represented by the outer lines. Individual observations are represented by the circles, with the weight of the study in the overall analysis represented by the size of the circles.

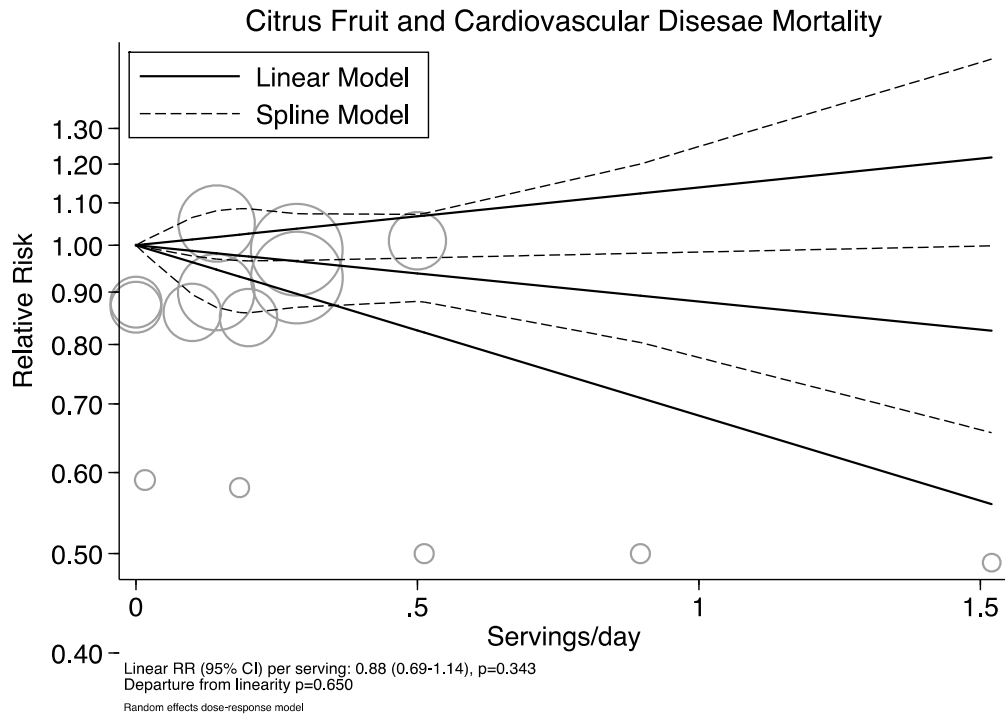

**Figure S49.** Linear and cubic-spline dose-response relation between increasing citrus fruit intake and cardiovascular disease mortality. Linear dose-response data was modeled using the Greenland and Longnecker<sup>23</sup> method to estimate the covariances of multivariable-adjusted relative risk. Cubic spline data were modeled with fixed-effects restricted cubic spline with 3 knots and using the Greenland and Longnecker<sup>23</sup> method to estimate the covariances of multivariable-adjusted relative risk. All data was kept on the original dose scale. The fitted trend for each model is represented by a central line (solid lines for linear model; dashed lines for cubic spline model) with 95% confidence intervals represented by the outer lines. Individual observations are represented by the circles, with the weight of the study in the overall analysis represented by the size of the circles.

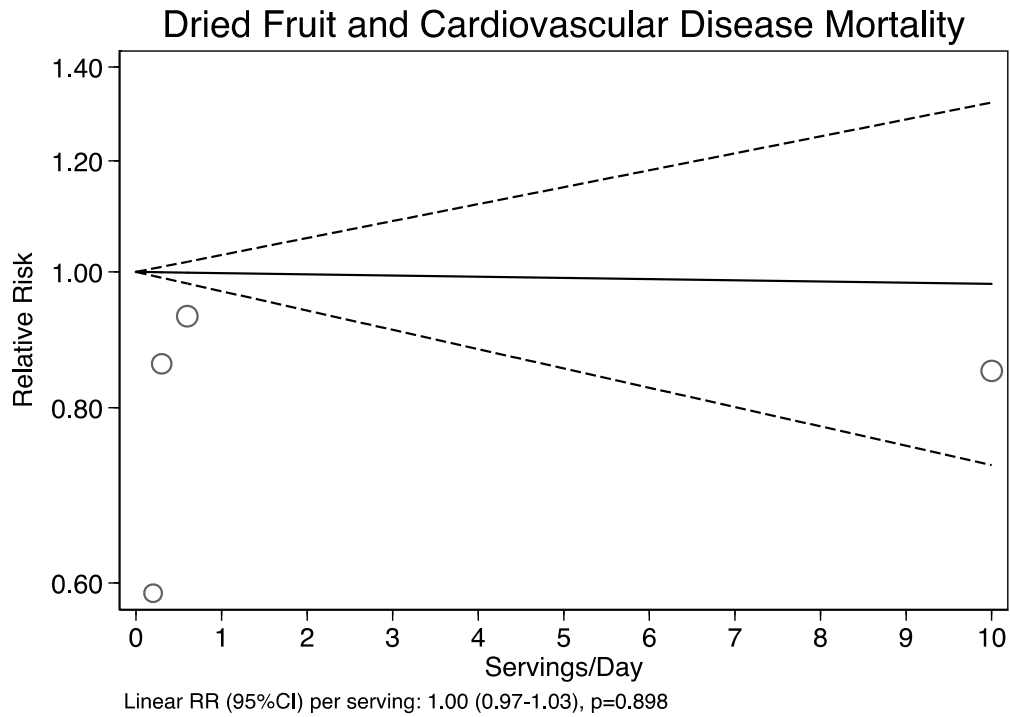

**Figure S50.** Linear and cubic-spline dose-response relation between increasing dried fruit intake and cardiovascular disease mortality. Linear dose-response data was modeled using the Greenland and Longnecker<sup>23</sup> method to estimate the covariances of multivariable-adjusted relative risk. Cubic spline data were modeled with fixed-effects restricted cubic spline with 3 knots and using the Greenland and Longnecker<sup>23</sup> method to estimate the covariances of multivariable-adjusted relative risk. All data was kept on the original dose scale. The fitted trend for each model is represented by a central line (solid lines for linear model; dashed lines for cubic spline model) with 95% confidence intervals represented by the outer lines. Individual observations are represented by the circles, with the weight of the study in the overall analysis represented by the size of the circles.

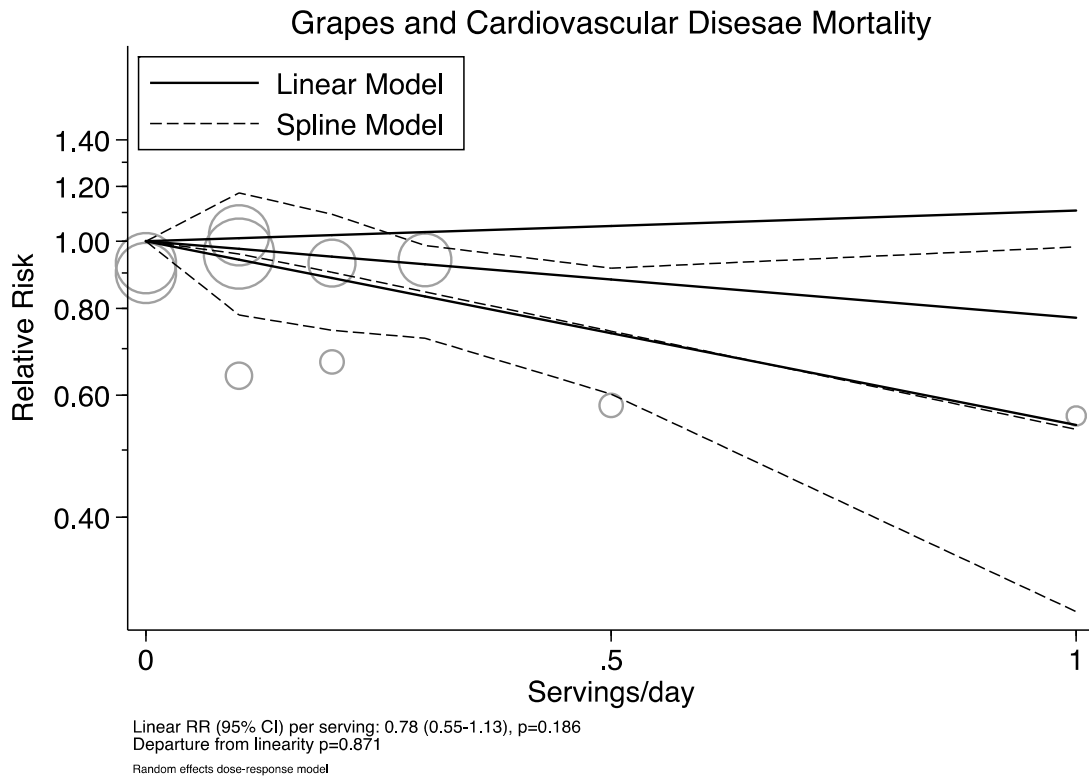

**Figure S51.** Linear and cubic-spline dose-response relation between increasing grapes intake and cardiovascular disease mortality. Linear dose-response data was modeled using the Greenland and Longnecker<sup>23</sup> method to estimate the covariances of multivariable-adjusted relative risk. Cubic spline data were modeled with fixed-effects restricted cubic spline with 3 knots and using the Greenland and Longnecker<sup>23</sup> method to estimate the covariances of multivariable-adjusted relative risk. All data was kept on the original dose scale. The fitted trend for each model is represented by a central line (solid lines for linear model; dashed lines for cubic spline model) with 95% confidence intervals represented by the outer lines. Individual observations are represented by the circles, with the weight of the study in the overall analysis represented by the size of the circles.

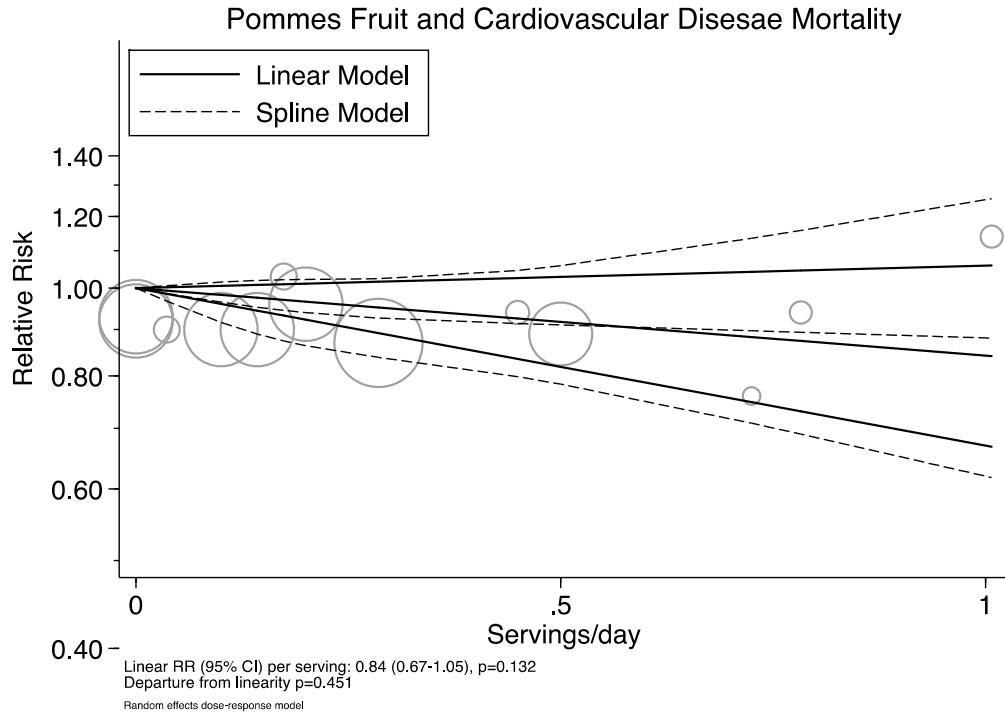

**Figure S52.** Linear and cubic-spline dose-response relation between increasing pommes intake and cardiovascular disease mortality. Linear dose-response data was modeled using the Greenland and Longnecker<sup>23</sup> method to estimate the covariances of multivariable-adjusted relative risk. Cubic spline data were modeled with fixed-effects restricted cubic spline with 3 knots and using the Greenland and Longnecker<sup>23</sup> method to estimate the covariances of multivariable-adjusted relative risk. All data was kept on the original dose scale. The fitted trend for each model is represented by a central line (solid lines for linear model; dashed lines for cubic spline model) with 95% confidence intervals represented by the outer lines. Individual observations are represented by the circles, with the weight of the study in the overall analysis represented by the size of the circles.

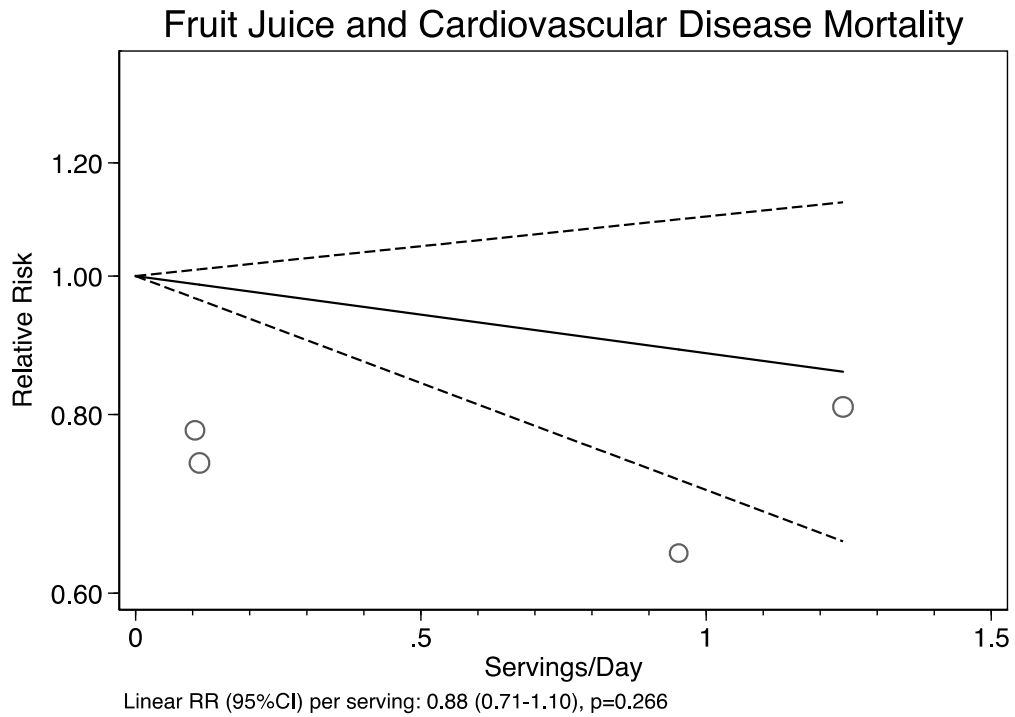

**Figure S53.** Linear dose-response relation between increasing fruit juice intake and cardiovascular disease mortality. Linear dose-response data was modeled using the Greenland and Longnecker<sup>23</sup> method to estimate the covariances of multivariable-adjusted relative risk, with kept on the original dose scale. Dashed lines represent the pointwise 95% confidence intervals for the fitted linear trend represented by a solid line. Individual observations are represented by the circles, with the weight of the study in the overall analysis represented by the size of the circles.



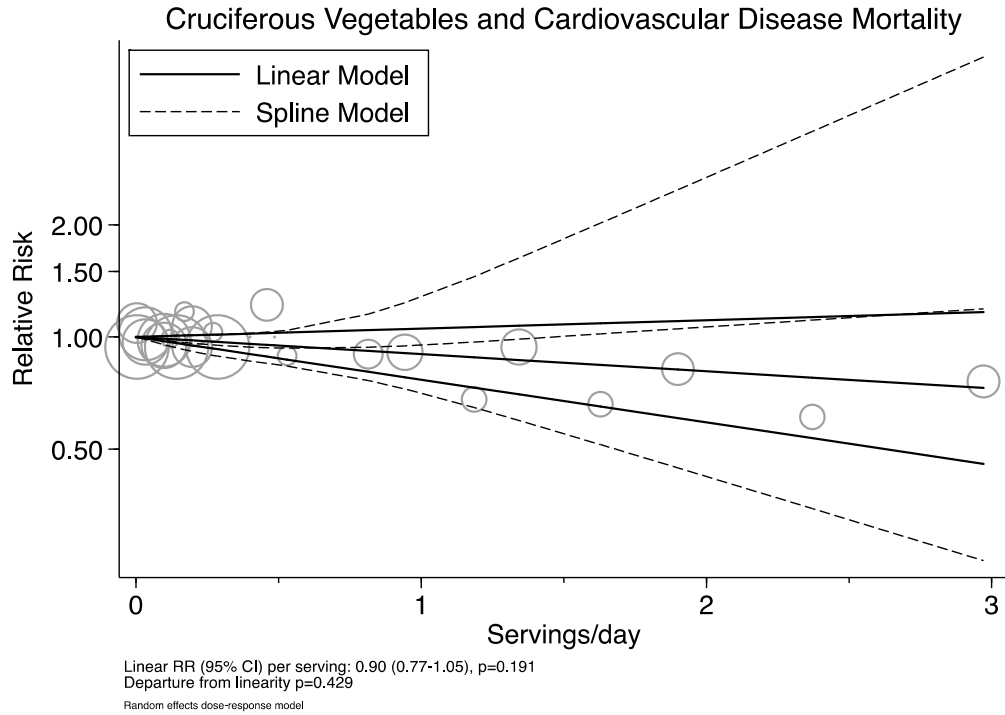

**Figure S54.** Linear and cubic-spline dose-response relation between increasing intake of cruciferous vegetables and cardiovascular disease mortality. Linear dose-response data was modeled using the Greenland and Longnecker<sup>23</sup> method to estimate the covariances of multivariable-adjusted relative risk. Cubic spline data were modeled with fixed-effects restricted cubic spline with 3 knots and using the Greenland and Longnecker<sup>23</sup> method to estimate the covariances of multivariable-adjusted relative risk. All data was kept on the original dose scale. The fitted trend for each model is represented by a central line (solid lines for linear model; dashed lines for cubic spline model) with 95% confidence intervals represented by the outer lines. Individual observations are represented by the circles, with the weight of the study in the overall analysis represented by the size of the circles.

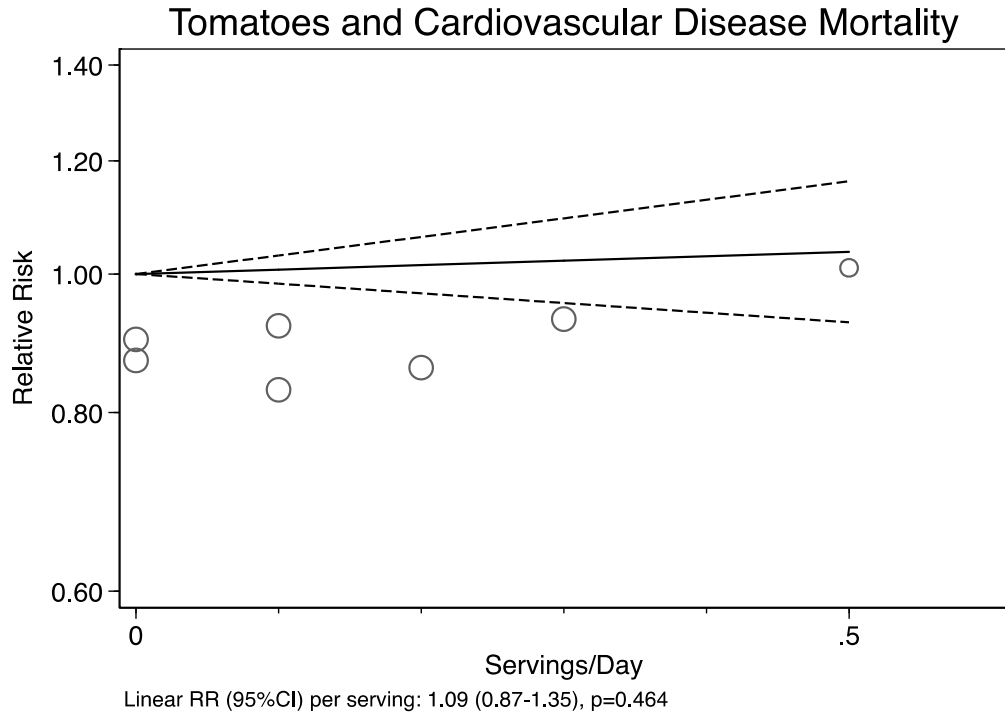

**Figure S55.** Linear dose-response relation between increasing tomato intake and cardiovascular disease mortality. Linear dose-response data was modeled using the Greenland and Longnecker<sup>23</sup> method to estimate the covariances of multivariable-adjusted relative risk, with kept on the original dose scale. Dashed lines represent the pointwise 95% confidence intervals for the fitted linear trend represented by a solid line. Individual observations are represented by the circles, with the weight of the study in the overall analysis represented by the size of the circles.

## TOTAL FRUIT AND VEGETABLES AND CORONARY HEART DISEASE INCIDENCE

### A. Fixed Effects

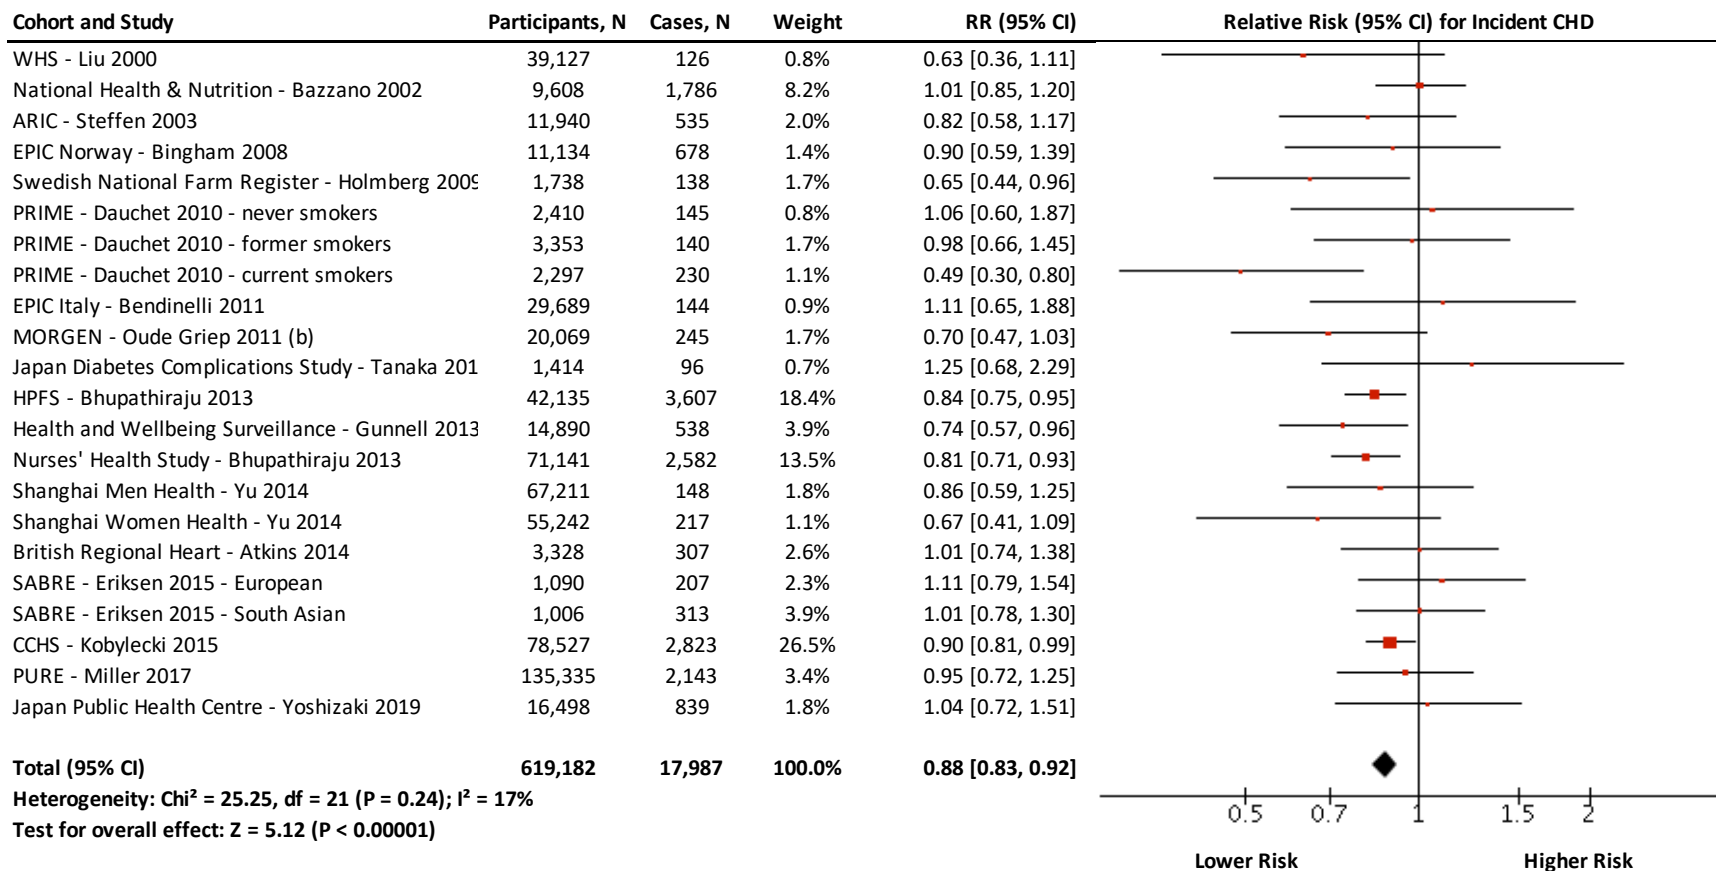

## B. Random Effects

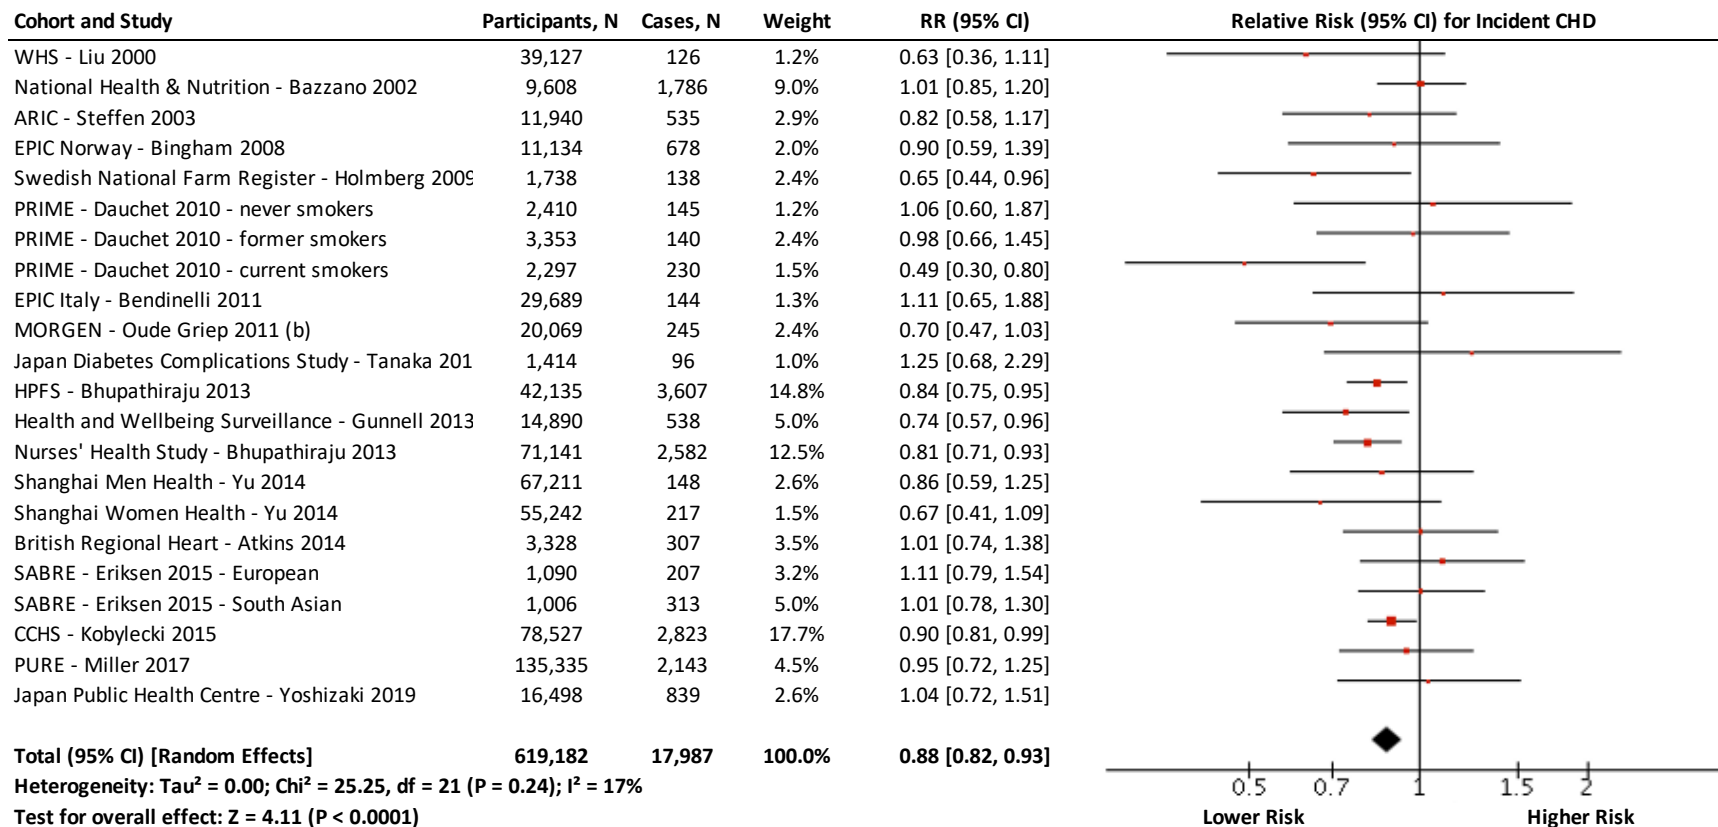

**Figure S56.** Relation between total fruit and vegetables intake and coronary heart disease incidence (highest vs. lowest level of intake). All results are presented as relative risk (RR) with 95% confidence intervals (95% CI). Pooled risk estimate is represented by the black diamond using (A) fixed effects and (B) random effects models. Inter-study heterogeneity was assessed using the Cochran Q statistic ( $\chi^2$ ) at a significance level of  $p < 0.10$ , and quantified by  $I^2$ , with values  $\geq 50\%$  indicating substantial heterogeneity.

## FRUIT AND CORONARY HEART DISEASE INCIDENCE

### A. Fixed Effects

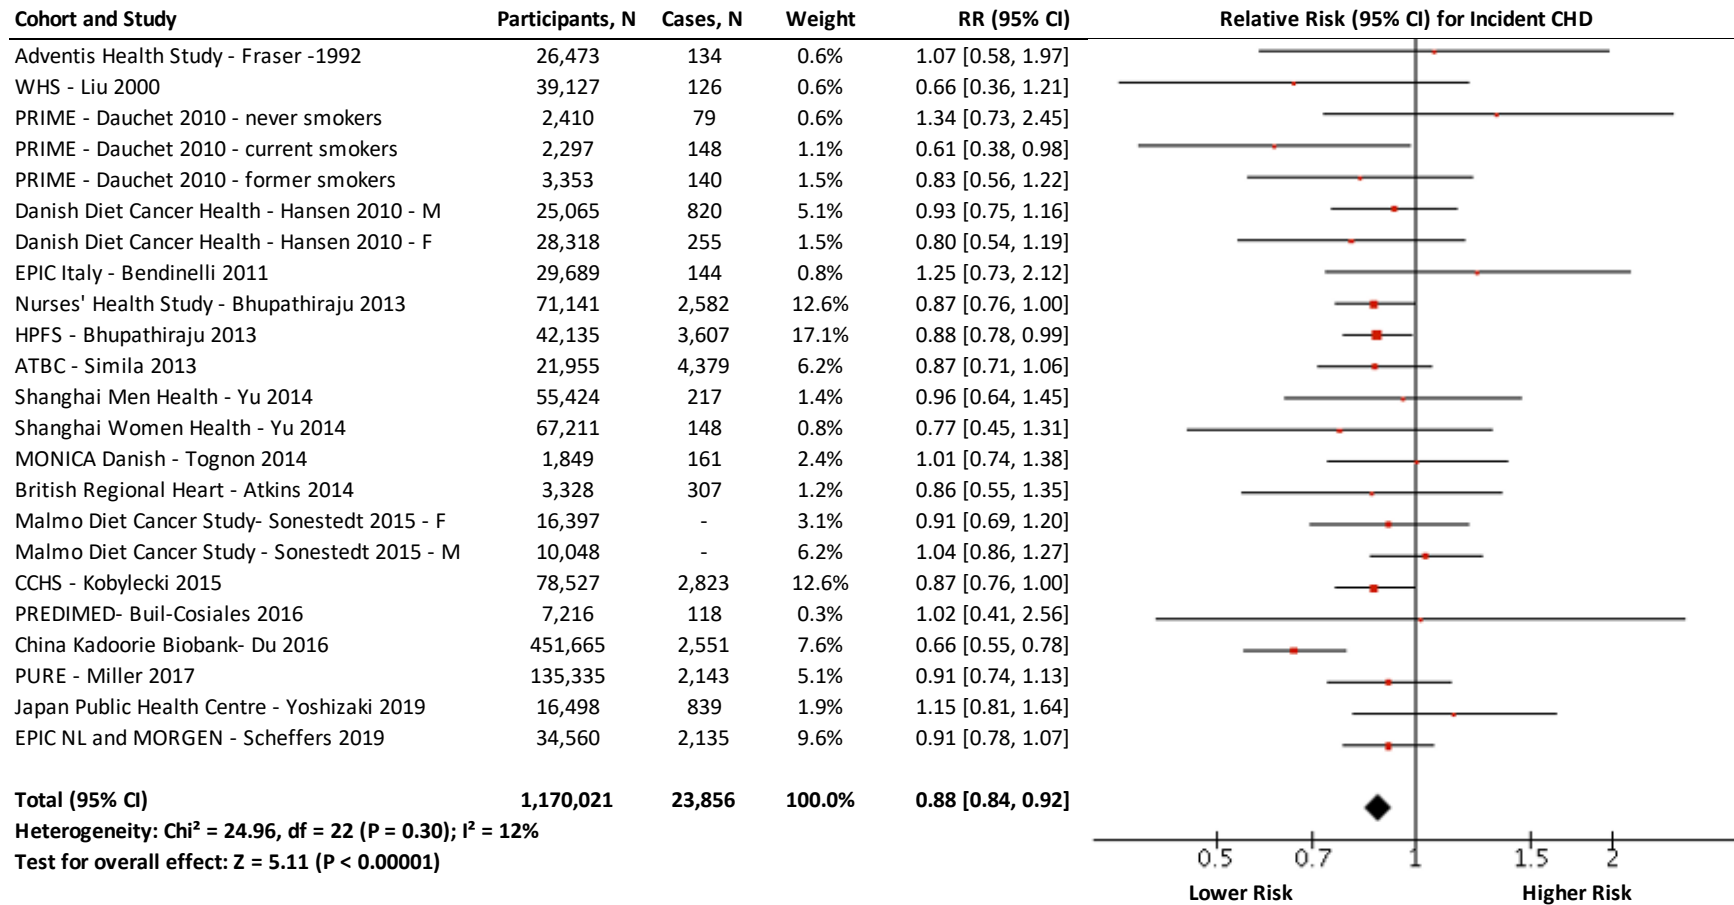

## B. Random Effects

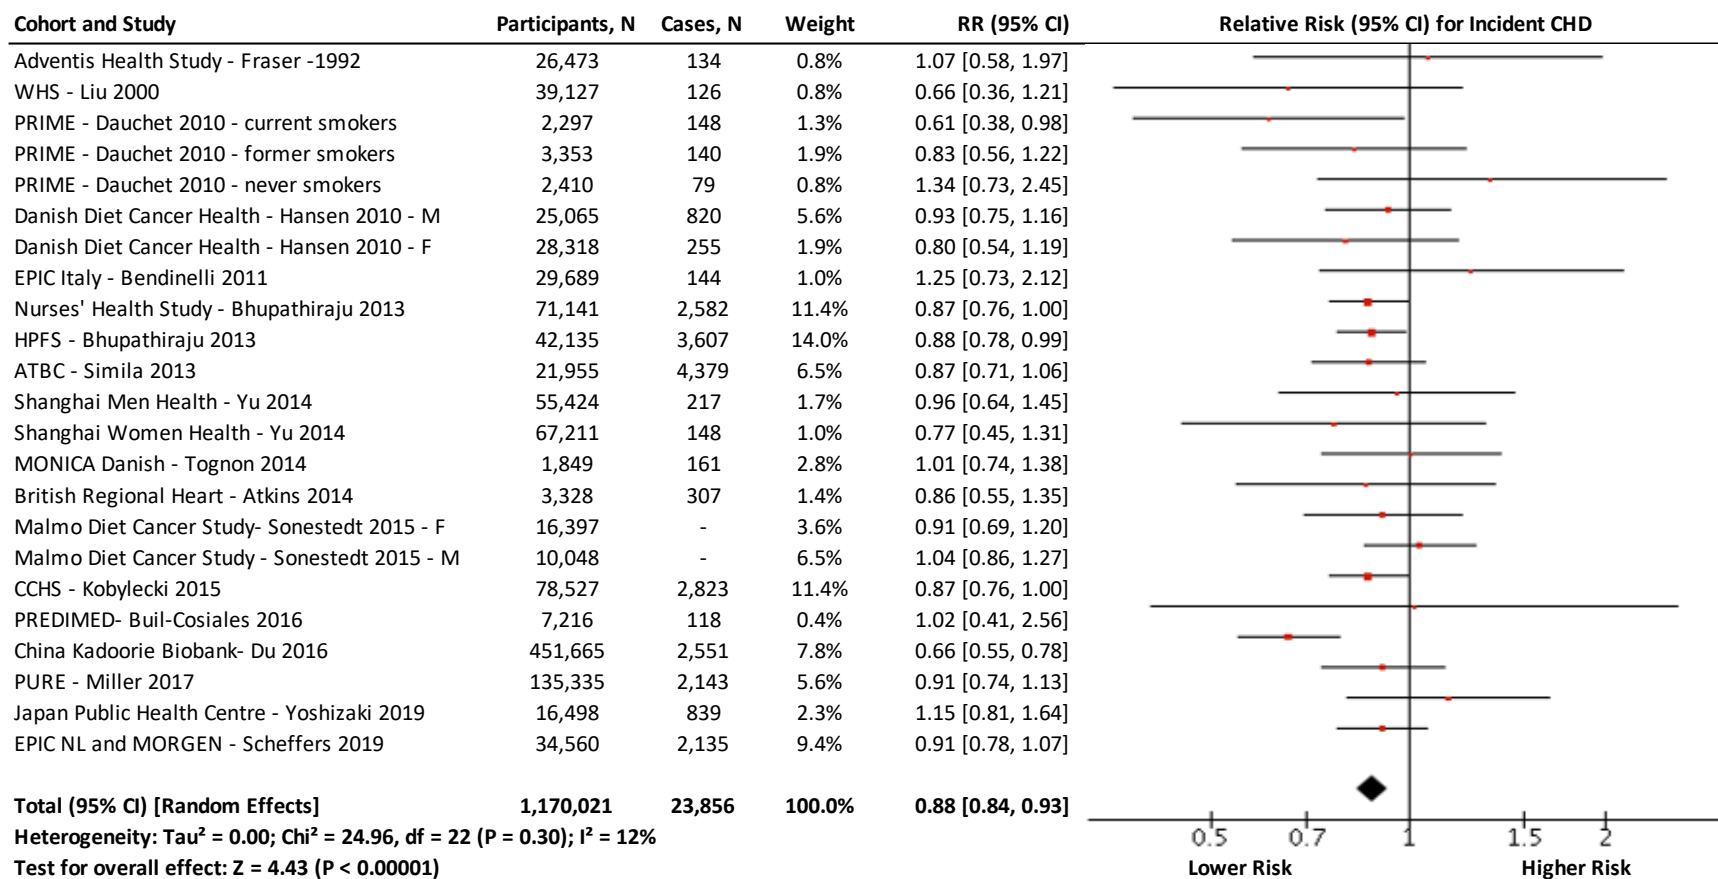

**Figure S57.** Relation between fruit intake and coronary heart disease incidence (highest vs. lowest level of intake). All results are presented as relative risk (RR) with 95% confidence intervals (95% CI). Pooled risk estimate is represented by the black diamond using (A) fixed effects and (B) random effects models. Inter-study heterogeneity was assessed using the Cochran Q statistic ( $\chi^2$ ) at a significance level of  $p < 0.10$ , and quantified by  $I^2$ , with values  $\geq 50\%$  indicating substantial heterogeneity.

## VEGETABLES AND CORONARY HEART DISEASE INCIDENCE

### A. Fixed Effects

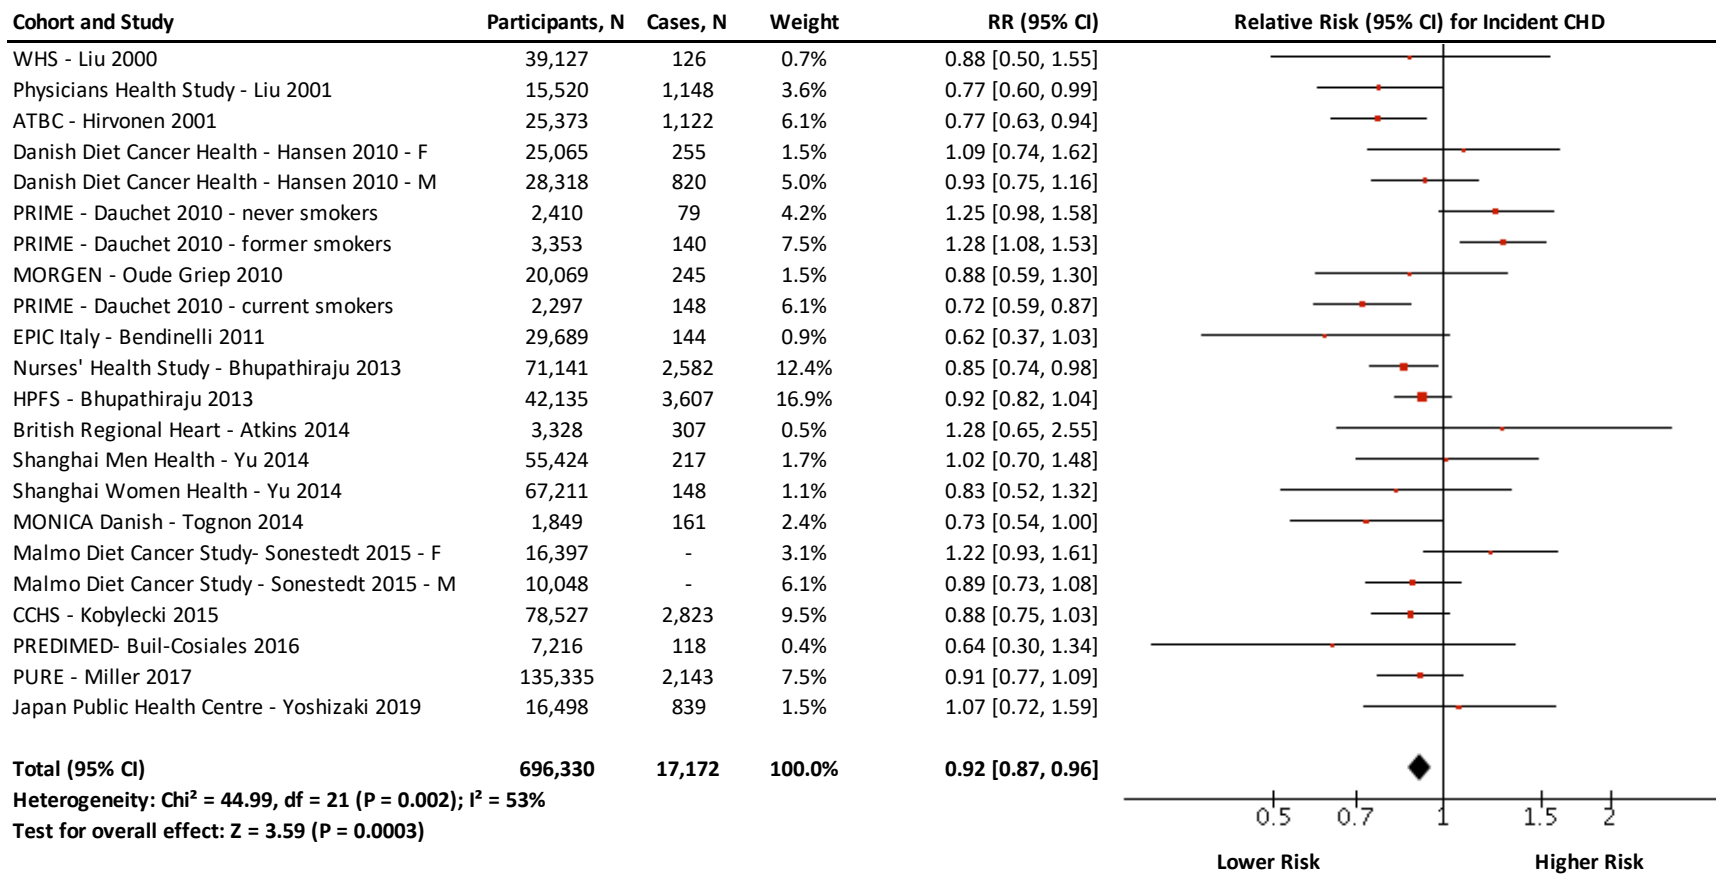

## B. Random Effects

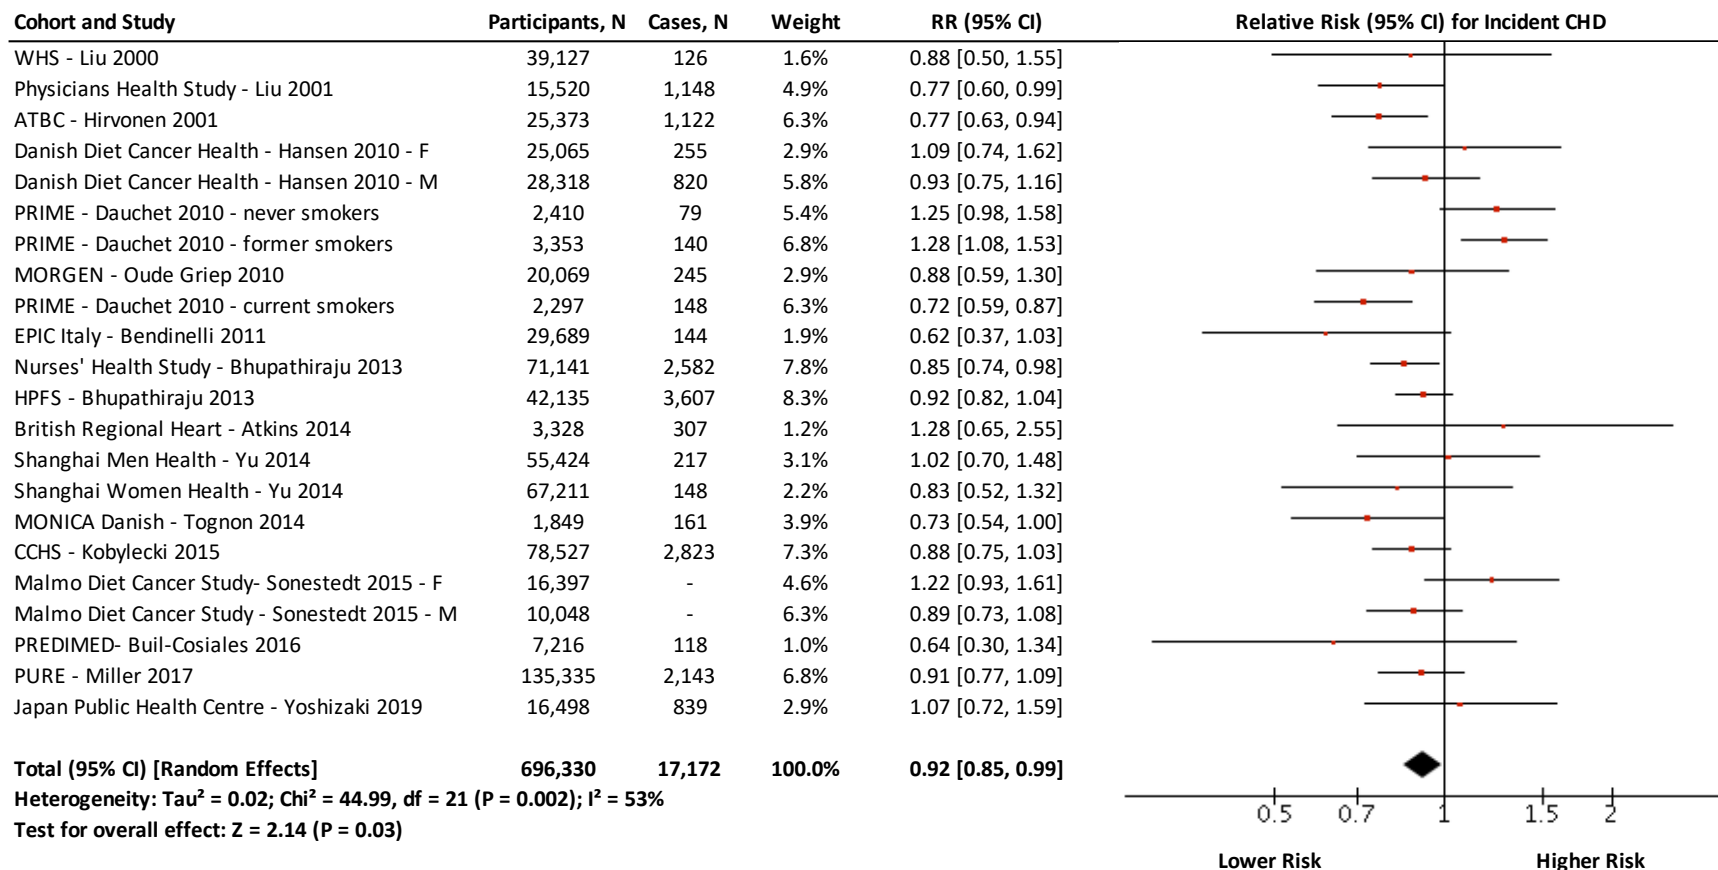

**Figure S58.** Relation between intake of vegetables and coronary heart disease incidence (highest vs. lowest level of intake). All results are presented as relative risk (RR) with 95% confidence intervals (95% CI). Pooled risk estimate is represented by the black diamond using (A) fixed effects and (B) random effects models. Inter-study heterogeneity was assessed using the Cochran Q statistic (Chi<sup>2</sup>) at a significance level of p<0.10, and quantified by I<sup>2</sup>, with values ≥ 50% indicating substantial heterogeneity.



## BANANAS AND CORONARY HEART DISEASE INCIDENCE

### A. Fixed Effects

| Cohort and Study                                                                     | Participants, N | Cases, N   | Weight        | RR (95% CI)              |
|--------------------------------------------------------------------------------------|-----------------|------------|---------------|--------------------------|
| Shanghai Women Health - Yu 2014 - bananas                                            | 67,211          | 148        | 59.0%         | 0.94 [0.59, 1.51]        |
| Shanghai Men Health - Yu 2014 - bananas                                              | 55,424          | 217        | 41.0%         | 0.65 [0.44, 0.96]        |
| <b>Total (95% CI)</b>                                                                | <b>122,635</b>  | <b>365</b> | <b>100.0%</b> | <b>0.76 [0.56, 1.02]</b> |
| <b>Heterogeneity: Chi<sup>2</sup> = 1.40, df = 1 (P = 0.24); I<sup>2</sup> = 29%</b> |                 |            |               |                          |
| <b>Test for overall effect: Z = 1.81 (P = 0.07)</b>                                  |                 |            |               |                          |

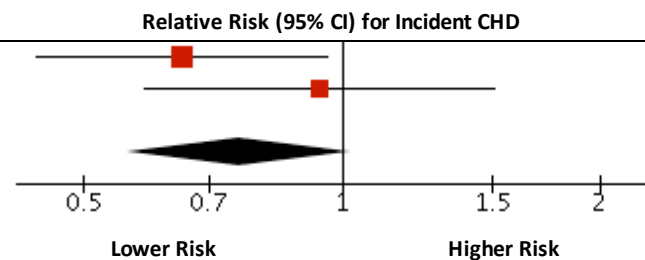

### B. Random Effects

| Cohort and Study                                                                                             | Participants, N | Cases, N   | Weight        | RR (95% CI)              |
|--------------------------------------------------------------------------------------------------------------|-----------------|------------|---------------|--------------------------|
| Shanghai Women Health - Yu 2014 - bananas                                                                    | 67,211          | 148        | 43.6%         | 0.94 [0.59, 1.51]        |
| Shanghai Men Health - Yu 2014 - bananas                                                                      | 55,424          | 217        | 56.4%         | 0.65 [0.44, 0.96]        |
| <b>Total (95% CI) [Random Effects]</b>                                                                       | <b>122,635</b>  | <b>365</b> | <b>100.0%</b> | <b>0.76 [0.53, 1.10]</b> |
| <b>Heterogeneity: Tau<sup>2</sup> = 0.02; Chi<sup>2</sup> = 1.40, df = 1 (P = 0.24); I<sup>2</sup> = 29%</b> |                 |            |               |                          |
| <b>Test for overall effect: Z = 1.47 (P = 0.14)</b>                                                          |                 |            |               |                          |

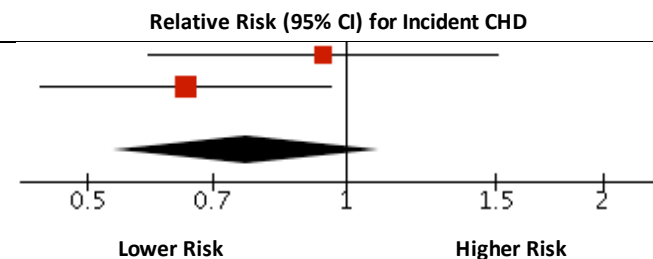

**Figure S59.** Relation between intake of bananas and coronary heart disease incidence (highest vs. lowest level of intake). All results are presented as relative risk (RR) with 95% confidence intervals (95% CI). Pooled risk estimate is represented by the black diamond using (A) fixed effects and (B) random effects models. Inter-study heterogeneity was assessed using the Cochran Q statistic (Chi<sup>2</sup>) at a significance level of p<0.10, and quantified by I<sup>2</sup>, with values ≥ 50% indicating substantial heterogeneity.

## BERRIES AND CORONARY HEART DISEASE INCIDENCE

### A. Fixed Effects

| Cohort and Study             | Participants, N | Cases, N     | Weight        | RR (95% CI)              |
|------------------------------|-----------------|--------------|---------------|--------------------------|
| ATBC - Hirvonen 2001         | 25,373          | 1,122        | 53.9%         | 1.05 [0.86, 1.28]        |
| WHS - Sesso 2007             | 38,176          | 289          | 6.4%          | 1.84 [1.04, 3.25]        |
| MORGEN - Oude Griep 2011 (b) | 20,069          | 233          | 12.2%         | 0.80 [0.53, 1.21]        |
| REGARDS - Goetz 2016 (a)     | 16,678          | 589          | 27.5%         | 0.70 [0.53, 0.92]        |
| <b>Total (95% CI)</b>        | <b>100,296</b>  | <b>2,233</b> | <b>100.0%</b> | <b>0.94 [0.82, 1.09]</b> |

Heterogeneity:  $\text{Chi}^2 = 11.72$ ,  $\text{df} = 3$  ( $P = 0.008$ );  $I^2 = 74\%$   
 Test for overall effect:  $Z = 0.81$  ( $P = 0.42$ )

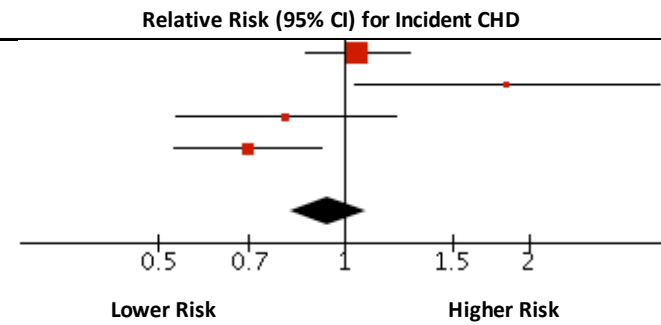

### B. Random Effects

| Cohort and Study                       | Participants, N | Cases, N     | Weight        | RR (95% CI)              |
|----------------------------------------|-----------------|--------------|---------------|--------------------------|
| ATBC - Hirvonen 2001                   | 25,373          | 1,122        | 31.7%         | 1.05 [0.86, 1.28]        |
| WHS - Sesso 2007                       | 38,176          | 289          | 17.1%         | 1.84 [1.04, 3.25]        |
| MORGEN - Oude Griep 2011 (b)           | 20,069          | 233          | 22.7%         | 0.80 [0.53, 1.21]        |
| REGARDS - Goetz 2016 (a)               | 16,678          | 589          | 28.5%         | 0.70 [0.53, 0.92]        |
| <b>Total (95% CI) [Random Effects]</b> | <b>100,296</b>  | <b>2,233</b> | <b>100.0%</b> | <b>0.97 [0.70, 1.34]</b> |

Heterogeneity:  $\text{Tau}^2 = 0.08$ ;  $\text{Chi}^2 = 11.72$ ,  $\text{df} = 3$  ( $P = 0.008$ );  $I^2 = 74\%$   
 Test for overall effect:  $Z = 0.20$  ( $P = 0.84$ )

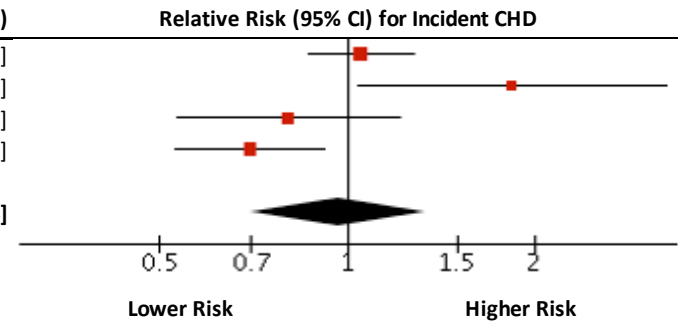

**Figure S60.** Relation between intake of berries and coronary heart disease incidence (highest vs. lowest level of intake). All results are presented as relative risk (RR) with 95% confidence intervals (95% CI). Pooled risk estimate is represented by the black diamond using (A) fixed effects and (B) random effects models. Inter-study heterogeneity was assessed using the Cochran Q statistic ( $\text{Chi}^2$ ) at a significance level of  $p < 0.10$ , and quantified by  $I^2$ , with values  $\geq 50\%$  indicating substantial heterogeneity.

## CITRUS FRUIT AND CORONARY HEART DISEASE INCIDENCE

### A. Fixed Effects

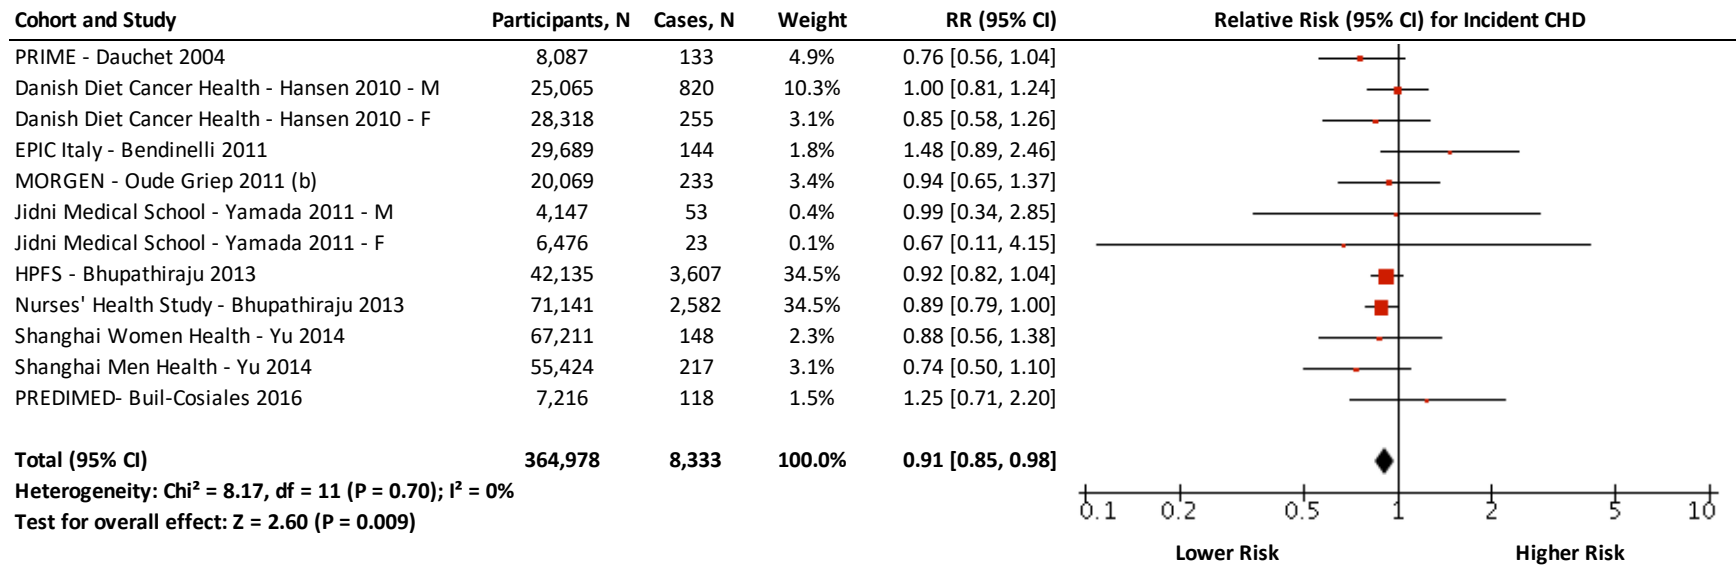

## B. Random Effects

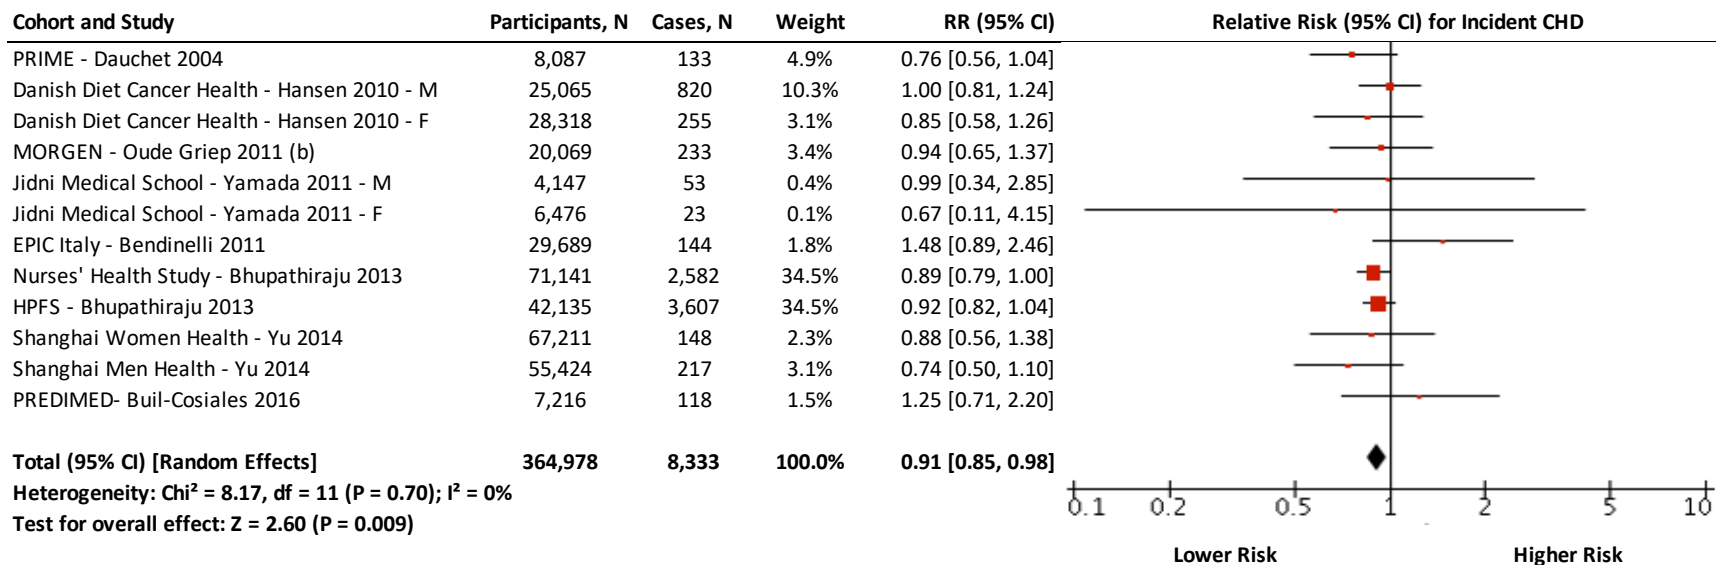

**Figure S61.** Relation between citrus fruit intake and coronary heart disease incidence (highest vs. lowest level of intake). All results are presented as relative risk (RR) with 95% confidence intervals (95% CI). Pooled risk estimate is represented by the black diamond using (A) fixed effects and (B) random effects models. Inter-study heterogeneity was assessed using the Cochran Q statistic ( $\text{Chi}^2$ ) at a significance level of  $p < 0.10$ , and quantified by  $I^2$ , with values  $\geq 50\%$  indicating substantial heterogeneity.

## FRUIT JUICE AND CORONARY HEART DISEASE INCIDENCE

### A. Fixed Effects

| Cohort and Study                            | Participants, N | Cases, N     | Weight        | RR (95% CI)              |
|---------------------------------------------|-----------------|--------------|---------------|--------------------------|
| Danish Diet Cancer Health - Hansen 2010 - F | 28,318          | 255          | 5.3%          | 1.01 [0.72, 1.41]        |
| Danish Diet Cancer Health - Hansen 2010 - M | 25,065          | 820          | 15.2%         | 1.03 [0.85, 1.25]        |
| ATBC - Simila 2013                          | 21,955          | 4,379        | 60.8%         | 1.01 [0.92, 1.11]        |
| EPIC NL and MORGEN - Scheffers 2019         | 34,560          | 2,135        | 18.8%         | 0.89 [0.74, 1.06]        |
| <b>Total (95% CI)</b>                       | <b>109,898</b>  | <b>7,589</b> | <b>100.0%</b> | <b>0.99 [0.92, 1.07]</b> |

Heterogeneity:  $\chi^2 = 1.83$ ,  $df = 3$  ( $P = 0.61$ );  $I^2 = 0\%$   
 Test for overall effect:  $Z = 0.29$  ( $P = 0.77$ )

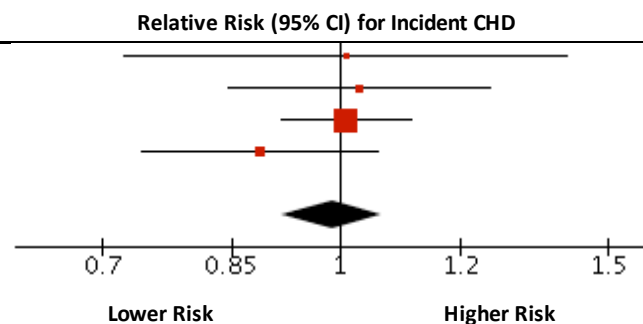

### B. Random Effects

| Cohort and Study                            | Participants, N | Cases, N     | Weight        | RR (95% CI)              |
|---------------------------------------------|-----------------|--------------|---------------|--------------------------|
| Danish Diet Cancer Health - Hansen 2010 - F | 28,318          | 255          | 5.3%          | 1.01 [0.72, 1.41]        |
| Danish Diet Cancer Health - Hansen 2010 - M | 25,065          | 820          | 15.2%         | 1.03 [0.85, 1.25]        |
| ATBC - Simila 2013                          | 21,955          | 4,379        | 60.8%         | 1.01 [0.92, 1.11]        |
| EPIC NL and MORGEN - Scheffers 2019         | 34,560          | 2,135        | 18.8%         | 0.89 [0.74, 1.06]        |
| <b>Total (95% CI) [Random Effects]</b>      | <b>109,898</b>  | <b>7,589</b> | <b>100.0%</b> | <b>0.99 [0.92, 1.07]</b> |

Heterogeneity:  $\tau^2 = 0.00$ ;  $\chi^2 = 1.83$ ,  $df = 3$  ( $P = 0.61$ );  $I^2 = 0\%$   
 Test for overall effect:  $Z = 0.29$  ( $P = 0.77$ )

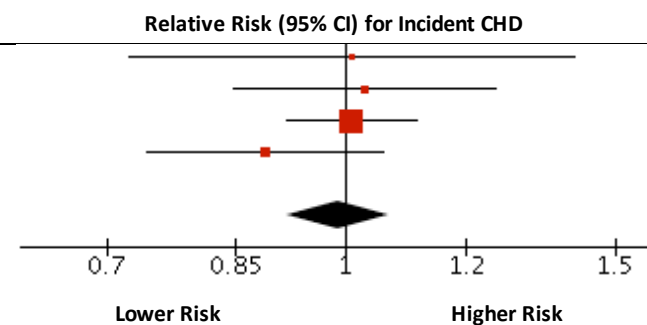

**Figure S62.** Relation between intake of fruit juice and coronary heart disease incidence (highest vs. lowest level of intake). All results are presented as relative risk (RR) with 95% confidence intervals (95% CI). Pooled risk estimate is represented by the black diamond using (A) fixed effects and (B) random effects models. Inter-study heterogeneity was assessed using the Cochran Q statistic ( $\chi^2$ ) at a significance level of  $p < 0.10$ , and quantified by  $I^2$ , with values  $\geq 50\%$  indicating substantial heterogeneity.

## GRAPES AND CORONARY HEART DISEASE INCIDENCE

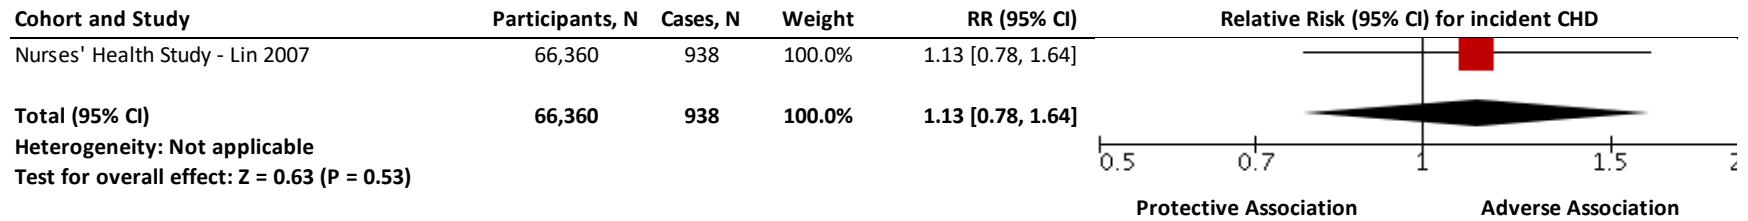

**Figure S63.** Relation between intake of grapes and coronary heart disease incidence (highest vs. lowest level of intake). All results are presented as relative risk (RR) with 95% confidence intervals (95% CI). Pooled risk estimate is represented by the black diamond. Inter-study heterogeneity was assessed using the Cochran Q statistic ( $\text{Chi}^2$ ) at a significance level of  $p < 0.10$ , and quantified by  $I^2$ , with values  $\geq 50\%$  indicating substantial heterogeneity.

## POMMES AND CORONARY HEART DISEASE INCIDENCE

### A. Fixed Effects

| Cohort and Study                           | Participants, N | Cases, N     | Weight        | RR (95% CI)              |
|--------------------------------------------|-----------------|--------------|---------------|--------------------------|
| Nurses' Health Study - Lin 2007            | 66,360          | 938          | 3.7%          | 1.08 [0.75, 1.57]        |
| MORGEN - Oude Griep 2011 (b)               | 20,069          | 245          | 3.7%          | 1.25 [0.86, 1.81]        |
| Shanghai Women Health - Yu 2014            | 67,211          | 148          | 2.3%          | 0.92 [0.58, 1.48]        |
| Shanghai Men Health - Yu 2014              | 55,424          | 217          | 3.0%          | 0.75 [0.50, 1.13]        |
| PREDIMED- Buil-Cosiales 2016               | 7,216           | 118          | 1.4%          | 0.83 [0.45, 1.52]        |
| REGARDS - Goetz 2016 (a)                   | 16,678          | 589          | 5.9%          | 0.74 [0.55, 0.99]        |
| Danish Diet Cancer Health - Gunge 2017 - F | 28,809          | 653          | 20.8%         | 1.02 [0.87, 1.19]        |
| Danish Diet Cancer Health - Gunge 2017 - M | 25,759          | 1,669        | 53.3%         | 0.88 [0.80, 0.97]        |
| NutriNet-Sante - Adriouch 2018             | 84,158          | 309          | 5.9%          | 0.75 [0.56, 1.00]        |
| <b>Total (95% CI)</b>                      | <b>371,684</b>  | <b>4,886</b> | <b>100.0%</b> | <b>0.90 [0.84, 0.97]</b> |

Heterogeneity:  $\text{Chi}^2 = 10.63$ ,  $\text{df} = 8$  ( $P = 0.22$ );  $I^2 = 25\%$   
 Test for overall effect:  $Z = 2.80$  ( $P = 0.005$ )

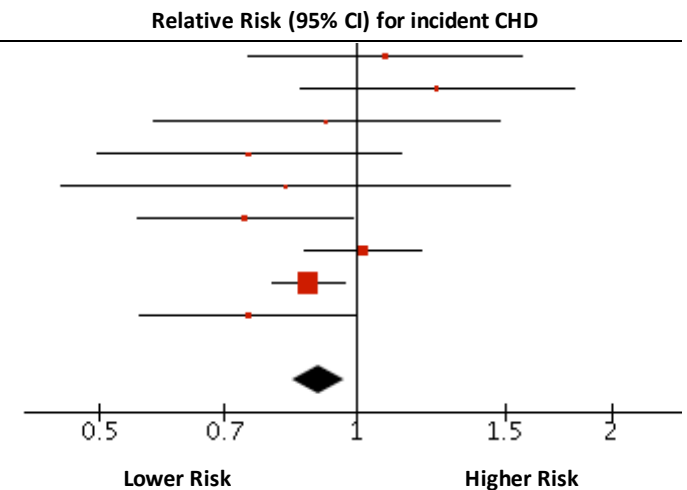

### B. Random Effects

| Cohort and Study                           | Participants, N | Cases, N     | Weight        | RR (95% CI)              |
|--------------------------------------------|-----------------|--------------|---------------|--------------------------|
| Nurses' Health Study - Lin 2007            | 66,360          | 938          | 6.4%          | 1.08 [0.75, 1.57]        |
| MORGEN - Oude Griep 2011 (b)               | 20,069          | 245          | 6.4%          | 1.25 [0.86, 1.81]        |
| Shanghai Women Health - Yu 2014            | 67,211          | 148          | 4.2%          | 0.92 [0.58, 1.48]        |
| Shanghai Men Health - Yu 2014              | 55,424          | 217          | 5.3%          | 0.75 [0.50, 1.13]        |
| PREDIMED- Buil-Cosiales 2016               | 7,216           | 118          | 2.6%          | 0.83 [0.45, 1.52]        |
| REGARDS - Goetz 2016 (a)                   | 16,678          | 589          | 9.5%          | 0.74 [0.55, 0.99]        |
| Danish Diet Cancer Health - Gunge 2017 - F | 28,809          | 653          | 22.5%         | 1.02 [0.87, 1.19]        |
| Danish Diet Cancer Health - Gunge 2017 - M | 25,759          | 1,669        | 33.7%         | 0.88 [0.80, 0.97]        |
| NutriNet-Sante - Adriouch 2018             | 84,158          | 309          | 9.5%          | 0.75 [0.56, 1.00]        |
| <b>Total (95% CI) [Random Effects]</b>     | <b>371,684</b>  | <b>4,886</b> | <b>100.0%</b> | <b>0.90 [0.82, 1.00]</b> |

Heterogeneity:  $\text{Tau}^2 = 0.01$ ;  $\text{Chi}^2 = 10.63$ ,  $\text{df} = 8$  ( $P = 0.22$ );  $I^2 = 25\%$   
 Test for overall effect:  $Z = 1.95$  ( $P = 0.05$ )

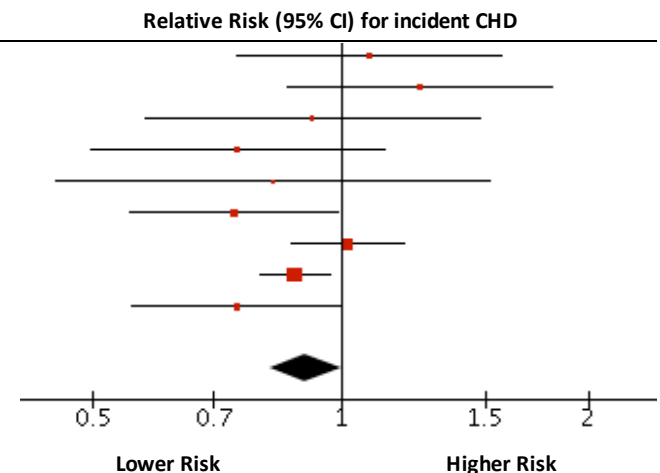

**Figure S64.** Relation between intake of pomes fruit and coronary heart disease incidence (highest vs. lowest level of intake). All results are presented as relative risk (RR) with 95% confidence intervals (95% CI). Pooled risk estimate is represented by the black diamond using (A) fixed effects and (B) random effects models. Inter-study heterogeneity was assessed using the Cochran Q statistic ( $\text{Chi}^2$ ) at a significance level of  $p < 0.10$ , and quantified by  $I^2$ , with values  $\geq 50\%$  indicating substantial heterogeneity.

## WATERMELON AND CORONARY HEART DISEASE INCIDENCE

### A. Fixed Effects

| Cohort and Study                                                                    | Participants, N | Cases, N   | Weight        | RR (95% CI)              |
|-------------------------------------------------------------------------------------|-----------------|------------|---------------|--------------------------|
| Shanghai Men Health - Yu 2014 - Watermelon                                          | 55,424          | 217        | 66.9%         | 0.96 [0.66, 1.39]        |
| Shanghai Women Health - Yu 2014 - Watermelon                                        | 67,211          | 148        | 33.1%         | 0.71 [0.42, 1.21]        |
| <b>Total (95% CI)</b>                                                               | <b>122,635</b>  | <b>365</b> | <b>100.0%</b> | <b>0.87 [0.64, 1.18]</b> |
| <b>Heterogeneity: Chi<sup>2</sup> = 0.83, df = 1 (P = 0.36); I<sup>2</sup> = 0%</b> |                 |            |               |                          |
| <b>Test for overall effect: Z = 0.90 (P = 0.37)</b>                                 |                 |            |               |                          |

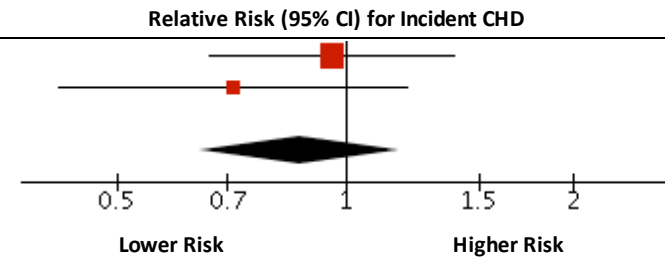

### B. Random Effects

| Cohort and Study                                                                                            | Participants, N | Cases, N   | Weight        | RR (95% CI)              |
|-------------------------------------------------------------------------------------------------------------|-----------------|------------|---------------|--------------------------|
| Shanghai Men Health - Yu 2014 - Watermelon                                                                  | 55,424          | 217        | 66.9%         | 0.96 [0.66, 1.39]        |
| Shanghai Women Health - Yu 2014 - Watermelon                                                                | 67,211          | 148        | 33.1%         | 0.71 [0.42, 1.21]        |
| <b>Total (95% CI) [Random Effects]</b>                                                                      | <b>122,635</b>  | <b>365</b> | <b>100.0%</b> | <b>0.87 [0.64, 1.18]</b> |
| <b>Heterogeneity: Tau<sup>2</sup> = 0.00; Chi<sup>2</sup> = 0.83, df = 1 (P = 0.36); I<sup>2</sup> = 0%</b> |                 |            |               |                          |
| <b>Test for overall effect: Z = 0.90 (P = 0.37)</b>                                                         |                 |            |               |                          |

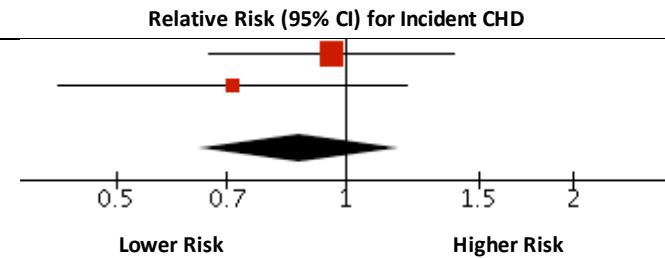

**Figure S65.** Relation between watermelon intake and coronary heart disease incidence (highest vs. lowest level of intake). All results are presented as relative risk (RR) with 95% confidence intervals (95% CI). Pooled risk estimate is represented by the black diamond using (A) fixed effects and (B) random effects models. Inter-study heterogeneity was assessed using the Cochran Q statistic (Chi<sup>2</sup>) at a significance level of p<0.10, and quantified by I<sup>2</sup>, with values ≥ 50% indicating substantial heterogeneity.



## ALLIUM VEGETABLES AND CORONARY HEART DISEASE INCIDENCE

### A. Fixed Effects

| Cohort and Study                                                                     | Participants, N | Cases, N     | Weight        | RR (95% CI)              |
|--------------------------------------------------------------------------------------|-----------------|--------------|---------------|--------------------------|
| Caerphilly Prospective Study - Hertog 1997                                           | 1,900           | 186          | 9.8%          | 0.60 [0.36, 1.00]        |
| Nurses' Health Study - Lin 2007                                                      | 66,360          | 938          | 33.7%         | 0.98 [0.74, 1.29]        |
| MORGEN - Oude Griep 2011 (b)                                                         | 20,069          | 245          | 25.8%         | 0.94 [0.69, 1.29]        |
| Shanghai Men Health - Yu 2014                                                        | 55,424          | 217          | 18.3%         | 0.86 [0.59, 1.25]        |
| Shanghai Women Health - Yu 2014                                                      | 67,211          | 148          | 12.5%         | 1.27 [0.81, 2.00]        |
| <b>Total (95% CI)</b>                                                                | <b>210,964</b>  | <b>1,734</b> | <b>100.0%</b> | <b>0.93 [0.80, 1.09]</b> |
| <b>Heterogeneity: Chi<sup>2</sup> = 4.99, df = 4 (P = 0.29); I<sup>2</sup> = 20%</b> |                 |              |               |                          |
| <b>Test for overall effect: Z = 0.86 (P = 0.39)</b>                                  |                 |              |               |                          |

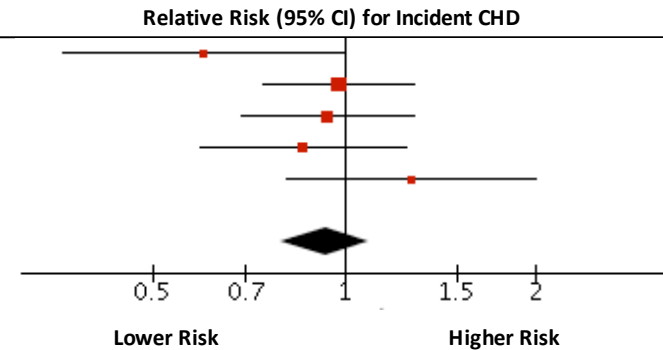

### B. Random Effects

| Cohort and Study                                                                                             | Participants, N | Cases, N     | Weight        | RR (95% CI)              |
|--------------------------------------------------------------------------------------------------------------|-----------------|--------------|---------------|--------------------------|
| Caerphilly Prospective Study - Hertog 1997                                                                   | 1,900           | 186          | 11.3%         | 0.60 [0.36, 1.00]        |
| Nurses' Health Study - Lin 2007                                                                              | 66,360          | 938          | 30.5%         | 0.98 [0.74, 1.29]        |
| MORGEN - Oude Griep 2011 (b)                                                                                 | 20,069          | 245          | 25.1%         | 0.94 [0.69, 1.29]        |
| Shanghai Women Health - Yu 2014                                                                              | 67,211          | 148          | 14.0%         | 1.27 [0.81, 2.00]        |
| Shanghai Men Health - Yu 2014                                                                                | 55,424          | 217          | 19.2%         | 0.86 [0.59, 1.25]        |
| <b>Total (95% CI) [Random Effects]</b>                                                                       | <b>210,964</b>  | <b>1,734</b> | <b>100.0%</b> | <b>0.93 [0.77, 1.11]</b> |
| <b>Heterogeneity: Tau<sup>2</sup> = 0.01; Chi<sup>2</sup> = 4.99, df = 4 (P = 0.29); I<sup>2</sup> = 20%</b> |                 |              |               |                          |
| <b>Test for overall effect: Z = 0.80 (P = 0.42)</b>                                                          |                 |              |               |                          |

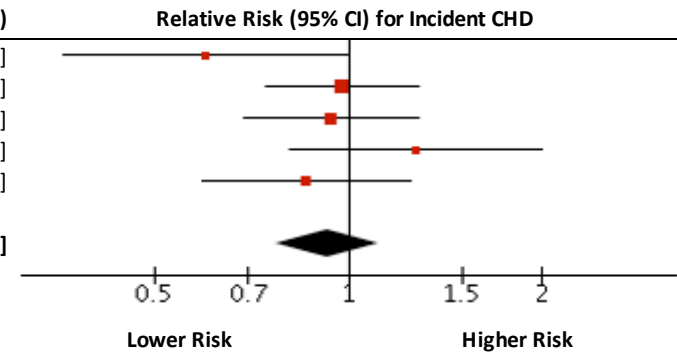

**Figure S66.** Relation between intake of allium vegetables and coronary heart disease incidence (highest vs. lowest level of intake). All results are presented as relative risk (RR) with 95% confidence intervals (95% CI). Pooled risk estimate is represented by the black diamond using (A) fixed effects and (B) random effects models. Inter-study heterogeneity was assessed using the Cochran Q statistic (Chi<sup>2</sup>) at a significance level of p<0.10, and quantified by I<sup>2</sup>, with values ≥ 50% indicating substantial heterogeneity.

## CRUCIFEROUS VEGETABLES AND CORONARY HEART DISEASE INCIDENCE

### A. Fixed Effects

| Cohort and Study                             | Participants, N | Cases, N     | Weight        | RR (95% CI)              |
|----------------------------------------------|-----------------|--------------|---------------|--------------------------|
| EPIC Italy - Bendinelli 2011                 | 29,689          | 144          | 1.4%          | 0.88 [0.53, 1.46]        |
| MORGEN - Oude Griep 2011(b)-green cabbage ve | 20,069          | 245          | 3.7%          | 1.26 [0.92, 1.72]        |
| HPFS - Bhupathiraju 2013                     | 42,135          | 3,607        | 26.3%         | 0.96 [0.85, 1.08]        |
| Nurses' Health Study - Bhupathiraju 2013     | 71,141          | 2,582        | 26.3%         | 1.03 [0.92, 1.16]        |
| Shanghai Women Health - Yu 2014              | 67,211          | 148          | 1.8%          | 0.80 [0.51, 1.26]        |
| Shanghai Men Health - Yu 2014                | 55,424          | 217          | 2.4%          | 1.13 [0.76, 1.67]        |
| PREDIMED- Buil-Cosiales 2016                 | 7,216           | 118          | 0.2%          | 0.32 [0.09, 1.17]        |
| Danish Diet Cancer Health - Gunge 2017 - M   | 25,759          | 1,669        | 26.3%         | 1.02 [0.91, 1.15]        |
| Danish Diet Cancer Health - Gunge 2017 - F   | 28,809          | 653          | 11.7%         | 1.05 [0.88, 1.25]        |
| <b>Total (95% CI)</b>                        | <b>347,453</b>  | <b>9,383</b> | <b>100.0%</b> | <b>1.01 [0.95, 1.07]</b> |

Heterogeneity:  $\text{Chi}^2 = 7.55$ ,  $\text{df} = 8$  ( $P = 0.48$ );  $I^2 = 0\%$   
 Test for overall effect:  $Z = 0.38$  ( $P = 0.71$ )

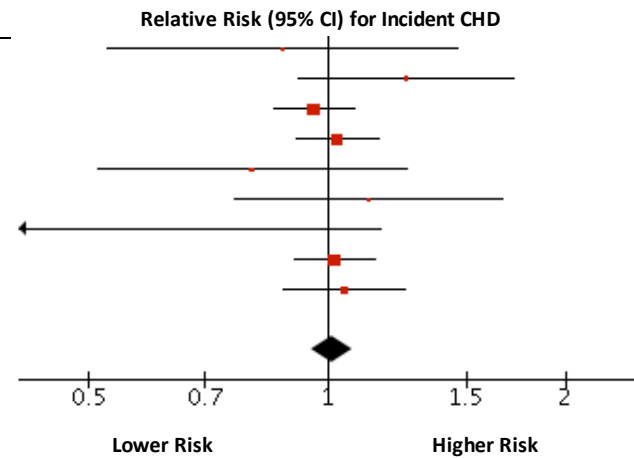

### B. Random Effects

| Cohort and Study                             | Participants, N | Cases, N     | Weight        | RR (95% CI)              |
|----------------------------------------------|-----------------|--------------|---------------|--------------------------|
| MORGEN - Oude Griep 2011(b)-green cabbage ve | 20,069          | 245          | 3.7%          | 1.26 [0.92, 1.72]        |
| EPIC Italy - Bendinelli 2011                 | 29,689          | 144          | 1.4%          | 0.88 [0.53, 1.46]        |
| Nurses' Health Study - Bhupathiraju 2013     | 71,141          | 2,582        | 26.3%         | 1.03 [0.92, 1.16]        |
| HPFS - Bhupathiraju 2013                     | 42,135          | 3,607        | 26.3%         | 0.96 [0.85, 1.08]        |
| Shanghai Men Health - Yu 2014                | 55,424          | 217          | 2.4%          | 1.13 [0.76, 1.67]        |
| Shanghai Women Health - Yu 2014              | 67,211          | 148          | 1.8%          | 0.80 [0.51, 1.26]        |
| PREDIMED- Buil-Cosiales 2016                 | 7,216           | 118          | 0.2%          | 0.32 [0.09, 1.17]        |
| Danish Diet Cancer Health - Gunge 2017 - F   | 28,809          | 653          | 11.7%         | 1.05 [0.88, 1.25]        |
| Danish Diet Cancer Health - Gunge 2017 - M   | 25,759          | 1,669        | 26.3%         | 1.02 [0.91, 1.15]        |
| <b>Total (95% CI) [Random Effects]</b>       | <b>347,453</b>  | <b>9,383</b> | <b>100.0%</b> | <b>1.01 [0.95, 1.07]</b> |

Heterogeneity:  $\text{Tau}^2 = 0.00$ ;  $\text{Chi}^2 = 7.55$ ,  $\text{df} = 8$  ( $P = 0.48$ );  $I^2 = 0\%$   
 Test for overall effect:  $Z = 0.38$  ( $P = 0.71$ )

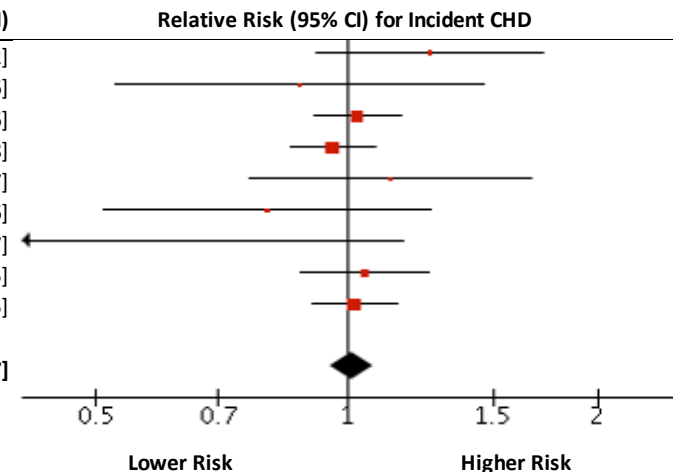

**Figure S67.** Relation between intake of cruciferous vegetables and coronary heart disease incidence (highest vs. lowest level of intake). All results are presented as relative risk (RR) with 95% confidence intervals (95% CI). Pooled risk estimate is represented by the black diamond using (A) fixed effects and (B) random effects models. Inter-study heterogeneity was assessed using the Cochran Q statistic ( $\text{Chi}^2$ ) at a significance level of  $p < 0.10$ , and quantified by  $I^2$ , with values  $\geq 50\%$  indicating substantial heterogeneity.



## TOMATOES AND CORONARY HEART DISEASE INCIDENCE

### A. Fixed Effects

| Cohort and Study                                                                    | Participants, N | Cases, N     | Weight        | RR (95% CI)              |
|-------------------------------------------------------------------------------------|-----------------|--------------|---------------|--------------------------|
| WHS - Sesso 2003 (a)                                                                | 38,445          | 201          | 8.3%          | 0.39 [0.12, 1.29]        |
| Nurses' Health Study - Lin 2007                                                     | 66,360          | 938          | 49.4%         | 0.90 [0.55, 1.46]        |
| EPIC Italy - Bendinelli 2011                                                        | 29,689          | 144          | 42.3%         | 0.80 [0.47, 1.36]        |
| <b>Total (95% CI)</b>                                                               | <b>134,494</b>  | <b>1,283</b> | <b>100.0%</b> | <b>0.80 [0.57, 1.13]</b> |
| <b>Heterogeneity: Chi<sup>2</sup> = 1.59, df = 2 (P = 0.45); I<sup>2</sup> = 0%</b> |                 |              |               |                          |
| <b>Test for overall effect: Z = 1.28 (P = 0.20)</b>                                 |                 |              |               |                          |

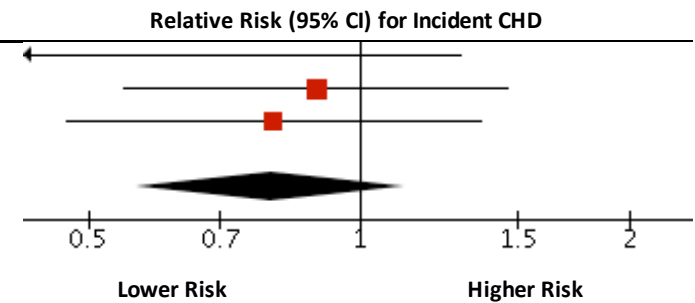

### B. Random Effects

| Cohort and Study                                                                                            | Participants, N | Cases, N     | Weight        | RR (95% CI)              |
|-------------------------------------------------------------------------------------------------------------|-----------------|--------------|---------------|--------------------------|
| WHS - Sesso 2003 (a)                                                                                        | 38,445          | 201          | 8.3%          | 0.39 [0.12, 1.29]        |
| Nurses' Health Study - Lin 2007                                                                             | 66,360          | 938          | 49.4%         | 0.90 [0.55, 1.46]        |
| EPIC Italy - Bendinelli 2011                                                                                | 29,689          | 144          | 42.3%         | 0.80 [0.47, 1.36]        |
| <b>Total (95% CI) [Random Effects]</b>                                                                      | <b>134,494</b>  | <b>1,283</b> | <b>100.0%</b> | <b>0.80 [0.57, 1.13]</b> |
| <b>Heterogeneity: Tau<sup>2</sup> = 0.00; Chi<sup>2</sup> = 1.59, df = 2 (P = 0.45); I<sup>2</sup> = 0%</b> |                 |              |               |                          |
| <b>Test for overall effect: Z = 1.28 (P = 0.20)</b>                                                         |                 |              |               |                          |

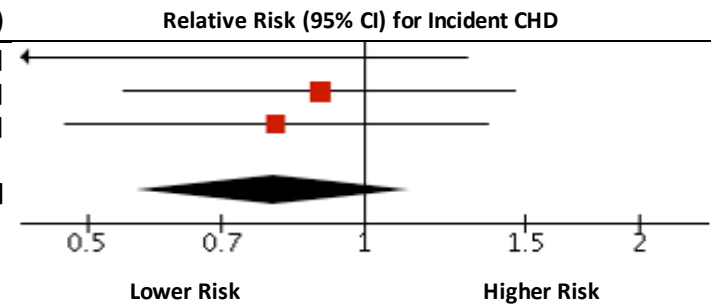

**Figure S69.** Relation between intake of tomatoes and coronary heart disease incidence (highest vs. lowest level of intake). All results are presented as relative risk (RR) with 95% confidence intervals (95% CI). Pooled risk estimate is represented by the black diamond using (A) fixed effects and (B) random effects models. Inter-study heterogeneity was assessed using the Cochran Q statistic (Chi<sup>2</sup>) at a significance level of p<0.10, and quantified by I<sup>2</sup>, with values ≥ 50% indicating substantial heterogeneity.

## A. Fixed Effects

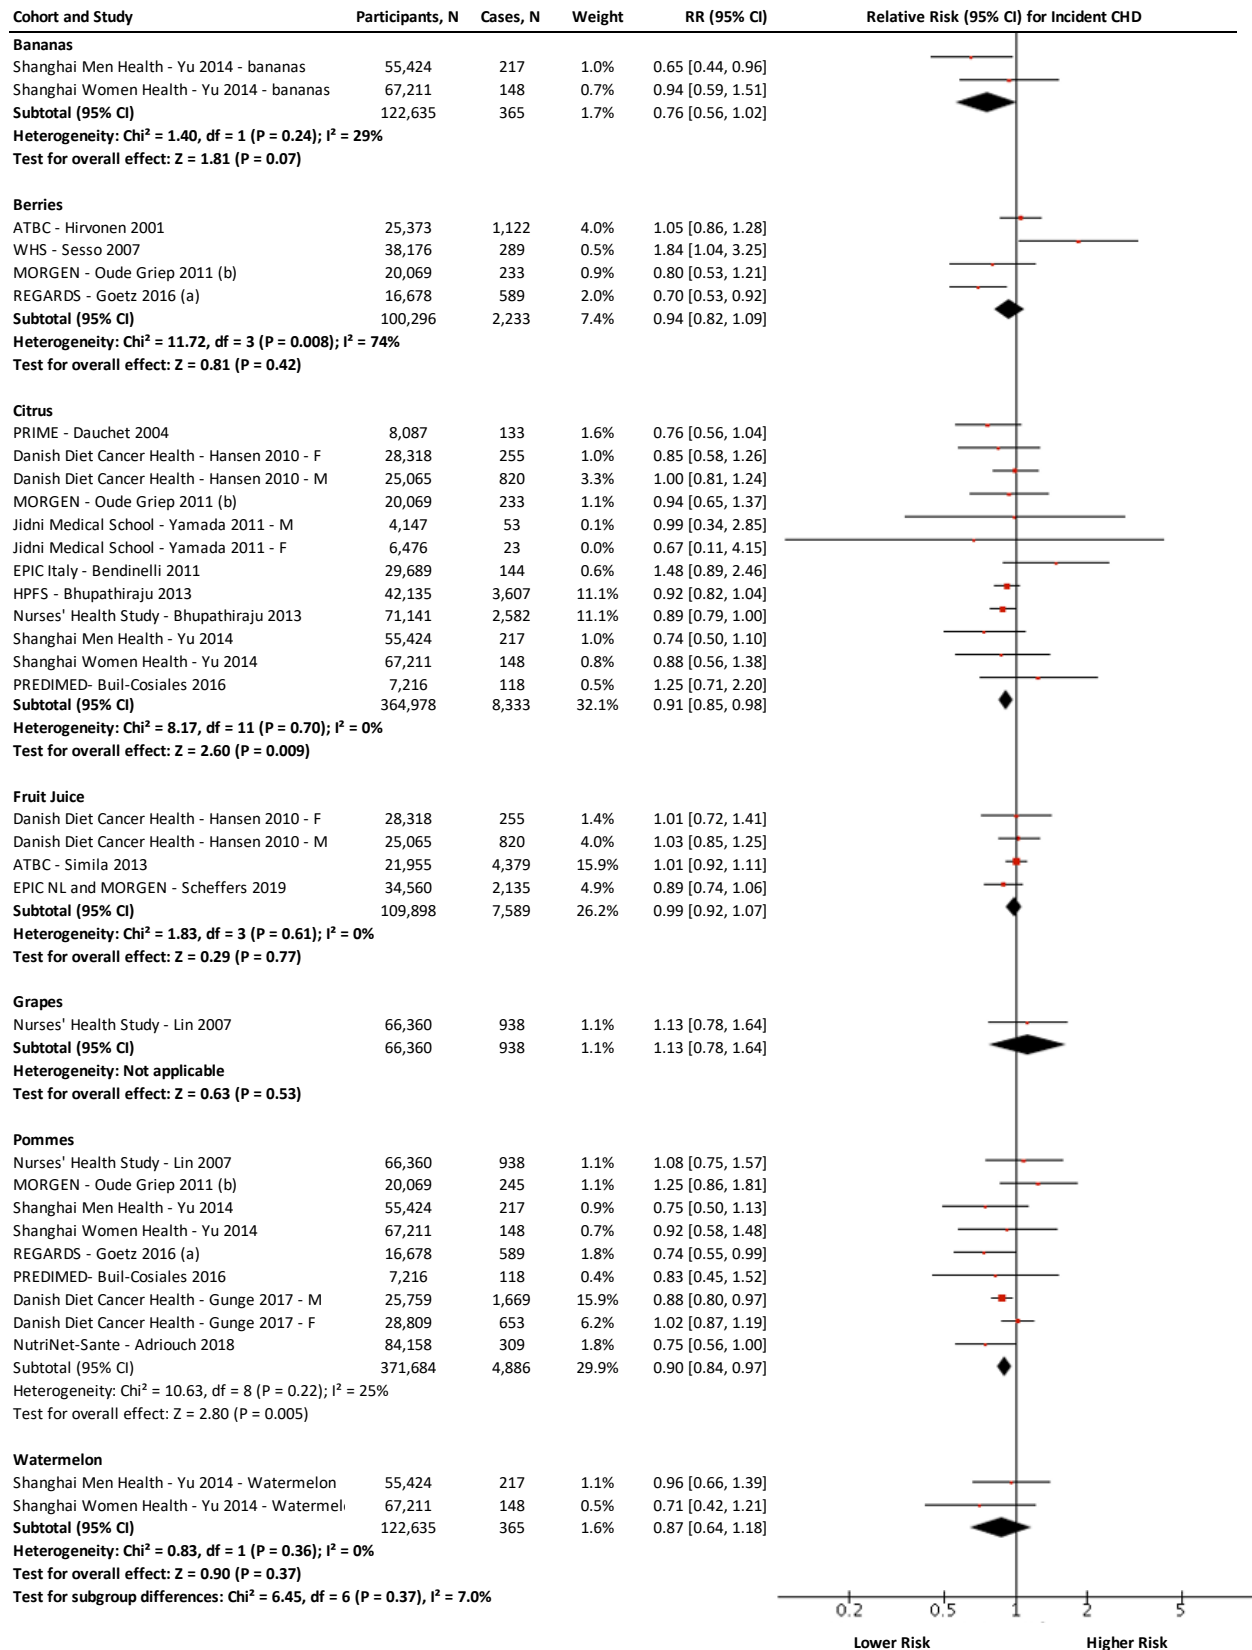

## B. Random Effects

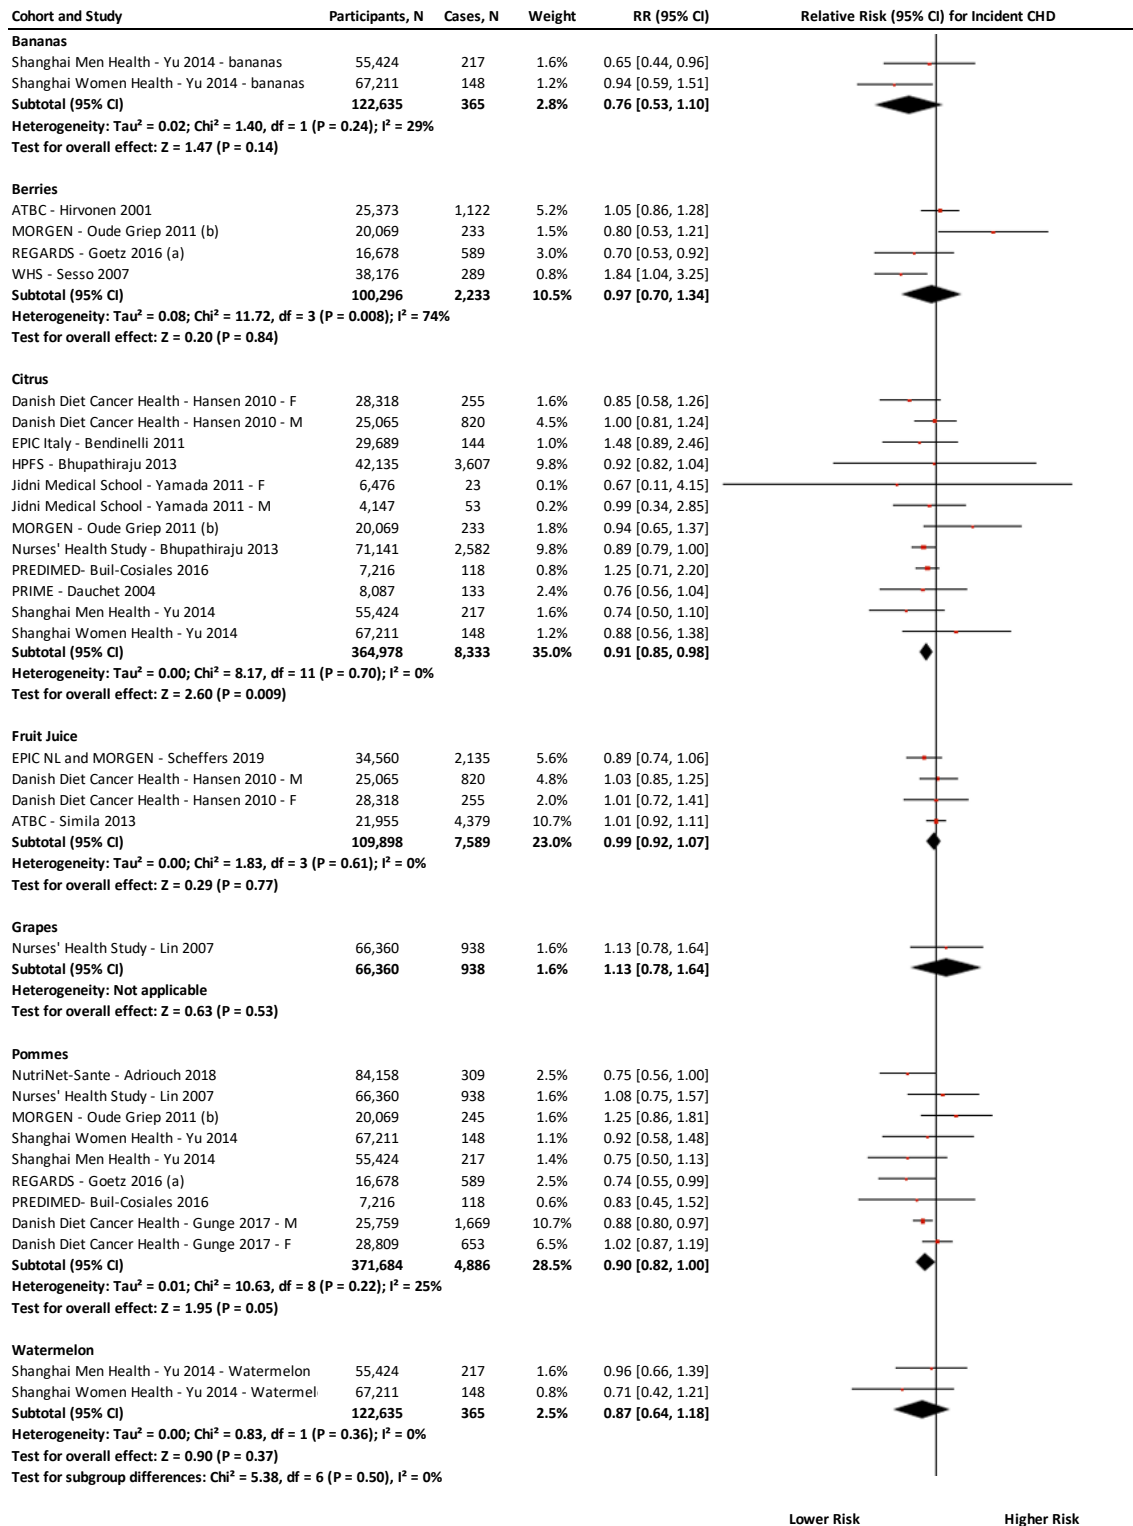

**Figure S70.** Relation between sources of fruit and CHD incidence (highest vs. lowest level of intake). All results are presented as relative risk (RR) with 95% confidence intervals (95% CI). Pooled risk estimate is represented by the black diamond using (A) fixed effects and (B) random effects models. Inter-study heterogeneity was assessed using the Cochran Q statistic ( $\chi^2$ ) at a significance level of  $p < 0.10$ , and quantified by  $I^2$ , with values  $\geq 50\%$  indicating substantial heterogeneity

## A. Fixed Effects

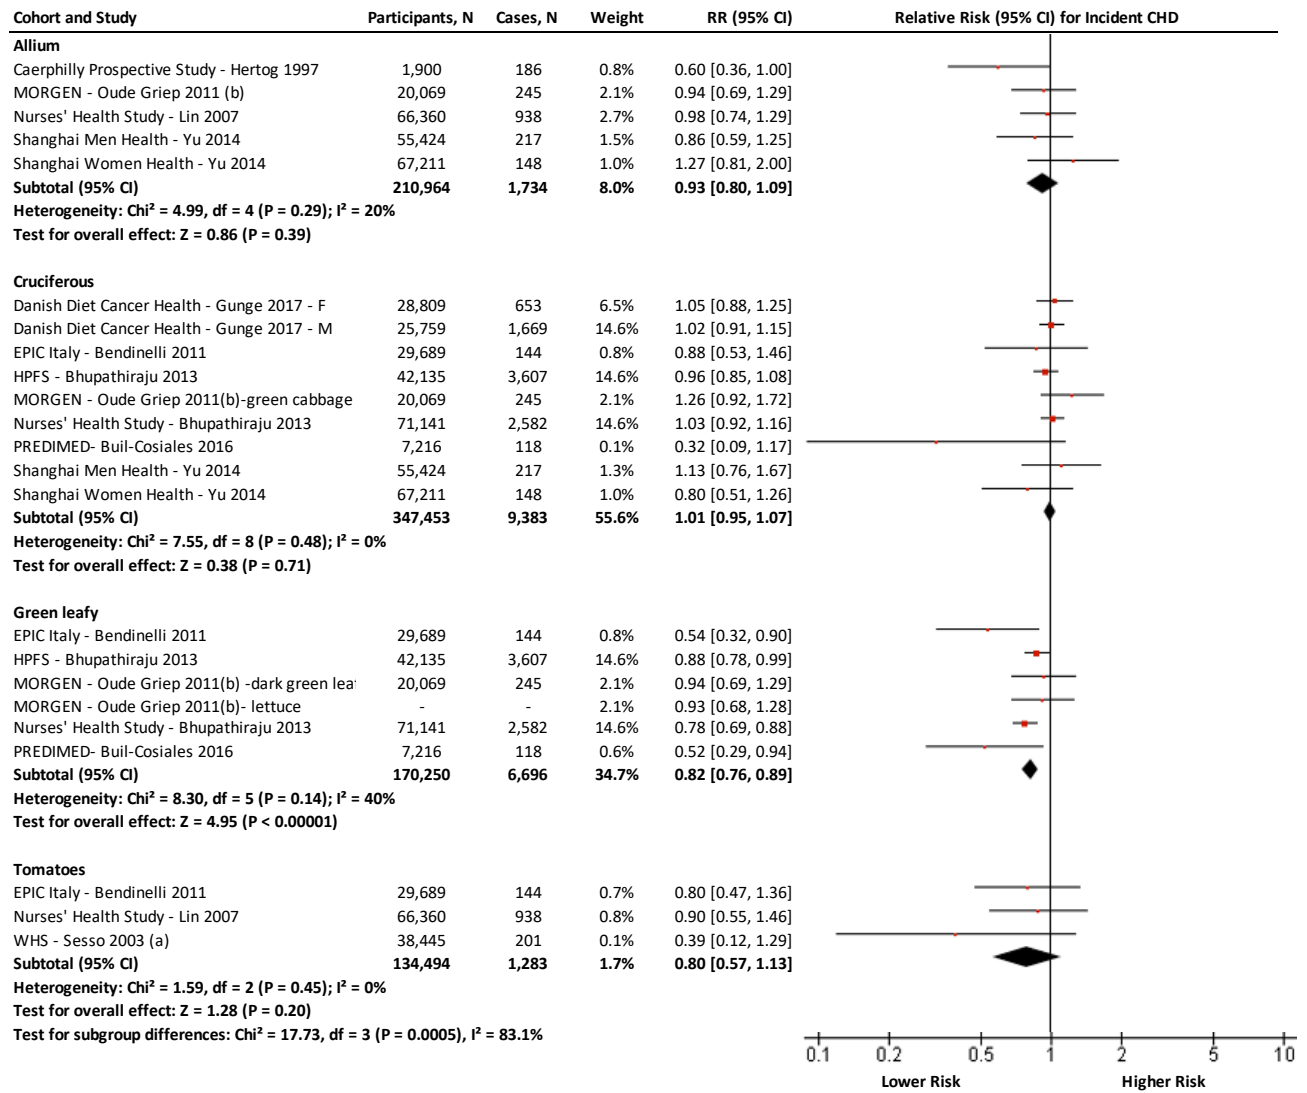

## B. Random Effects

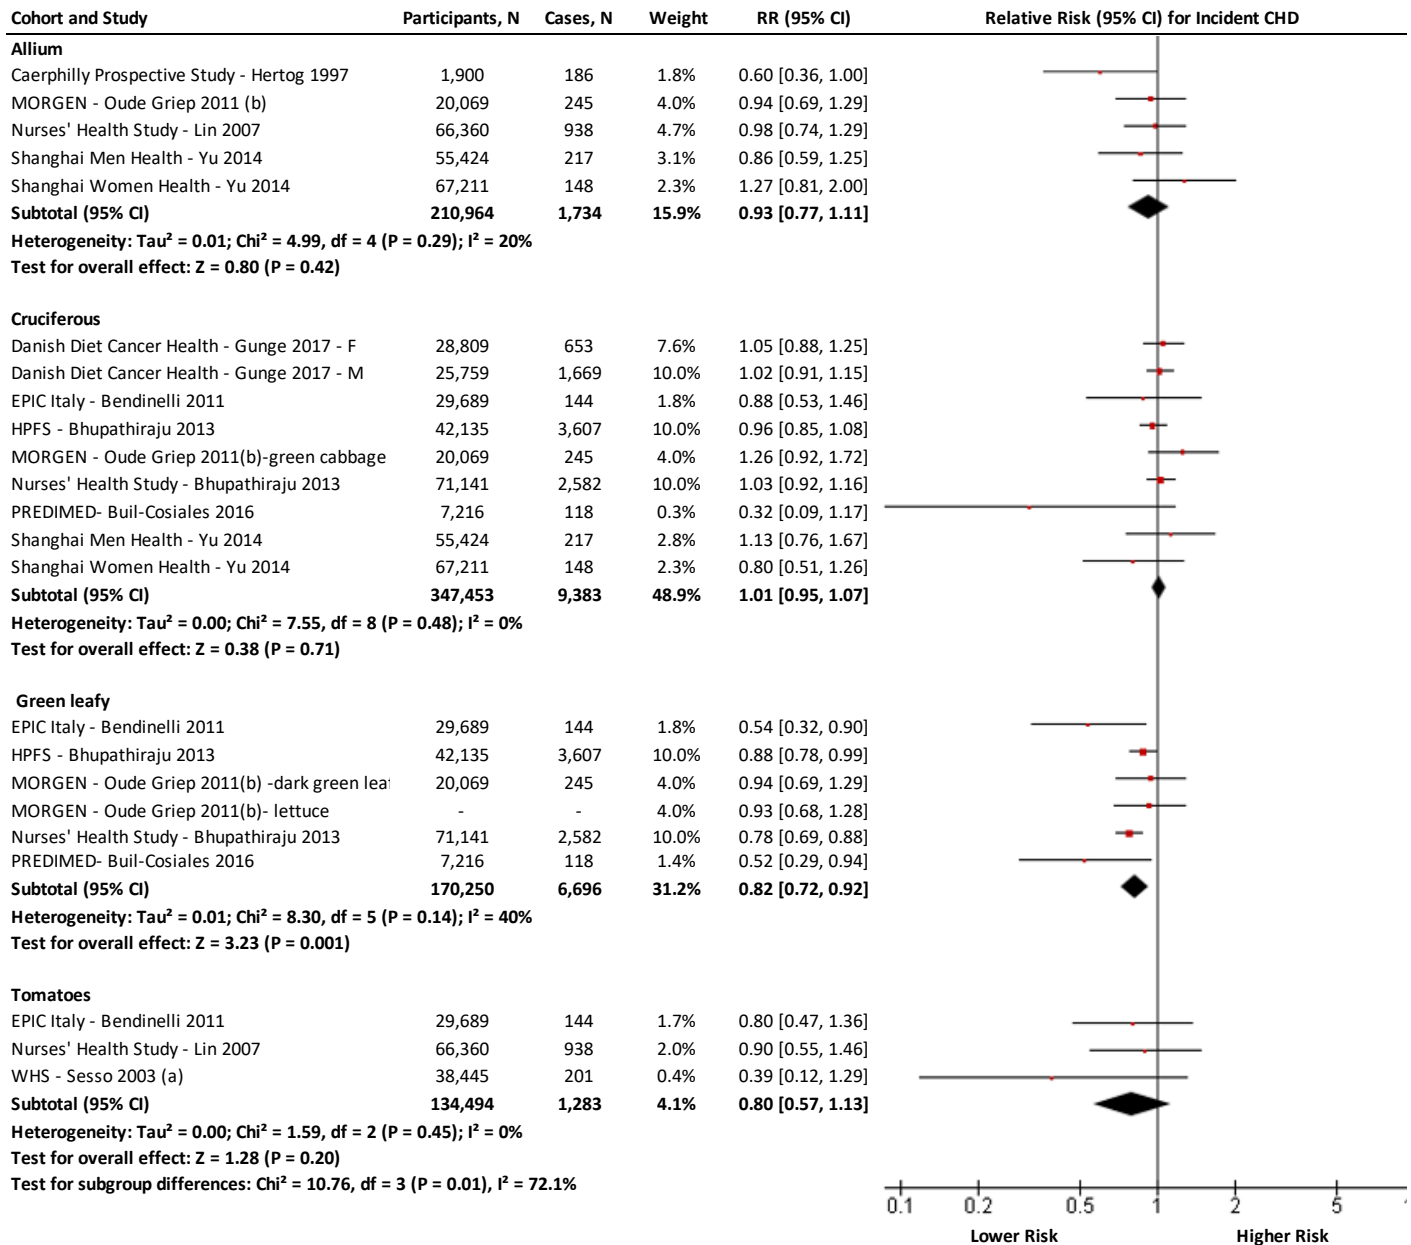

**Figure S71.** Relation between sources of vegetables and CHD incidence (highest vs. lowest level of intake). All results are presented as relative risk (RR) with 95% confidence intervals (95% CI). Pooled risk estimate is represented by the black diamond using (A) fixed effects and (B) random effects models. Inter-study heterogeneity was assessed using the Cochran Q statistic (Chi<sup>2</sup>) at a significance level of p<0.10, and quantified by I<sup>2</sup>, with values ≥ 50% indicating substantial heterogeneity.



## TOTAL FRUIT AND VEGETABLES AND CORONARY HEART DISEASE MORTALITY

### A. Fixed Effects

| Cohort and Study                                 | Participants, N | Cases, N     | Weight        | RR (95% CI)              |
|--------------------------------------------------|-----------------|--------------|---------------|--------------------------|
| National Health & Nutrition - Bazzano 2002       | 9,608           | 639          | 15.9%         | 0.76 [0.56, 1.04]        |
| Baltimore Longitudinal Study Aging - Tucker 2005 | 501             | 71           | 3.0%          | 0.62 [0.30, 1.28]        |
| EPIC - Leenders 2014                             | 451,151         | 2,139        | 63.5%         | 0.86 [0.74, 1.01]        |
| NIPPON DATA80 - Okuda 2015                       | 9,112           | 165          | 8.4%          | 0.57 [0.37, 0.88]        |
| HAPIEE - Stefler 2016                            | 19,263          | 226          | 9.2%          | 0.92 [0.61, 1.39]        |
| <b>Total (95% CI)</b>                            | <b>489,635</b>  | <b>3,240</b> | <b>100.0%</b> | <b>0.81 [0.72, 0.92]</b> |

Heterogeneity:  $\text{Chi}^2 = 4.15$ ,  $\text{df} = 4$  ( $P = 0.39$ );  $I^2 = 4\%$   
 Test for overall effect:  $Z = 3.24$  ( $P = 0.001$ )

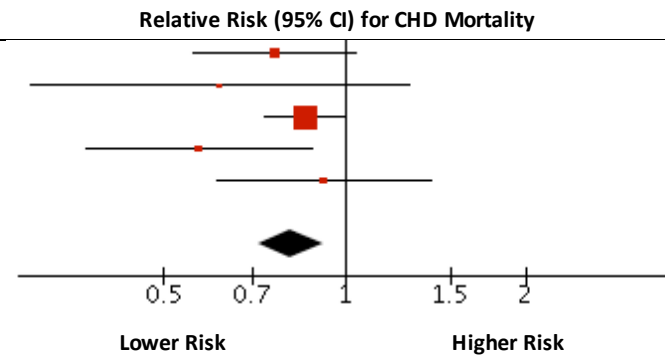

### B. Random Effects

| Cohort and Study                                 | Participants, N | Cases, N     | Weight        | RR (95% CI)              |
|--------------------------------------------------|-----------------|--------------|---------------|--------------------------|
| National Health & Nutrition - Bazzano 2002       | 9,608           | 639          | 17.0%         | 0.76 [0.56, 1.04]        |
| Baltimore Longitudinal Study Aging - Tucker 2005 | 501             | 71           | 3.3%          | 0.62 [0.30, 1.28]        |
| EPIC - Leenders 2014                             | 451,151         | 2,139        | 60.6%         | 0.86 [0.74, 1.01]        |
| NIPPON DATA80 - Okuda 2015                       | 9,112           | 165          | 9.2%          | 0.57 [0.37, 0.88]        |
| HAPIEE - Stefler 2016                            | 19,263          | 226          | 10.0%         | 0.92 [0.61, 1.39]        |
| <b>Total (95% CI) [Random Effects]</b>           | <b>489,635</b>  | <b>3,240</b> | <b>100.0%</b> | <b>0.81 [0.71, 0.92]</b> |

Heterogeneity:  $\text{Tau}^2 = 0.00$ ;  $\text{Chi}^2 = 4.15$ ,  $\text{df} = 4$  ( $P = 0.39$ );  $I^2 = 4\%$   
 Test for overall effect:  $Z = 3.15$  ( $P = 0.002$ )

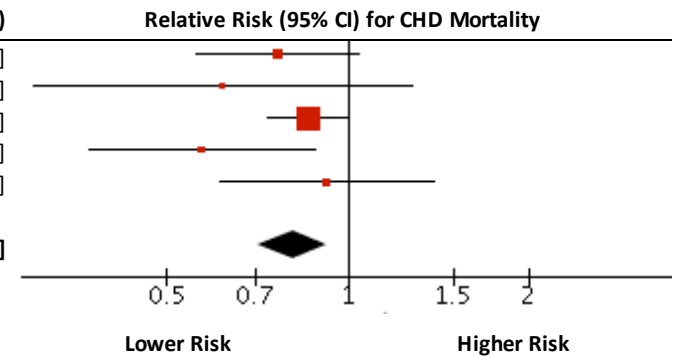

**Figure S72.** Relation between total fruit and vegetable intake and coronary heart disease mortality (highest vs. lowest level of intake). All results are presented as relative risk (RR) with 95% confidence intervals (95% CI). Pooled risk estimate is represented by the black diamond using (A) fixed effects and (B) random effects models. Inter-study heterogeneity was assessed using the Cochran Q statistic ( $\text{Chi}^2$ ) at a significance level of  $p < 0.10$ , and quantified by  $I^2$ , with values  $\geq 50\%$  indicating substantial heterogeneity.

## FRUIT AND CORONARY HEART DISEASE MORTALITY

### A. Fixed Effects

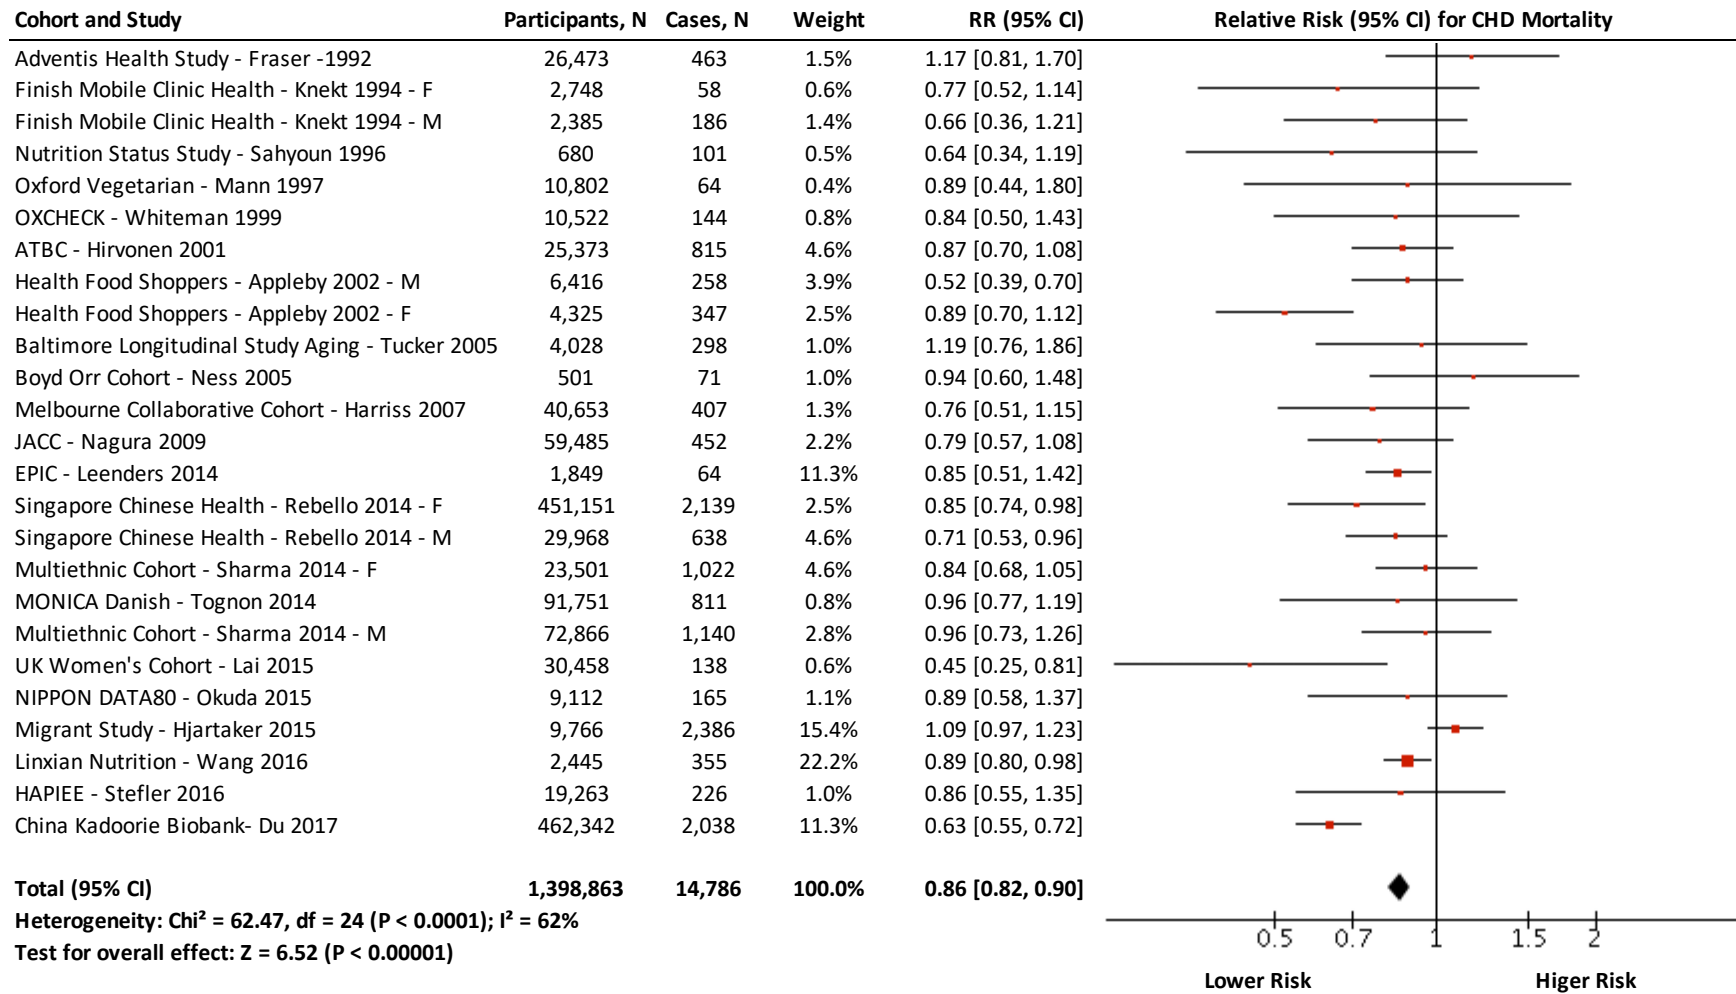

## B. Random Effects

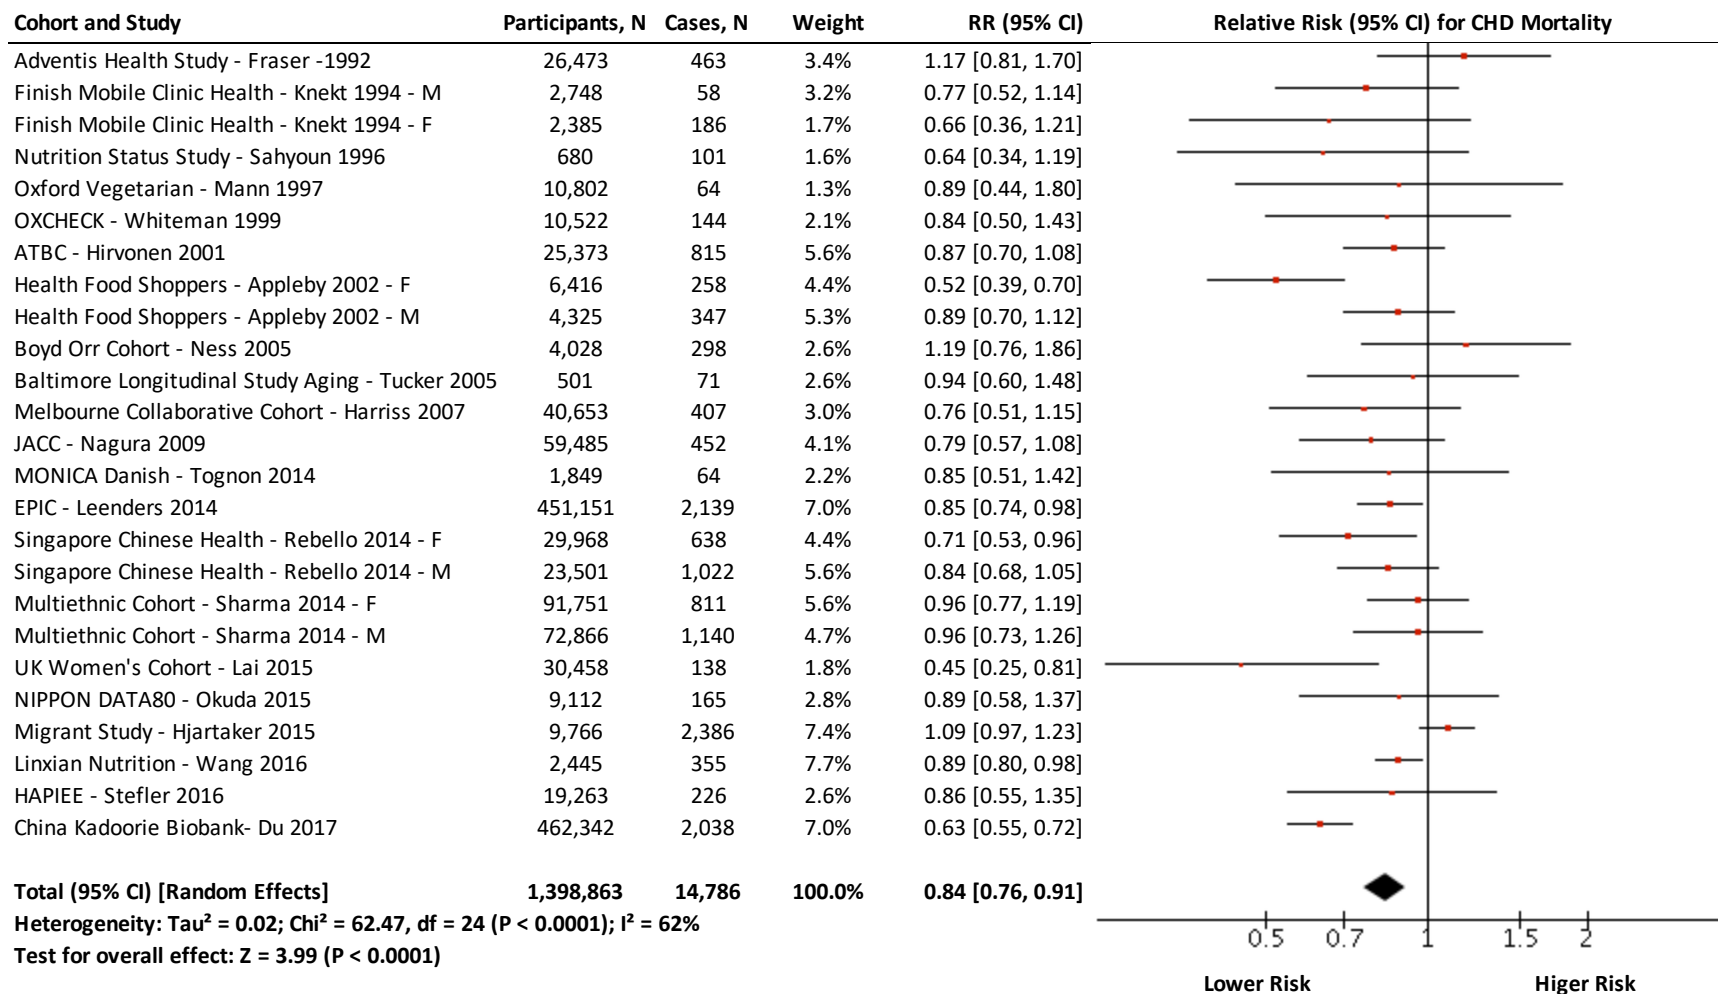

**Figure S73.** Relation between fruit intake and coronary heart disease mortality (highest vs. lowest level of intake). All results are presented as relative risk (RR) with 95% confidence intervals (95% CI). Pooled risk estimate is represented by the black diamond using (A) fixed effects and (B) random effects models. Inter-study heterogeneity was assessed using the Cochran Q statistic (Chi<sup>2</sup>) at a significance level of p<0.10, and quantified by I<sup>2</sup>, with values ≥ 50% indicating substantial heterogeneity.

## VEGETABLES AND CORONARY HEART DISEASE MORTALITY

### A. Fixed Effects

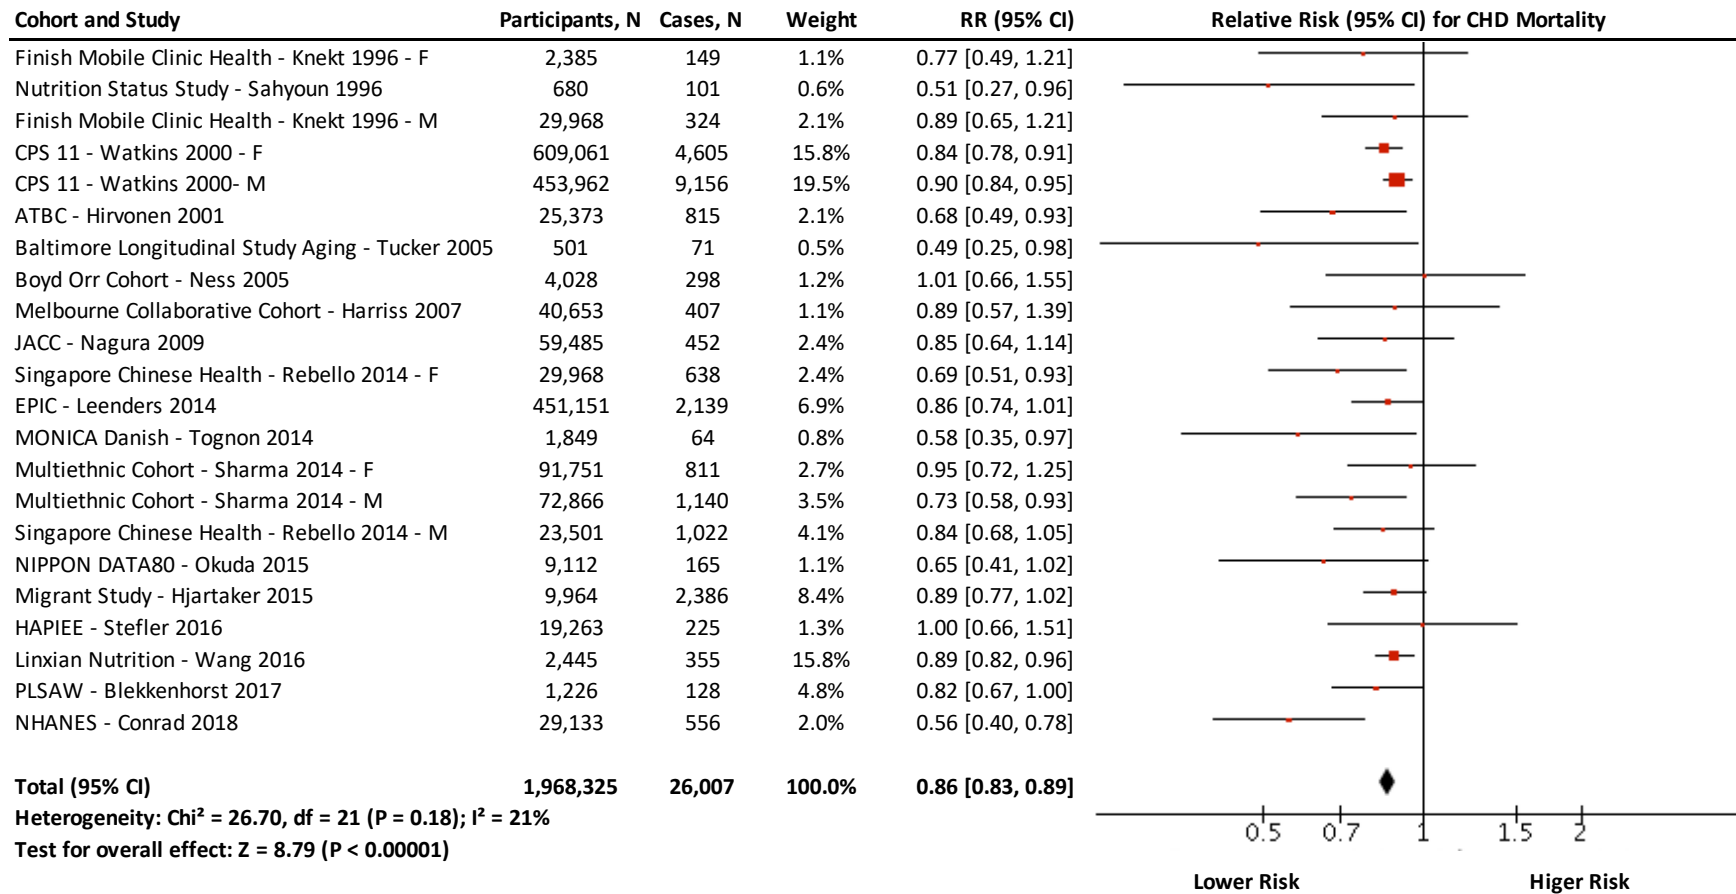

## B. Random Effects

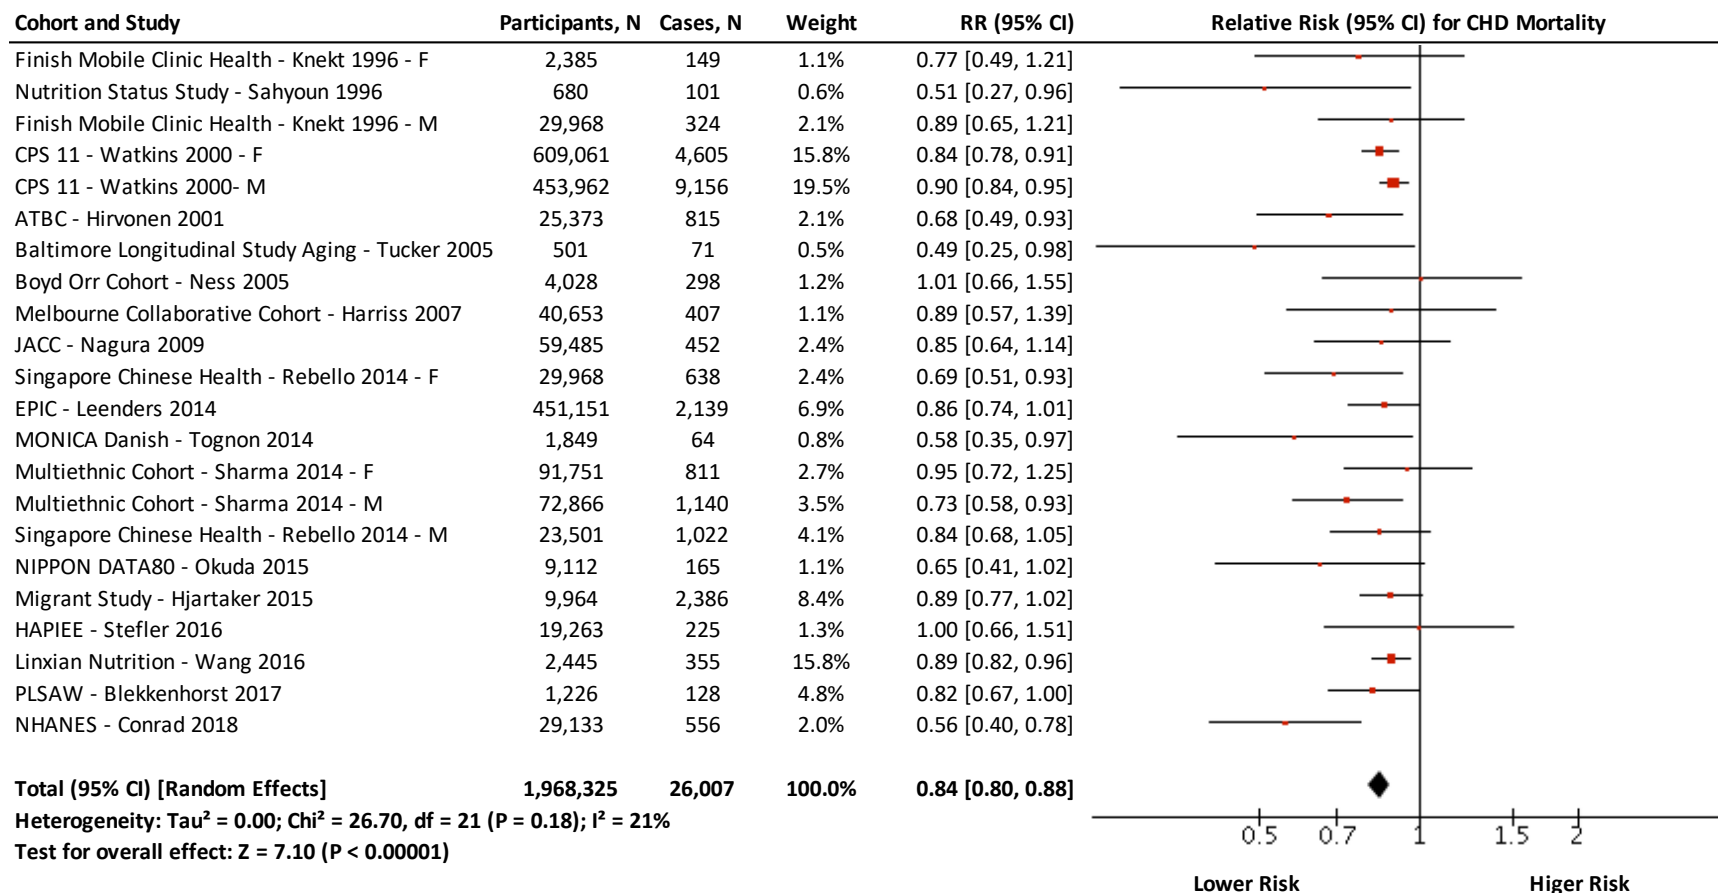

**Figure S74.** Relation between intake of vegetables and coronary heart disease mortality (highest vs. lowest level of intake). All results are presented as relative risk (RR) with 95% confidence intervals (95% CI). Pooled risk estimate is represented by the black diamond using (A) fixed effects and (B) random effects models. Inter-study heterogeneity was assessed using the Cochran Q statistic (Chi<sup>2</sup>) at a significance level of p<0.10, and quantified by I<sup>2</sup>, with values ≥ 50% indicating substantial heterogeneity.

## BANANAS AND CORONARY HEART DISEASE MORTALITY

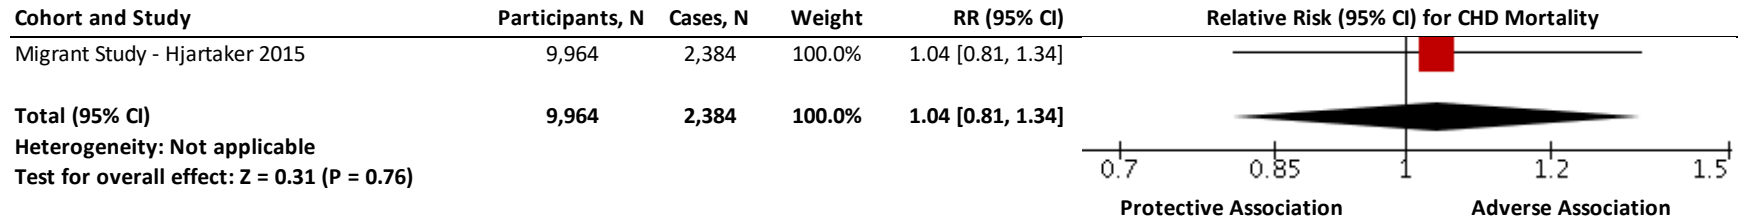

**Figure S75.** Relation between intake of bananas and coronary heart disease mortality (highest vs. lowest level of intake). All results are presented as relative risk (RR) with 95% confidence intervals (95% CI). Pooled risk estimate is represented by the black diamond. Inter-study heterogeneity was assessed using the Cochran Q statistic ( $\text{Chi}^2$ ) at a significance level of  $p < 0.10$ , and quantified by  $I^2$ , with values  $\geq 50\%$  indicating substantial heterogeneity.

## BERRIES AND CORONARY HEART DISEASE MORTALITY

### A. Fixed Effects

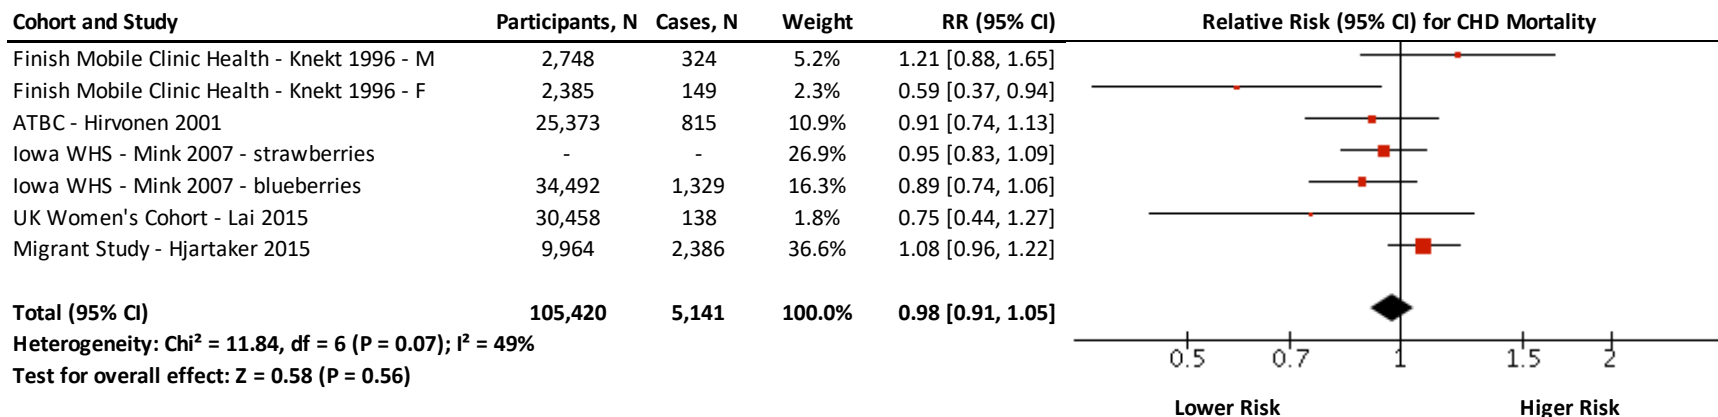

### B. Random Effects

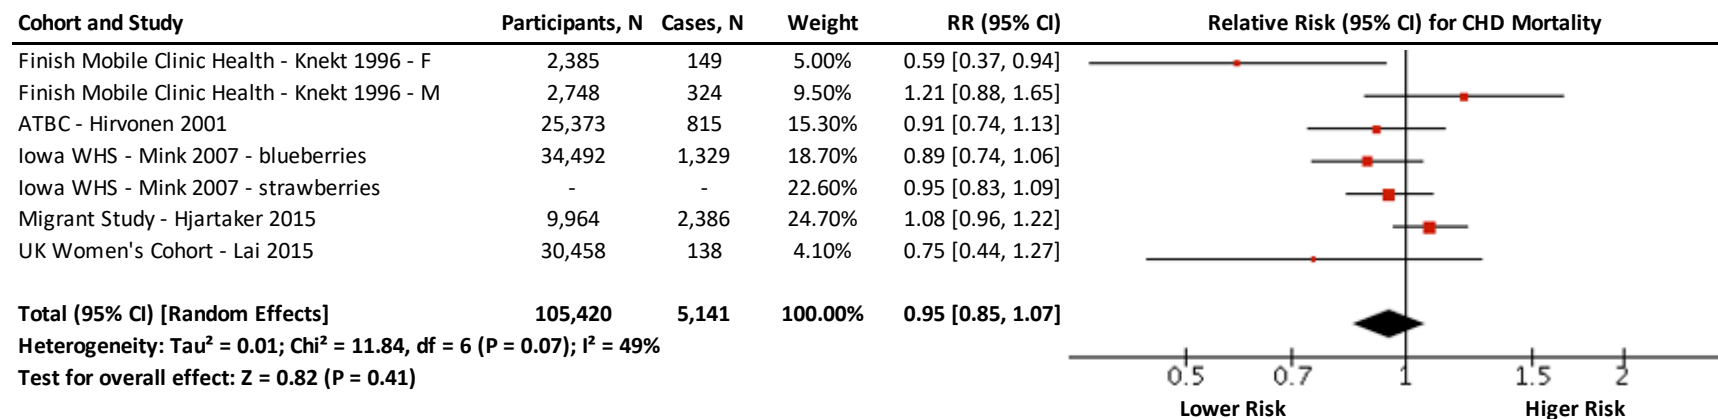

**Figure S76.** Relation between intake of berries and coronary heart disease mortality (highest vs. lowest level of intake). All results are presented as relative risk (RR) with 95% confidence intervals (95% CI). Pooled risk estimate is represented by the black diamond using (A) fixed effects and (B) random effects models. Inter-study heterogeneity was assessed using the Cochran Q statistic ( $\chi^2$ ) at a significance level of  $p < 0.10$ , and quantified by  $I^2$ , with values  $\geq 50\%$  indicating substantial heterogeneity.

## CITRUS FRUIT AND CORONARY HEART DISEASE MORTALITY

### A. Fixed Effects

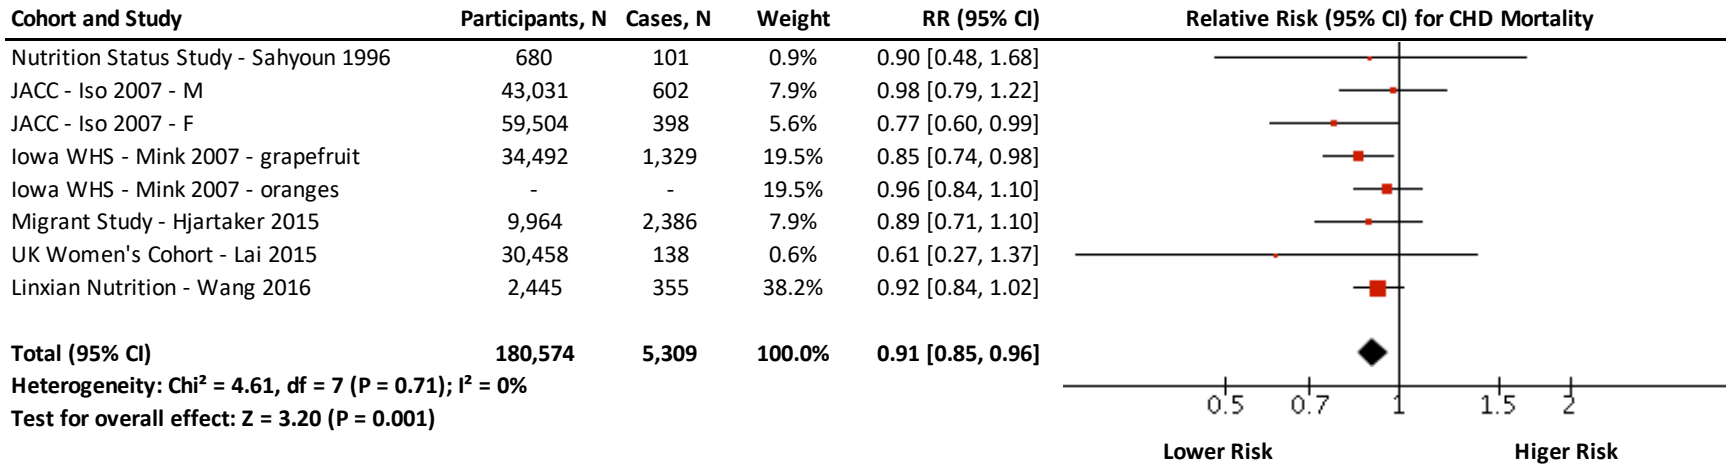

### B. Random Effects

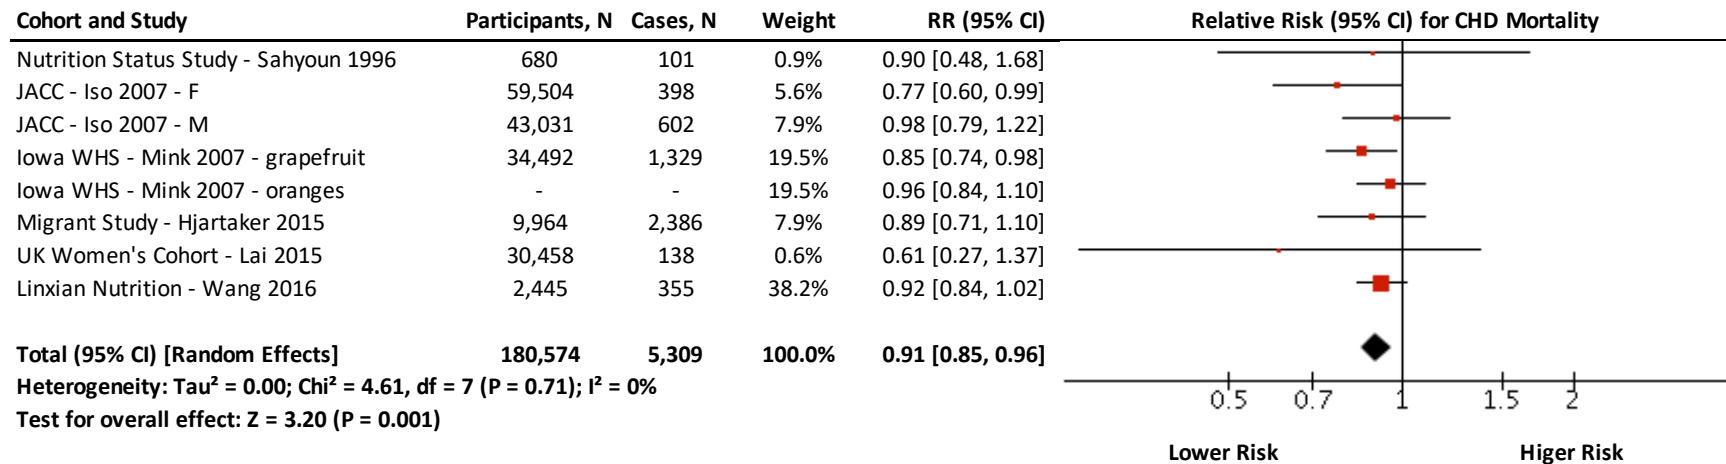

**Figure S77.** Relation between citrus fruit intake and coronary heart disease mortality (highest vs. lowest level of intake). All results are presented as relative risk (RR) with 95% confidence intervals (95% CI). Pooled risk estimate is represented by the black diamond using (A) fixed effects and (B) random effects models. Inter-study heterogeneity was assessed using the Cochran Q statistic (Chi<sup>2</sup>) at a significance level of p<0.10, and quantified by I<sup>2</sup>, with values ≥ 50% indicating substantial heterogeneity.



## DRIED FRUIT AND CORONARY HEART DISEASE MORTALITY

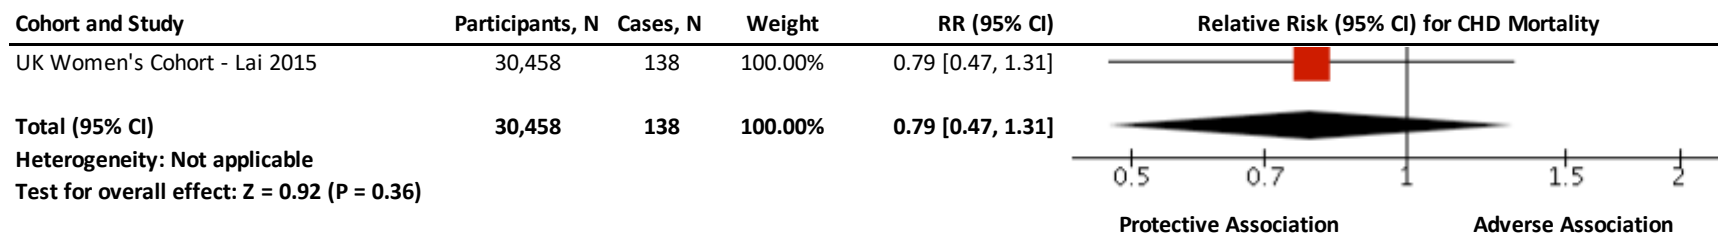

**Figure S78.** Relation between dried fruit intake and coronary heart disease mortality (highest vs. lowest level of intake). All results are presented as relative risk (RR) with 95% confidence intervals (95% CI). Pooled risk estimate is represented by the black diamond. Inter-study heterogeneity was assessed using the Cochran Q statistic (Chi<sup>2</sup>) at a significance level of p<0.10, and quantified by I<sup>2</sup>, with values ≥ 50% indicating substantial heterogeneity.

## FRUIT JUICE AND CORONARY HEART DISEASE MORTALITY

### A. Fixed Effects

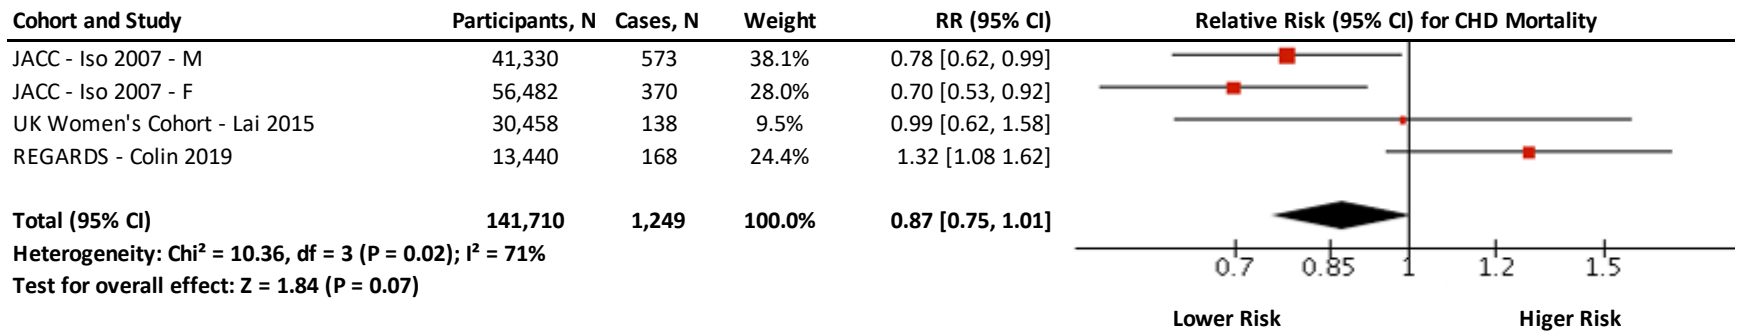

### B. Random Effects

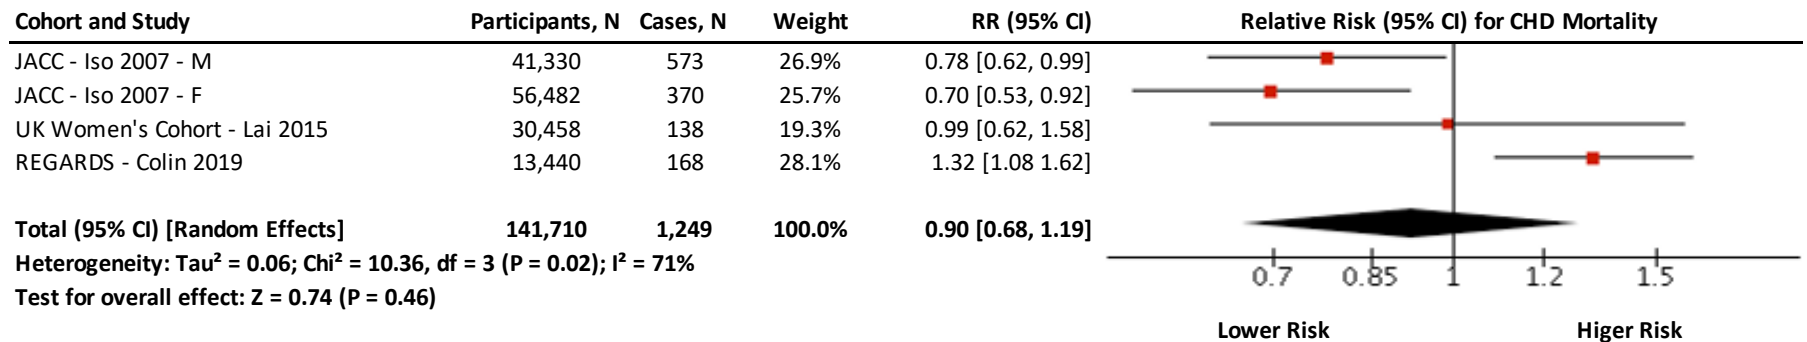

**Figure S79.** Relation between intake of fruit juice and coronary heart disease mortality (highest vs. lowest level of intake). All results are presented as relative risk (RR) with 95% confidence intervals (95% CI). Pooled risk estimate is represented by the black diamond using (A) fixed effects and (B) random effects models. Inter-study heterogeneity was assessed using the Cochran Q statistic ( $\chi^2$ ) at a significance level of  $p < 0.10$ , and quantified by  $I^2$ , with values  $\geq 50\%$  indicating substantial heterogeneity.

## GRAPES AND CORONARY HEART DISEASE MORTALITY

### A. Fixed Effects

| Cohort and Study                      | Participants, N | Cases, N     | Weight        | RR (95% CI)              |
|---------------------------------------|-----------------|--------------|---------------|--------------------------|
| Nurses' Health Study - Lin 2007       | 66,360          | 324          | 9.5%          | 1.14 [0.55, 2.35]        |
| UK Women's Cohort - Lai 2015 - grapes | 30,458          | 138          | 13.5%         | 0.57 [0.31, 1.05]        |
| Migrant Study - Hjartaker 2015        | 9,964           | 2,384        | 77.0%         | 1.04 [0.81, 1.34]        |
| <b>Total (95% CI)</b>                 | <b>106,782</b>  | <b>2,846</b> | <b>100.0%</b> | <b>0.97 [0.77, 1.21]</b> |

Heterogeneity:  $\text{Chi}^2 = 3.40$ ,  $\text{df} = 2$  ( $P = 0.18$ );  $I^2 = 41\%$   
 Test for overall effect:  $Z = 0.29$  ( $P = 0.77$ )

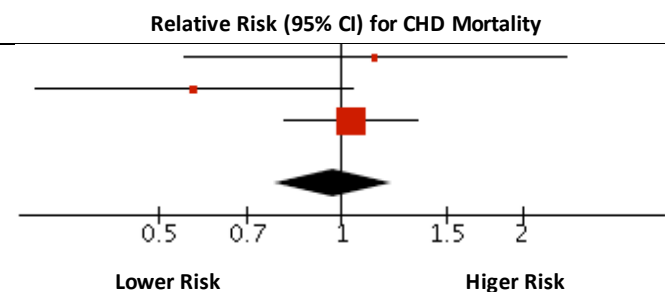

### B. Random Effects

| Cohort and Study                       | Participants, N | Cases, N     | Weight        | RR (95% CI)              |
|----------------------------------------|-----------------|--------------|---------------|--------------------------|
| Nurses' Health Study - Lin 2007        | 66,360          | 324          | 19.5%         | 1.14 [0.55, 2.35]        |
| UK Women's Cohort - Lai 2015 - grapes  | 30,458          | 138          | 25.0%         | 0.57 [0.31, 1.05]        |
| Migrant Study - Hjartaker 2015         | 9,964           | 2,384        | 55.5%         | 1.04 [0.81, 1.34]        |
| <b>Total (95% CI) [Random Effects]</b> | <b>106,782</b>  | <b>2,846</b> | <b>100.0%</b> | <b>0.91 [0.63, 1.32]</b> |

Heterogeneity:  $\text{Tau}^2 = 0.05$ ;  $\text{Chi}^2 = 3.40$ ,  $\text{df} = 2$  ( $P = 0.18$ );  $I^2 = 41\%$   
 Test for overall effect:  $Z = 0.49$  ( $P = 0.63$ )

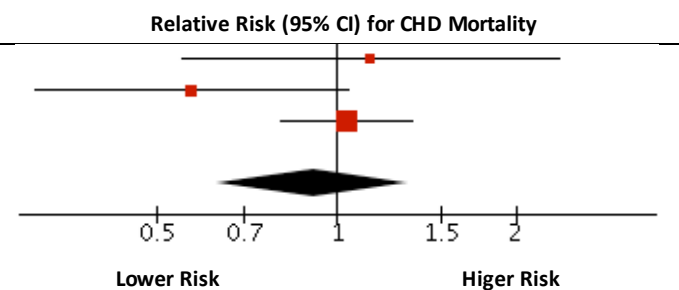

**Figure S80.** Relation between intake of grapes and coronary heart disease mortality (highest vs. lowest level of intake). All results are presented as relative risk (RR) with 95% confidence intervals (95% CI). Pooled risk estimate is represented by the black diamond using (A) fixed effects and (B) random effects models. Inter-study heterogeneity was assessed using the Cochran Q statistic ( $\text{Chi}^2$ ) at a significance level of  $p < 0.10$ , and quantified by  $I^2$ , with values  $\geq 50\%$  indicating substantial heterogeneity.

## POMMES AND CORONARY HEART DISEASE MORTALITY

### A. Fixed Effects

| Cohort and Study                             | Participants, N | Cases, N | Weight | RR (95% CI)       |
|----------------------------------------------|-----------------|----------|--------|-------------------|
| Finish Mobile Clinic Health - Knekt 1996 - M | 2,748           | 324      | 10.9%  | 0.81 [0.60, 1.09] |
| Finish Mobile Clinic Health - Knekt 1996 - F | 2,385           | 149      | 4.3%   | 0.57 [0.36, 0.91] |
| Nurses' Health Study - Lin 2007              | 66,360          | 324      | 1.6%   | 0.73 [0.34, 1.58] |
| Iowa WHS - Mink 2007                         | 34,492          | 1,329    | 50.0%  | 0.85 [0.74, 0.98] |
| Migrant Study - Hjartaker 2015               | 9,964           | 2,386    | 30.3%  | 0.85 [0.71, 1.02] |
| UK Women's Cohort - Lai 2015                 | 30,458          | 138      | 2.9%   | 1.19 [0.67, 2.09] |

**Total (95% CI)** 146,407 4,650 100.0% 0.84 [0.76, 0.92]

**Heterogeneity: Chi<sup>2</sup> = 4.24, df = 5 (P = 0.52); I<sup>2</sup> = 0%**

**Test for overall effect: Z = 3.54 (P = 0.0004)**

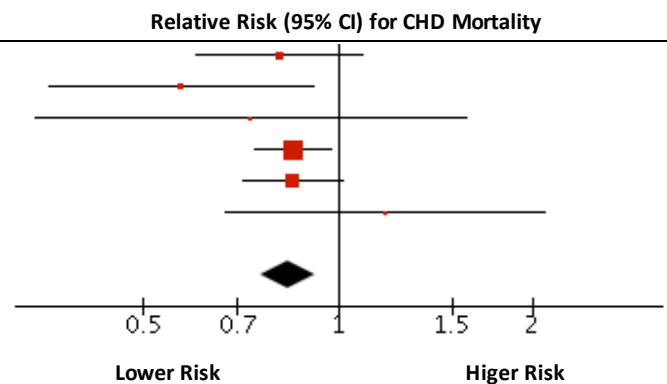

### B. Random Effects

| Cohort and Study                             | Participants, N | Cases, N | Weight | RR (95% CI)       |
|----------------------------------------------|-----------------|----------|--------|-------------------|
| Finish Mobile Clinic Health - Knekt 1996 - F | 2,385           | 149      | 4.3%   | 0.57 [0.36, 0.91] |
| Finish Mobile Clinic Health - Knekt 1996 - M | 2,748           | 324      | 10.9%  | 0.81 [0.60, 1.09] |
| Iowa WHS - Mink 2007                         | 34,492          | 1,329    | 50.0%  | 0.85 [0.74, 0.98] |
| Nurses' Health Study - Lin 2007              | 66,360          | 324      | 1.6%   | 0.73 [0.34, 1.58] |
| UK Women's Cohort - Lai 2015                 | 30,458          | 138      | 2.9%   | 1.19 [0.67, 2.09] |
| Migrant Study - Hjartaker 2015               | 9,964           | 2,386    | 30.3%  | 0.85 [0.71, 1.02] |

**Total (95% CI) [Random Effects]** 146,407 4,650 100.0% 0.84 [0.76, 0.92]

**Heterogeneity: Tau<sup>2</sup> = 0.00; Chi<sup>2</sup> = 4.24, df = 5 (P = 0.52); I<sup>2</sup> = 0%**

**Test for overall effect: Z = 3.54 (P = 0.0004)**

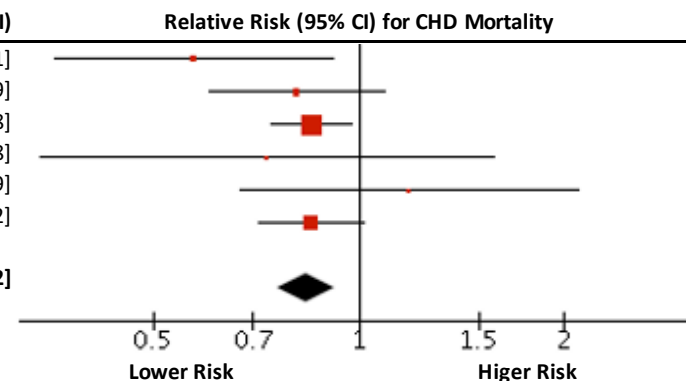

**Figure S81.** Relation between pommes fruit intake and coronary heart disease mortality (highest vs. lowest level of intake). All results are presented as relative risk (RR) with 95% confidence intervals (95% CI). Pooled risk estimate is represented by the black diamond using (A) fixed effects and (B) random effects models. Inter-study heterogeneity was assessed using the Cochran Q statistic (Chi<sup>2</sup>) at a significance level of p<0.10, and quantified by I<sup>2</sup>, with values ≥ 50% indicating substantial heterogeneity.

## ALLIUM VEGETABLES AND CORONARY HEART DISEASE MORTALITY

### A. Fixed Effects

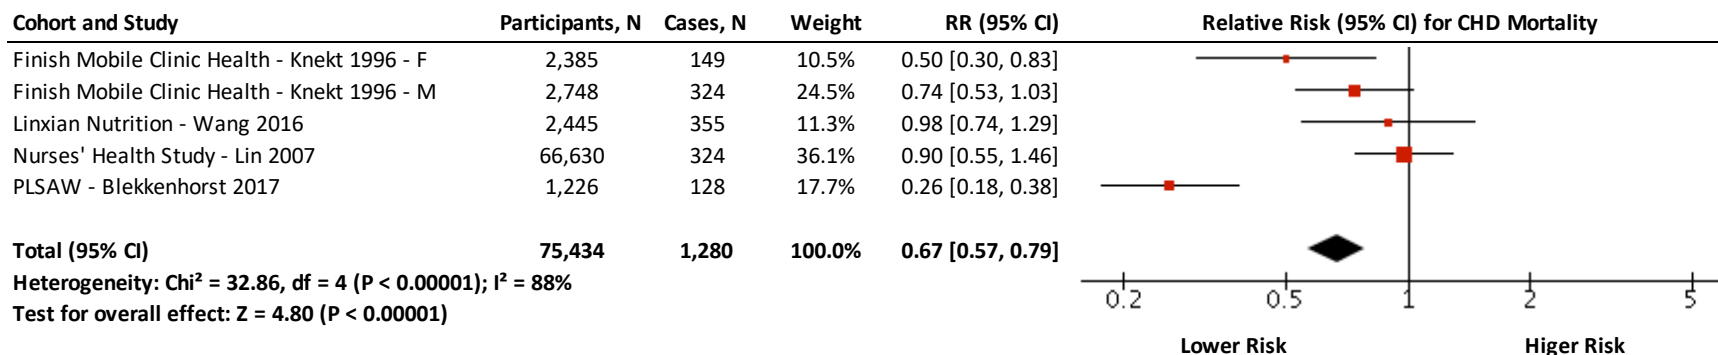

### B. Random Effects

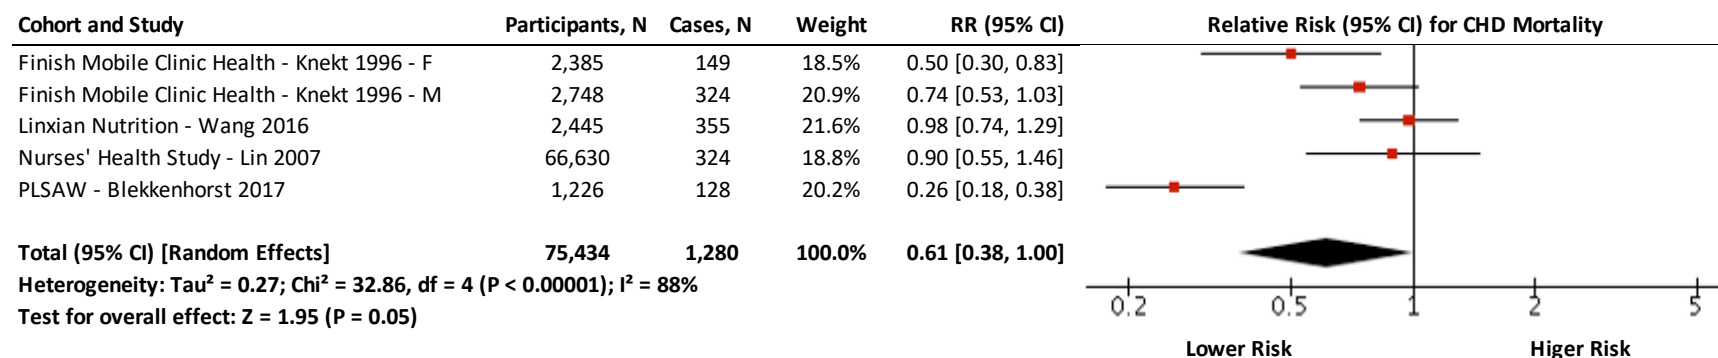

**Figure S82.** Relation between intake of allium vegetables and coronary heart disease mortality (highest vs. lowest level of intake). All results are presented as relative risk (RR) with 95% confidence intervals (95% CI). Pooled risk estimate is represented by the black diamond using (A) fixed effects and (B) random effects models. Inter-study heterogeneity was assessed using the Cochran Q statistic ( $\text{Chi}^2$ ) at a significance level of  $p < 0.10$ , and quantified by  $I^2$ , with values  $\geq 50\%$  indicating substantial heterogeneity.

### CARROTS AND CORONARY HEART DISEASE MORTALITY

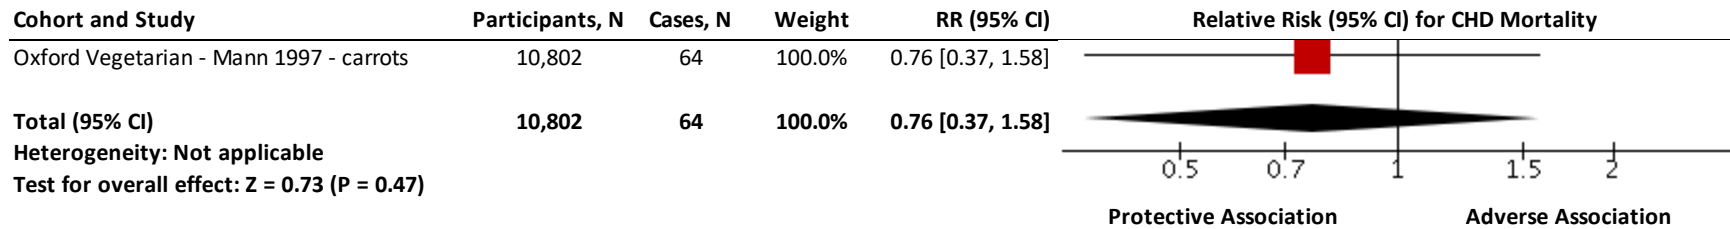

**Supplementary Figure 83.** Relation between intake of carrots and coronary heart disease mortality (highest vs. lowest level of intake). All results are presented as relative risk (RR) with 95% confidence intervals (95% CI). Pooled risk estimate is represented by the black diamond. Inter-study heterogeneity was assessed using the Cochran Q statistic ( $\chi^2$ ) at a significance level of  $p < 0.10$ , and quantified by  $I^2$ , with values  $\geq 50\%$  indicating substantial heterogeneity.

### CELERY AND CORONARY HEART DISEASE MORTALITY

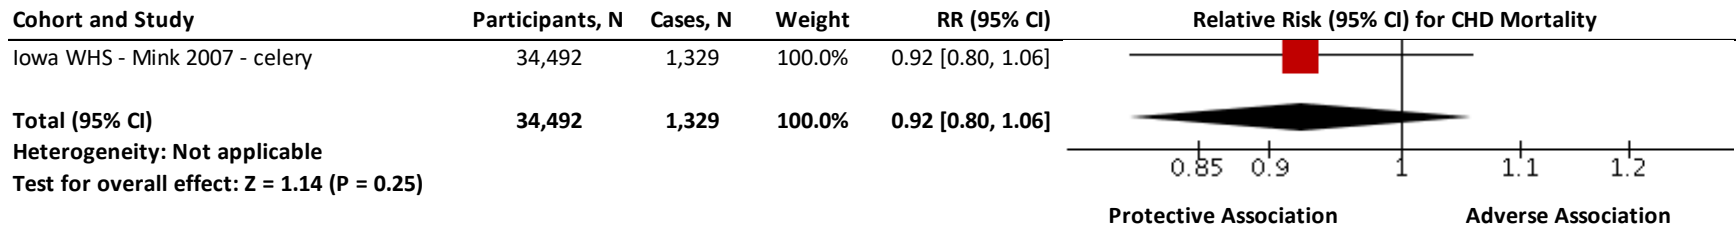

**Figure S84.** Relation between intake of celery and coronary heart disease mortality (highest vs. lowest level of intake). All results are presented as relative risk (RR) with 95% confidence intervals (95% CI). Pooled risk estimate is represented by the black diamond. Inter-study heterogeneity was assessed using the Cochran Q statistic ( $\chi^2$ ) at a significance level of  $p < 0.10$ , and quantified by  $I^2$ , with values  $\geq 50\%$  indicating substantial heterogeneity.

## CRUCIFEROUS VEGETABLES AND CORONARY HEART DISEASE MORTALITY

### A. Fixed Effects

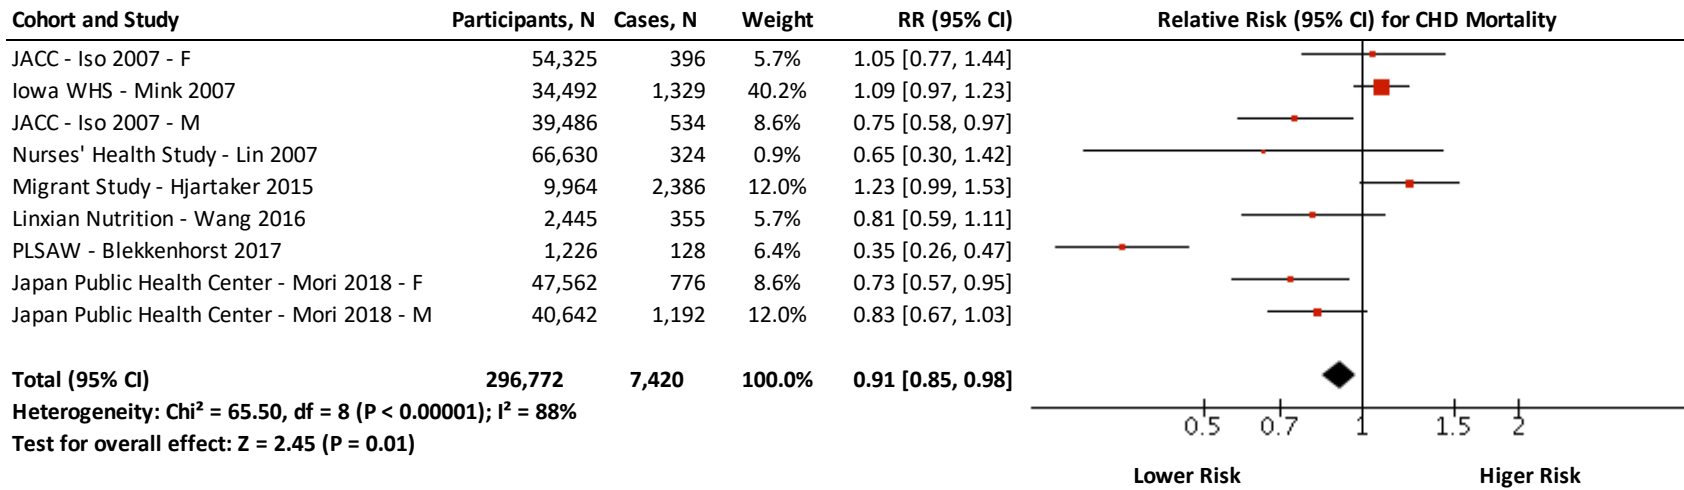

## B. Random Effects

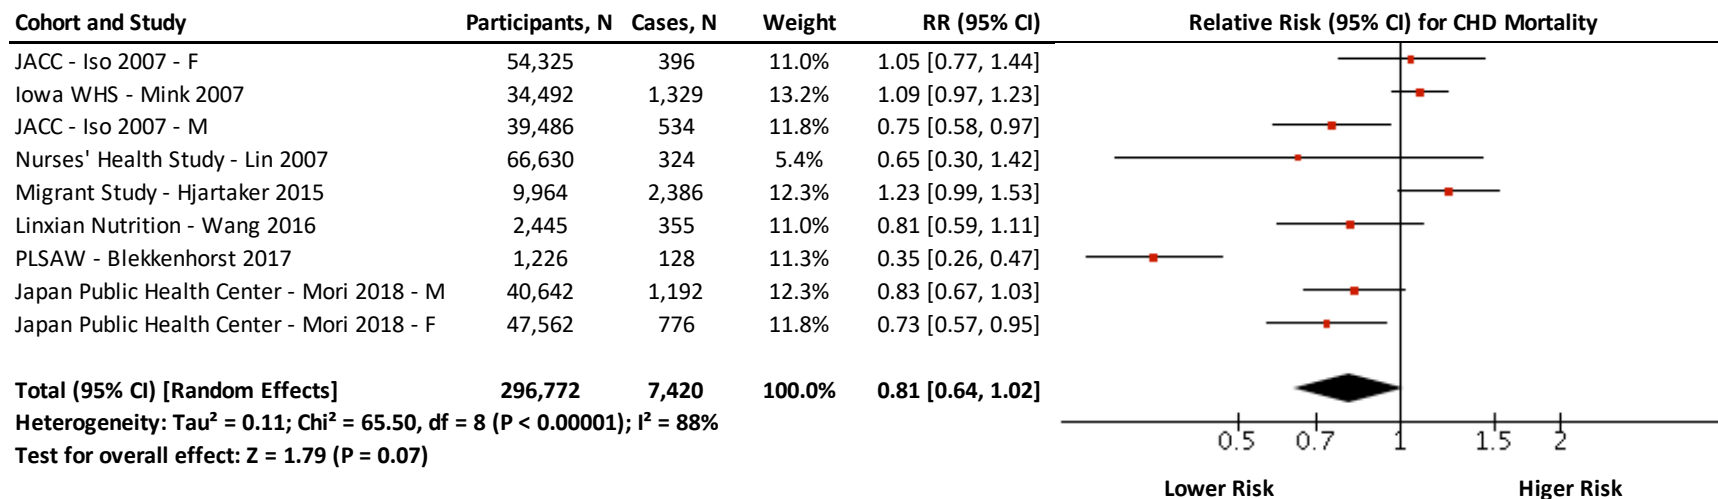

**Figure S85.** Relation between intake of cruciferous vegetables and coronary heart disease mortality (highest vs. lowest level of intake). All results are presented as relative risk (RR) with 95% confidence intervals (95% CI). Pooled risk estimate is represented by the black diamond using (A) fixed effects and (B) random effects models. Inter-study heterogeneity was assessed using the Cochran Q statistic ( $\chi^2$ ) at a significance level of  $p < 0.10$ , and quantified by  $I^2$ , with values  $\geq 50\%$  indicating substantial heterogeneity.



## GREEN LEAFY VEGETABLES AND CORONARY HEART DISEASE MORTALITY

### A. Fixed Effects

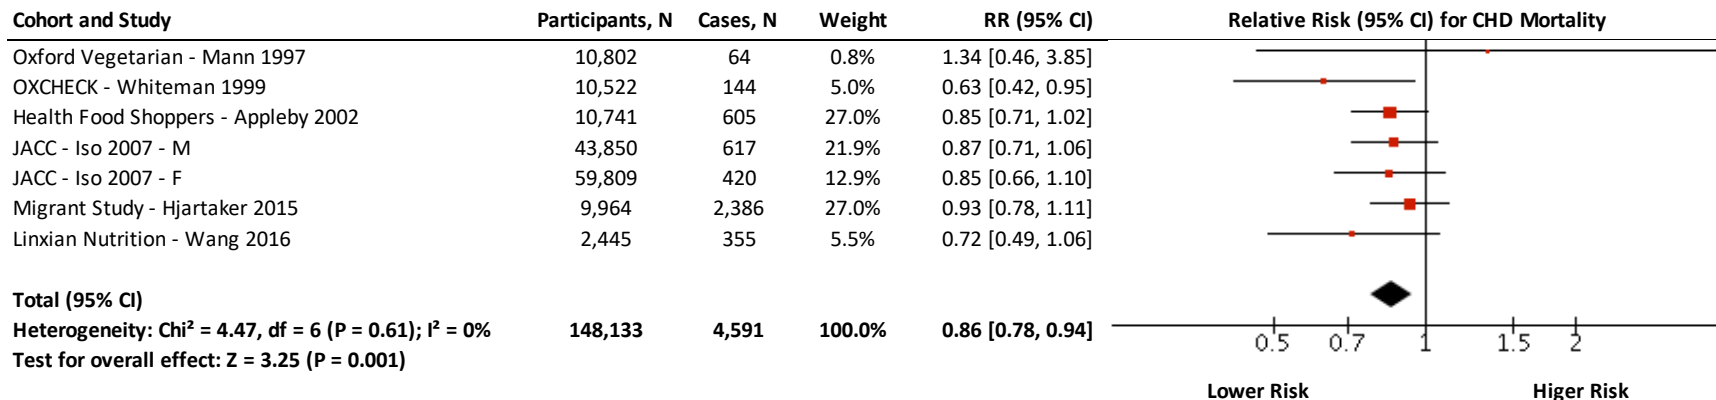

### B. Random Effects

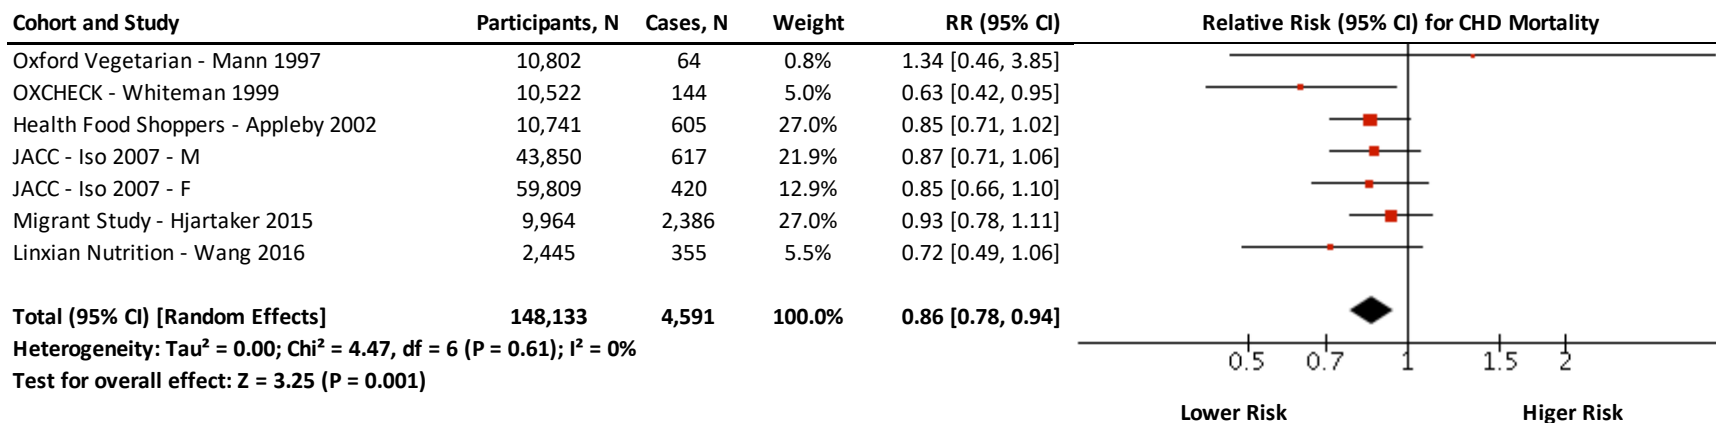

**Figure S86.** Relation between intake of green leafy vegetables and coronary heart disease mortality (highest vs. lowest level of intake). All results are presented as relative risk (RR) with 95% confidence intervals (95% CI). Pooled risk estimate is represented by the black diamond using (A) fixed effects and (B) random effects models. Inter-study heterogeneity was assessed using the Cochran Q statistic ( $\text{Chi}^2$ ) at a significance level of  $p < 0.10$ , and quantified by  $I^2$ , with values  $\geq 50\%$  indicating substantial heterogeneity.

## TOMATOES AND CORONARY HEART DISEASE MORTALITY

### A. Fixed Effects

| Cohort and Study                                                                    | Participants, N | Cases, N     | Weight        | RR (95% CI)              |
|-------------------------------------------------------------------------------------|-----------------|--------------|---------------|--------------------------|
| JACC - Iso 2007 - tomatoes - M                                                      | 41,547          | 568          | 29.7%         | 0.85 [0.69, 1.06]        |
| JACC - Iso 2007 - tomatoes - F                                                      | 56,947          | 379          | 18.3%         | 1.07 [0.82, 1.41]        |
| Nurses' Health Study - Lin 2007                                                     | 66,630          | 324          | 16.0%         | 0.90 [0.67, 1.20]        |
| Migrant Study - Hjartaker 2015                                                      | 9,964           | 2,386        | 36.0%         | 0.92 [0.76, 1.12]        |
| <b>Total (95% CI)</b>                                                               | <b>175,088</b>  | <b>3,657</b> | <b>100.0%</b> | <b>0.92 [0.82, 1.04]</b> |
| <b>Heterogeneity: Chi<sup>2</sup> = 1.72, df = 3 (P = 0.63); I<sup>2</sup> = 0%</b> |                 |              |               |                          |
| <b>Test for overall effect: Z = 1.35 (P = 0.18)</b>                                 |                 |              |               |                          |

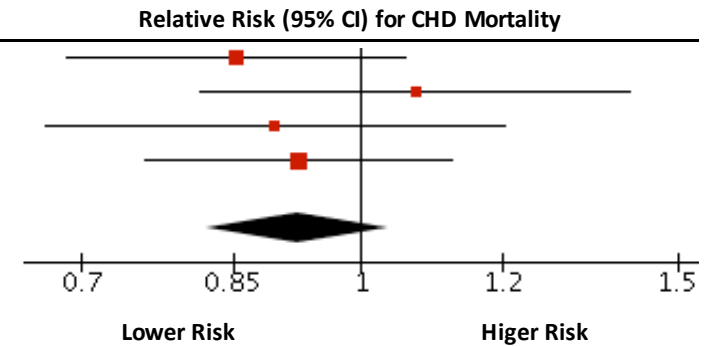

### B. Random Effects

| Cohort and Study                                                                                            | Participants, N | Cases, N     | Weight        | RR (95% CI)              |
|-------------------------------------------------------------------------------------------------------------|-----------------|--------------|---------------|--------------------------|
| JACC - Iso 2007 - males - tomatoes                                                                          | 41,547          | 568          | 29.7%         | 0.85 [0.69, 1.06]        |
| Nurses' Health Study - Lin 2007                                                                             | 66,630          | 324          | 16.0%         | 0.90 [0.67, 1.20]        |
| JACC - Iso 2007 - tomatoes - F                                                                              | 56,947          | 379          | 18.3%         | 1.07 [0.82, 1.41]        |
| Migrant Study - Hjartaker 2015                                                                              | 9,964           | 2,386        | 36.0%         | 0.92 [0.76, 1.12]        |
| <b>Total (95% CI) [Random Effects]</b>                                                                      | <b>175,088</b>  | <b>3,657</b> | <b>100.0%</b> | <b>0.92 [0.82, 1.04]</b> |
| <b>Heterogeneity: Tau<sup>2</sup> = 0.00; Chi<sup>2</sup> = 1.72, df = 3 (P = 0.63); I<sup>2</sup> = 0%</b> |                 |              |               |                          |
| <b>Test for overall effect: Z = 1.35 (P = 0.18)</b>                                                         |                 |              |               |                          |

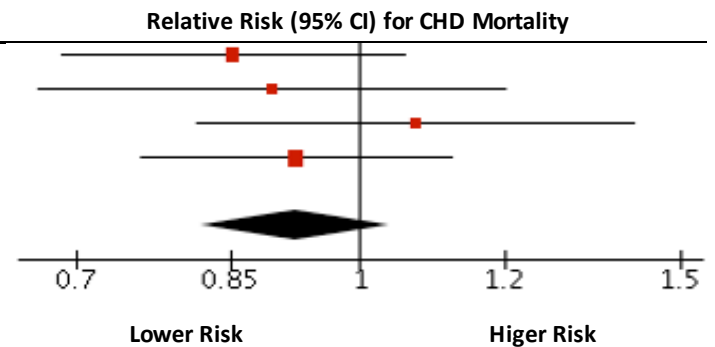

**Figure S87.** Relation between intake of tomatoes and coronary heart disease mortality (highest vs. lowest level of intake). All results are presented as relative risk (RR) with 95% confidence intervals (95% CI). Pooled risk estimate is represented by the black diamond using (A) fixed effects and (B) random effects models. Inter-study heterogeneity was assessed using the Cochran Q statistic (Chi<sup>2</sup>) at a significance level of p<0.10, and quantified by I<sup>2</sup>, with values ≥ 50% indicating substantial heterogeneity.

## A. Fixed Effects

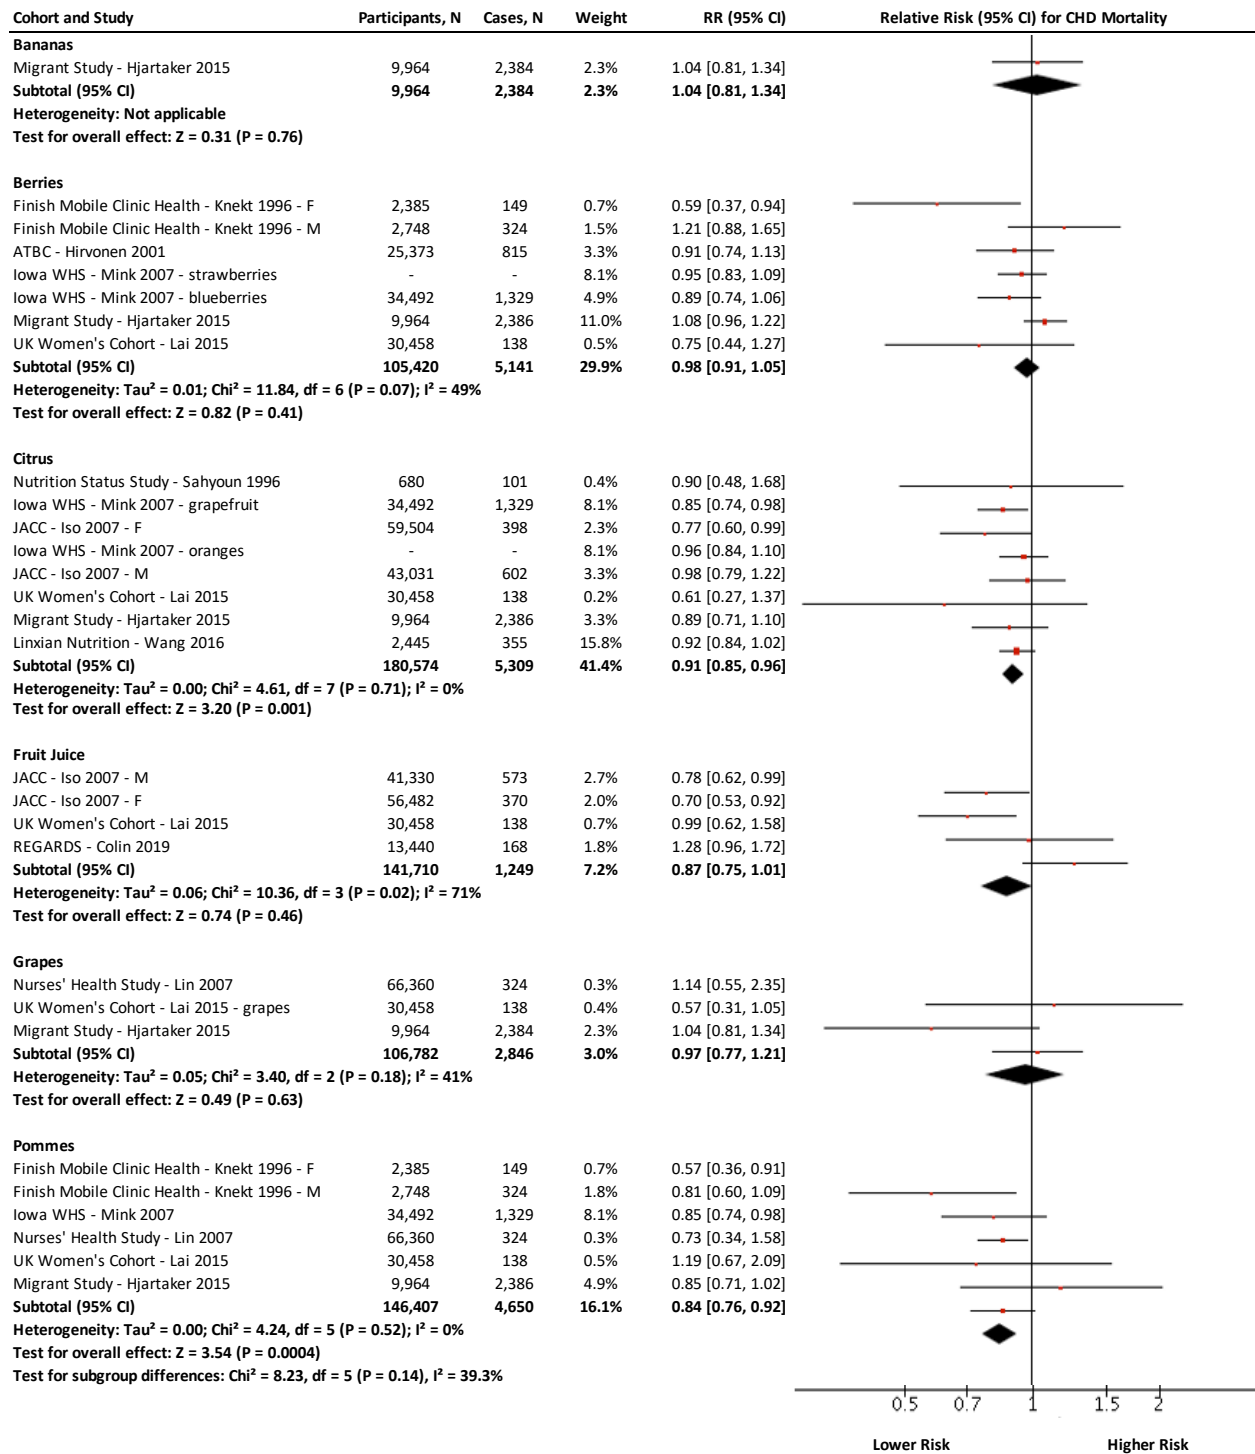

## B. Random Effects

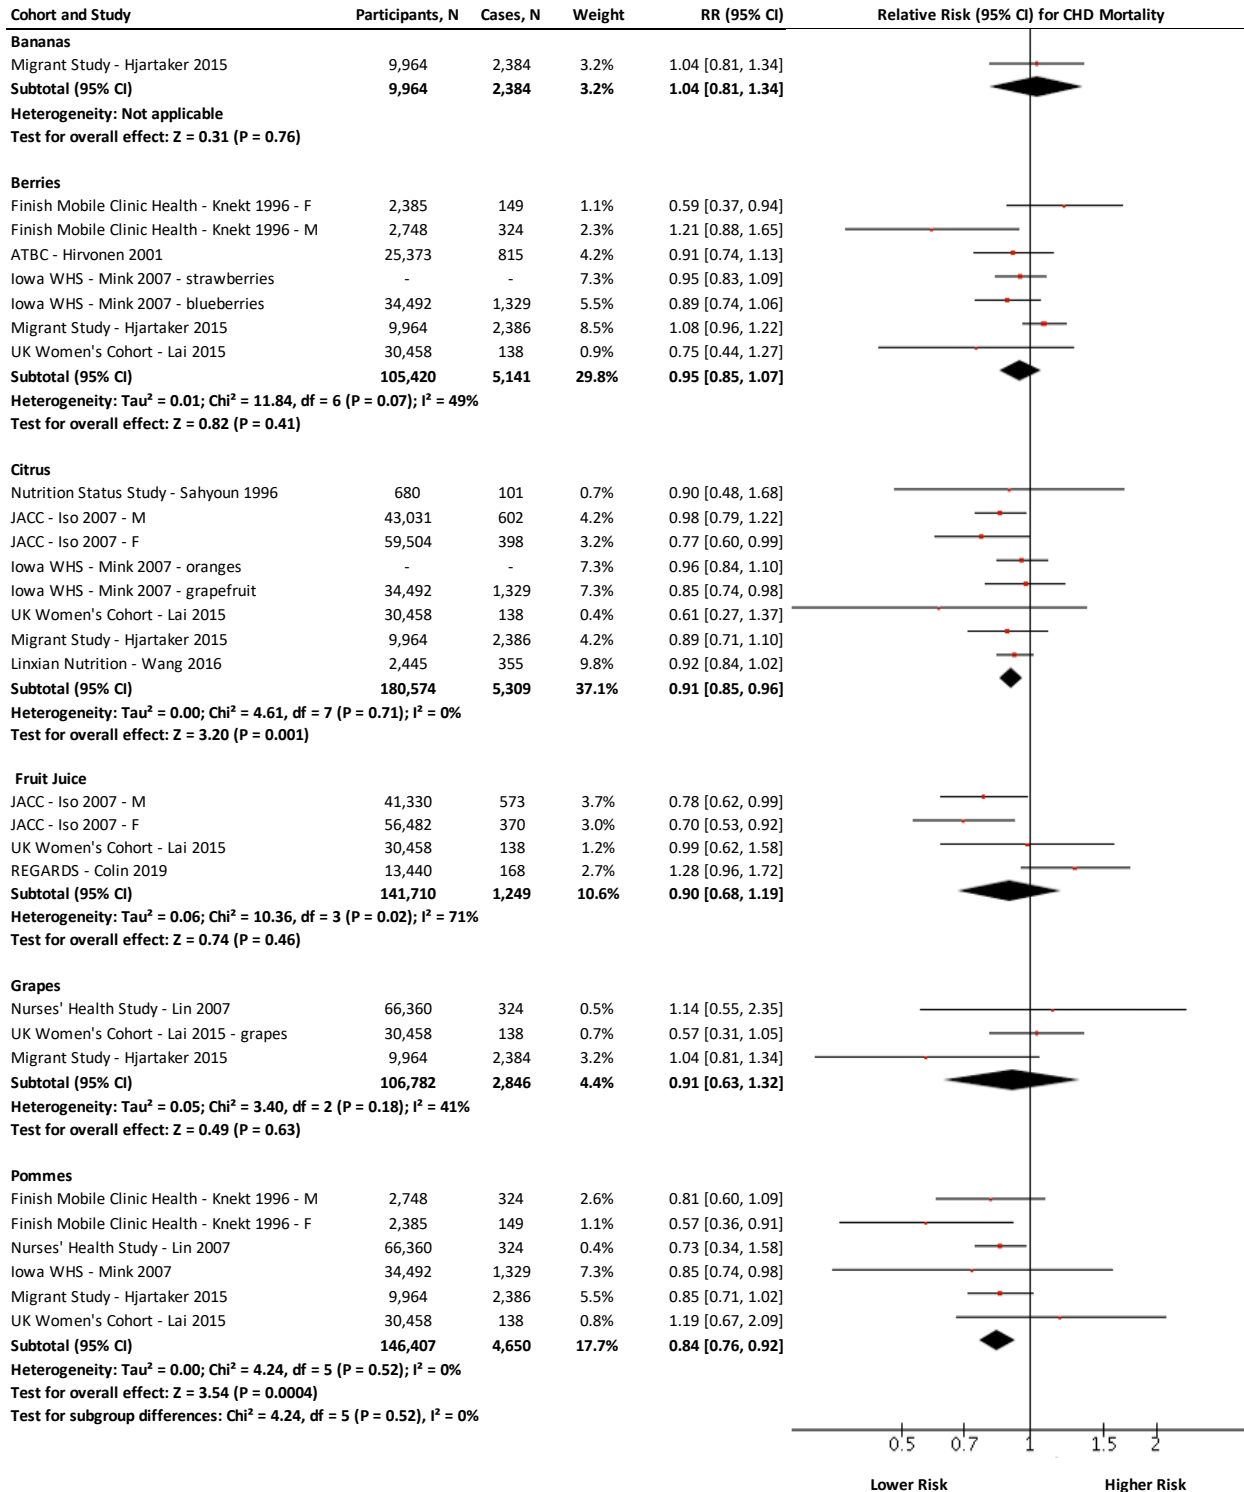

**Figure S88.** Relation between sources of fruit and CHD mortality (highest vs. lowest level of intake). All results are presented as relative risk (RR) with 95% confidence intervals (95% CI). Pooled risk estimate is represented by the black diamond using (A) fixed effects and (B) random effects models. Inter-study heterogeneity was assessed using the Cochran Q statistic (Chi<sup>2</sup>) at a significance level of p<0.10, and quantified by I<sup>2</sup>, with values ≥ 50% indicating substantial heterogeneity.

## A. Fixed Effects

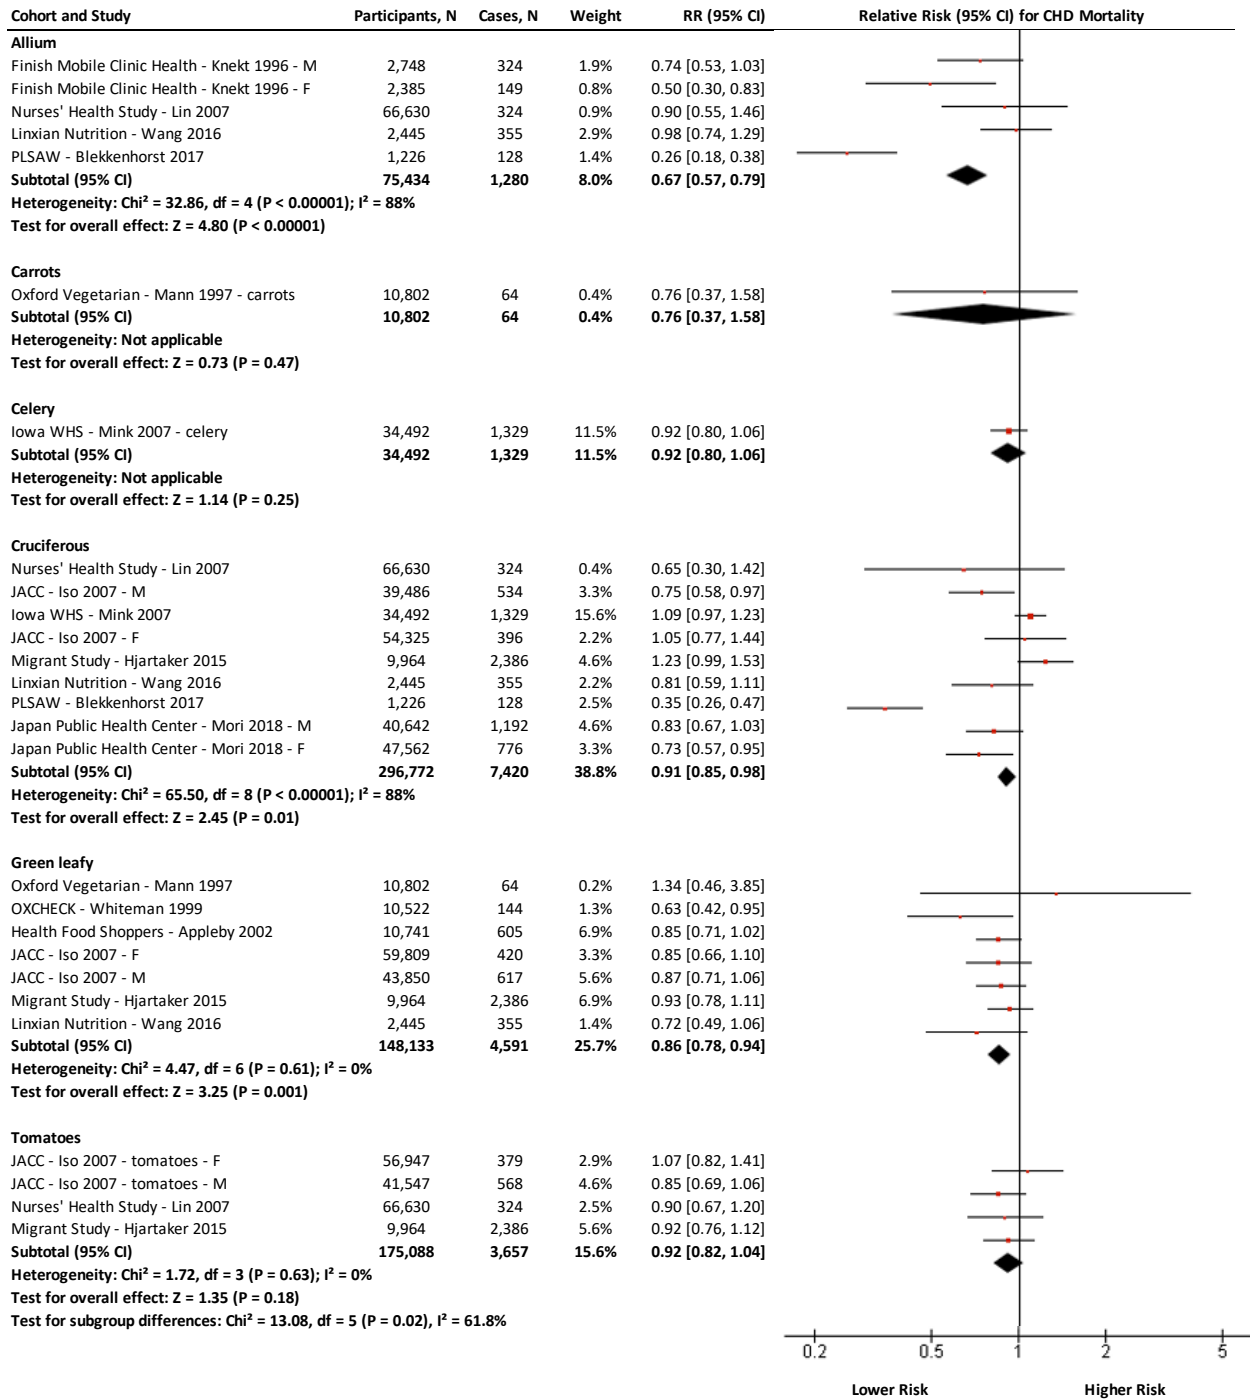

## B. Random Effects

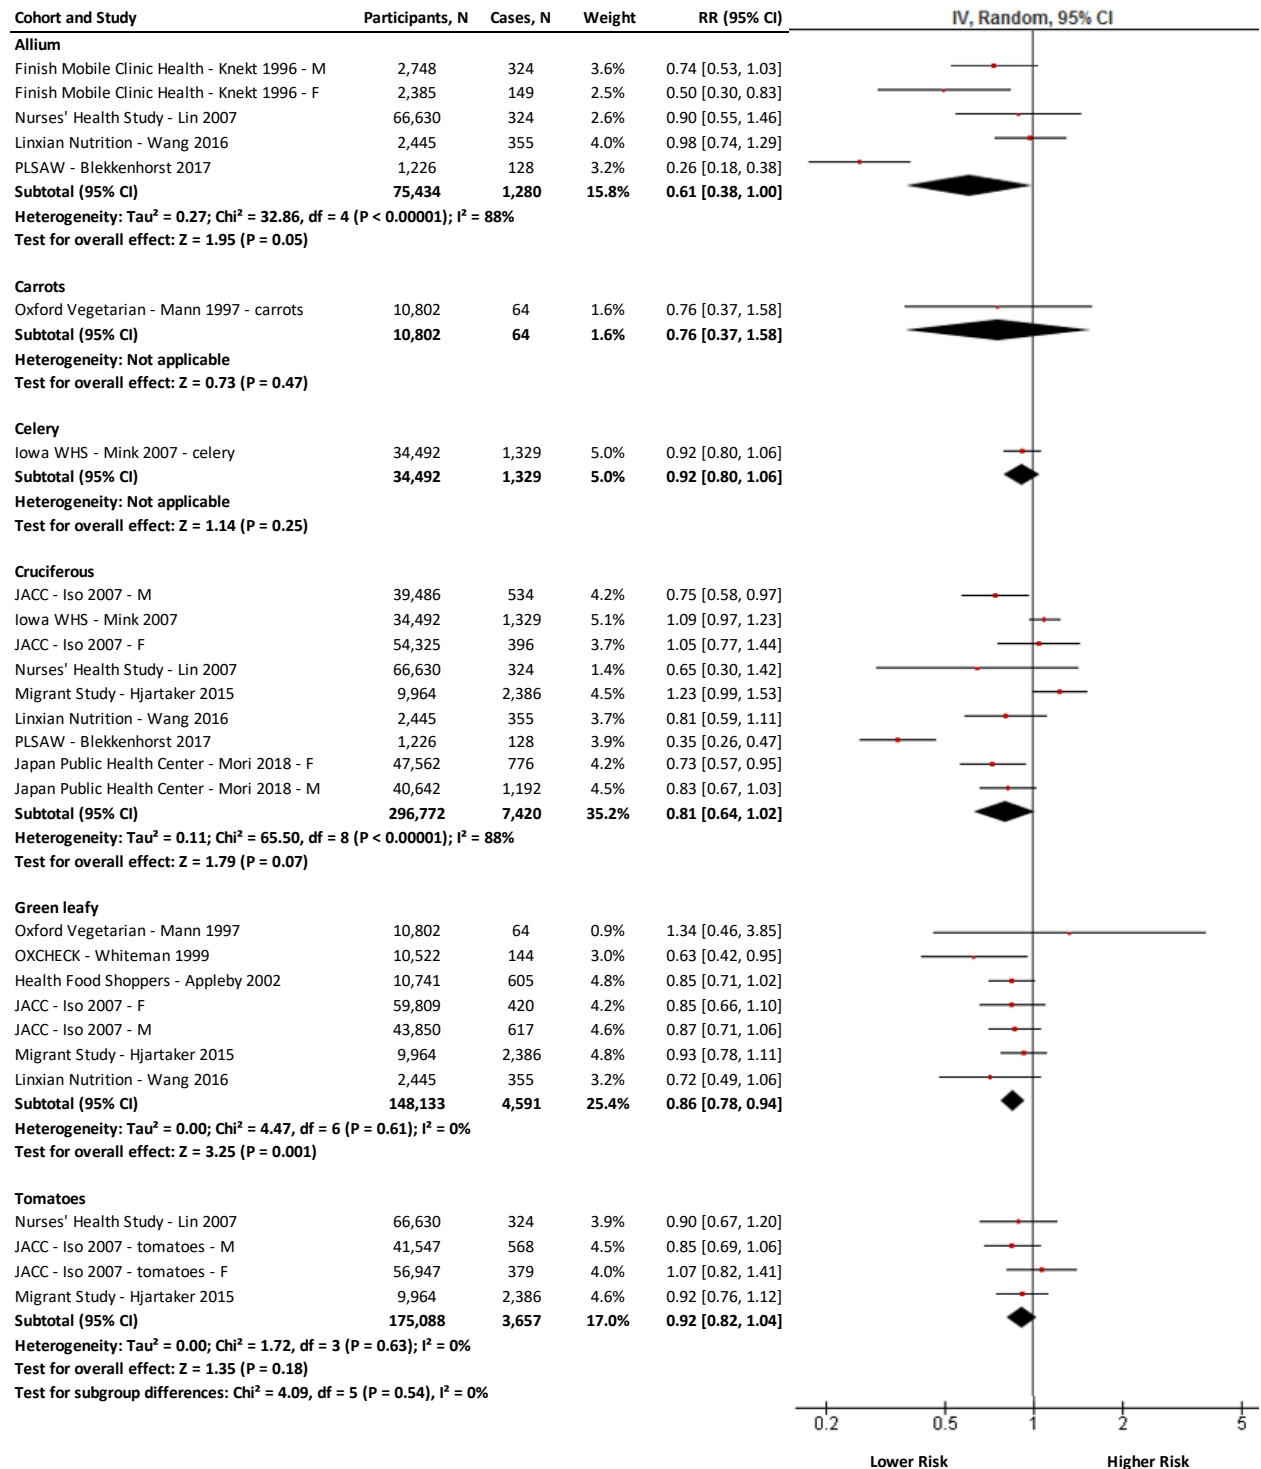

**Figure S89.** Relation between sources of vegetables and CHD mortality (highest vs. lowest level of intake). All results are presented as relative risk (RR) with 95% confidence intervals (95% CI). Pooled risk estimate is represented by the black diamond using (A) fixed effects and (B) random effects models. Inter-study heterogeneity was assessed using the Cochran Q statistic (Chi<sup>2</sup>) at a significance level of p<0.10, and quantified by I<sup>2</sup>, with values ≥ 50% indicating substantial heterogeneity.

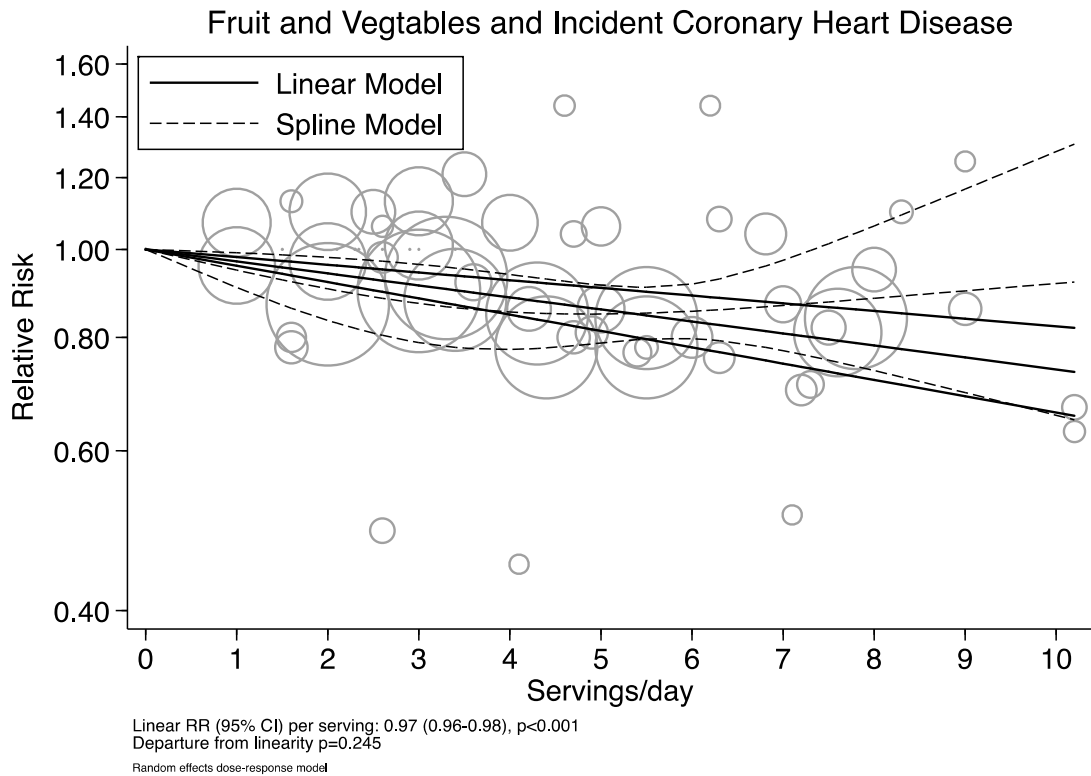

**Figure S90.** Linear and cubic-spline dose-response relation between increasing fruit and vegetable intake and incidence of coronary heart disease. Linear dose-response data was modeled using the Greenland and Longnecker<sup>23</sup> method to estimate the covariances of multivariable-adjusted relative risk. Cubic spline data were modeled with fixed-effects restricted cubic spline with 3 knots and using the Greenland and Longnecker<sup>23</sup> method to estimate the covariances of multivariable-adjusted relative risk. All data was kept on the original dose scale. The fitted trend for each model is represented by a central line (solid lines for linear model; dashed lines for cubic spline model) with 95% confidence intervals represented by the outer lines. Individual observations are represented by the circles, with the weight of the study in the overall analysis represented by the size of the circles.

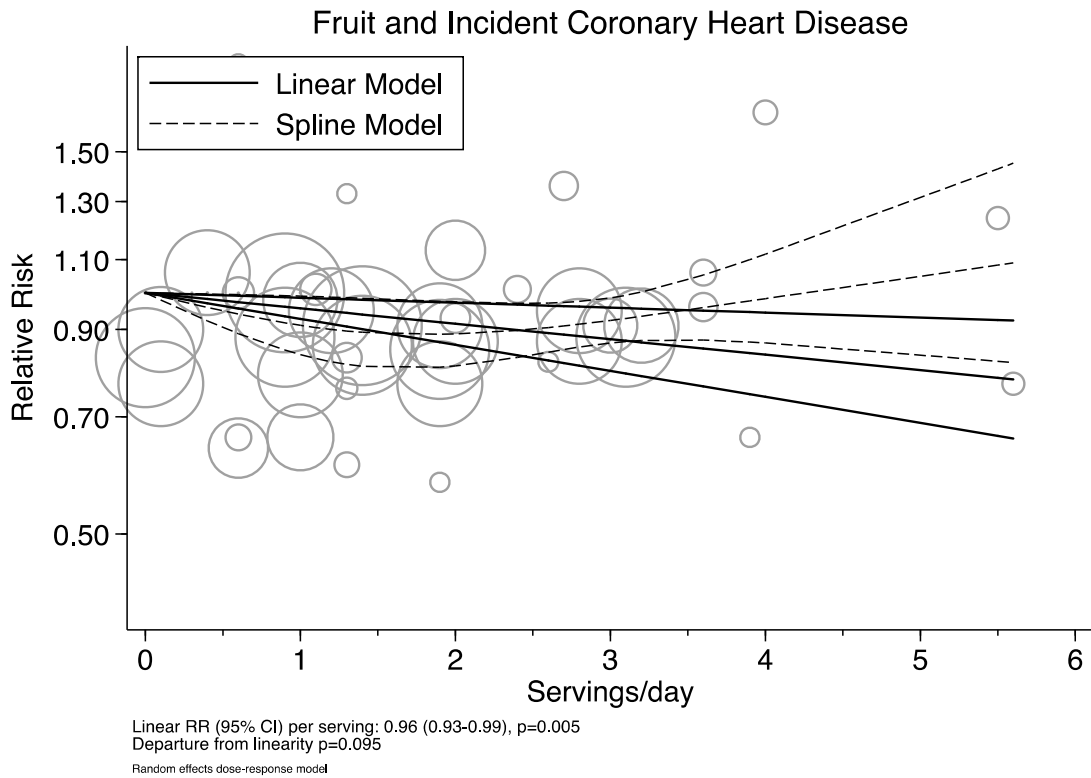

**Figure S91.** Linear and cubic-spline dose-response relation between increasing fruit intake and incidence of coronary heart disease. Linear dose-response data was modeled using the Greenland and Longnecker<sup>23</sup> method to estimate the covariances of multivariable-adjusted relative risk. Cubic spline data were modeled with fixed-effects restricted cubic spline with 3 knots and using the Greenland and Longnecker<sup>23</sup> method to estimate the covariances of multivariable-adjusted relative risk. All data was kept on the original dose scale. The fitted trend for each model is represented by a central line (solid lines for linear model; dashed lines for cubic spline model) with 95% confidence intervals represented by the outer lines. Individual observations are represented by the circles, with the weight of the study in the overall analysis represented by the size of the circles.



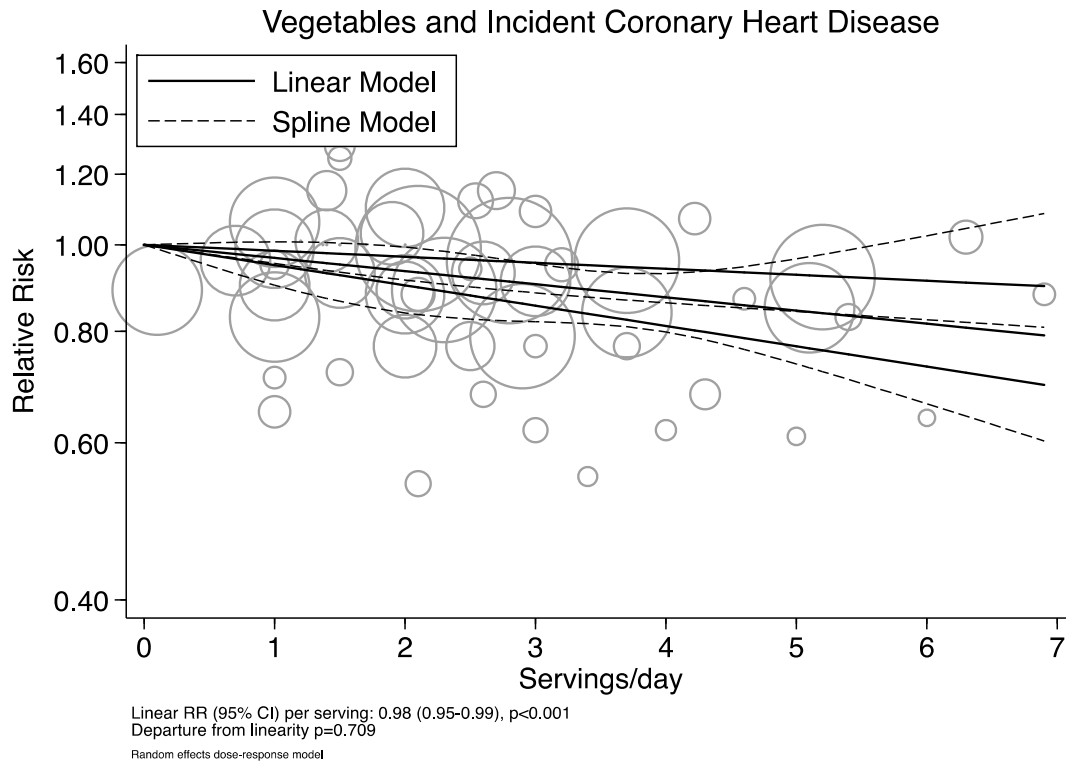

**Figure S92.** Linear and cubic-spline dose-response relation between increasing intake of vegetables and incidence of coronary heart disease. Linear dose-response data was modeled using the Greenland and Longnecker<sup>23</sup> method to estimate the covariances of multivariable-adjusted relative risk. Cubic spline data were modeled with fixed-effects restricted cubic spline with 3 knots and using the Greenland and Longnecker<sup>23</sup> method to estimate the covariances of multivariable-adjusted relative risk. All data was kept on the original dose scale. The fitted trend for each model is represented by a central line (solid lines for linear model; dashed lines for cubic spline model) with 95% confidence intervals represented by the outer lines. Individual observations are represented by the circles, with the weight of the study in the overall analysis represented by the size of the circles.

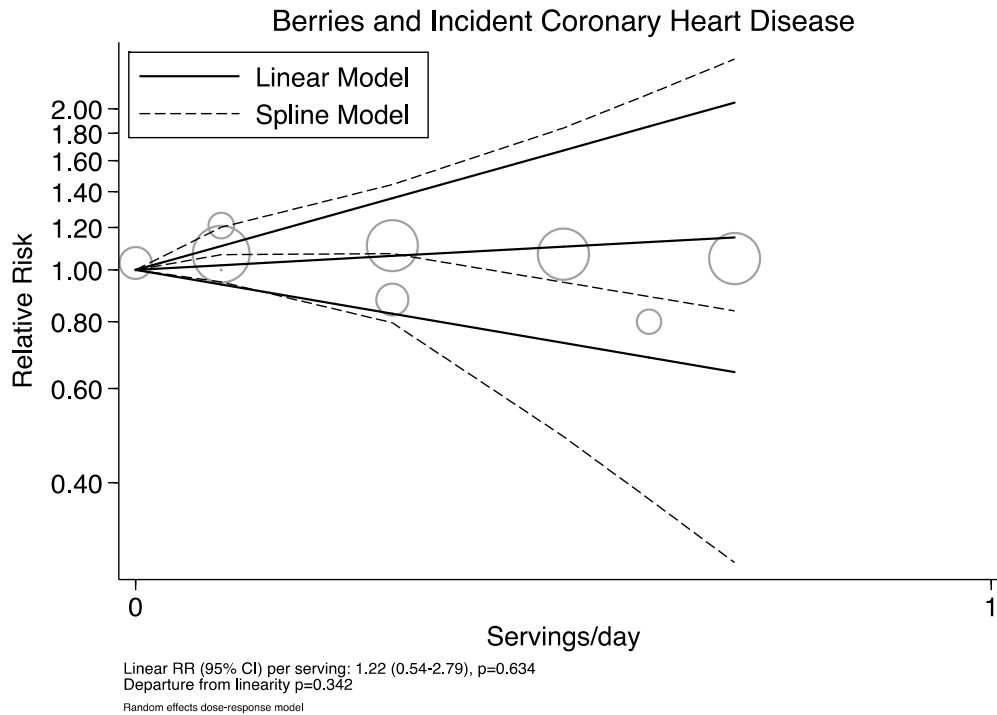

**Figure S93.** Linear and cubic-spline dose-response relation between increasing berries intake and incidence of coronary heart disease. Linear dose-response data was modeled using the Greenland and Longnecker<sup>23</sup> method to estimate the covariances of multivariable-adjusted relative risk. Cubic spline data were modeled with fixed-effects restricted cubic spline with 3 knots and using the Greenland and Longnecker<sup>23</sup> method to estimate the covariances of multivariable-adjusted relative risk. All data was kept on the original dose scale. The fitted trend for each model is represented by a central line (solid lines for linear model; dashed lines for cubic spline model) with 95% confidence intervals represented by the outer lines. Individual observations are represented by the circles, with the weight of the study in the overall analysis represented by the size of the circles.

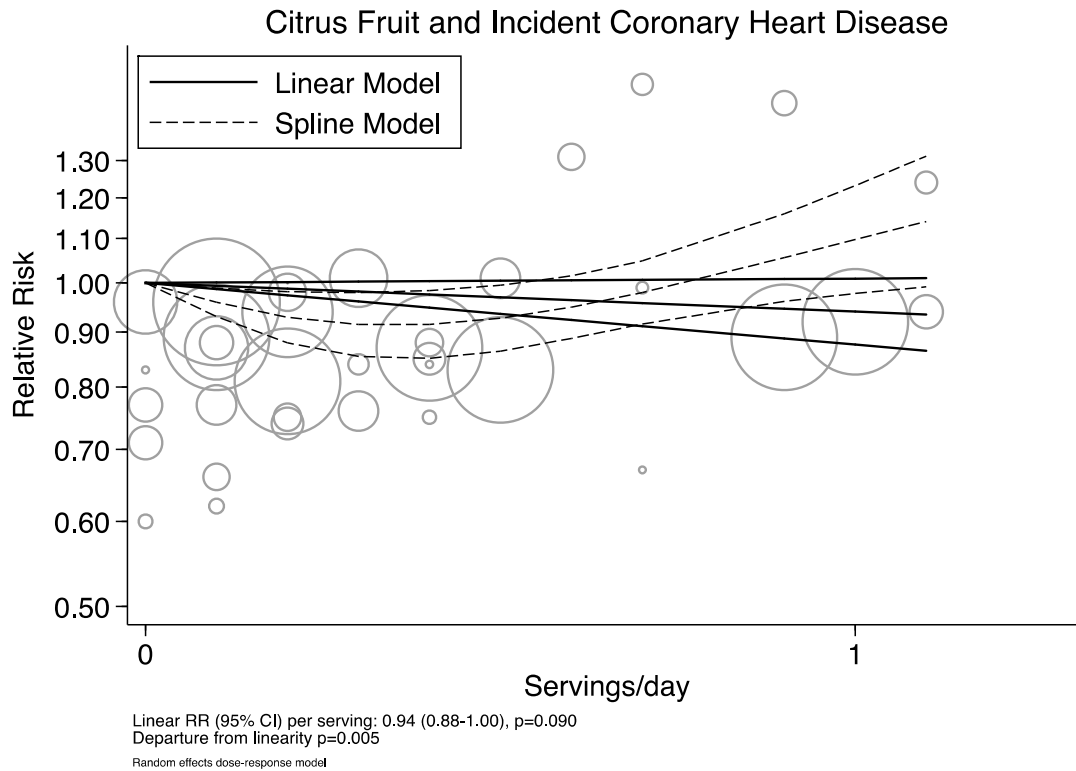

**Figure S94.** Linear and cubic-spline dose-response relation between increasing citrus fruit intake and incidence of coronary heart disease. Linear dose-response data was modeled using the Greenland and Longnecker<sup>23</sup> method to estimate the covariances of multivariable-adjusted relative risk. Cubic spline data were modeled with fixed-effects restricted cubic spline with 3 knots and using the Greenland and Longnecker<sup>23</sup> method to estimate the covariances of multivariable-adjusted relative risk. All data was kept on the original dose scale. The fitted trend for each model is represented by a central line (solid lines for linear model; dashed lines for cubic spline model) with 95% confidence intervals represented by the outer lines. Individual observations are represented by the circles, with the weight of the study in the overall analysis represented by the size of the circles.

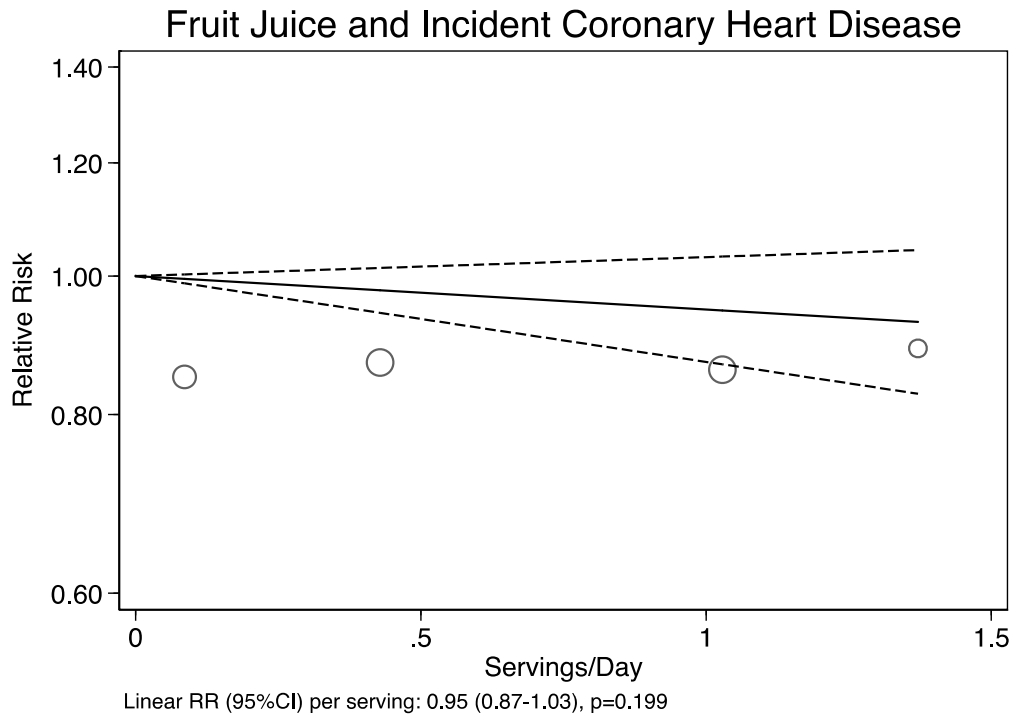

**Figure S95.** Linear and cubic-spline dose-response relation between increasing fruit juice intake and incidence of coronary heart disease. Linear dose-response data was modeled using the Greenland and Longnecker<sup>23</sup> method to estimate the covariances of multivariable-adjusted relative risk. Cubic spline data were modeled with fixed-effects restricted cubic spline with 3 knots and using the Greenland and Longnecker<sup>23</sup> method to estimate the covariances of multivariable-adjusted relative risk. All data was kept on the original dose scale. The fitted trend for each model is represented by a central line (solid lines for linear model; dashed lines for cubic spline model) with 95% confidence intervals represented by the outer lines. Individual observations are represented by the circles, with the weight of the study in the overall analysis represented by the size of the circles.

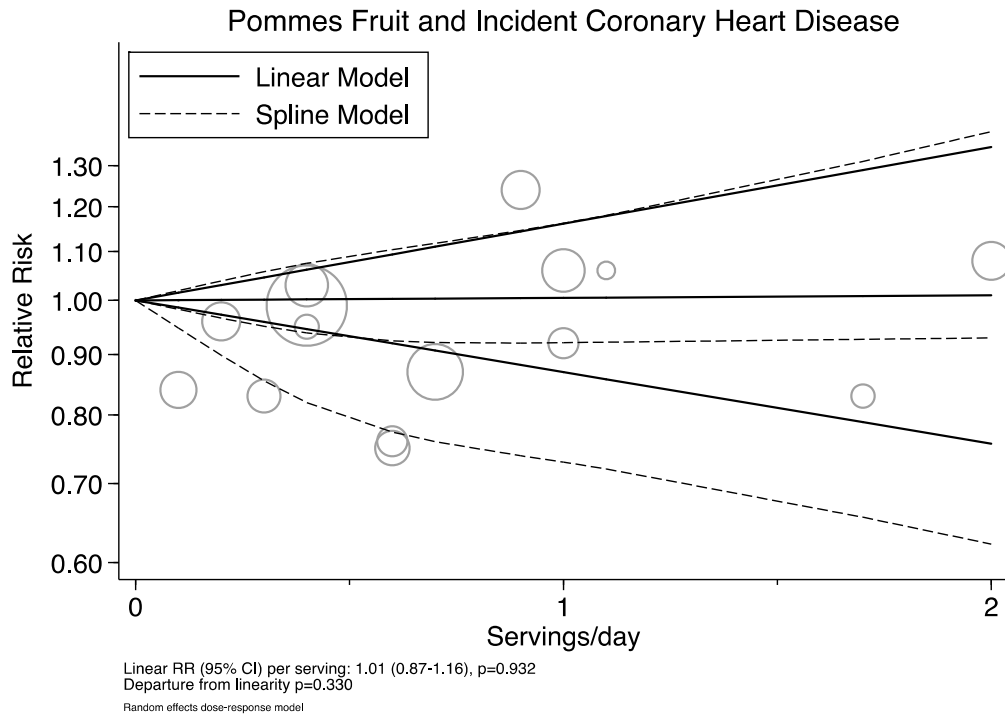

**Figure S96.** Linear and cubic-spline dose-response relation between increasing pommes intake and incidence of coronary heart disease. Linear dose-response data was modeled using the Greenland and Longnecker<sup>23</sup> method to estimate the covariances of multivariable-adjusted relative risk. Cubic spline data were modeled with fixed-effects restricted cubic spline with 3 knots and using the Greenland and Longnecker<sup>23</sup> method to estimate the covariances of multivariable-adjusted relative risk. All data was kept on the original dose scale. The fitted trend for each model is represented by a central line (solid lines for linear model; dashed lines for cubic spline model) with 95% confidence intervals represented by the outer lines. Individual observations are represented by the circles, with the weight of the study in the overall analysis represented by the size of the circles.

### Watermelon and Incident Coronary Heart Disease

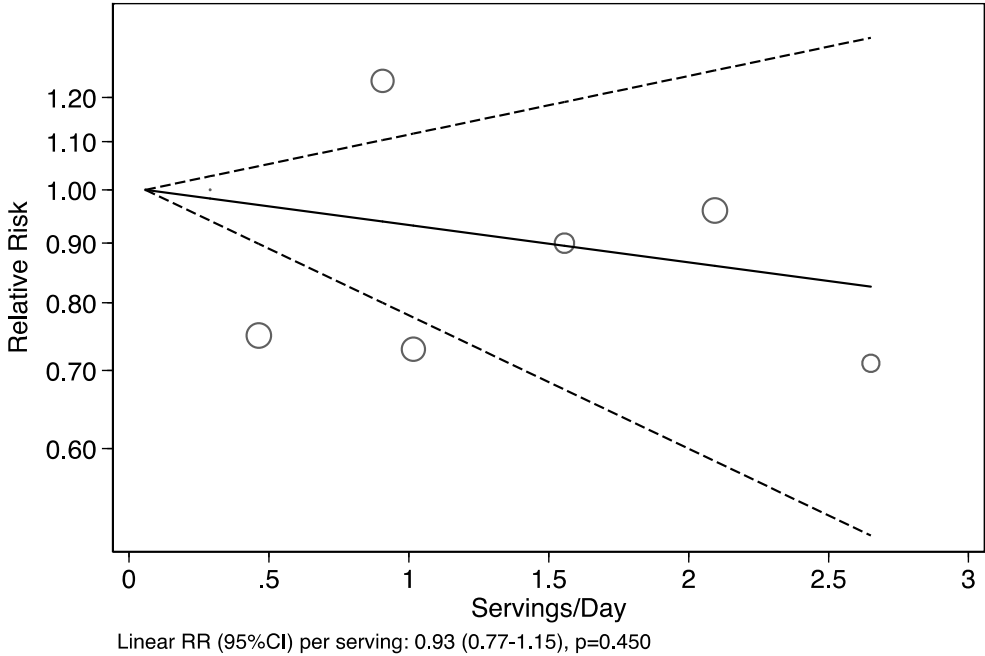

**Figure S97.** Linear dose-response relation between increasing watermelon intake and cardiovascular disease mortality. Linear dose-response data was modeled using the Greenland and Longnecker<sup>23</sup> method to estimate the covariances of multivariable-adjusted relative risk, with kept on the original dose scale. Dashed lines represent the pointwise 95% confidence intervals for the fitted linear trend represented by a solid line. Individual observations are represented by the circles, with the weight of the study in the overall analysis represented by the size of the circles.

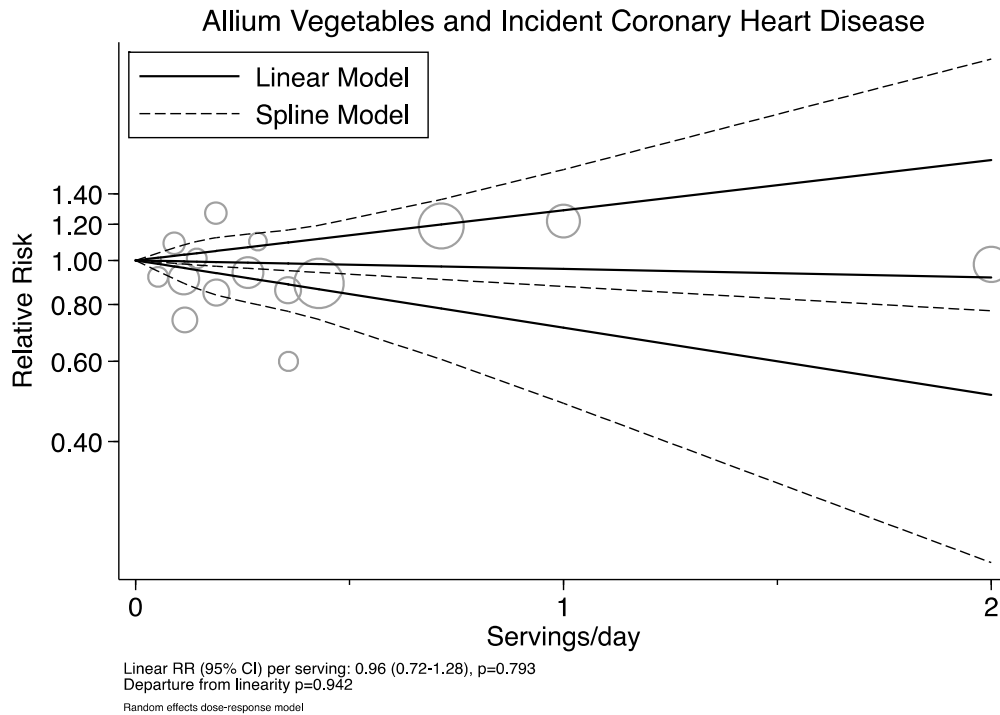

**Figure S98.** Linear and cubic-spline dose-response relation between increasing intake of allium vegetables and incidence of coronary heart disease. Linear dose-response data was modeled using the Greenland and Longnecker<sup>23</sup> method to estimate the covariances of multivariable-adjusted relative risk. Cubic spline data were modeled with fixed-effects restricted cubic spline with 3 knots and using the Greenland and Longnecker<sup>23</sup> method to estimate the covariances of multivariable-adjusted relative risk. All data was kept on the original dose scale. The fitted trend for each model is represented by a central line (solid lines for linear model; dashed lines for cubic spline model) with 95% confidence intervals represented by the outer lines. Individual observations are represented by the circles, with the weight of the study in the overall analysis represented by the size of the circles.

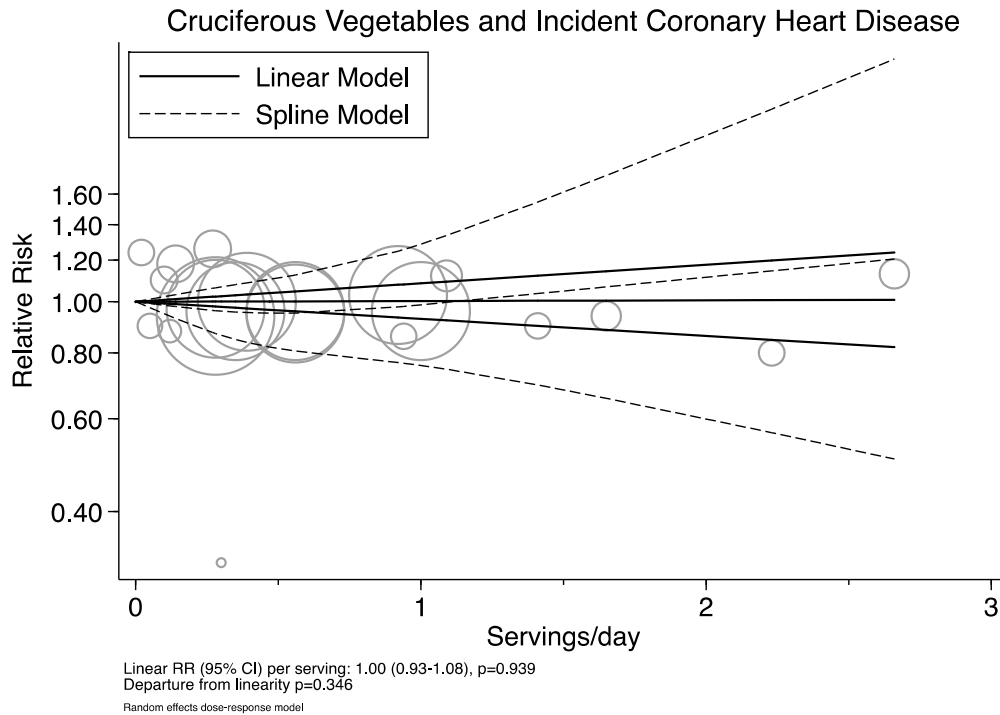

**Figure S99.** Linear and cubic-spline dose-response relation between increasing intake of cruciferous vegetables and coronary heart disease mortality. Linear dose-response data was modeled using the Greenland and Longnecker<sup>23</sup> method to estimate the covariances of multivariable-adjusted relative risk. Cubic spline data were modeled with fixed-effects restricted cubic spline with 3 knots and using the Greenland and Longnecker<sup>23</sup> method to estimate the covariances of multivariable-adjusted relative risk. All data was kept on the original dose scale. The fitted trend for each model is represented by a central line (solid lines for linear model; dashed lines for cubic spline model) with 95% confidence intervals represented by the outer lines. Individual observations are represented by the circles, with the weight of the study in the overall analysis represented by the size of the circles.



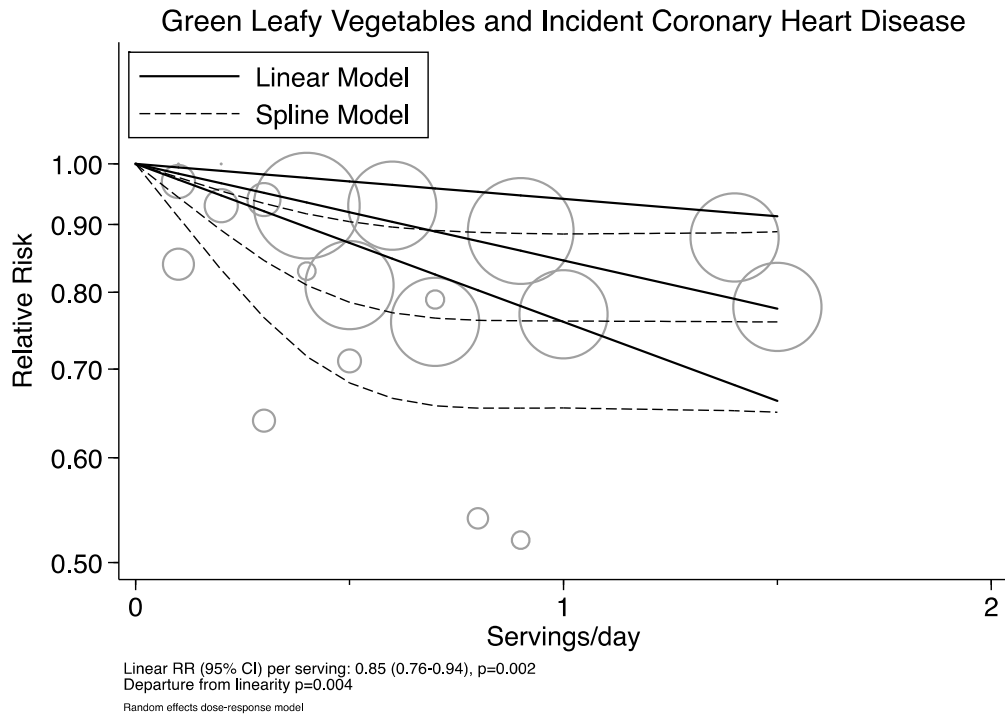

**Figure S100.** Linear and cubic-spline dose-response relation between increasing intake of green leafy vegetables and incidence of coronary heart disease. Linear dose-response data was modeled using the Greenland and Longnecker<sup>23</sup> method to estimate the covariances of multivariable-adjusted relative risk. Cubic spline data were modeled with fixed-effects restricted cubic spline with 3 knots and using the Greenland and Longnecker<sup>23</sup> method to estimate the covariances of multivariable-adjusted relative risk. All data was kept on the original dose scale. The fitted trend for each model is represented by a central line (solid lines for linear model; dashed lines for cubic spline model) with 95% confidence intervals represented by the outer lines. Individual observations are represented by the circles, with the weight of the study in the overall analysis represented by the size of the circles.

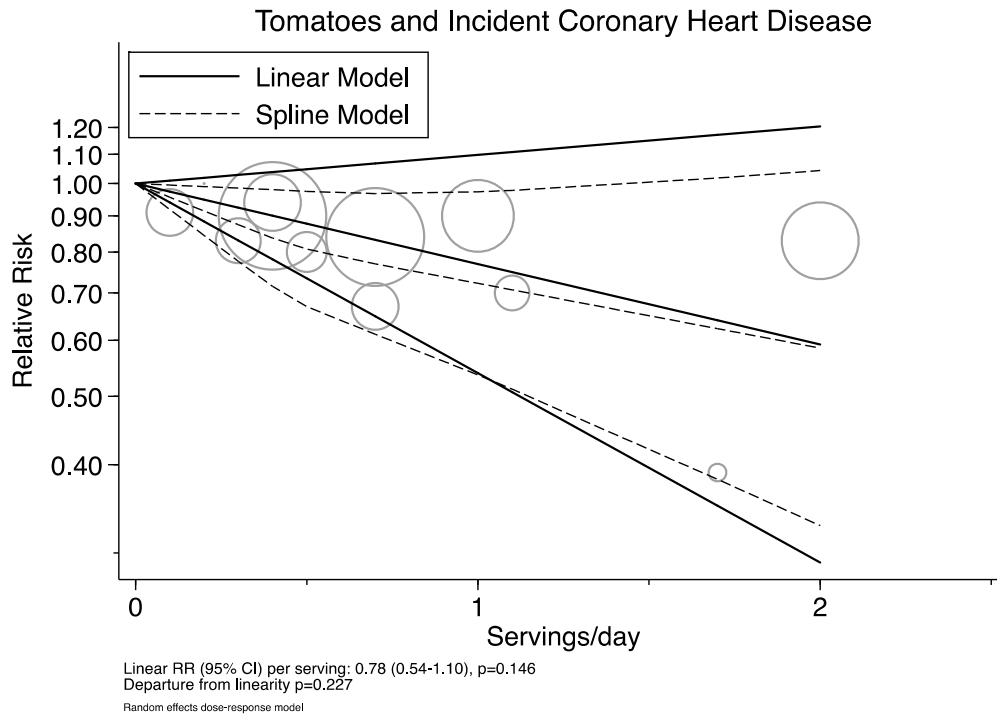

**Figure S101.** Linear and cubic-spline dose-response relation between increasing tomato intake and incidence of coronary heart disease. Linear dose-response data was modeled using the Greenland and Longnecker<sup>23</sup> method to estimate the covariances of multivariable-adjusted relative risk. Cubic spline data were modeled with fixed-effects restricted cubic spline with 3 knots and using the Greenland and Longnecker<sup>23</sup> method to estimate the covariances of multivariable-adjusted relative risk. All data was kept on the original dose scale. The fitted trend for each model is represented by a central line (solid lines for linear model; dashed lines for cubic spline model) with 95% confidence intervals represented by the outer lines. Individual observations are represented by the circles, with the weight of the study in the overall analysis represented by the size of the circles.

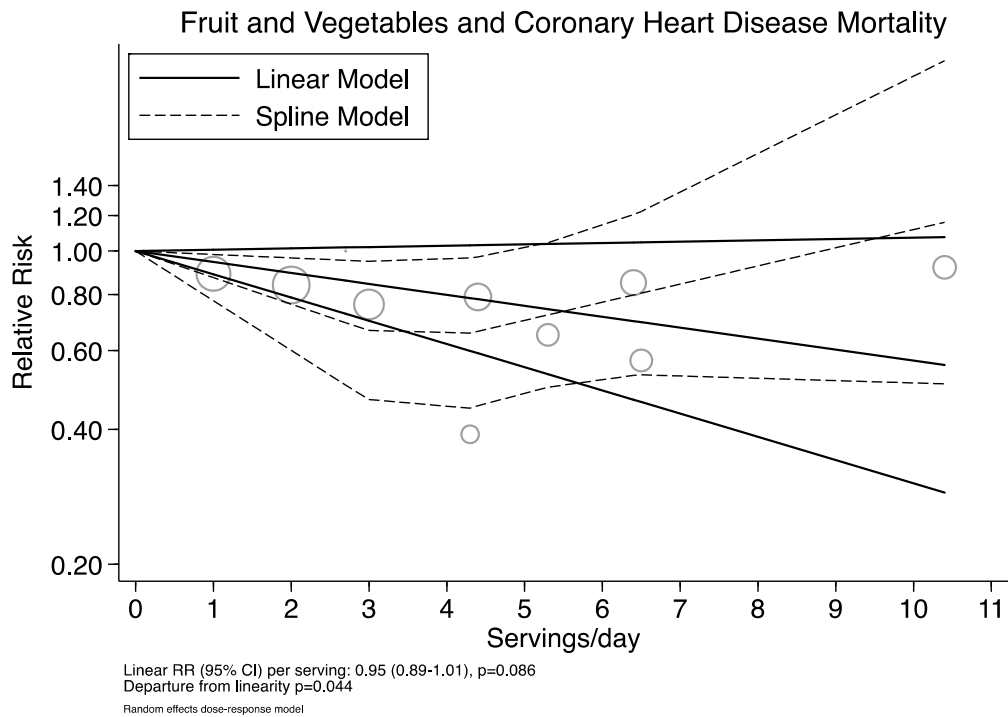

**Figure S102.** Linear and cubic-spline dose-response relation between increasing fruit and vegetable intake and coronary heart disease mortality. Linear dose-response data was modeled using the Greenland and Longnecker<sup>23</sup> method to estimate the covariances of multivariable-adjusted relative risk. Cubic spline data were modeled with fixed-effects restricted cubic spline with 3 knots and using the Greenland and Longnecker<sup>23</sup> method to estimate the covariances of multivariable-adjusted relative risk. All data was kept on the original dose scale. The fitted trend for each model is represented by a central line (solid lines for linear model; dashed lines for cubic spline model) with 95% confidence intervals represented by the outer lines. Individual observations are represented by the circles, with the weight of the study in the overall analysis represented by the size of the circles.

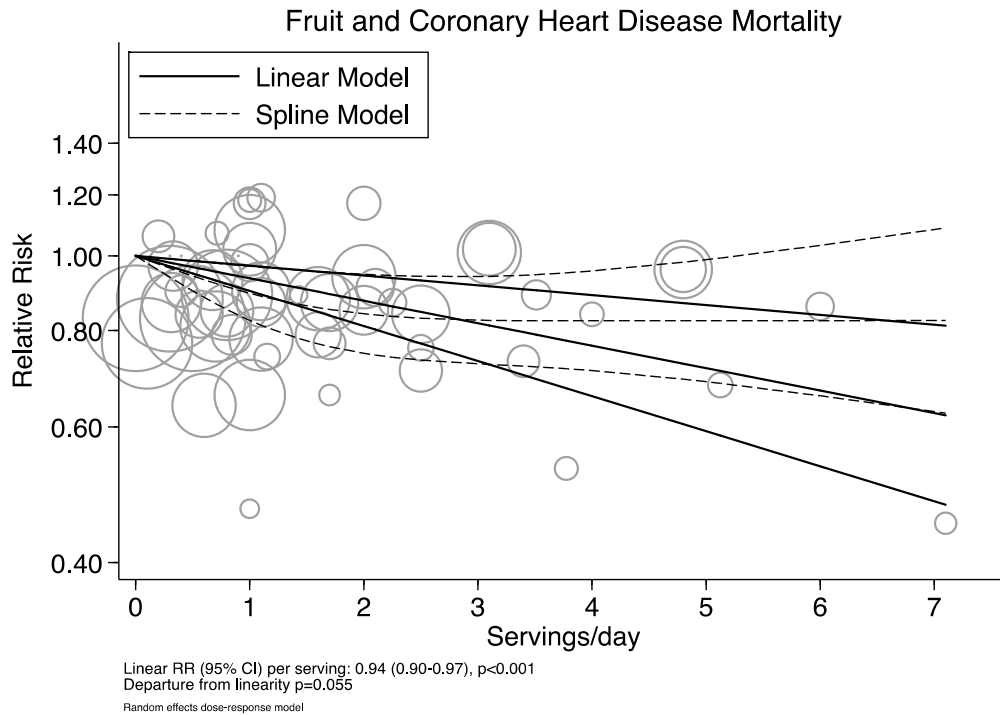

**Figure S103.** Linear and cubic-spline dose-response relation between increasing fruit intake and coronary heart disease mortality. Linear dose-response data was modeled using the Greenland and Longnecker<sup>23</sup> method to estimate the covariances of multivariable-adjusted relative risk. Cubic spline data were modeled with fixed-effects restricted cubic spline with 3 knots and using the Greenland and Longnecker<sup>23</sup> method to estimate the covariances of multivariable-adjusted relative risk. All data was kept on the original dose scale. The fitted trend for each model is represented by a central line (solid lines for linear model; dashed lines for cubic spline model) with 95% confidence intervals represented by the outer lines. Individual observations are represented by the circles, with the weight of the study in the overall analysis represented by the size of the circles.

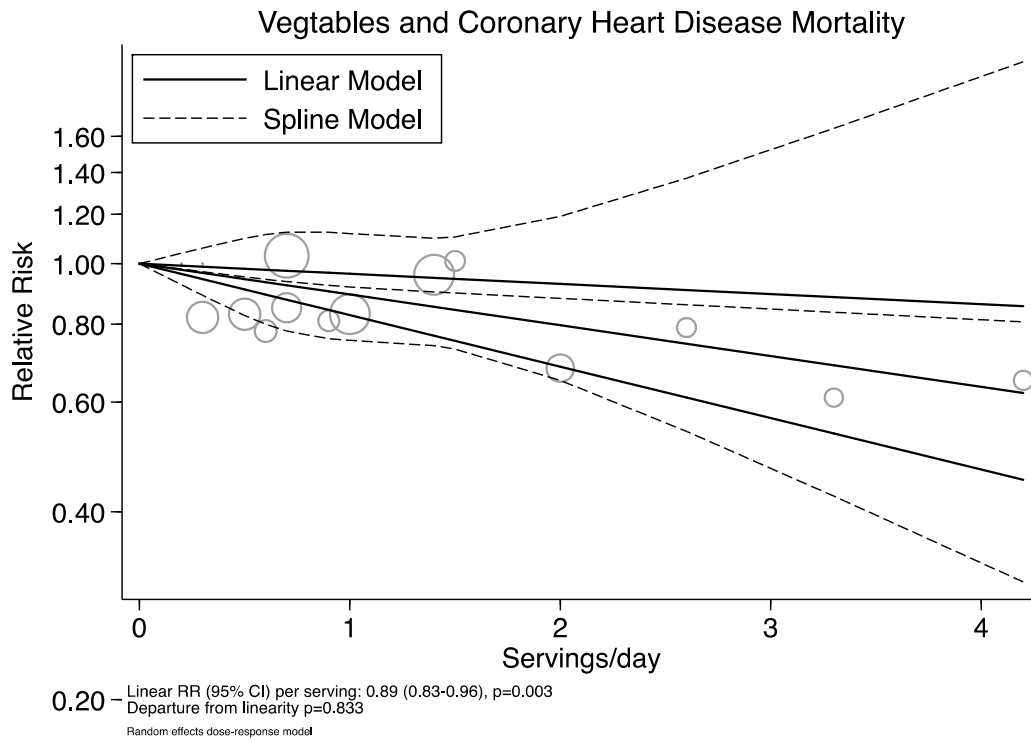

**Figure S104.** Linear and cubic-spline dose-response relation between increasing intake of vegetables and coronary heart disease mortality. Linear dose-response data was modeled using the Greenland and Longnecker<sup>23</sup> method to estimate the covariances of multivariable-adjusted relative risk. Cubic spline data were modeled with fixed-effects restricted cubic spline with 3 knots and using the Greenland and Longnecker<sup>23</sup> method to estimate the covariances of multivariable-adjusted relative risk. All data was kept on the original dose scale. The fitted trend for each model is represented by a central line (solid lines for linear model; dashed lines for cubic spline model) with 95% confidence intervals represented by the outer lines. Individual observations are represented by the circles, with the weight of the study in the overall analysis represented by the size of the circles.

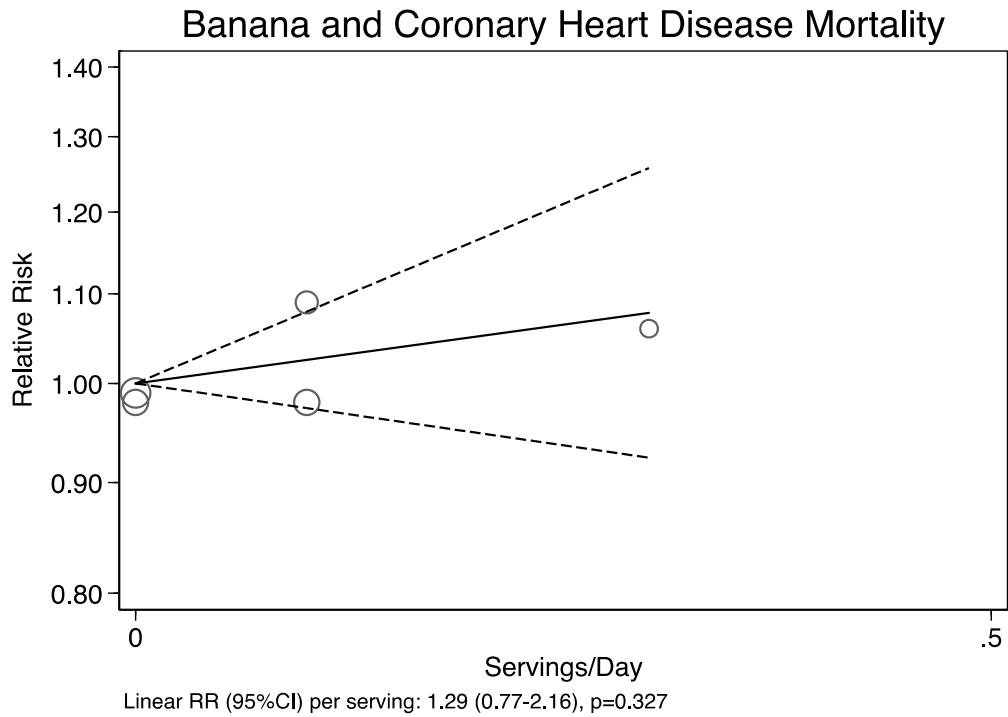

**Figure S105.** Linear dose-response relation between increasing banana intake and cardiovascular disease mortality. Linear dose-response data was modeled using the Greenland and Longnecker<sup>23</sup> method to estimate the covariances of multivariable-adjusted relative risk, with kept on the original dose scale. Dashed lines represent the pointwise 95% confidence intervals for the fitted linear trend represented by a solid line. Individual observations are represented by the circles, with the weight of the study in the overall analysis represented by the size of the circles.

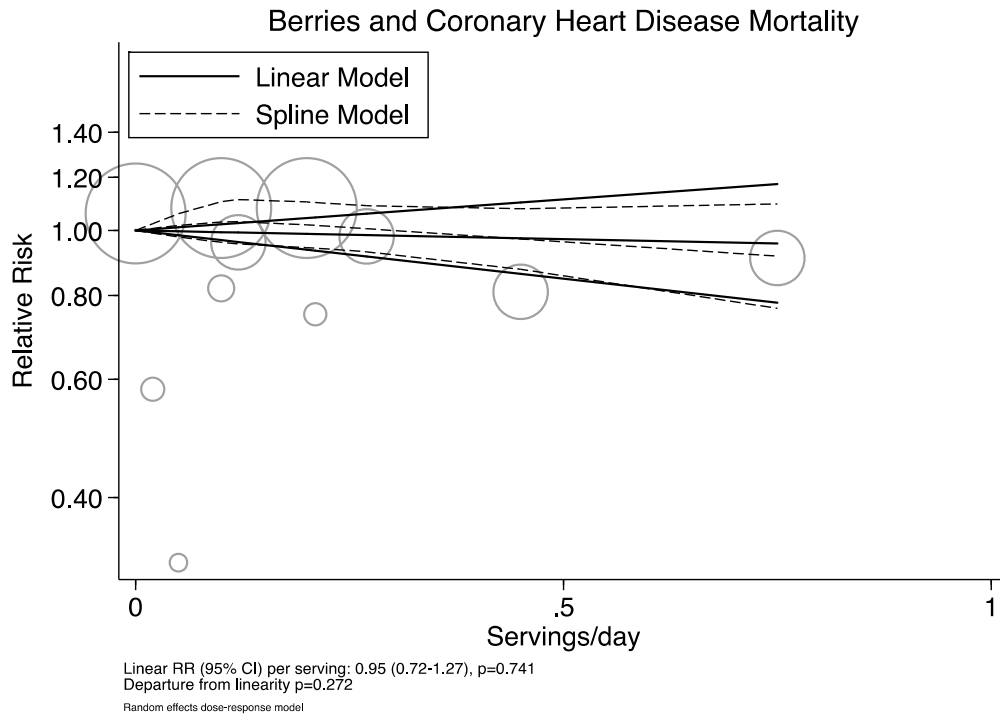

**Figure S106.** Linear dose-response relation between increasing berries intake and coronary heart disease mortality. Linear dose-response data was modeled using the Greenland and Longnecker<sup>23</sup> method to estimate the covariances of multivariable-adjusted relative risk, with kept on the original dose scale. Dashed lines represent the pointwise 95% confidence intervals for the fitted linear trend represented by a solid line. Individual observations are represented by the circles, with the weight of the study in the overall analysis represented by the size of the circles.

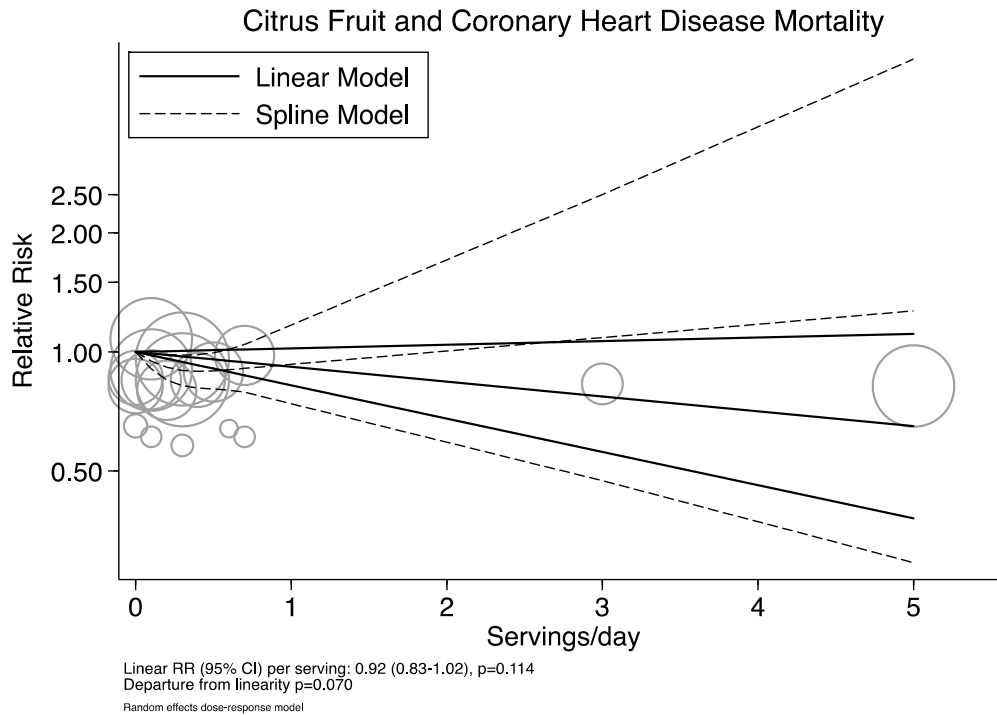

**Figure S107.** Linear and cubic-spline dose-response relation between increasing citrus fruit intake and coronary heart disease mortality. Linear dose-response data was modeled using the Greenland and Longnecker<sup>23</sup> method to estimate the covariances of multivariable-adjusted relative risk. Cubic spline data were modeled with fixed-effects restricted cubic spline with 3 knots and using the Greenland and Longnecker<sup>23</sup> method to estimate the covariances of multivariable-adjusted relative risk. All data was kept on the original dose scale. The fitted trend for each model is represented by a central line (solid lines for linear model; dashed lines for cubic spline model) with 95% confidence intervals represented by the outer lines. Individual observations are represented by the circles, with the weight of the study in the overall analysis represented by the size of the circles.



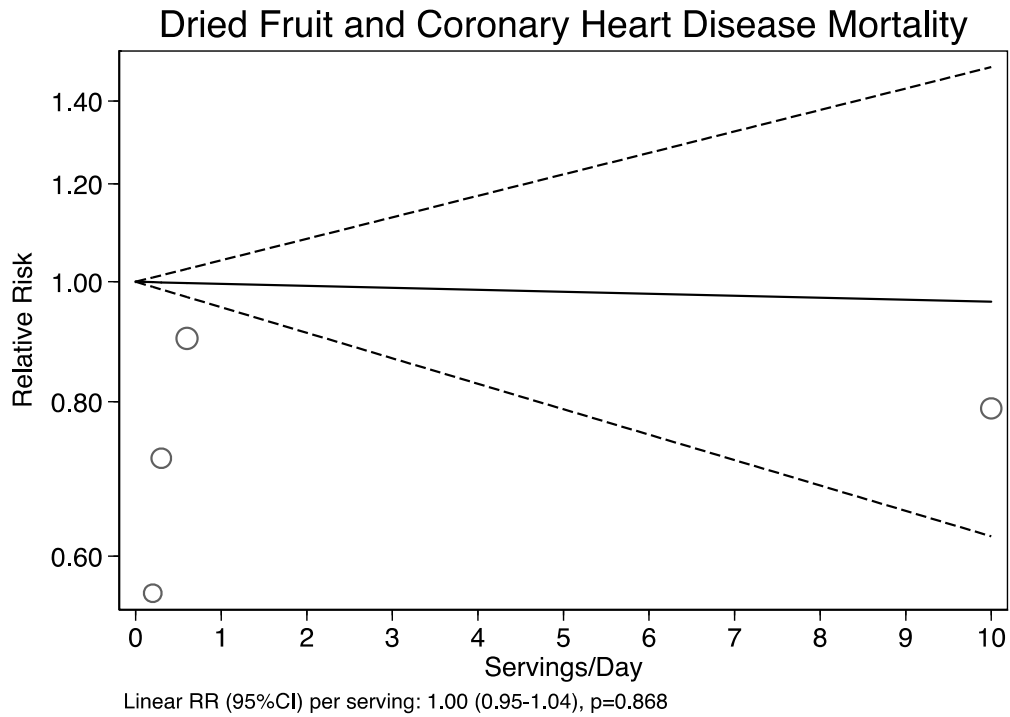

**Figure S108.** Linear and cubic-spline dose-response relation between increasing dried fruit intake and coronary heart disease mortality. Linear dose-response data was modeled using the Greenland and Longnecker<sup>23</sup> method to estimate the covariances of multivariable-adjusted relative risk. Cubic spline data were modeled with fixed-effects restricted cubic spline with 3 knots and using the Greenland and Longnecker<sup>23</sup> method to estimate the covariances of multivariable-adjusted relative risk. All data was kept on the original dose scale. The fitted trend for each model is represented by a central line (solid lines for linear model; dashed lines for cubic spline model) with 95% confidence intervals represented by the outer lines. Individual observations are represented by the circles, with the weight of the study in the overall analysis represented by the size of the circles.

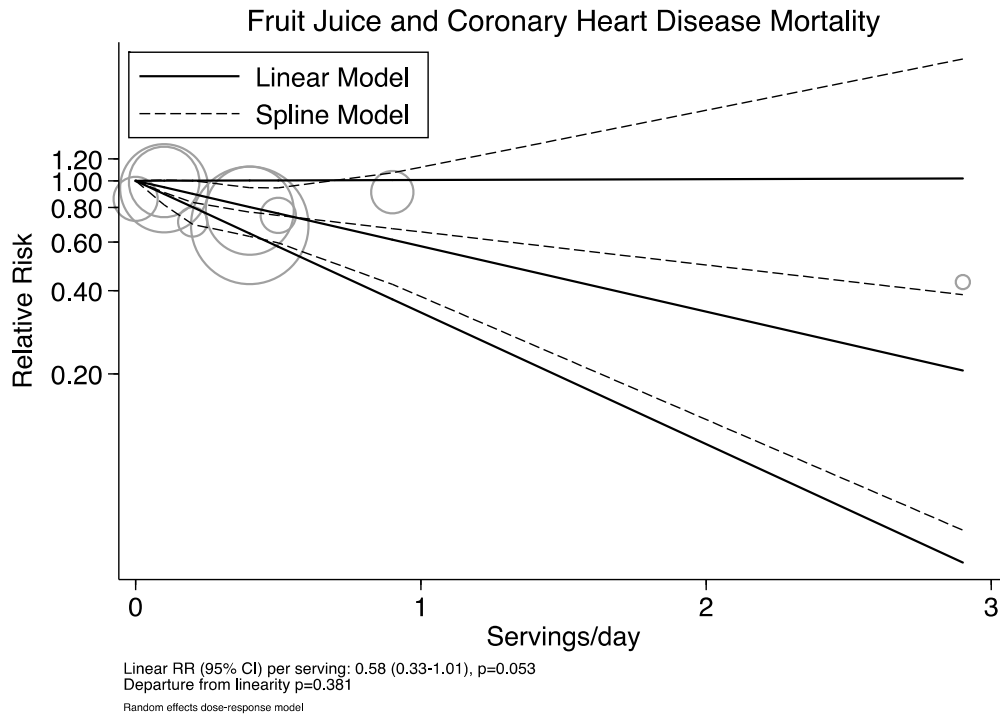

**Figure S109.** Linear and cubic-spline dose-response relation between increasing fruit juice intake and coronary heart disease mortality. Linear dose-response data was modeled using the Greenland and Longnecker<sup>23</sup> method to estimate the covariances of multivariable-adjusted relative risk. Cubic spline data were modeled with fixed-effects restricted cubic spline with 3 knots and using the Greenland and Longnecker<sup>23</sup> method to estimate the covariances of multivariable-adjusted relative risk. All data was kept on the original dose scale. The fitted trend for each model is represented by a central line (solid lines for linear model; dashed lines for cubic spline model) with 95% confidence intervals represented by the outer lines. Individual observations are represented by the circles, with the weight of the study in the overall analysis represented by the size of the circles.

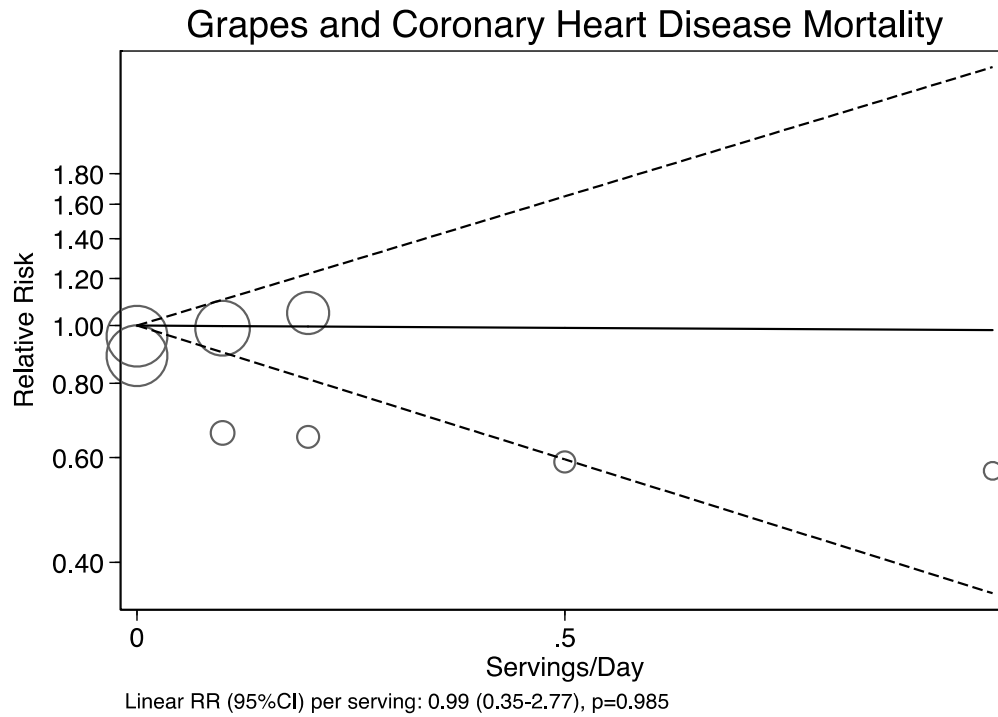

**Figure S110.** Linear dose-response relation between increasing grape intake and coronary heart disease mortality. Linear dose-response data was modeled using the Greenland and Longnecker<sup>23</sup> method to estimate the covariances of multivariable-adjusted relative risk, with kept on the original dose scale. Dashed lines represent the pointwise 95% confidence intervals for the fitted linear trend represented by a solid line. Individual observations are represented by the circles, with the weight of the study in the overall analysis represented by the size of the circles.

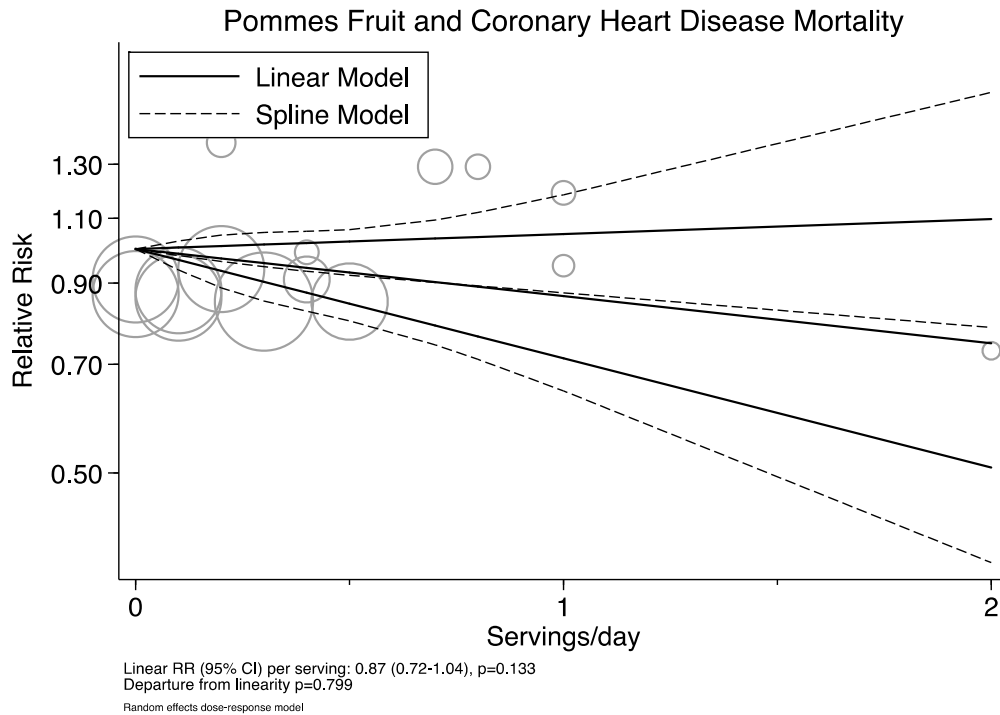

**Figure S111.** Linear and cubic-spline dose-response relation between increasing pommes intake and coronary heart disease mortality. Linear dose-response data was modeled using the Greenland and Longnecker<sup>23</sup> method to estimate the covariances of multivariable-adjusted relative risk. Cubic spline data were modeled with fixed-effects restricted cubic spline with 3 knots and using the Greenland and Longnecker<sup>23</sup> method to estimate the covariances of multivariable-adjusted relative risk. All data was kept on the original dose scale. The fitted trend for each model is represented by a central line (solid lines for linear model; dashed lines for cubic spline model) with 95% confidence intervals represented by the outer lines. Individual observations are represented by the circles, with the weight of the study in the overall analysis represented by the size of the circles.

### Allium Vegetables and Coronary Heart Disease Mortality

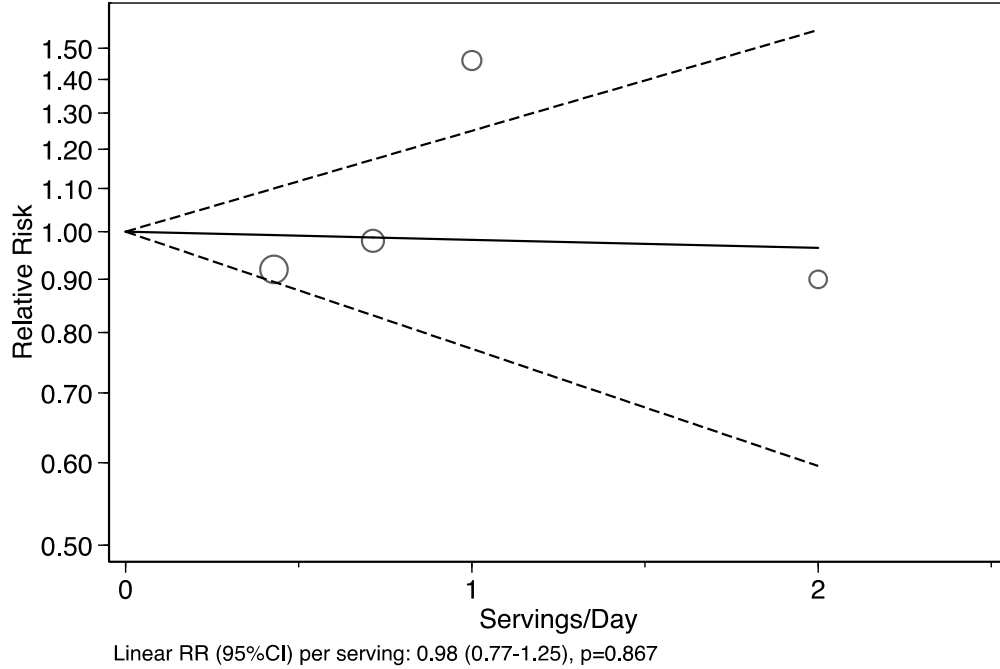

**Figure S112.** Linear dose-response relation between increasing intake of allium vegetables and coronary heart disease mortality. Linear dose-response data was modeled using the Greenland and Longnecker<sup>23</sup> method to estimate the covariances of multivariable-adjusted relative risk, with kept on the original dose scale. Dashed lines represent the pointwise 95% confidence intervals for the fitted linear trend represented by a solid line. Individual observations are represented by the circles, with the weight of the study in the overall analysis represented by the size of the circles.

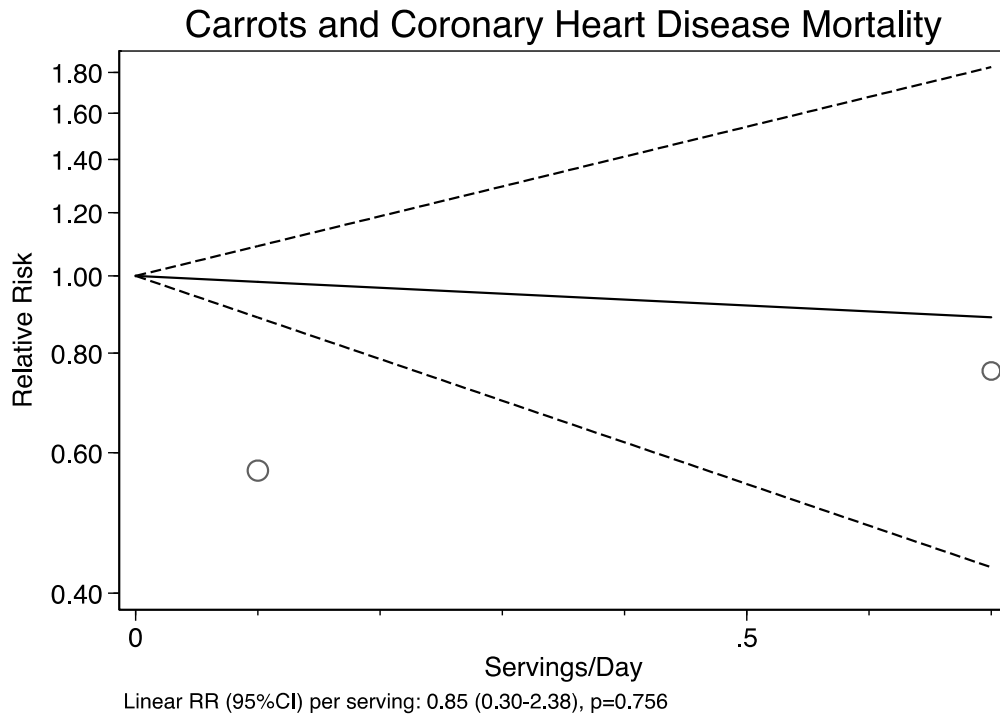

**Figure S113.** Linear dose-response relation between increasing intake of carrots and coronary heart disease mortality. Linear dose-response data was modeled using the Greenland and Longnecker<sup>23</sup> method to estimate the covariances of multivariable-adjusted relative risk, with kept on the original dose scale. Dashed lines represent the pointwise 95% confidence intervals for the fitted linear trend represented by a solid line. Individual observations are represented by the circles, with the weight of the study in the overall analysis represented by the size of the circles.

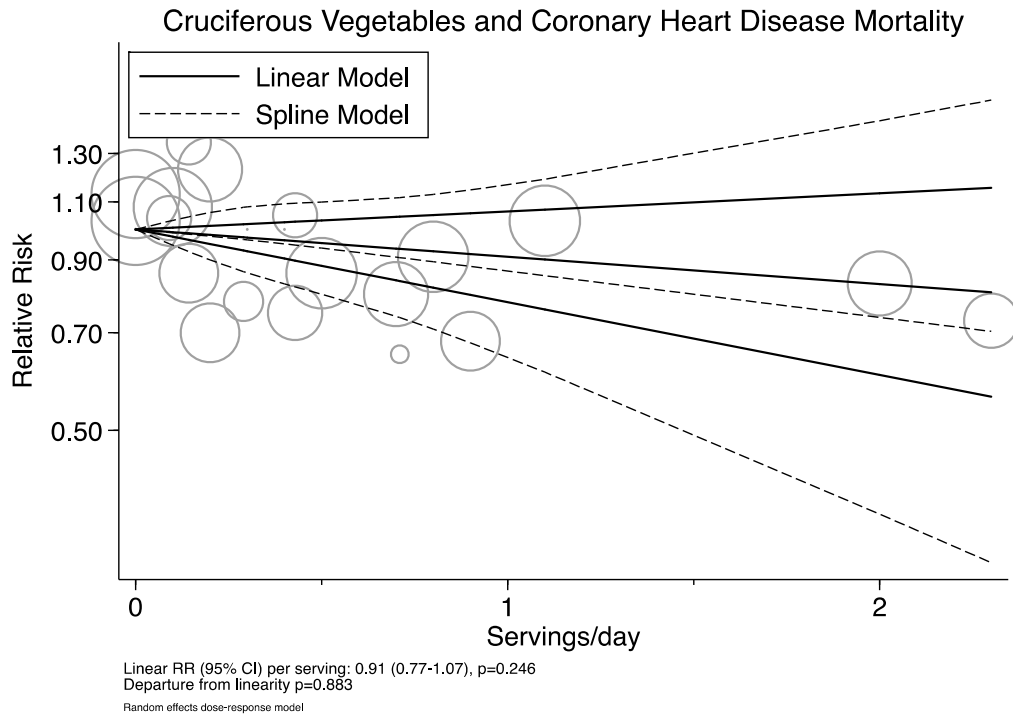

**Figure S114.** Linear and cubic-spline dose-response relation between increasing intake of cruciferous vegetables and coronary heart disease mortality. Linear dose-response data was modeled using the Greenland and Longnecker<sup>23</sup> method to estimate the covariances of multivariable-adjusted relative risk. Cubic spline data were modeled with fixed-effects restricted cubic spline with 3 knots and using the Greenland and Longnecker<sup>23</sup> method to estimate the covariances of multivariable-adjusted relative risk. All data was kept on the original dose scale. The fitted trend for each model is represented by a central line (solid lines for linear model; dashed lines for cubic spline model) with 95% confidence intervals represented by the outer lines. Individual observations are represented by the circles, with the weight of the study in the overall analysis represented by the size of the circles.

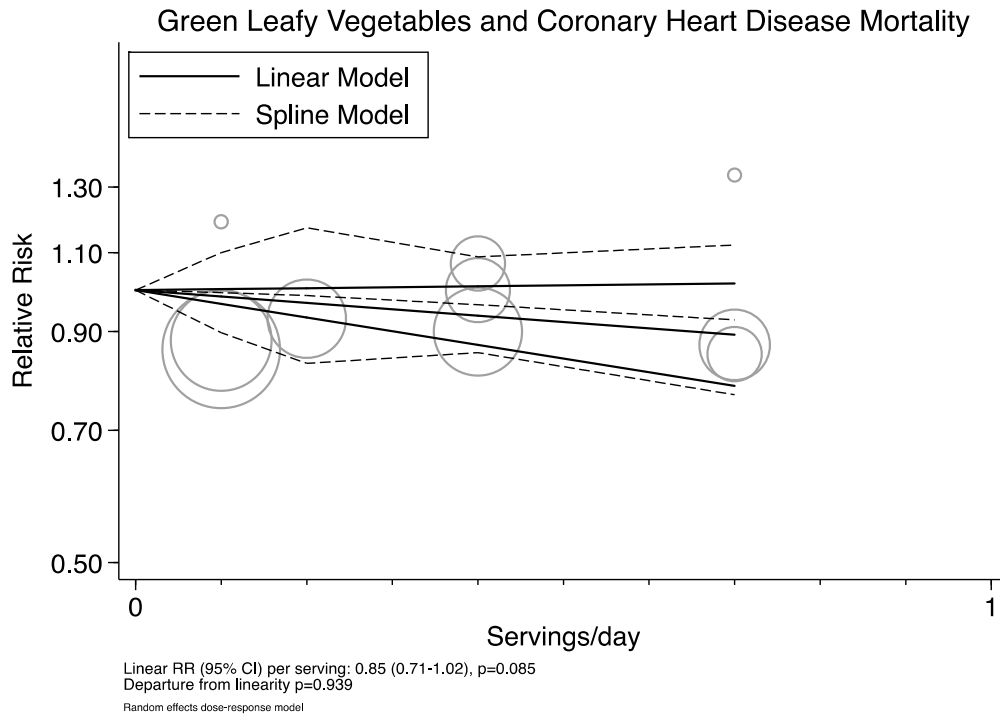

**Figure S115.** Linear dose-response relation between increasing intake of green leafy vegetables and coronary heart disease mortality. Linear dose-response data was modeled using the Greenland and Longnecker<sup>23</sup> method to estimate the covariances of multivariable-adjusted relative risk, with kept on the original dose scale. Dashed lines represent the pointwise 95% confidence intervals for the fitted linear trend represented by a solid line. Individual observations are represented by the circles, with the weight of the study in the overall analysis represented by the size of the circles.



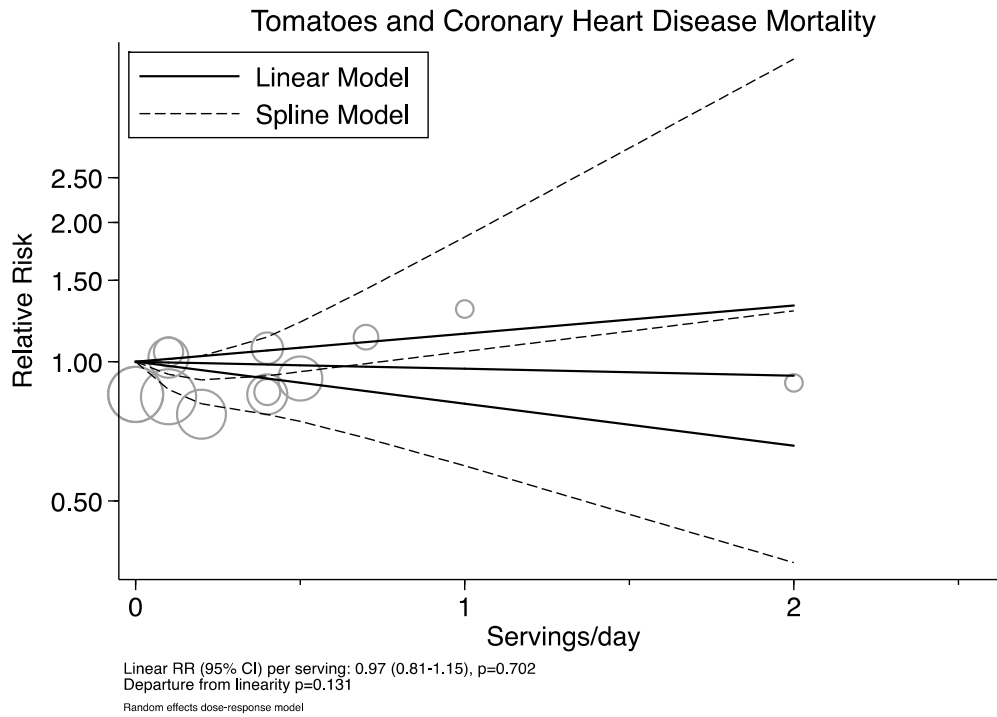

**Figure S116.** Linear dose-response relation between increasing tomato intake and coronary heart disease mortality. Linear dose-response data was modeled using the Greenland and Longnecker<sup>23</sup> method to estimate the covariances of multivariable-adjusted relative risk, with kept on the original dose scale. Dashed lines represent the pointwise 95% confidence intervals for the fitted linear trend represented by a solid line. Individual observations are represented by the circles, with the weight of the study in the overall analysis represented by the size of the circles.

## TOTAL FRUIT AND VEGETABLES AND STROKE INCIDENCE

### A. Fixed Effects

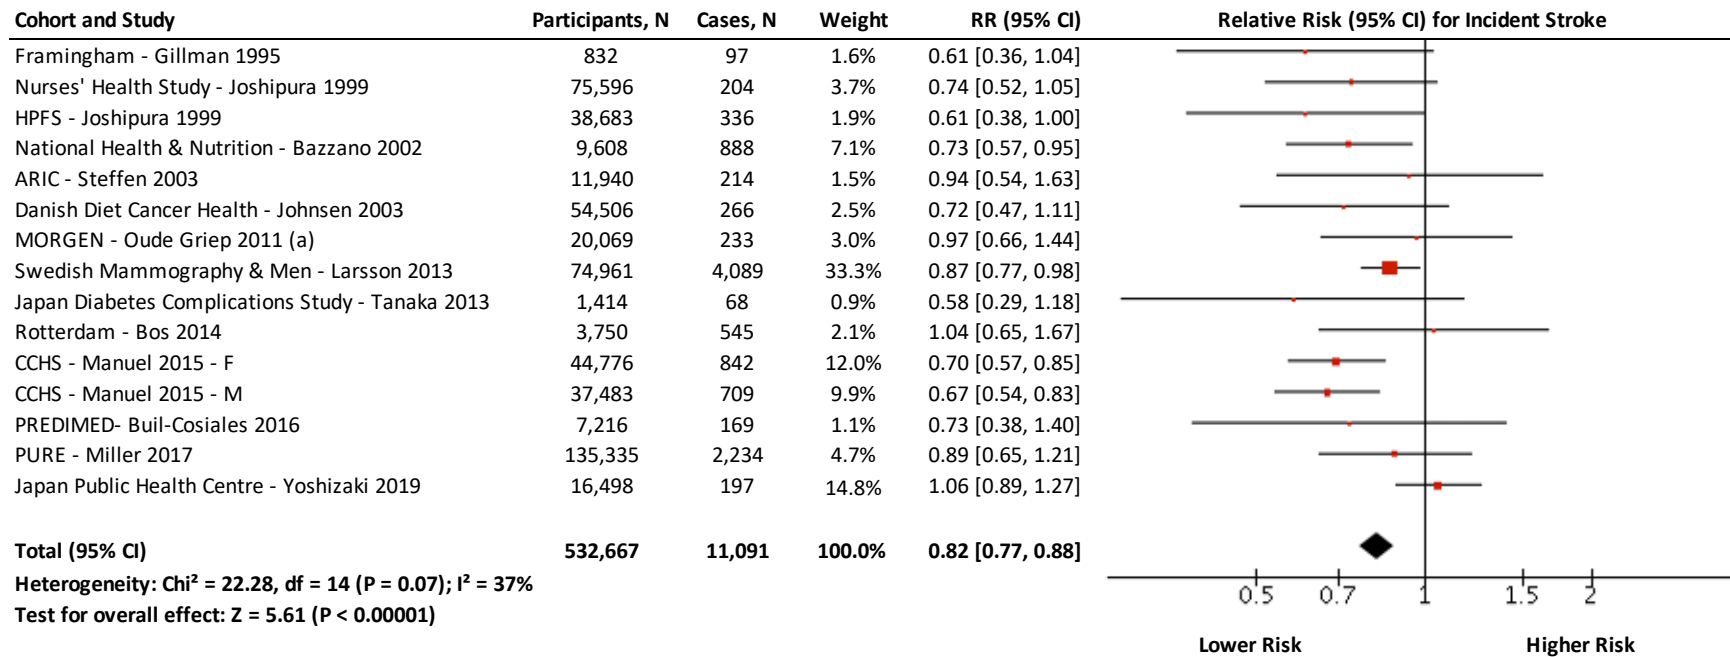

## B. Random Effects

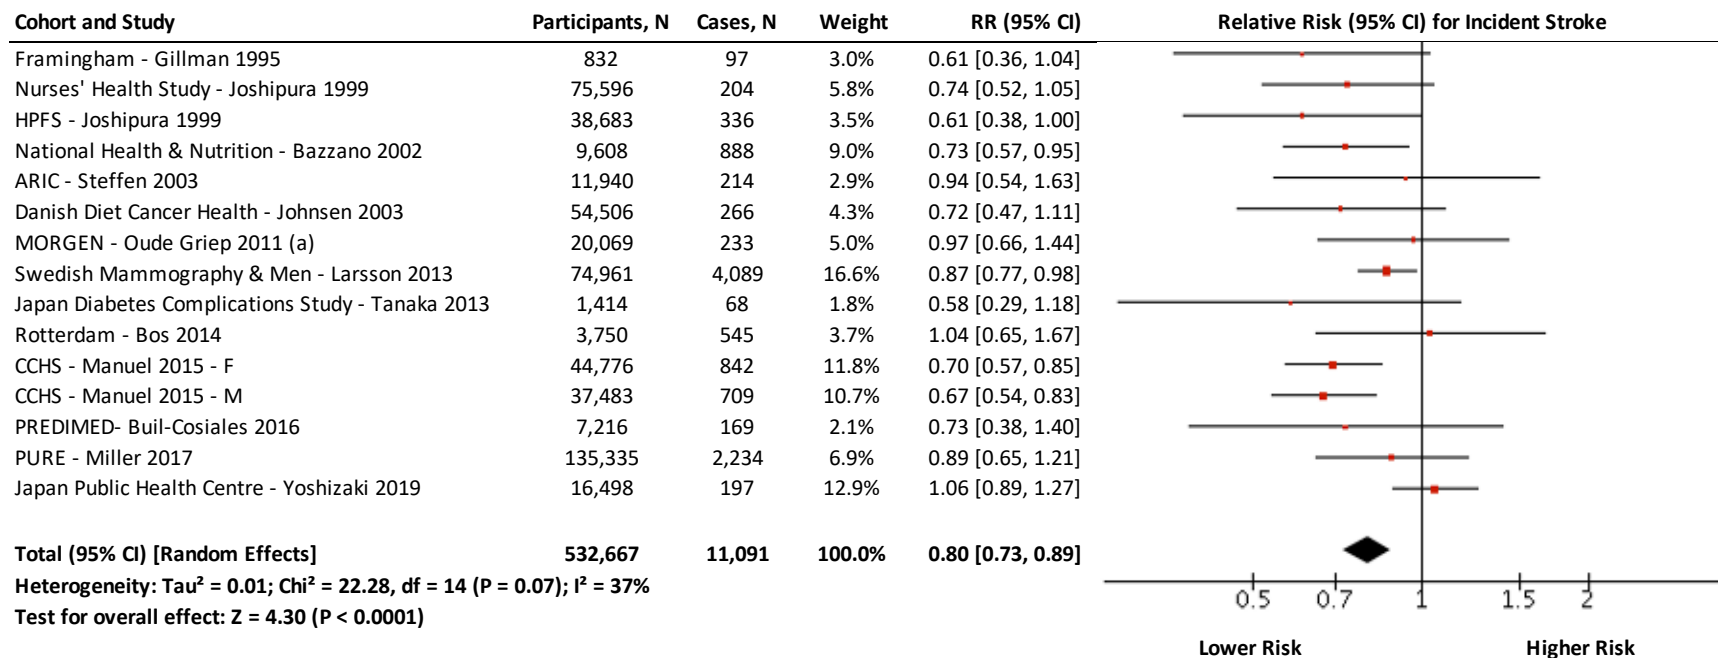

**Figure S117.** Relation between total fruit and vegetables intake and stroke incidence (highest vs. lowest level of intake). All results are presented as relative risk (RR) with 95% confidence intervals (95% CI). Pooled risk estimate is represented by the black diamond using (A) fixed effects and (B) random effects models. Inter-study heterogeneity was assessed using the Cochran Q statistic (Chi<sup>2</sup>) at a significance level of p<0.10, and quantified by I<sup>2</sup>, with values ≥ 50% indicating substantial heterogeneity.

## FRUIT AND STROKE INCIDENCE

### A. Fixed Effects

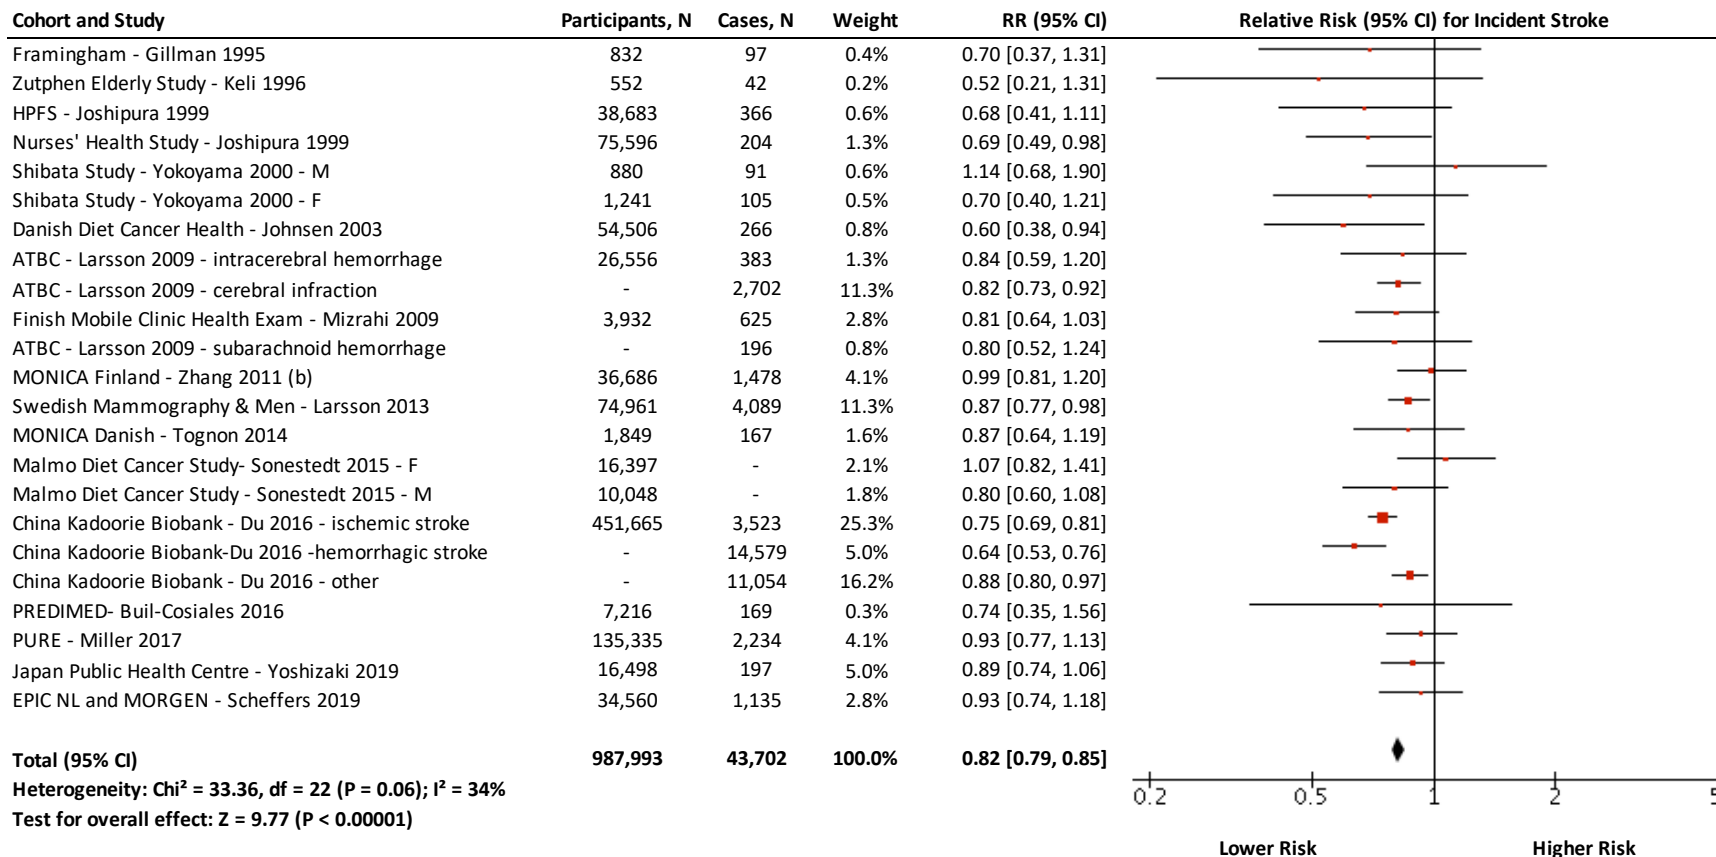

## B. Random Effects

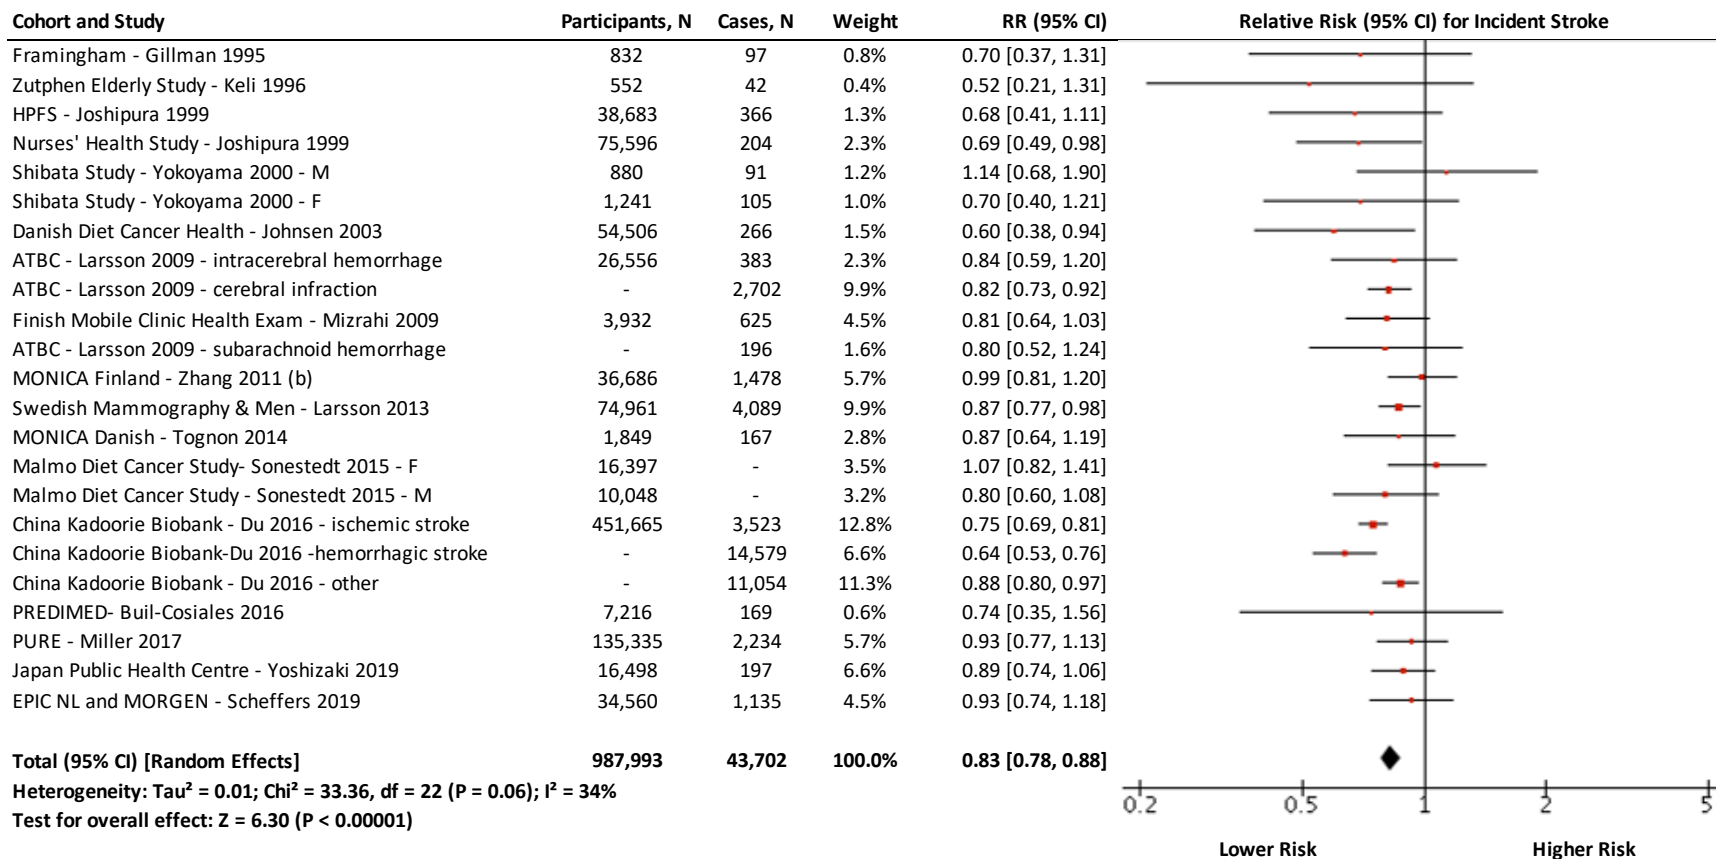

**Figure S118.** Relation between fruit intake and stroke incidence (highest vs. lowest level of intake). All results are presented as relative risk (RR) with 95% confidence intervals (95% CI). Pooled risk estimate is represented by the black diamond using (A) fixed effects and (B) random effects models. Inter-study heterogeneity was assessed using the Cochran Q statistic ( $\chi^2$ ) at a significance level of  $p < 0.10$ , and quantified by  $I^2$ , with values  $\geq 50\%$  indicating substantial heterogeneity.

## VEGETABLES AND STROKE INCIDENCE

### A. Fixed Effects

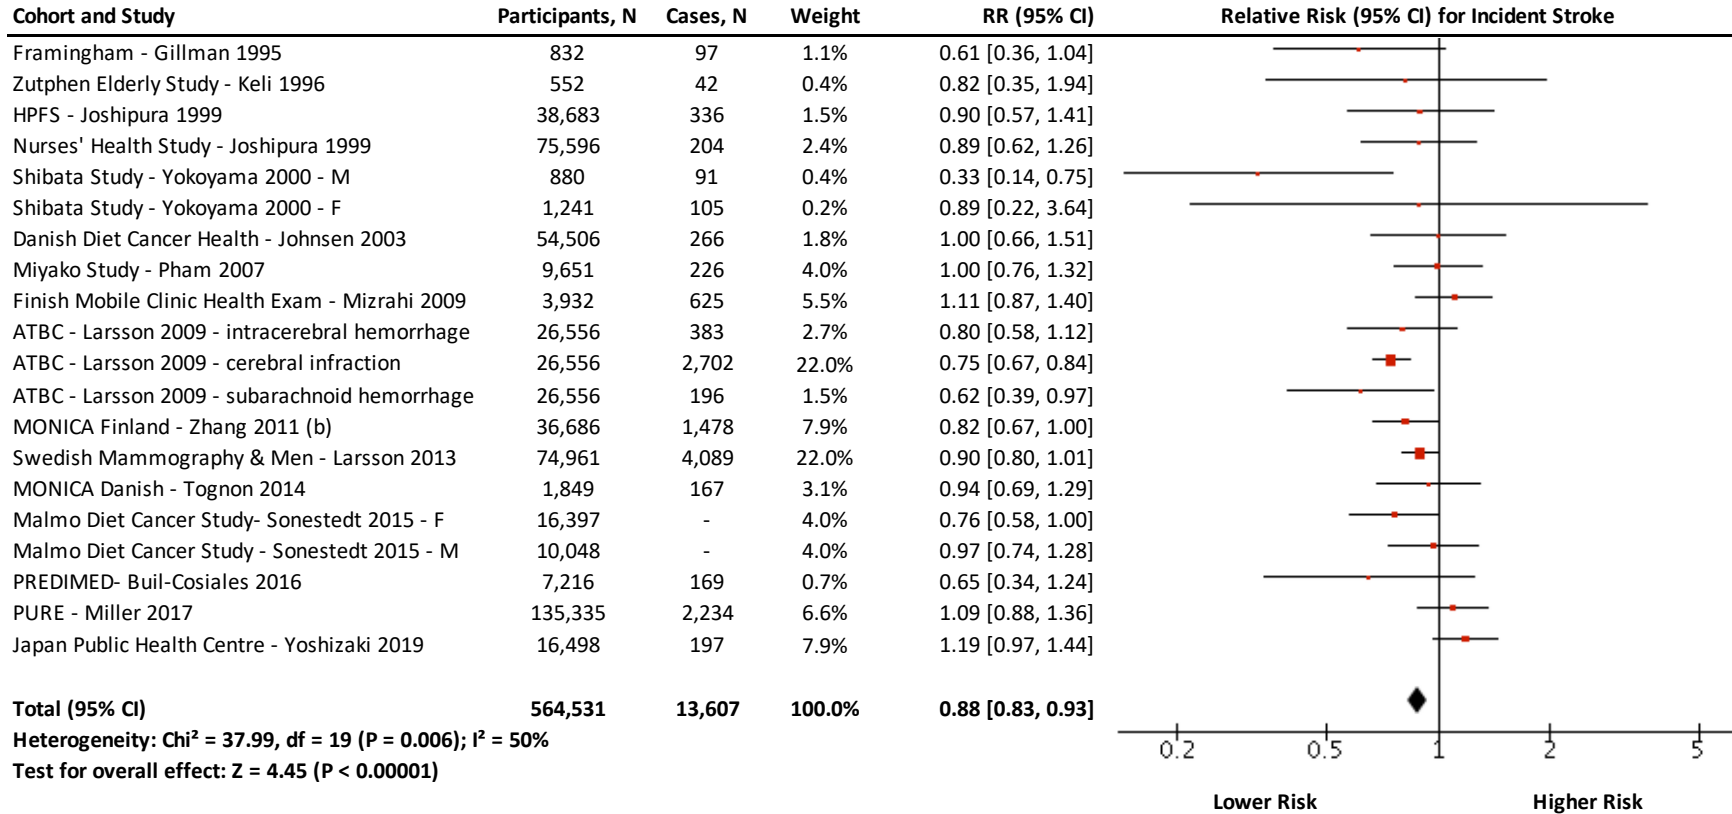

## B. Random Effects

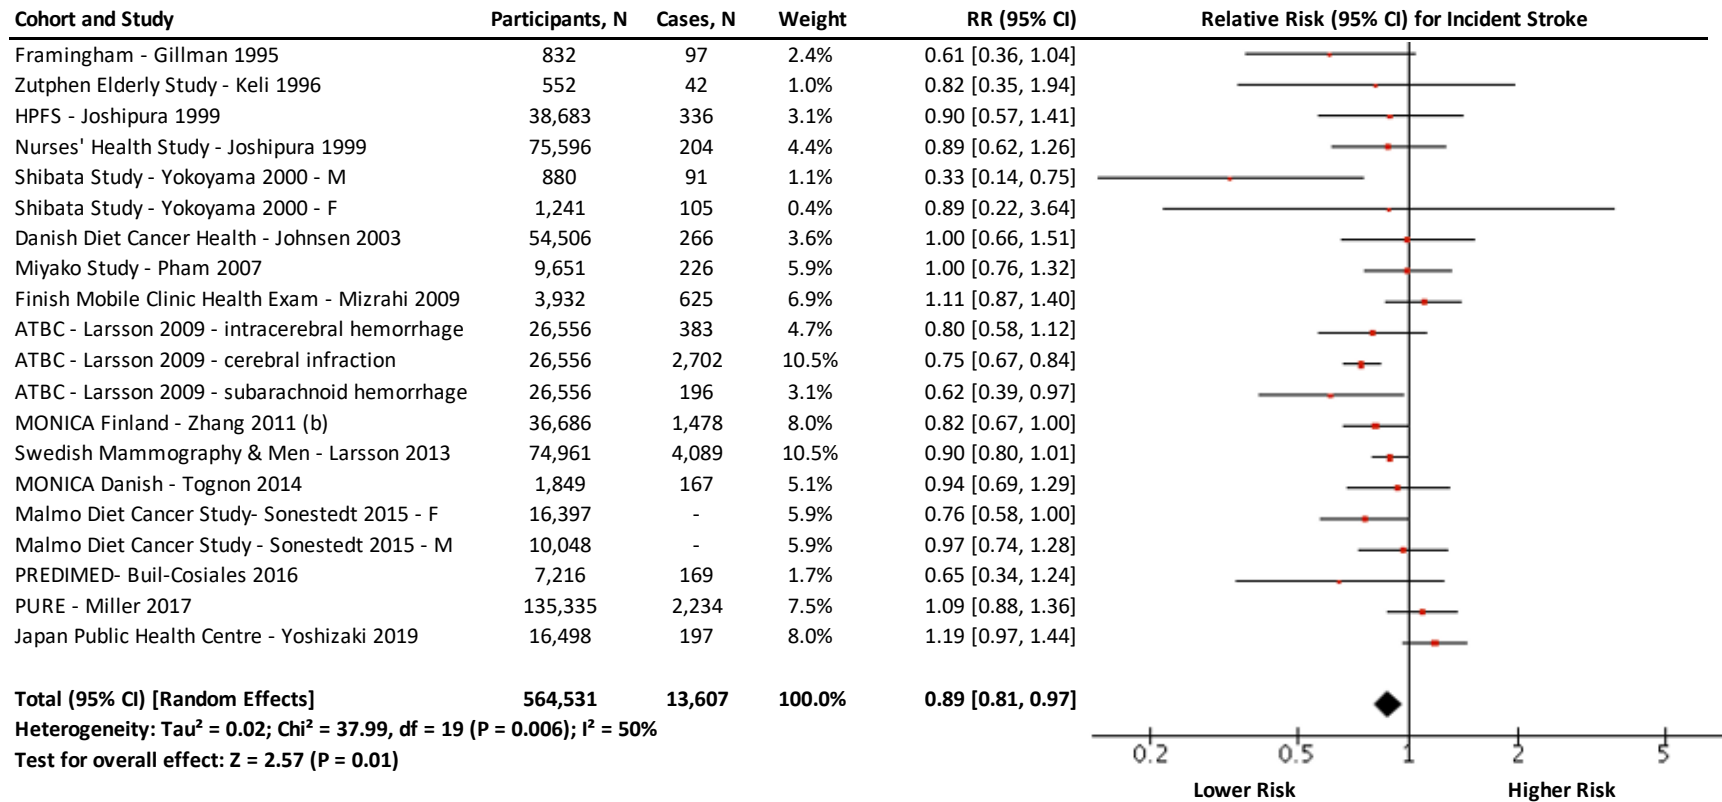

**Figure S119.** Relation between intake of vegetables and stroke incidence (highest vs. lowest level of intake). All results are presented as relative risk (RR) with 95% confidence intervals (95% CI). Pooled risk estimate is represented by the black diamond using (A) fixed effects and (B) random effects models. Inter-study heterogeneity was assessed using the Cochran Q statistic ( $\chi^2$ ) at a significance level of  $p < 0.10$ , and quantified by  $I^2$ , with values  $\geq 50\%$  indicating substantial heterogeneity.

## BERRIES AND STROKE INCIDENCE

### A. Fixed Effects

| Cohort and Study                                | Participants, N | Cases, N | Weight | RR (95% CI)       |
|-------------------------------------------------|-----------------|----------|--------|-------------------|
| ATBC - Hirvonen 2000 - intracerebral hemorrhage | 26,593          | 95       | 2.7%   | 0.81 [0.65, 1.01] |
| ATBC - Hirvonen 2000 - cerebral infarction      | -               | 736      | 17.6%  | 1.16 [0.63, 2.13] |
| ATBC - Hirvonen 2000 - subarachnoid hemorrhage  | -               | 83       | 2.2%   | 0.87 [0.50, 1.50] |
| WHS - Sesso 2007                                | 38,176          | 339      | 3.4%   | 1.40 [0.86, 2.29] |
| Finish Mobile Clinic Health Exam - Mizrahi 2009 | 3,932           | 625      | 14.8%  | 0.92 [0.73, 1.17] |
| Swedish Mammography & Men - Larsson 2013        | 74,961          | 4,089    | 59.2%  | 1.13 [1.00, 1.27] |

**Total (95% CI)** **143,662** **5,967** **100.0%** **1.03 [0.94, 1.13]**

**Heterogeneity: Chi<sup>2</sup> = 9.90, df = 5 (P = 0.08); I<sup>2</sup> = 50%**

**Test for overall effect: Z = 0.72 (P = 0.47)**

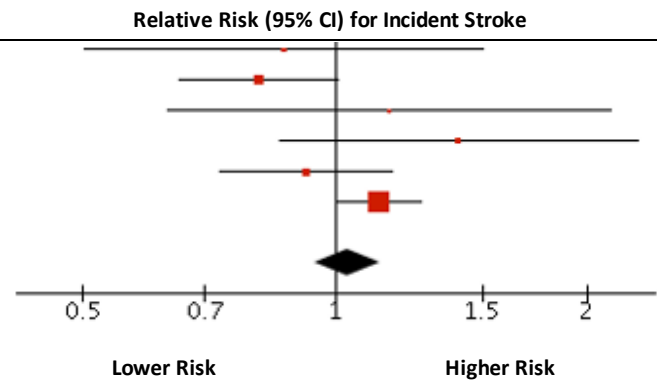

### B. Random Effects

| Cohort and Study                                | Participants, N | Cases, N | Weight | RR (95% CI)       |
|-------------------------------------------------|-----------------|----------|--------|-------------------|
| ATBC - Hirvonen 2000 - cerebral infarction      | 26,593          | 736      | 23.40% | 0.81 [0.65, 1.01] |
| ATBC - Hirvonen 2000 - subarachnoid hemorrhage  | -               | 83       | 6.10%  | 1.16 [0.63, 2.13] |
| ATBC - Hirvonen 2000 - intracerebral hemorrhage | -               | 95       | 7.20%  | 0.87 [0.50, 1.50] |
| WHS - Sesso 2007                                | 38,176          | 339      | 8.70%  | 1.40 [0.86, 2.29] |
| Finish Mobile Clinic Health Exam - Mizrahi 2009 | 3,932           | 625      | 21.70% | 0.92 [0.73, 1.17] |
| Swedish Mammography & Men - Larsson 2013        | 74,961          | 4,089    | 32.80% | 1.13 [1.00, 1.27] |

**Total (95% CI) [Random Effects]** **143,662** **5,967** **100.0%** **1.00 [0.85, 1.18]**

**Heterogeneity: Tau<sup>2</sup> = 0.02; Chi<sup>2</sup> = 9.90, df = 5 (P = 0.08); I<sup>2</sup> = 50%**

**Test for overall effect: Z = 0.02 (P = 0.99)**

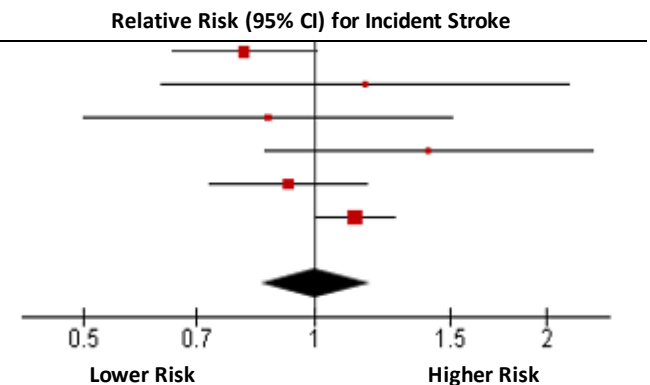

**Figure S120.** Relation between intake of berries and stroke incidence (highest vs. lowest level of intake). All results are presented as relative risk (RR) with 95% confidence intervals (95% CI). Pooled risk estimate is represented by the black diamond using (A) fixed effects and (B) random effects models. Inter-study heterogeneity was assessed using the Cochran Q statistic (Chi<sup>2</sup>) at a significance level of p<0.10, and quantified by I<sup>2</sup>, with values ≥ 50% indicating substantial heterogeneity.



## CITRUS FRUIT AND STROKE INCIDENCE

### A. Fixed Effects

| Cohort and Study                                | Participants, N | Cases, N     | Weight        | RR (95% CI)              | Relative Risk (95% CI) for Incident Stroke |
|-------------------------------------------------|-----------------|--------------|---------------|--------------------------|--------------------------------------------|
| Zutphen Elderly Study - Keli 1996               | 552             | 42           | 0.7%          | 0.93 [0.39, 2.21]        |                                            |
| HPFS - Joshipura 1999                           | 38,683          | 366          | 2.5%          | 0.92 [0.59, 1.45]        |                                            |
| Finish Mobile Clinic Health Exam - Mizrahi 2009 | 3,932           | 625          | 13.1%         | 0.77 [0.63, 0.94]        |                                            |
| Jidni Medical School - Yamada 2011 - F          | 6,476           | 183          | 1.4%          | 0.47 [0.25, 0.86]        |                                            |
| Jidni Medical School - Yamada 2011 - M          | 4,147           | 201          | 1.0%          | 0.40 [0.20, 0.81]        |                                            |
| Nurses' Health Study - Cassidy 2012             | 69,622          | 943          | 20.5%         | 0.90 [0.77, 1.05]        |                                            |
| Swedish Mammography & Men - Larsson 2013        | 74,961          | 4,089        | 52.4%         | 0.95 [0.86, 1.05]        |                                            |
| PREDIMED- Buil-Cosiales 2016                    | 7,216           | 169          | 1.8%          | 0.98 [0.58, 1.66]        |                                            |
| REGARDS - Goetz 2016 (b)                        | 20,024          | 524          | 6.7%          | 0.69 [0.52, 0.91]        |                                            |
| <b>Total (95% CI)</b>                           | <b>225,613</b>  | <b>7,142</b> | <b>100.0%</b> | <b>0.88 [0.82, 0.94]</b> |                                            |

Heterogeneity:  $\text{Chi}^2 = 16.43$ ,  $\text{df} = 8$  ( $P = 0.04$ );  $I^2 = 51\%$   
 Test for overall effect:  $Z = 3.59$  ( $P = 0.0003$ )

## B. Random Effects

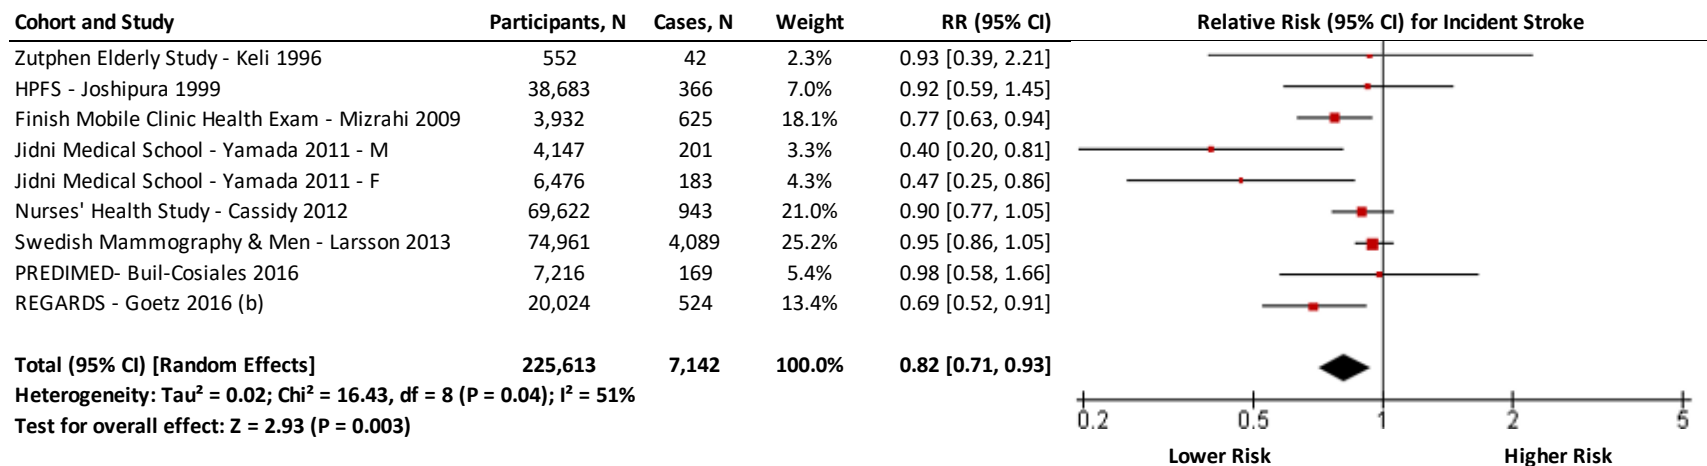

**Figure S121.** Relation between citrus fruit intake and stroke incidence (highest vs. lowest level of intake). All results are presented as relative risk (RR) with 95% confidence intervals (95% CI). Pooled risk estimate is represented by the black diamond using (A) fixed effects and (B) random effects models. Inter-study heterogeneity was assessed using the Cochran Q statistic ( $\chi^2$ ) at a significance level of  $p < 0.10$ , and quantified by  $I^2$ , with values  $\geq 50\%$  indicating substantial heterogeneity.

## FRUIT JUICE AND STROKE INCIDENCE

### A. Fixed Effects

| Cohort and Study                                                                                                                    | Participants, N | Cases, N     | Weight        | RR (95% CI)              |
|-------------------------------------------------------------------------------------------------------------------------------------|-----------------|--------------|---------------|--------------------------|
| Nurses' Health Study - Joshipura 1999                                                                                               | 75,596          | 204          | 34.6%         | 0.61 [0.45, 0.84]        |
| HPFS - Joshipura 1999                                                                                                               | 38,683          | 366          | 20.1%         | 0.74 [0.49, 1.12]        |
| EPIC NL and MORGEN - Scheffers 2019                                                                                                 | 34,560          | 1,135        | 45.2%         | 1.08 [0.82, 1.43]        |
| <b>Total (95% CI)</b>                                                                                                               | <b>148,839</b>  | <b>1,705</b> | <b>100.0%</b> | <b>0.82 [0.68, 0.99]</b> |
| <b>Heterogeneity: <math>\text{Chi}^2 = 7.51</math>, <math>\text{df} = 2</math> (<math>P = 0.02</math>); <math>I^2 = 73\%</math></b> |                 |              |               |                          |
| <b>Test for overall effect: <math>Z = 2.06</math> (<math>P = 0.04</math>)</b>                                                       |                 |              |               |                          |

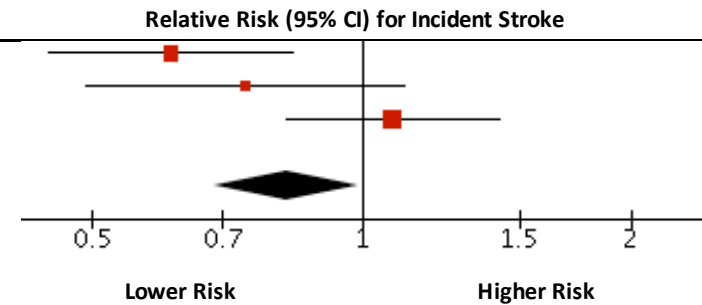

### B. Random Effects

| Cohort and Study                                                                                                                                                      | Participants, N | Cases, N     | Weight        | RR (95% CI)              |
|-----------------------------------------------------------------------------------------------------------------------------------------------------------------------|-----------------|--------------|---------------|--------------------------|
| Nurses' Health Study - Joshipura 1999                                                                                                                                 | 75,596          | 204          | 34.40%        | 0.61 [0.45, 0.84]        |
| HPFS - Joshipura 1999                                                                                                                                                 | 38,683          | 366          | 29.10%        | 0.74 [0.49, 1.12]        |
| EPIC NL and MORGEN - Scheffers 2019                                                                                                                                   | 34,560          | 1,135        | 36.50%        | 1.08 [0.82, 1.43]        |
| <b>Total (95% CI) [Random Effects]</b>                                                                                                                                | <b>148,839</b>  | <b>1,705</b> | <b>100.0%</b> | <b>0.80 [0.55, 1.15]</b> |
| <b>Heterogeneity: <math>\text{Tau}^2 = 0.08</math>; <math>\text{Chi}^2 = 7.51</math>, <math>\text{df} = 2</math> (<math>P = 0.02</math>); <math>I^2 = 73\%</math></b> |                 |              |               |                          |
| <b>Test for overall effect: <math>Z = 1.21</math> (<math>P = 0.23</math>)</b>                                                                                         |                 |              |               |                          |

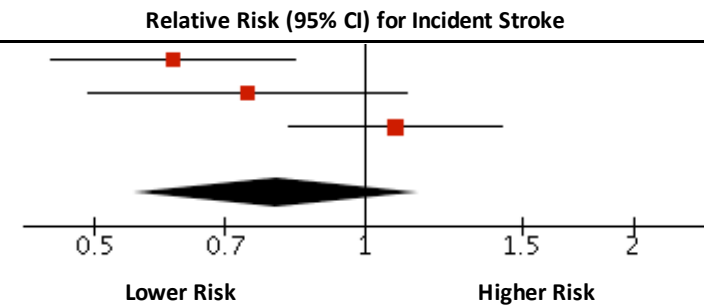

**Figure S122.** Relation between intake of fruit juice and stroke incidence (highest vs. lowest level of intake). All results are presented as relative risk (RR) with 95% confidence intervals (95% CI). Pooled risk estimate is represented by the black diamond using (A) fixed effects and (B) random effects models. Inter-study heterogeneity was assessed using the Cochran Q statistic ( $\text{Chi}^2$ ) at a significance level of  $p < 0.10$ , and quantified by  $I^2$ , with values  $\geq 50\%$  indicating substantial heterogeneity.

## POMMES AND STROKE INCIDENCE

### A. Fixed Effects

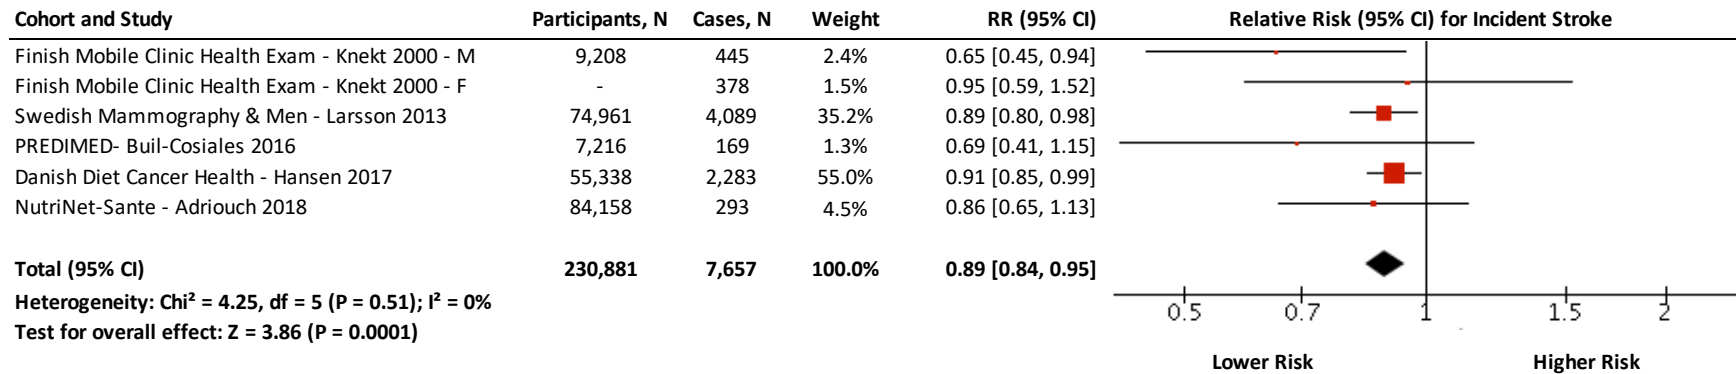

### B. Random Effects

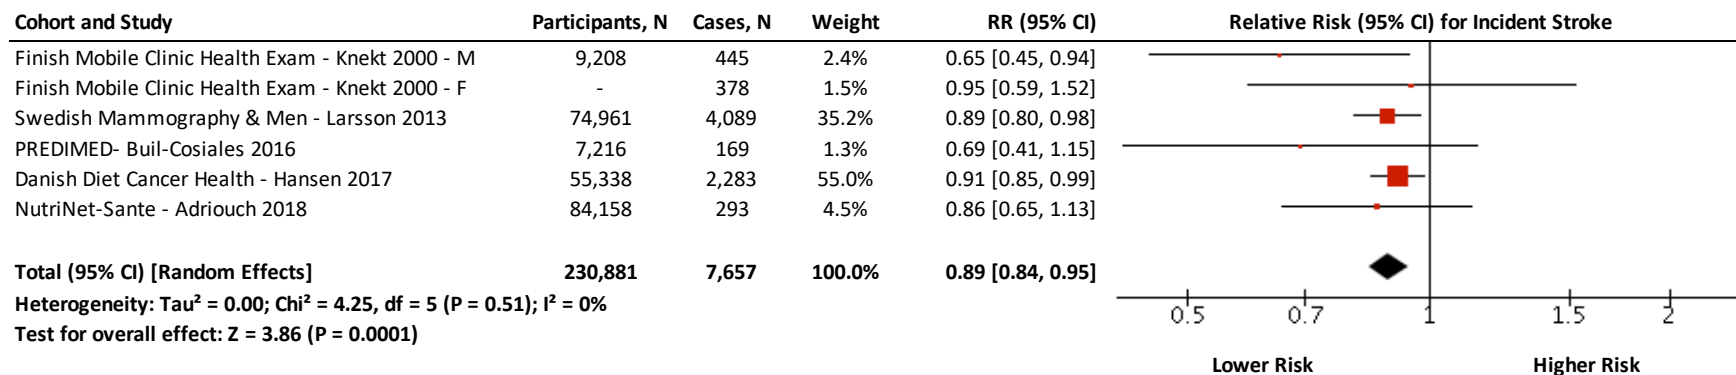

**Figure S123.** Relation between intake of pomes fruit and stroke incidence (highest vs. lowest level of intake). All results are presented as relative risk (RR) with 95% confidence intervals (95% CI). Pooled risk estimate is represented by the black diamond using (A) fixed effects and (B) random effects models. Inter-study heterogeneity was assessed using the Cochran Q statistic ( $\text{Chi}^2$ ) at a significance level of  $p < 0.10$ , and quantified by  $I^2$ , with values  $\geq 50\%$  indicating substantial heterogeneity.

## ALLIUM VEGETABLES AND STROKE INCIDENCE

### A. Fixed Effects

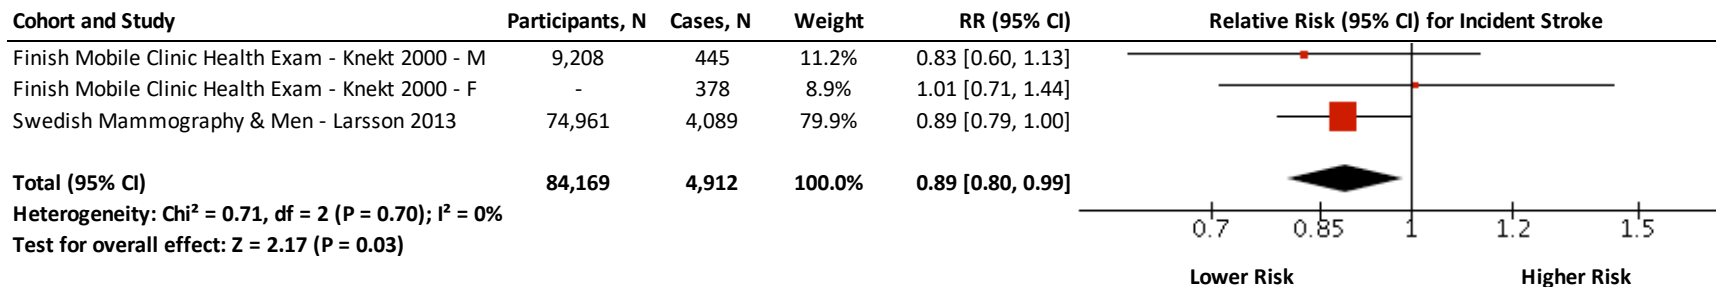

### B. Random Effects

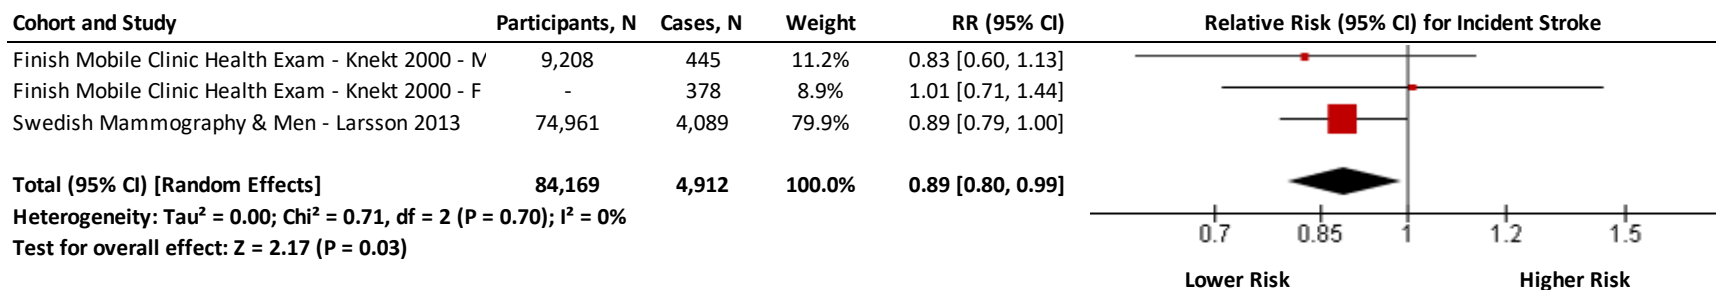

**Figure S124.** Relation between intake of allium vegetables and stroke incidence (highest vs. lowest level of intake). All results are presented as relative risk (RR) with 95% confidence intervals (95% CI). Pooled risk estimate is represented by the black diamond using (A) fixed effects and (B) random effects models. Inter-study heterogeneity was assessed using the Cochran Q statistic ( $\chi^2$ ) at a significance level of  $p < 0.10$ , and quantified by  $I^2$ , with values  $\geq 50\%$  indicating substantial heterogeneity.

## CRUCIFEROUS VEGETABLES AND STROKE INCIDENCE

### A. Fixed Effects

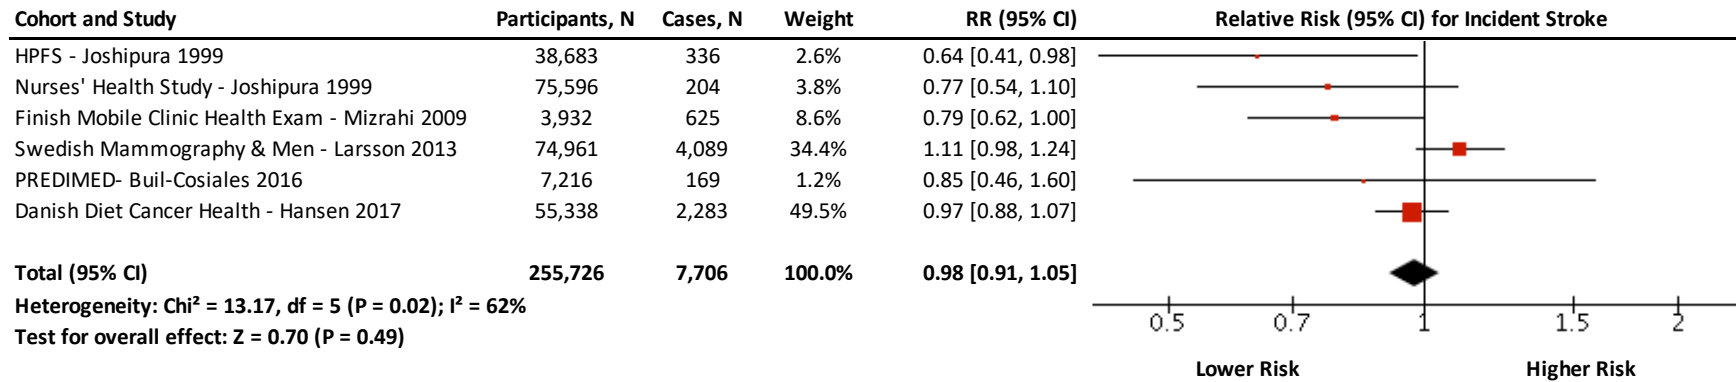

### B. Random Effects

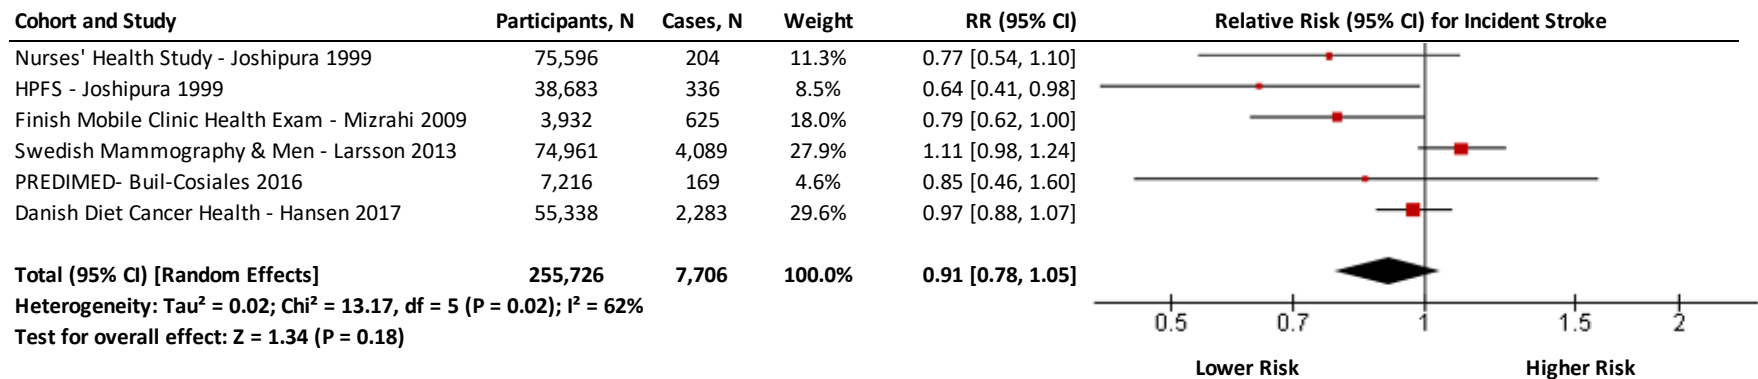

**Figure S125.** Relation between intake of cruciferous vegetables and stroke incidence (highest vs. lowest level of intake). All results are presented as relative risk (RR) with 95% confidence intervals (95% CI). Pooled risk estimate is represented by the black diamond using (A) fixed effects and (B) random effects models. Inter-study heterogeneity was assessed using the Cochran Q statistic ( $\text{Chi}^2$ ) at a significance level of  $p < 0.10$ , and quantified by  $I^2$ , with values  $\geq 50\%$  indicating substantial heterogeneity.

## GREEN LEAFY VEGETABLES AND STROKE INCIDENCE

### A. Fixed Effects

| Cohort and Study                         | Participants, N | Cases, N     | Weight        | RR (95% CI)              |
|------------------------------------------|-----------------|--------------|---------------|--------------------------|
| HPFS - Joshipura 1999                    | 38,683          | 336          | 5.4%          | 0.76 [0.49, 1.20]        |
| Nurses' Health Study - Joshipura 1999    | 75,596          | 204          | 11.1%         | 0.76 [0.56, 1.04]        |
| Swedish Mammography & Men - Larsson 2013 | 74,961          | 4,089        | 78.7%         | 0.92 [0.82, 1.04]        |
| PREDIMED- Buil-Cosiales 2016             | 7,216           | 169          | 4.9%          | 0.69 [0.43, 1.11]        |
| <b>Total (95% CI)</b>                    | <b>196,456</b>  | <b>4,798</b> | <b>100.0%</b> | <b>0.88 [0.79, 0.98]</b> |

Heterogeneity:  $\text{Chi}^2 = 2.82$ ,  $\text{df} = 3$  ( $P = 0.42$ );  $I^2 = 0\%$   
 Test for overall effect:  $Z = 2.36$  ( $P = 0.02$ )

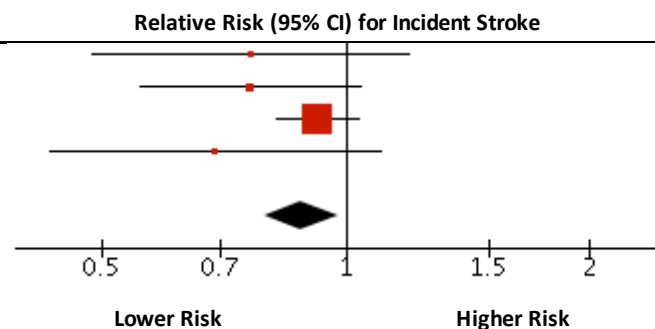

### B. Random Effects

| Cohort and Study                         | Participants, N | Cases, N     | Weight        | RR (95% CI)              |
|------------------------------------------|-----------------|--------------|---------------|--------------------------|
| Nurses' Health Study - Joshipura 1999    | 75,596          | 204          | 11.1%         | 0.76 [0.56, 1.04]        |
| HPFS - Joshipura 1999                    | 38,683          | 336          | 5.4%          | 0.76 [0.49, 1.20]        |
| Swedish Mammography & Men - Larsson 2013 | 74,961          | 4,089        | 78.7%         | 0.92 [0.82, 1.04]        |
| PREDIMED- Buil-Cosiales 2016             | 7,216           | 169          | 4.9%          | 0.69 [0.43, 1.11]        |
| <b>Total (95% CI) [Random Effects]</b>   | <b>196,456</b>  | <b>4,798</b> | <b>100.0%</b> | <b>0.88 [0.79, 0.98]</b> |

Heterogeneity:  $\text{Tau}^2 = 0.00$ ;  $\text{Chi}^2 = 2.82$ ,  $\text{df} = 3$  ( $P = 0.42$ );  $I^2 = 0\%$   
 Test for overall effect:  $Z = 2.36$  ( $P = 0.02$ )

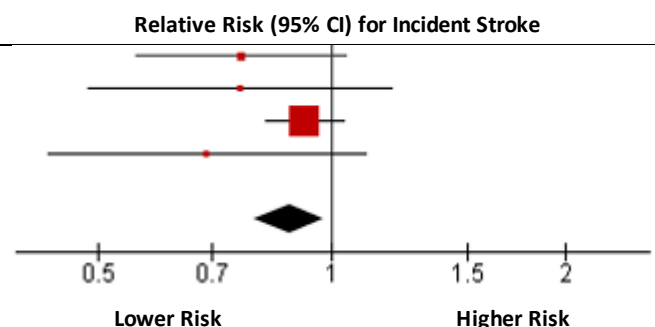

**Figure S126.** Relation between intake of green leafy vegetables and stroke incidence (highest vs. lowest level of intake). All results are presented as relative risk (RR) with 95% confidence intervals (95% CI). Pooled risk estimate is represented by the black diamond using (A) fixed effects and (B) random effects models. Inter-study heterogeneity was assessed using the Cochran Q statistic ( $\text{Chi}^2$ ) at a significance level of  $p < 0.10$ , and quantified by  $I^2$ , with values  $\geq 50\%$  indicating substantial heterogeneity.

## TOMATOES AND STROKE INCIDENCE

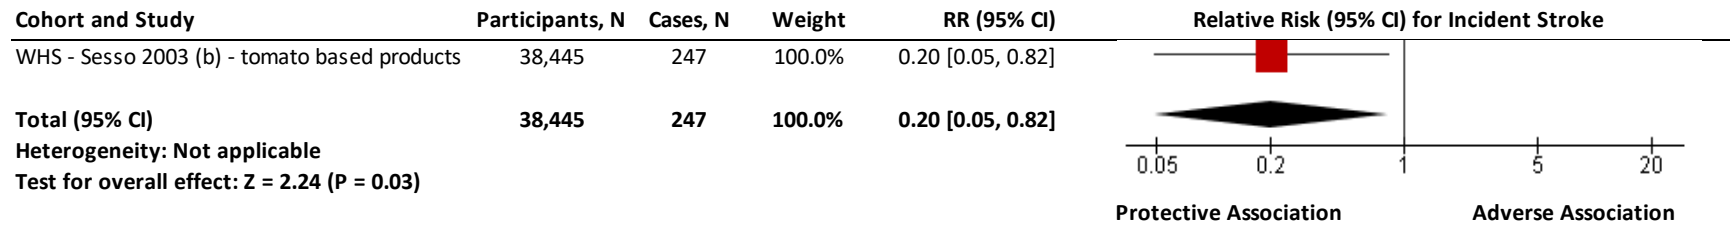

**Figure S127.** Relation between intake of tomatoes and stroke incidence (highest vs. lowest level of intake). All results are presented as relative risk (RR) with 95% confidence intervals (95% CI). Pooled risk estimate is represented by the black diamond. Inter-study heterogeneity was assessed using the Cochran Q statistic ( $\text{Chi}^2$ ) at a significance level of  $p < 0.10$ , and quantified by I, with values  $\geq 50\%$  indicating substantial heterogeneity.



## A. Fixed Effects

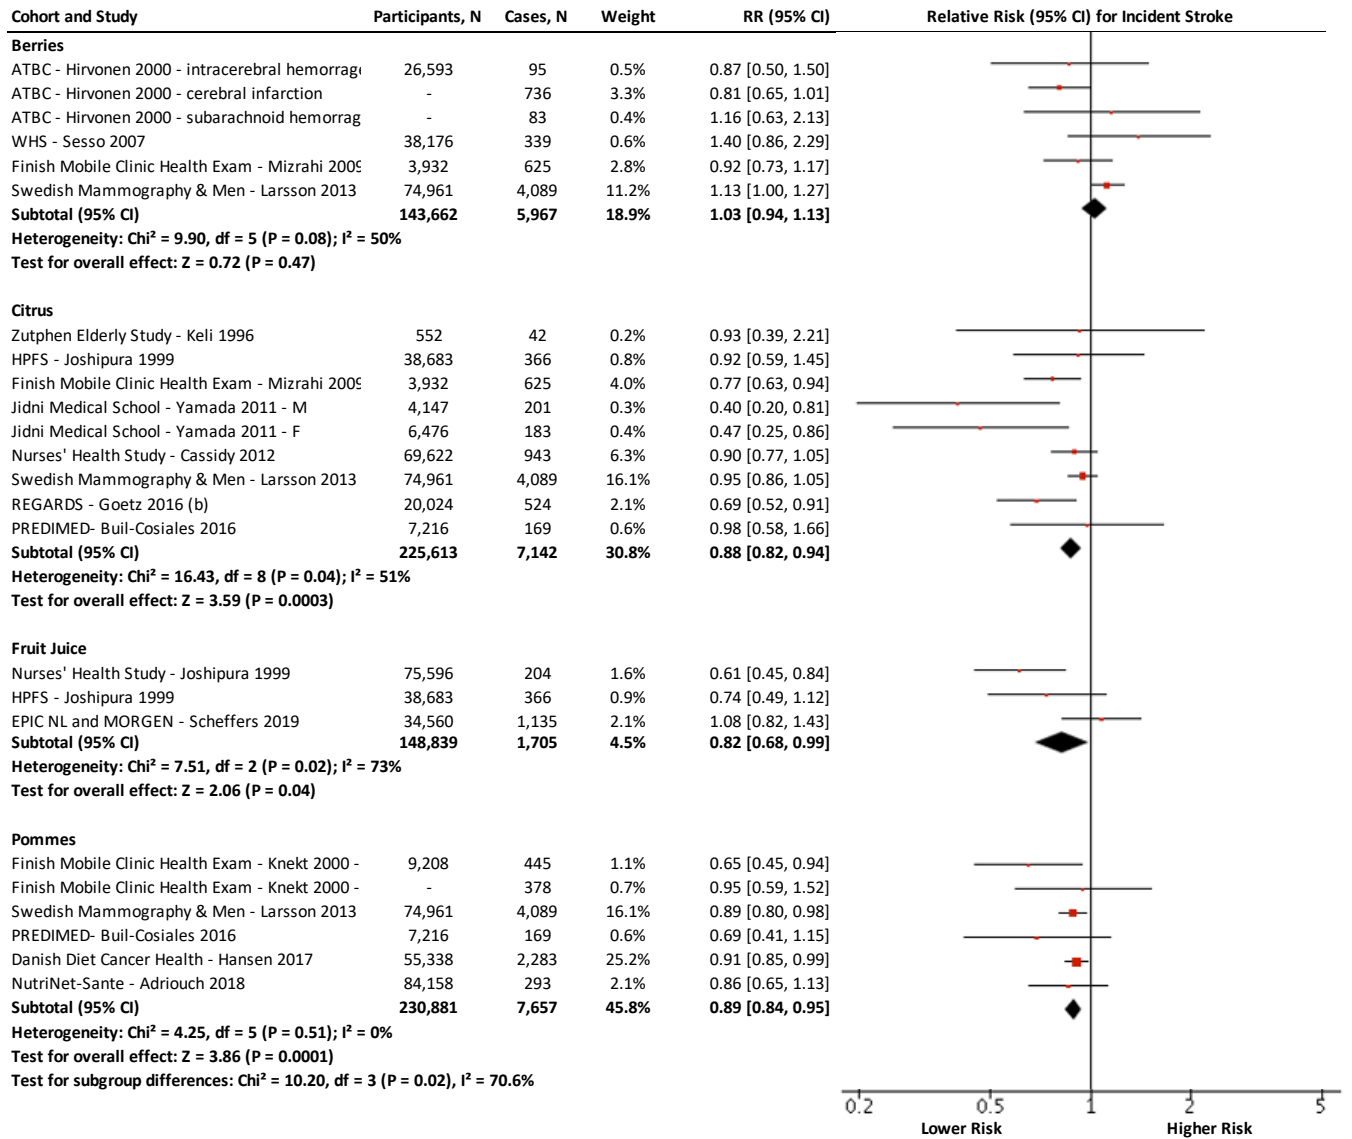

## B. Random Effects

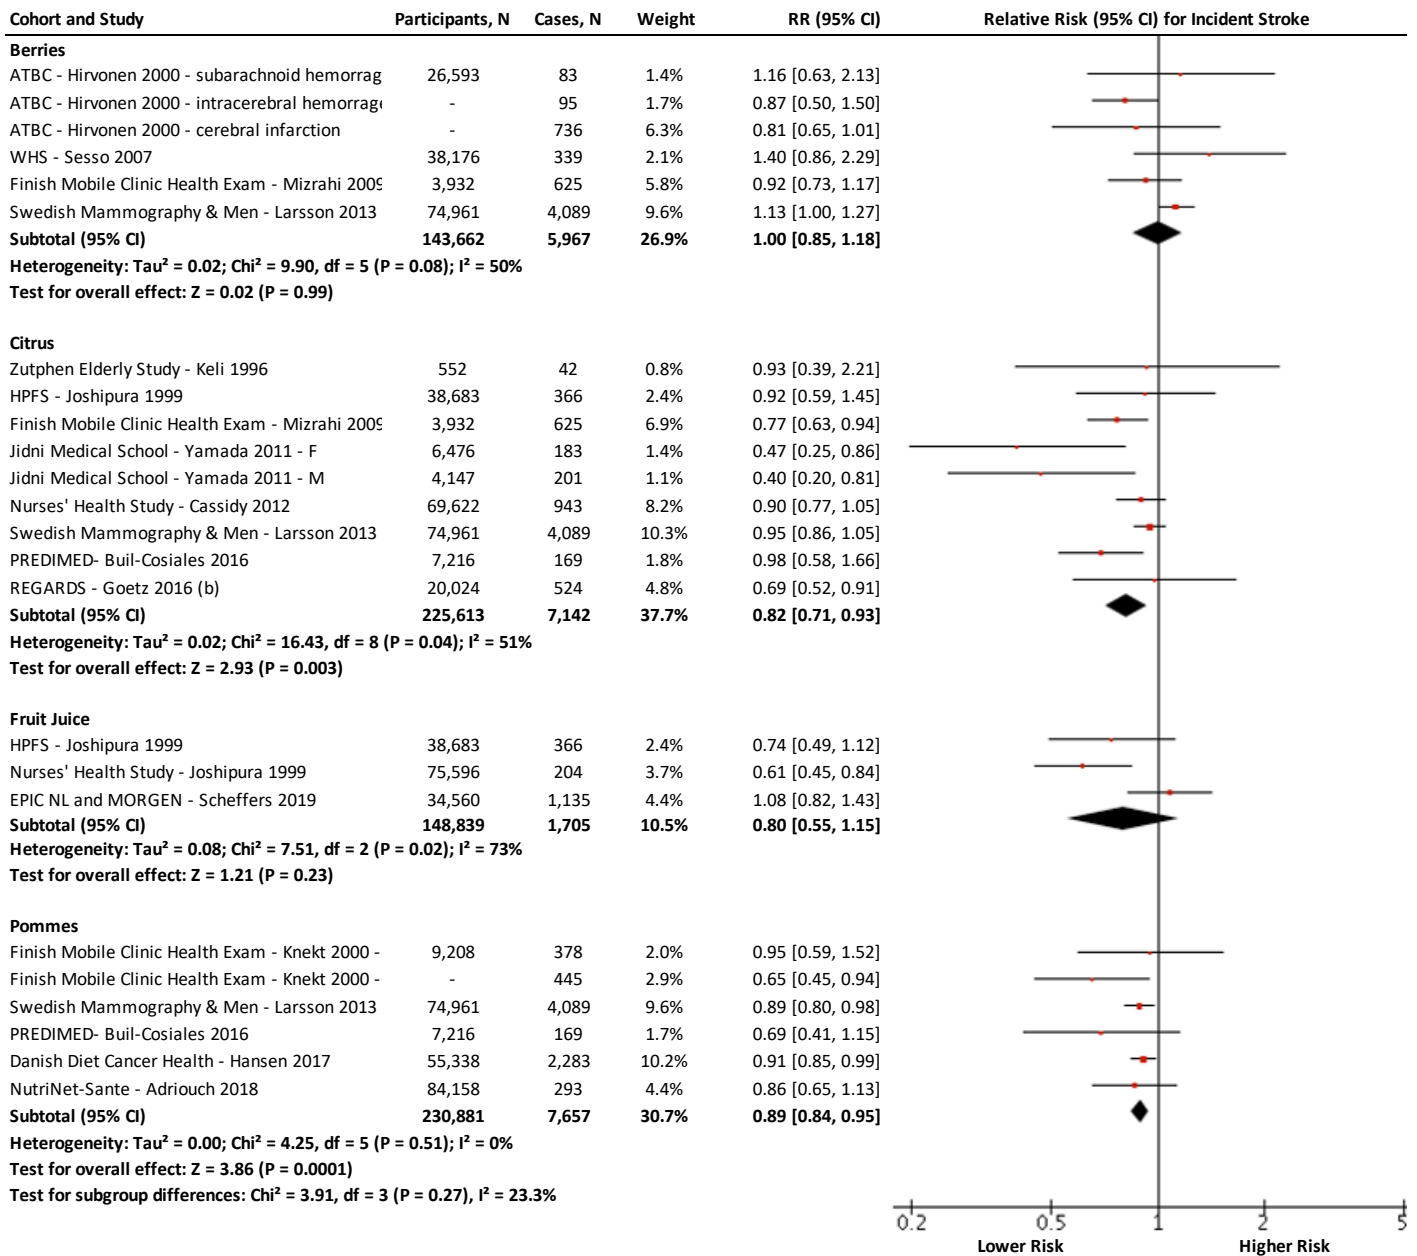

**Figure S128.** Relation between sources of fruit and stroke incidence (highest vs. lowest level of intake). All results are presented as relative risk (RR) with 95% confidence intervals (95% CI). Pooled risk estimate is represented by the black diamond using (A) fixed effects and (B) random effects models. Inter-study heterogeneity was assessed using the Cochran Q statistic (Chi<sup>2</sup>) at a significance level of p<0.10, and quantified by I<sup>2</sup>, with values ≥ 50% indicating substantial heterogeneity.

## A. Fixed Effects

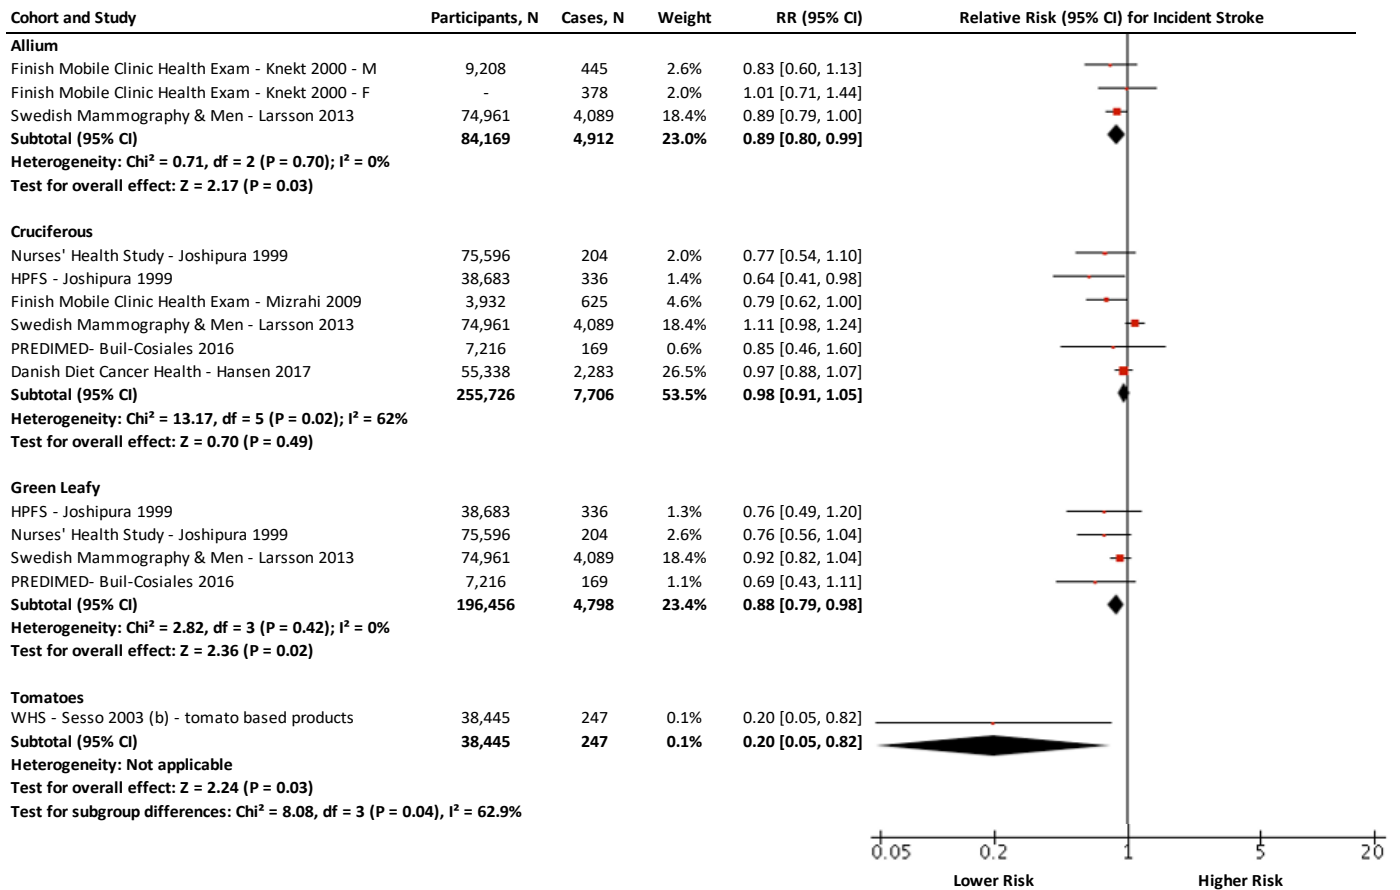

## B. Random Effects

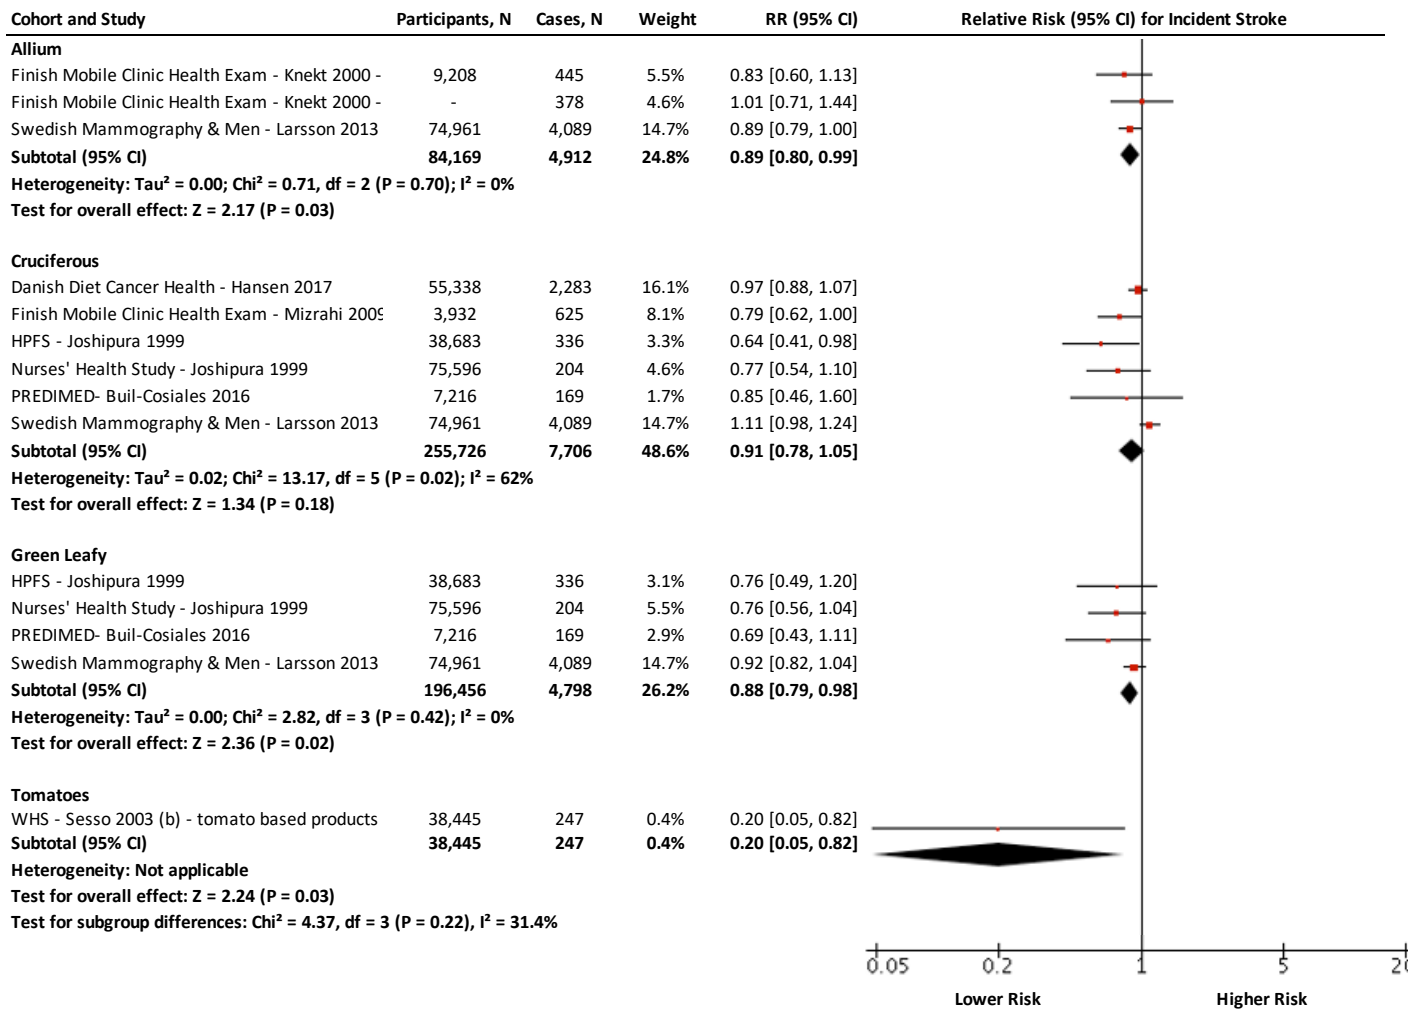

**Figure S129.** Relation between sources of vegetables and stroke incidence (highest vs. lowest level of intake). All results are presented as relative risk (RR) with 95% confidence intervals (95% CI). Pooled risk estimate is represented by the black diamond using (A) fixed effects and (B) random effects models. Inter-study heterogeneity was assessed using the Cochran Q statistic ( $\chi^2$ ) at a significance level of  $p < 0.10$ , and quantified by  $I^2$ , with values  $\geq 50\%$  indicating substantial heterogeneity.

## TOTAL FRUIT AND VEGETABLES AND STROKE MORTALITY

### A. Fixed Effects

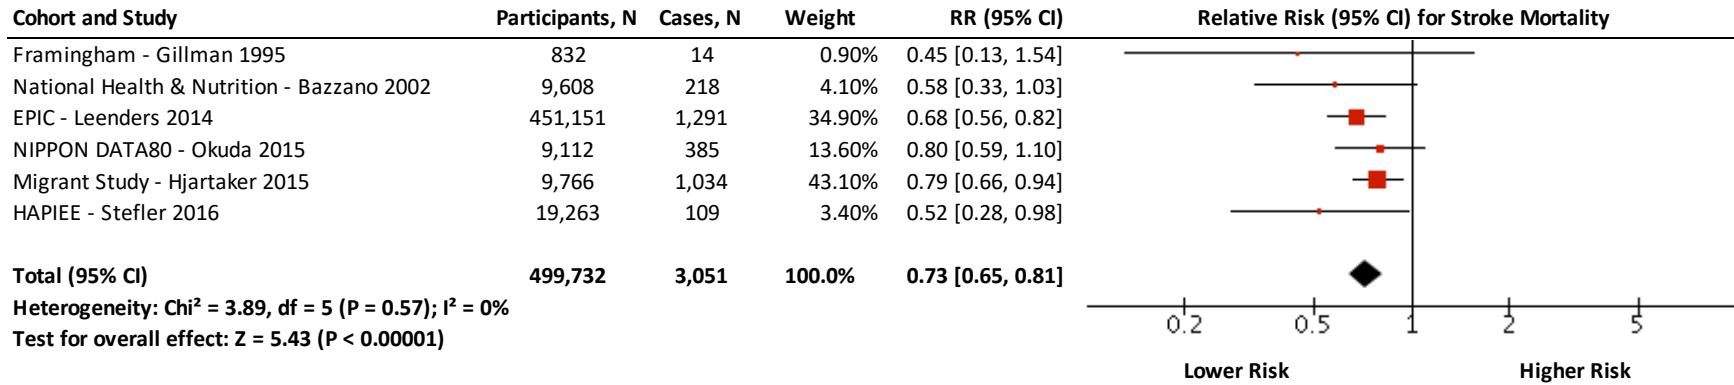

### B. Random Effects

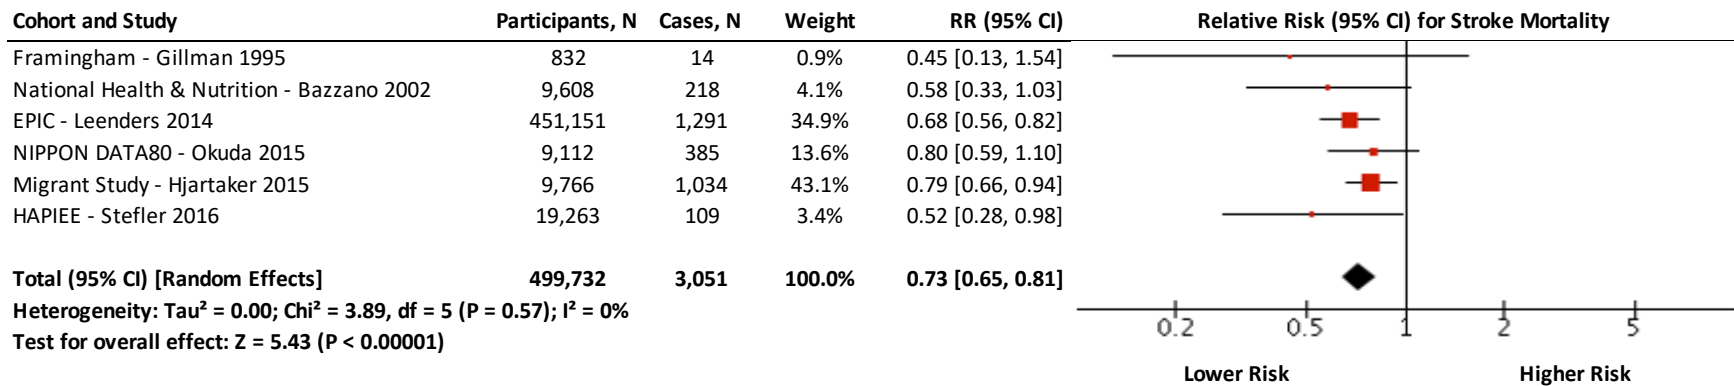

**Figure S130.** Relation between total fruit and vegetables intake and stroke mortality (highest vs. lowest level of intake). All results are presented as relative risk (RR) with 95% confidence intervals (95% CI). Pooled risk estimate is represented by the black diamond using (A) fixed effects and (B) random effects models. Inter-study heterogeneity was assessed using the Cochran Q statistic ( $\text{Chi}^2$ ) at a significance level of  $p < 0.10$ , and quantified by  $I^2$ , with values  $\geq 50\%$  indicating substantial heterogeneity.

## FRUIT AND STROKE MORTALITY

### A. Fixed Effects

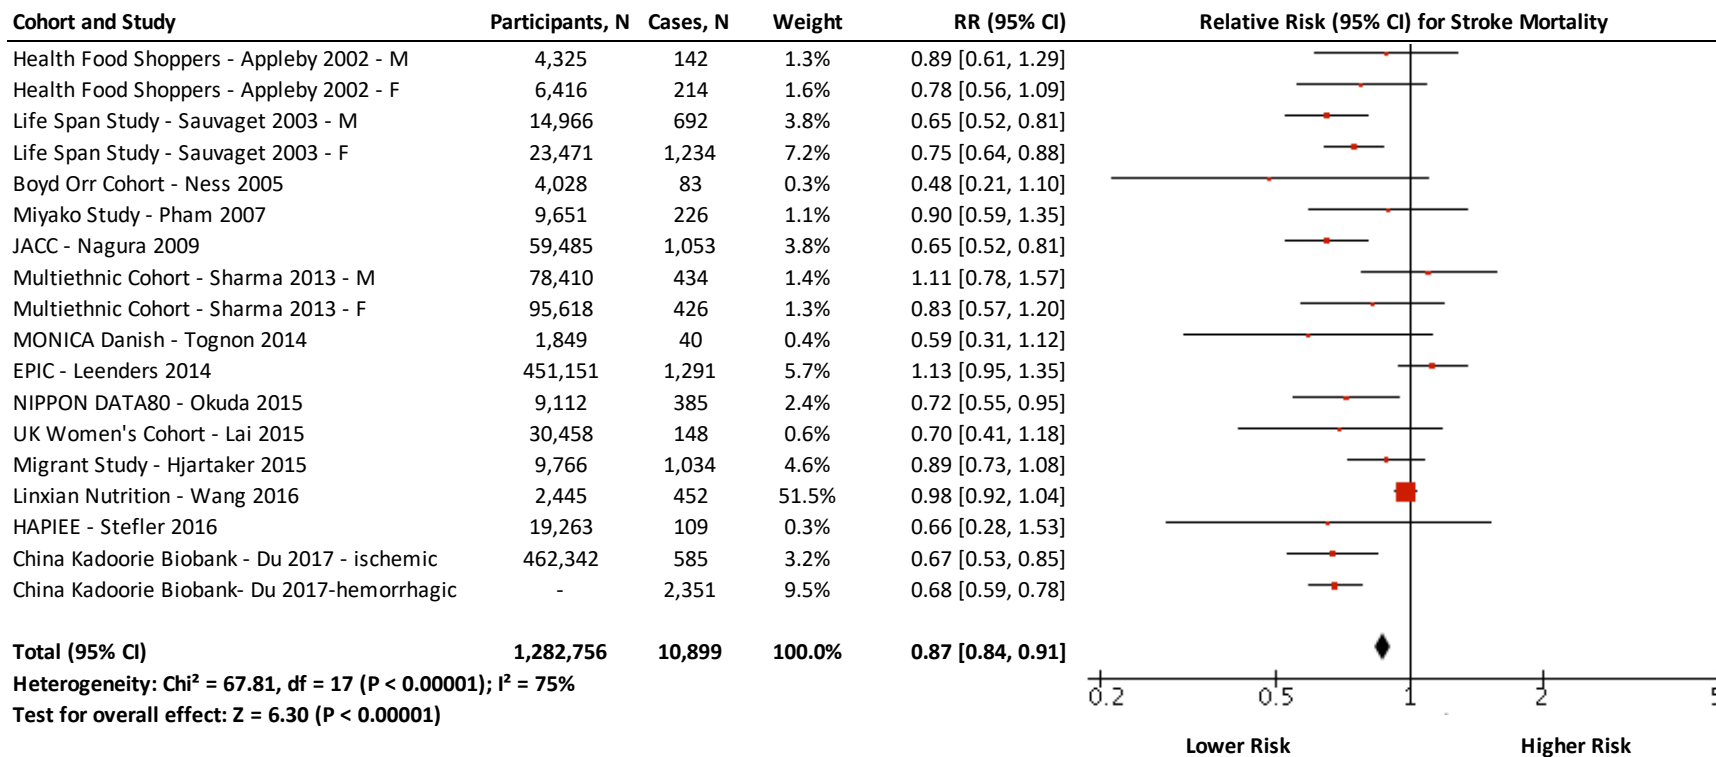

## B. Random Effects

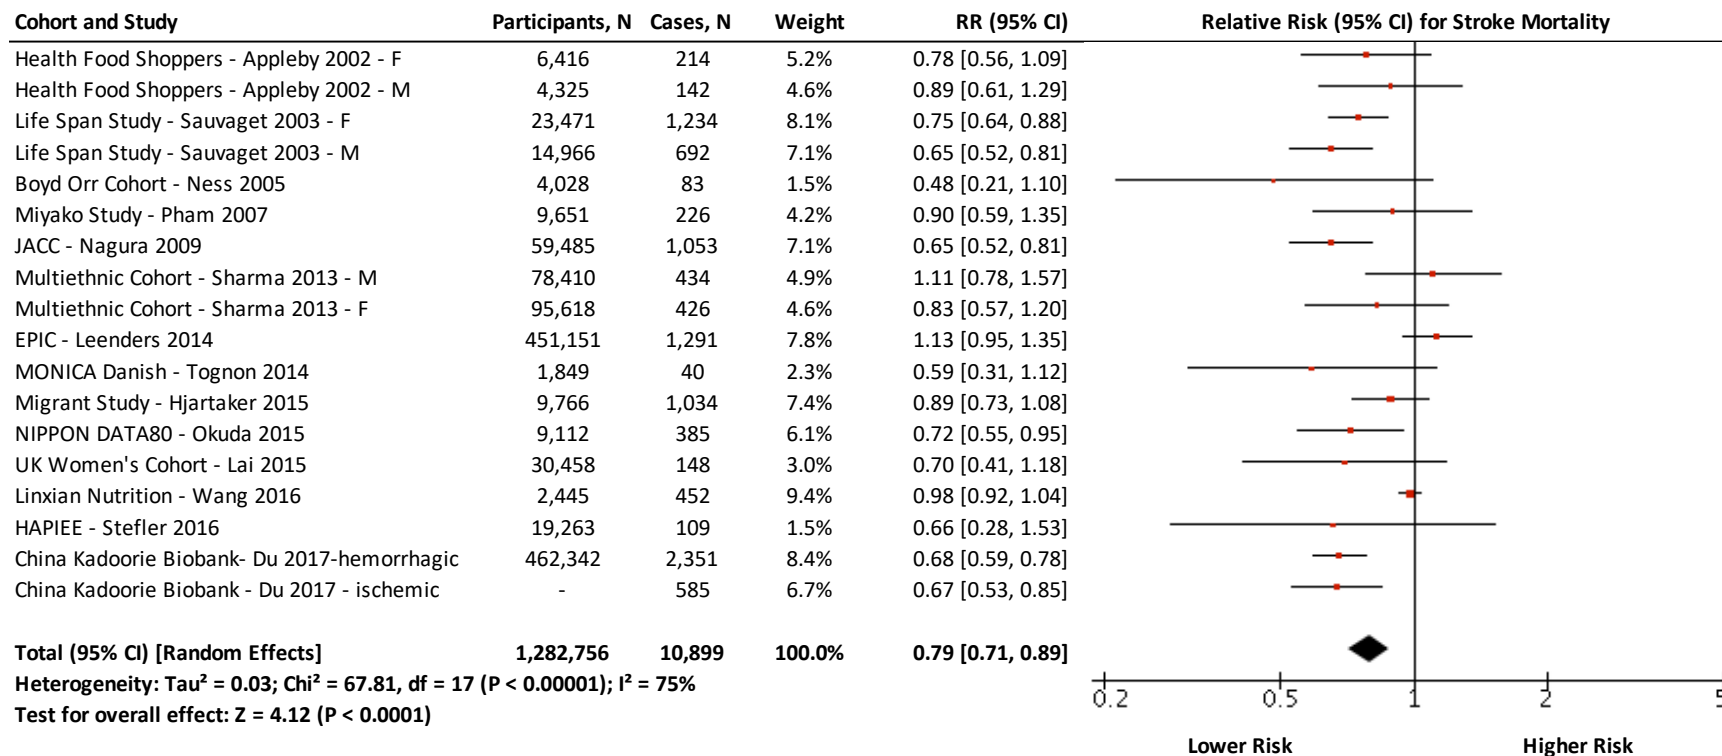

**Figure S131.** Relation between fruit intake and stroke mortality (highest vs. lowest level of intake). All results are presented as relative risk (RR) with 95% confidence intervals (95% CI). Pooled risk estimate is represented by the black diamond using (A) fixed effects and (B) random effects models. Inter-study heterogeneity was assessed using the Cochran Q statistic (Chi<sup>2</sup>) at a significance level of p<0.10, and quantified by I<sup>2</sup>, with values ≥ 50% indicating substantial heterogeneity.

## VEGETABLES AND STROKE MORTALITY

### A. Fixed Effects

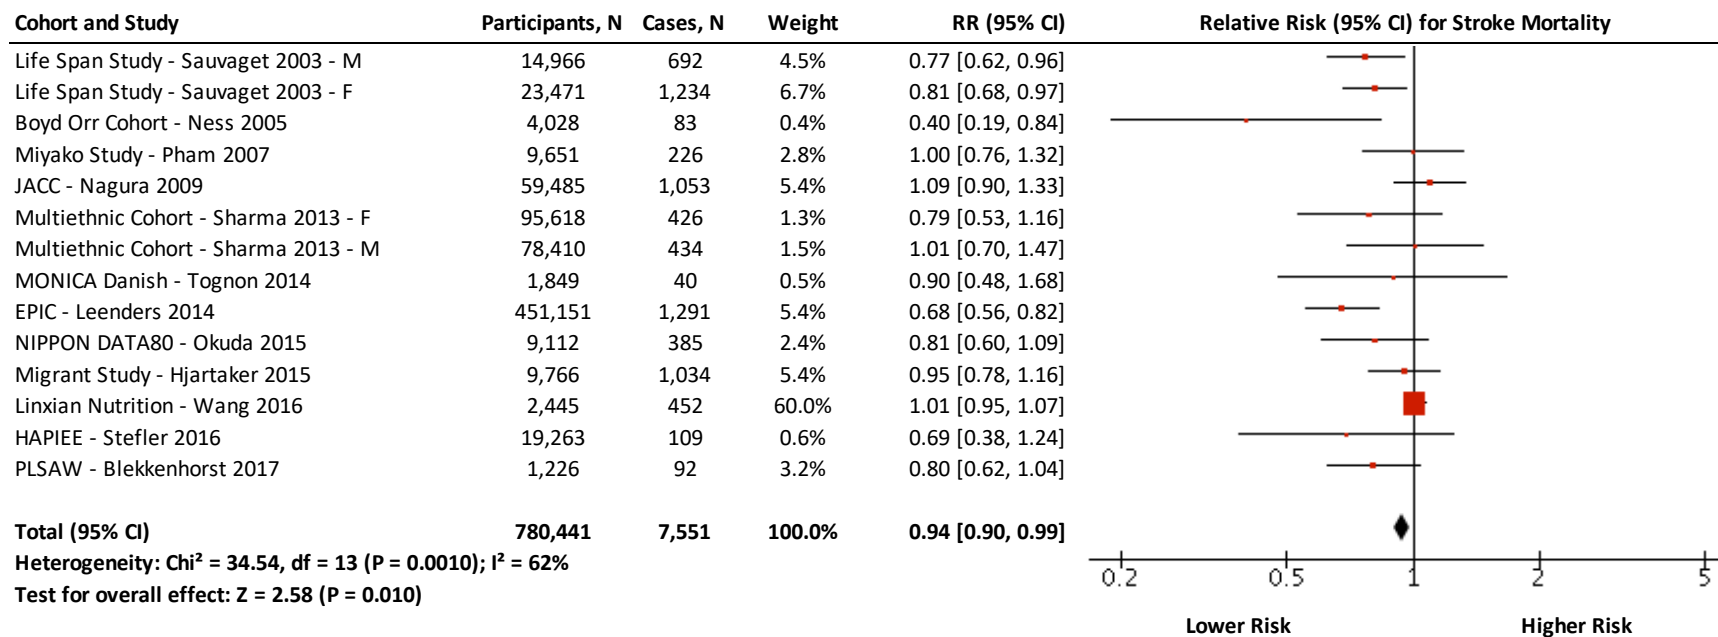



## B. Random Effects

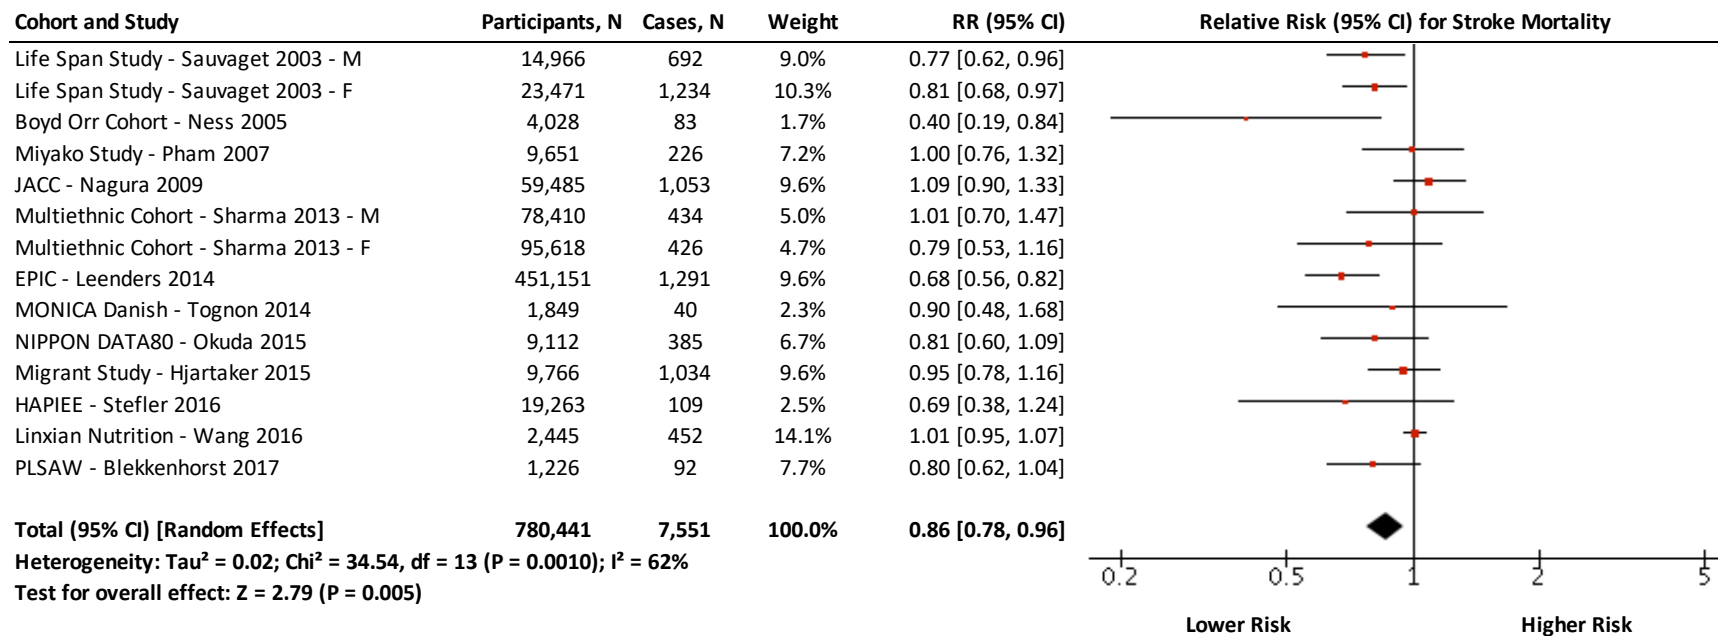

**Figure S132.** Relation between intake of vegetables and stroke mortality (highest vs. lowest level of intake). All results are presented as relative risk (RR) with 95% confidence intervals (95% CI). Pooled risk estimate is represented by the black diamond using (A) fixed effects and (B) random effects models. Inter-study heterogeneity was assessed using the Cochran Q statistic (Chi<sup>2</sup>) at a significance level of p<0.10, and quantified by I<sup>2</sup>, with values ≥ 50% indicating substantial heterogeneity.

### BANANAS AND STROKE MORTALITY

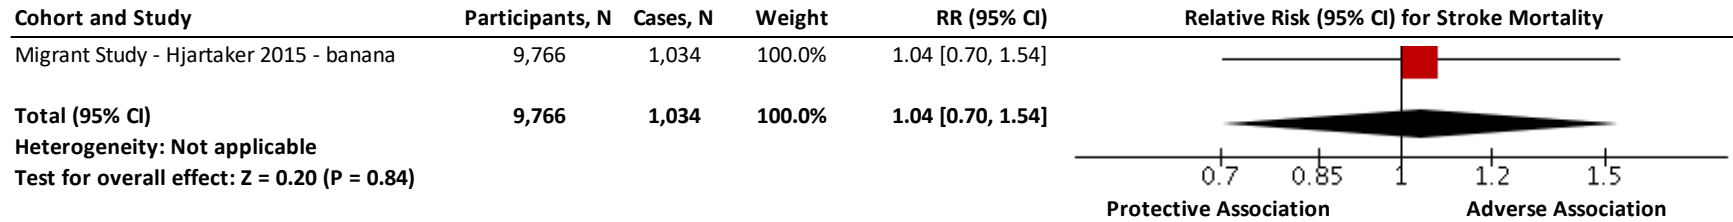

**Figure S133.** Relation between intake of bananas and stroke mortality (highest vs. lowest level of intake). All results are presented as relative risk (RR) with 95% confidence intervals (95% CI). Pooled risk estimate is represented by the black diamond. Inter-study heterogeneity was assessed using the Cochran Q statistic ( $\text{Chi}^2$ ) at a significance level of  $p < 0.10$ , and quantified by  $I^2$ , with values  $\geq 50\%$  indicating substantial heterogeneity.

## BERRIES AND STROKE MORTALITY

### A. Fixed Effects

| Cohort and Study                                                                    | Participants, N | Cases, N     | Weight        | RR (95% CI)              |
|-------------------------------------------------------------------------------------|-----------------|--------------|---------------|--------------------------|
| UK Women's Cohort - Lai 2015                                                        | 30,458          | 148          | 10.7%         | 1.08 [0.65, 1.80]        |
| Migrant Study - Hjartaker 2015                                                      | 9,766           | 1,034        | 89.3%         | 0.96 [0.81, 1.15]        |
| <b>Total (95% CI)</b>                                                               | <b>40,224</b>   | <b>1,182</b> | <b>100.0%</b> | <b>0.97 [0.82, 1.15]</b> |
| <b>Heterogeneity: Chi<sup>2</sup> = 0.19, df = 1 (P = 0.66); I<sup>2</sup> = 0%</b> |                 |              |               |                          |
| <b>Test for overall effect: Z = 0.32 (P = 0.75)</b>                                 |                 |              |               |                          |

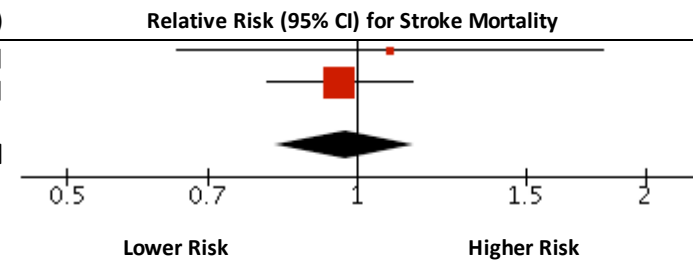

### B. Random Effects

| Cohort and Study                                                                                            | Participants, N | Cases, N     | Weight        | RR (95% CI)              |
|-------------------------------------------------------------------------------------------------------------|-----------------|--------------|---------------|--------------------------|
| UK Women's Cohort - Lai 2015                                                                                | 30,458          | 148          | 10.7%         | 1.08 [0.65, 1.80]        |
| Migrant Study - Hjartaker 2015                                                                              | 9,766           | 1,034        | 89.3%         | 0.96 [0.81, 1.15]        |
| <b>Total (95% CI) [Random Effects]</b>                                                                      | <b>40,224</b>   | <b>1,182</b> | <b>100.0%</b> | <b>0.97 [0.82, 1.15]</b> |
| <b>Heterogeneity: Tau<sup>2</sup> = 0.00; Chi<sup>2</sup> = 0.19, df = 1 (P = 0.66); I<sup>2</sup> = 0%</b> |                 |              |               |                          |
| <b>Test for overall effect: Z = 0.32 (P = 0.75)</b>                                                         |                 |              |               |                          |

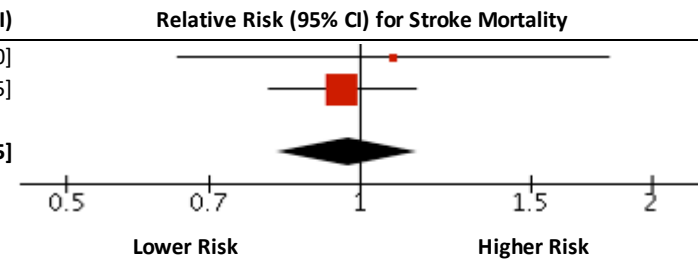

**Figure S134.** Relation between intake of berries and stroke mortality (highest vs. lowest level of intake). All results are presented as relative risk (RR) with 95% confidence intervals (95% CI). Pooled risk estimate is represented by the black diamond. Inter-study heterogeneity was assessed using the Cochran Q statistic (Chi<sup>2</sup>) at a significance level of  $p < 0.10$ , and quantified by I<sup>2</sup>, with values  $\geq 50\%$  indicating substantial heterogeneity.

## CITRUS FRUIT AND STROKE MORTALITY

### A. Fixed Effects

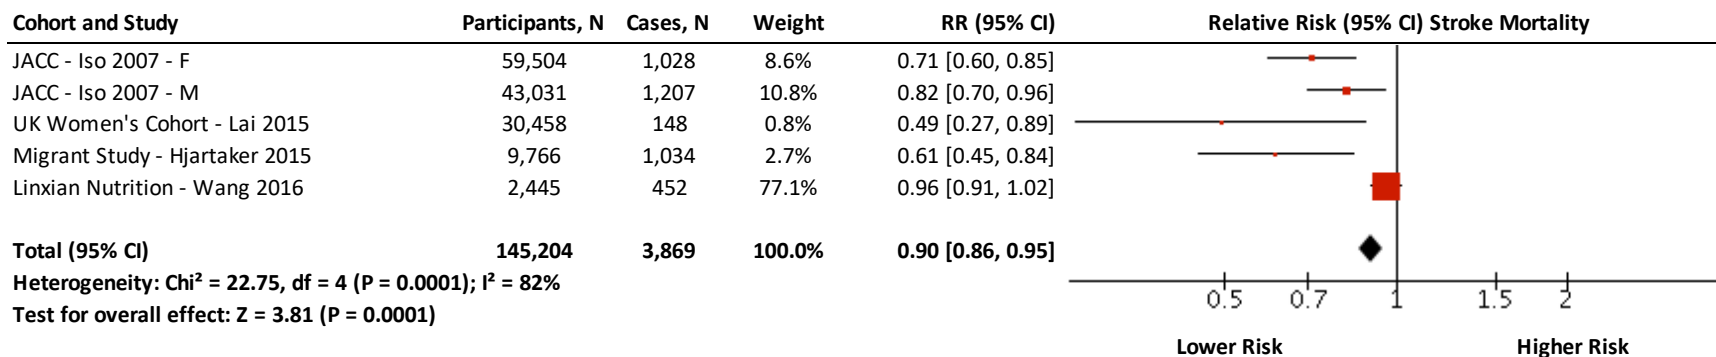

### B. Random Effects

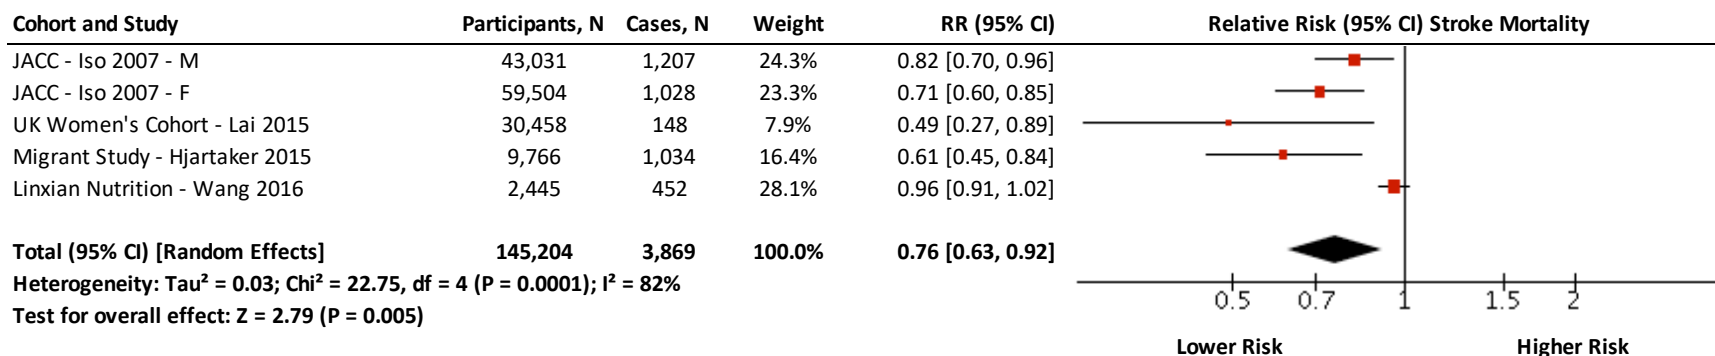

**Figure S135.** Relation between intake of citrus fruit and stroke mortality (highest vs. lowest level of intake). All results are presented as relative risk (RR) with 95% confidence intervals (95% CI). Pooled risk estimate is represented by the black diamond using (A) fixed effects and (B) random effects models. Inter-study heterogeneity was assessed using the Cochran Q statistic ( $\text{Chi}^2$ ) at a significance level of  $p < 0.10$ , and quantified by  $I^2$ , with values  $\geq 50\%$  indicating substantial heterogeneity.

### DRIED FRUIT AND STROKE MORTALITY

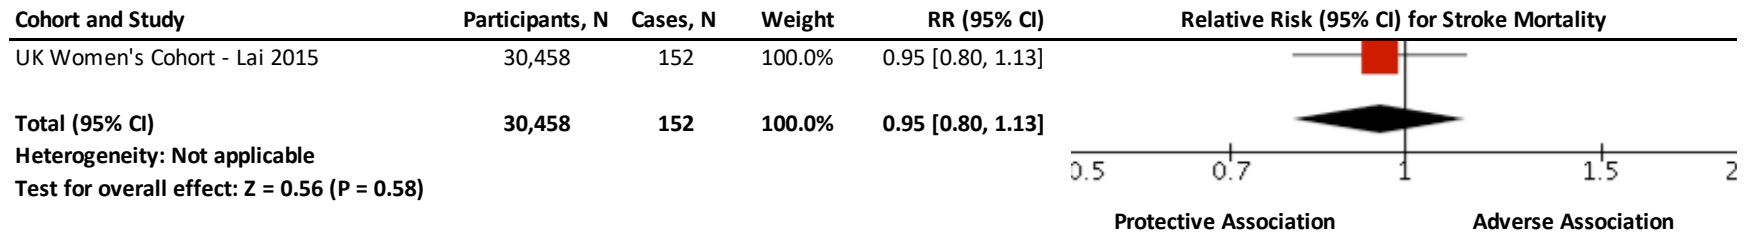

**Figure S136.** Relation between intake of dried fruit and stroke mortality (highest vs. lowest level of intake). All results are presented as relative risk (RR) with 95% confidence intervals (95% CI). Pooled risk estimate is represented by the black diamond. Inter-study heterogeneity was assessed using the Cochran Q statistic (Chi<sup>2</sup>) at a significance level of p<0.10, and quantified by I<sup>2</sup>, with values ≥ 50% indicating substantial heterogeneity.

## FRUIT JUICE AND STROKE MORTALITY

### A. Fixed Effects

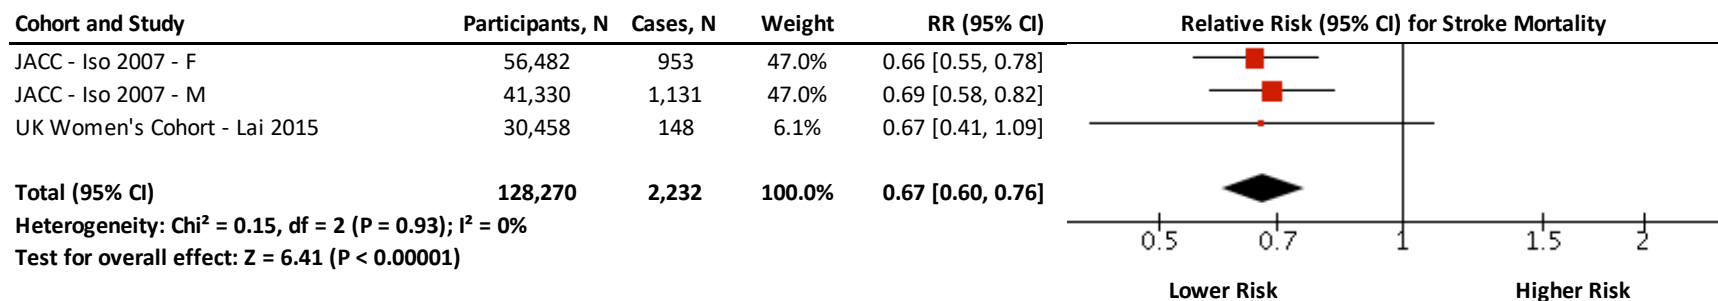

### B. Random Effects

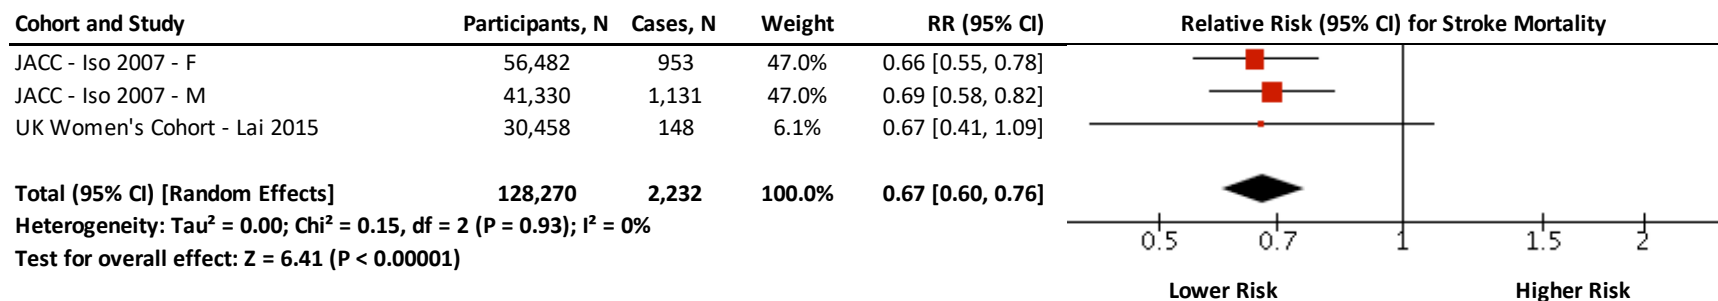

**Figure S137.** Relation between intake of fruit juice and stroke mortality (highest vs. lowest level of intake). All results are presented as relative risk (RR) with 95% confidence intervals (95% CI). Pooled risk estimate is represented by the black diamond using (A) fixed effects and (B) random effects models. Inter-study heterogeneity was assessed using the Cochran Q statistic ( $\text{Chi}^2$ ) at a significance level of  $p < 0.10$ , and quantified by  $I^2$ , with values  $\geq 50\%$  indicating substantial heterogeneity.

## GRAPES AND STROKE MORTALITY

### A. Fixed Effects

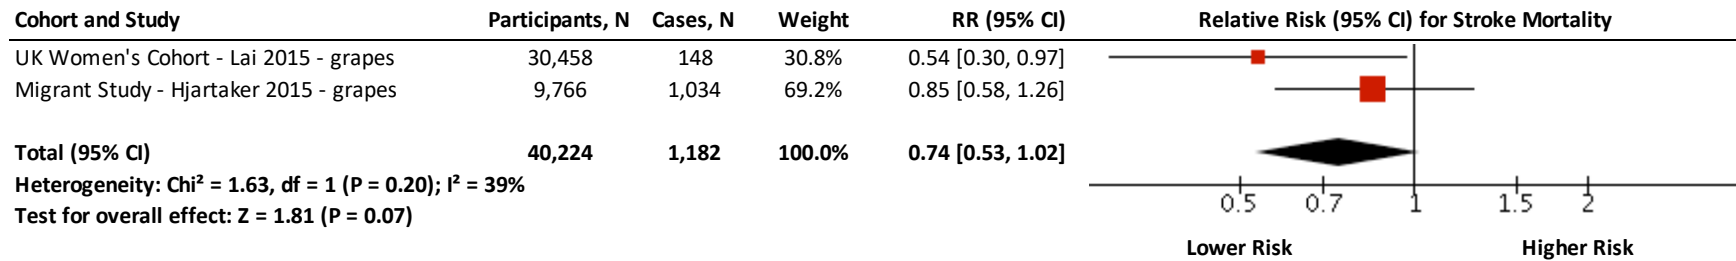

### B. Random Effects

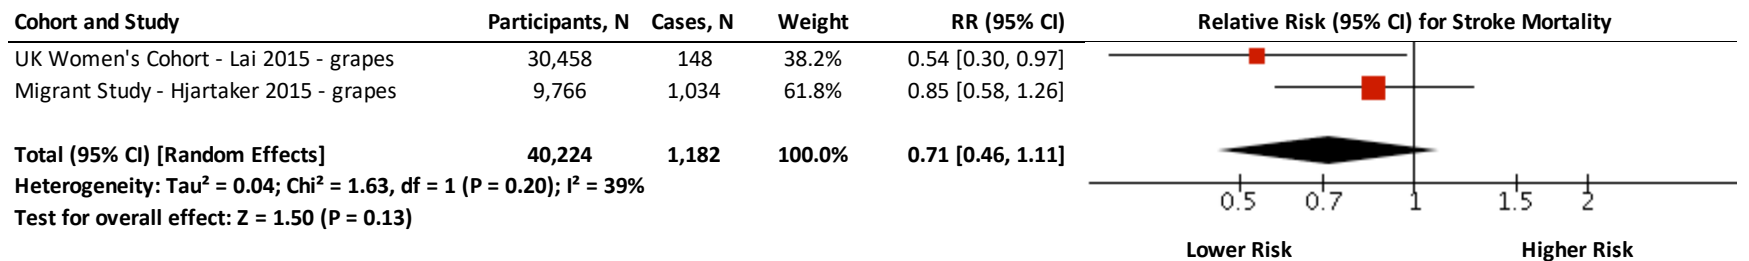

**Figure S138.** Relation between intake of grapes and stroke mortality (highest vs. lowest level of intake). All results are presented as relative risk (RR) with 95% confidence intervals (95% CI). Pooled risk estimate is represented by the black diamond using (A) fixed effects and (B) random effects models. Inter-study heterogeneity was assessed using the Cochran Q statistic ( $\text{Chi}^2$ ) at a significance level of  $p < 0.10$ , and quantified by  $I^2$ , with values  $\geq 50\%$  indicating substantial heterogeneity.

## POMMES AND STROKE MORTALITY

### A. Fixed Effects

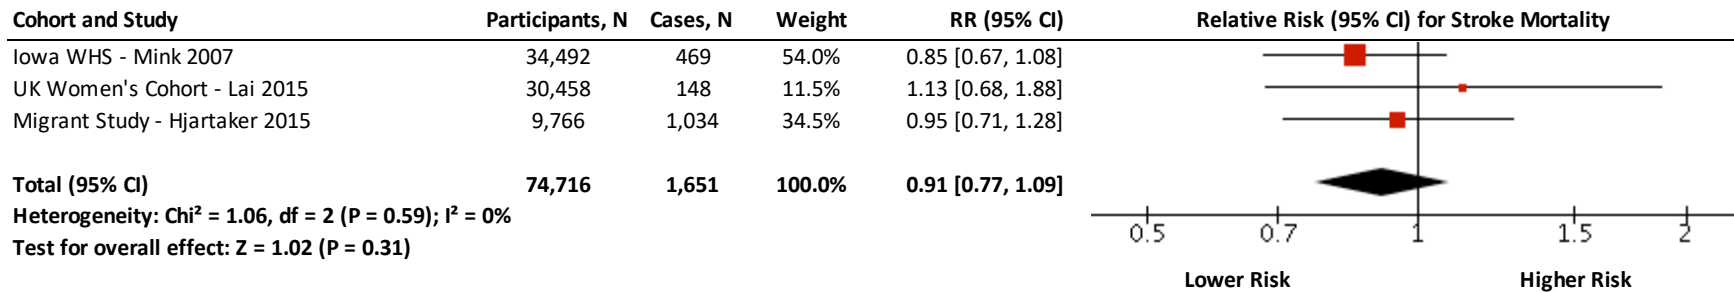

### B. Random Effects

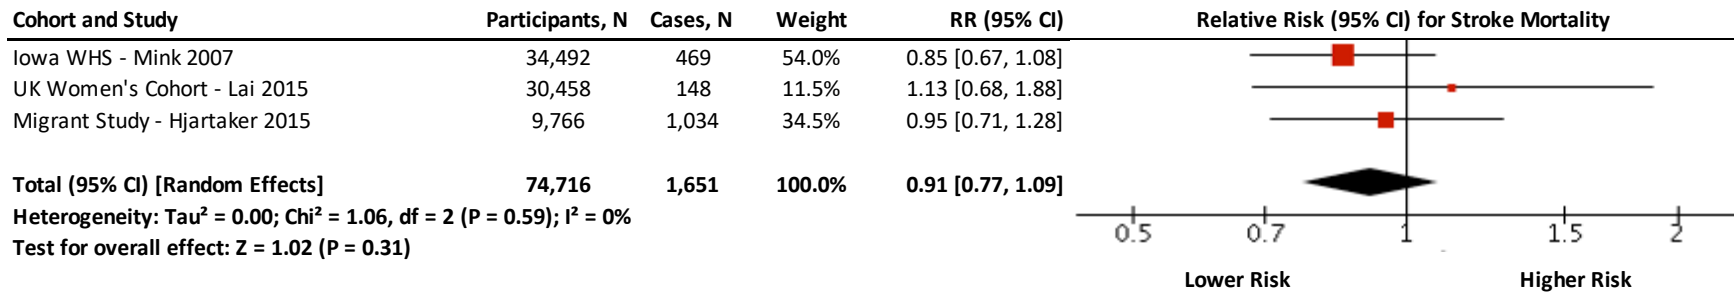

**Figure S139.** Relation between intake of pomes fruit and stroke mortality (highest vs. lowest level of intake). All results are presented as relative risk (RR) with 95% confidence intervals (95% CI). Pooled risk estimate is represented by the black diamond using (A) fixed effects and (B) random effects models. Inter-study heterogeneity was assessed using the Cochran Q statistic ( $\text{Chi}^2$ ) at a significance level of  $p < 0.10$ , and quantified by  $I^2$ , with values  $\geq 50\%$  indicating substantial heterogeneity.



## ALLIUM AND STROKE MORTALITY

### A. Fixed Effects

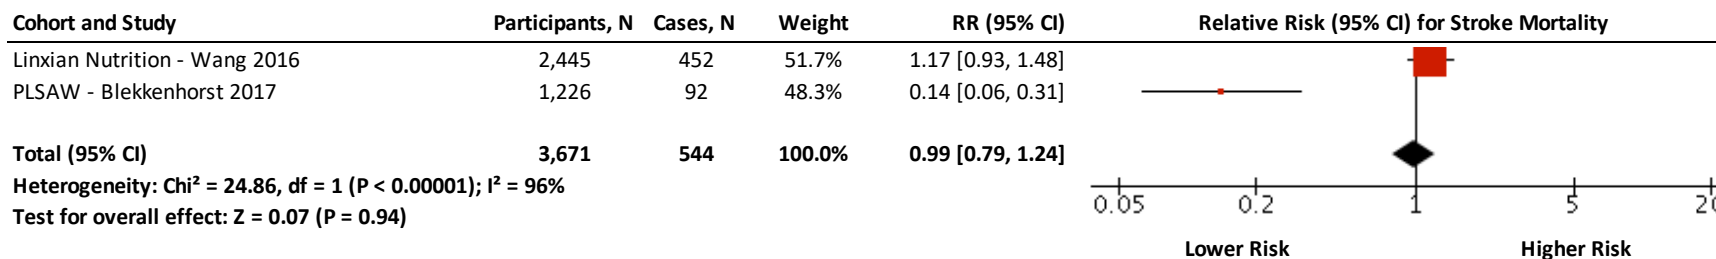

### B. Random Effects

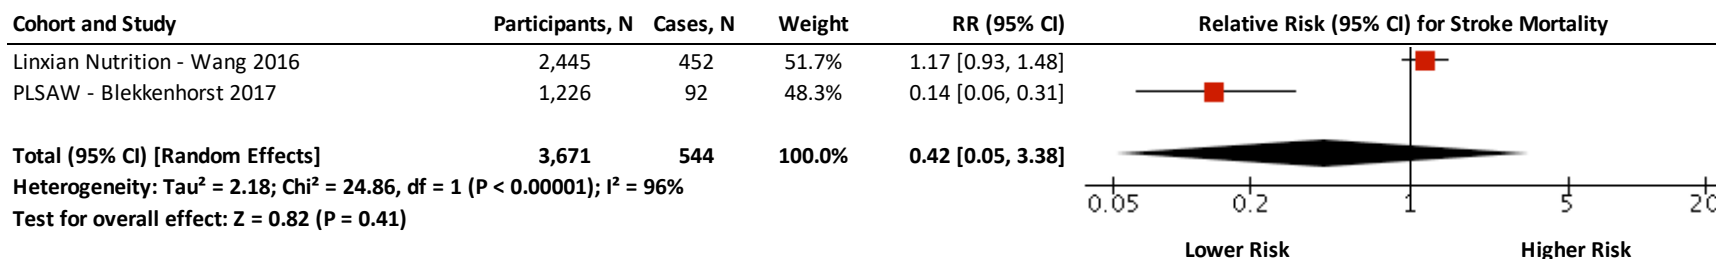

**Figure S140.** Relation between intake of allium vegetables and stroke mortality (highest vs. lowest level of intake). All results are presented as relative risk (RR) with 95% confidence intervals (95% CI). Pooled risk estimate is represented by the black diamond using (A) fixed effects and (B) random effects models. Inter-study heterogeneity was assessed using the Cochran Q statistic ( $\text{Chi}^2$ ) at a significance level of  $p < 0.10$ , and quantified by  $I^2$ , with values  $\geq 50\%$  indicating substantial heterogeneity.

## CARROTS AND STROKE MORTALITY

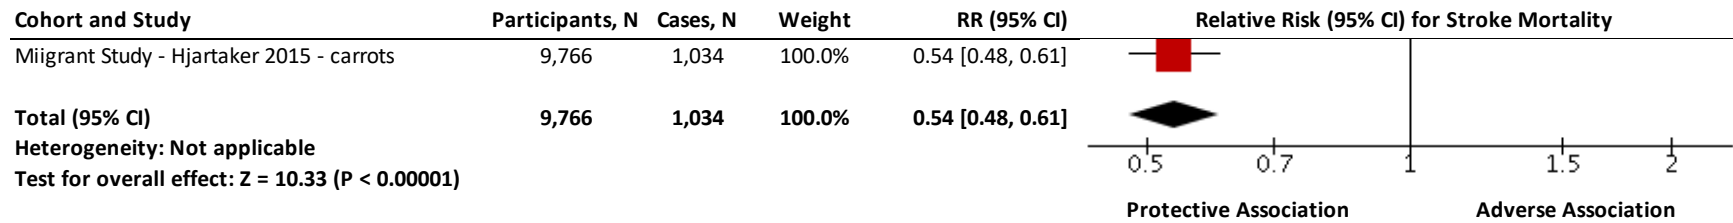

**Figure S141.** Relation between intake of carrots and stroke mortality (highest vs. lowest level of intake). All results are presented as relative risk (RR) with 95% confidence intervals (95% CI). Pooled risk estimate is represented by the black diamond. Inter-study heterogeneity was assessed using the Cochran Q statistic ( $\text{Chi}^2$ ) at a significance level of  $p < 0.10$ , and quantified by  $I^2$ , with values  $\geq 50\%$  indicating substantial heterogeneity.

## CRUCIFEROUS VEGETABLES AND STROKE MORTALITY

### A. Fixed Effects

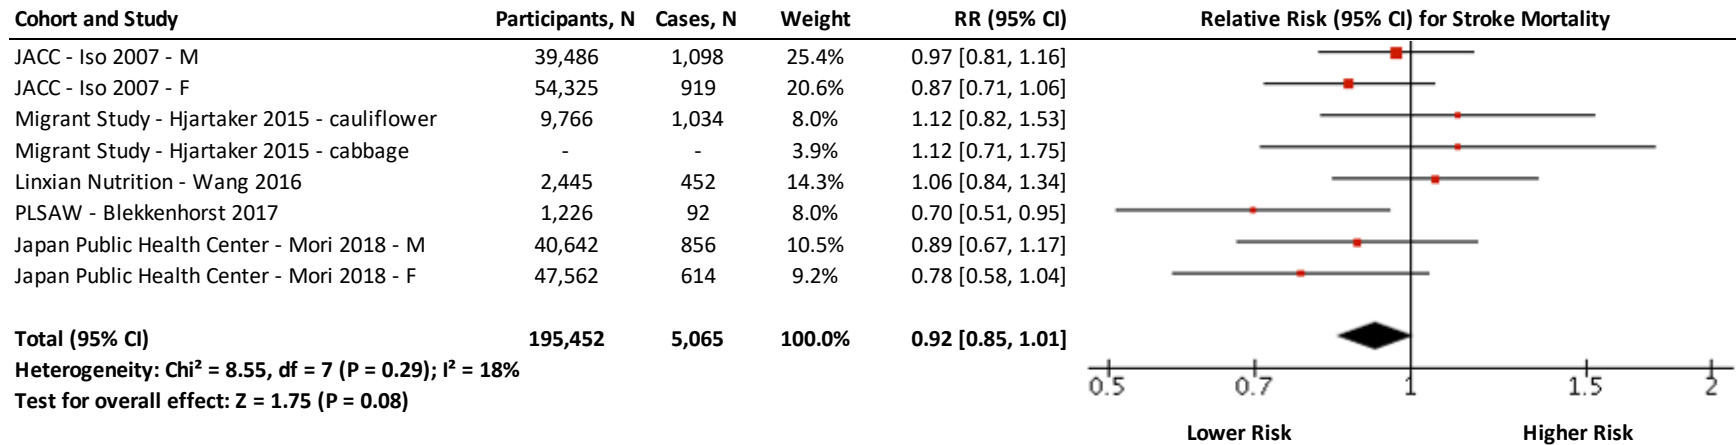

### B. Random Effects

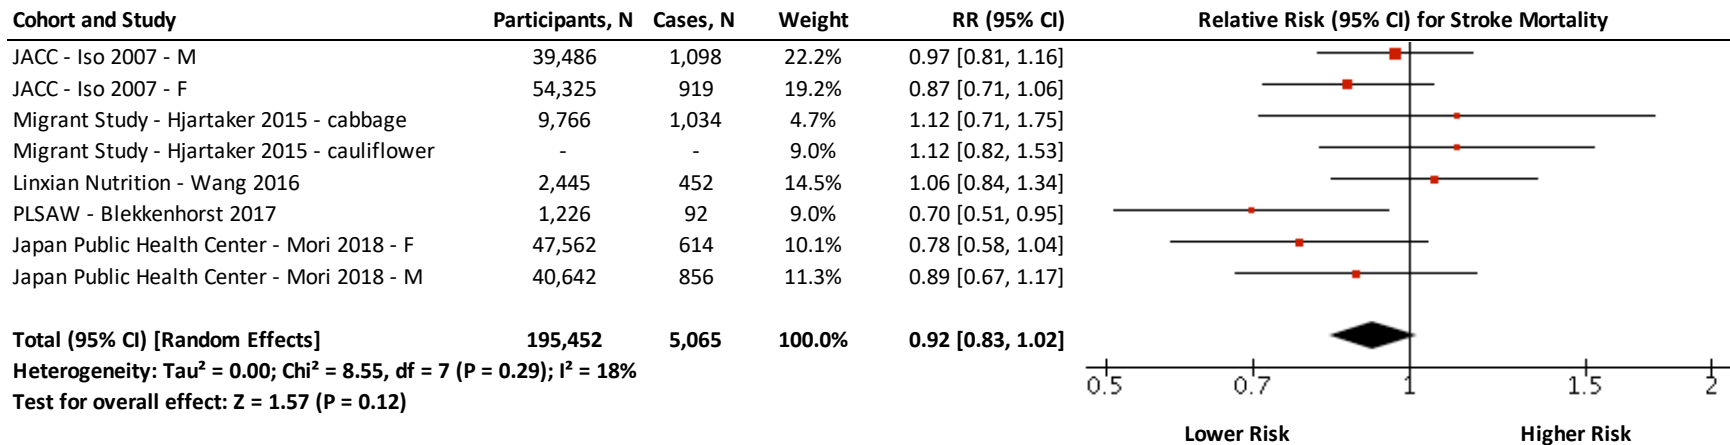

**Figure S142.** Relation between intake of cruciferous vegetables and stroke mortality (highest vs. lowest level of intake). All results are presented as relative risk (RR) with 95% confidence intervals (95% CI). Pooled risk estimate is represented by the black diamond using (A) fixed effects and (B) random effects models. Inter-study heterogeneity was assessed using the Cochran Q statistic ( $\text{Chi}^2$ ) at a significance level of  $p < 0.10$ , and quantified by  $I^2$ , with values  $\geq 50\%$  indicating substantial heterogeneity.

## GREEN LEAFY VEGETABLES AND STROKE MORTALITY

### A. Fixed Effects

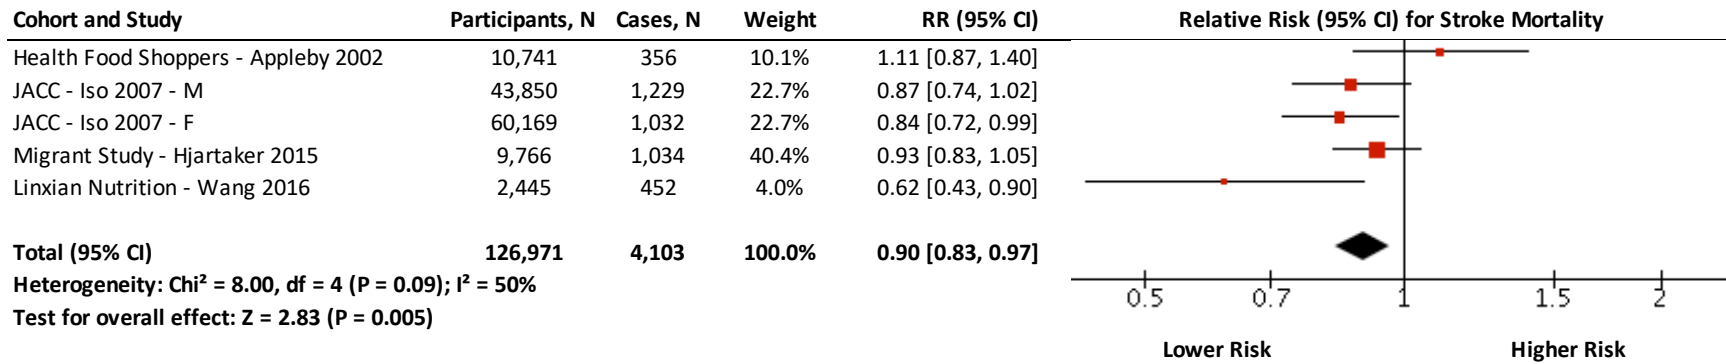

### B. Random Effects

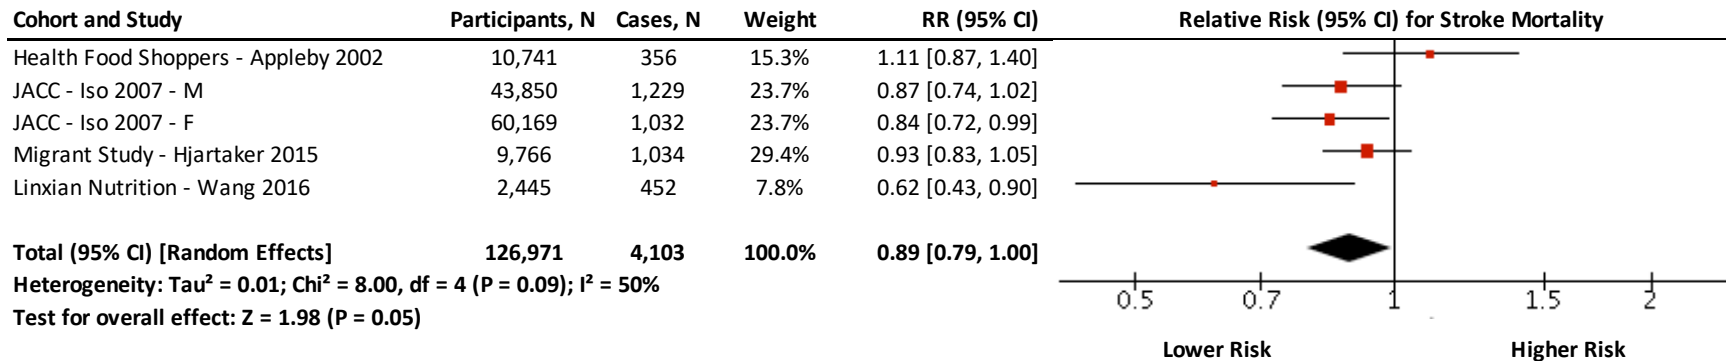

**Figure S143.** Relation between intake of green leafy vegetables and stroke mortality (highest vs. lowest level of intake). All results are presented as relative risk (RR) with 95% confidence intervals (95% CI). Pooled risk estimate is represented by the black diamond using (A) fixed effects and (B) random effects models. Inter-study heterogeneity was assessed using the Cochran Q statistic ( $\text{Chi}^2$ ) at a significance level of  $p < 0.10$ , and quantified by  $I^2$ , with values  $\geq 50\%$  indicating substantial heterogeneity.

## TOMATOES AND STROKE MORTALITY

### A. Fixed Effects

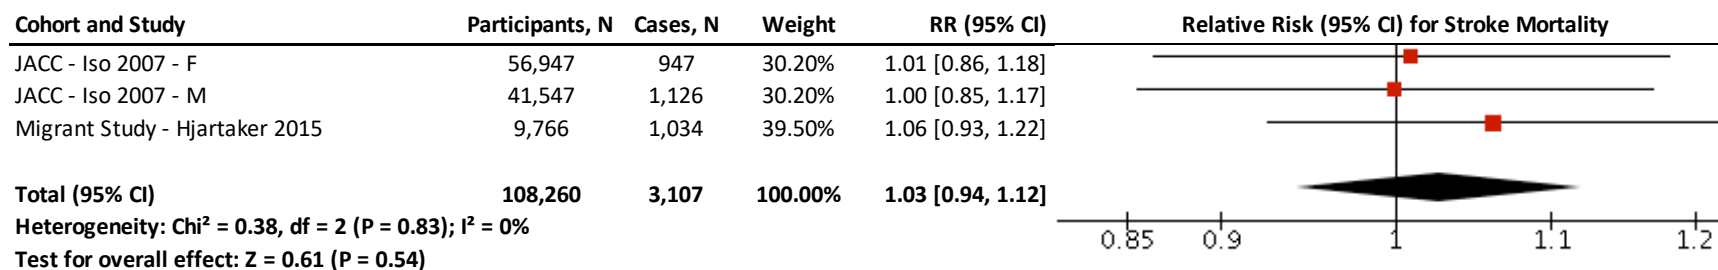

### B. Random Effects

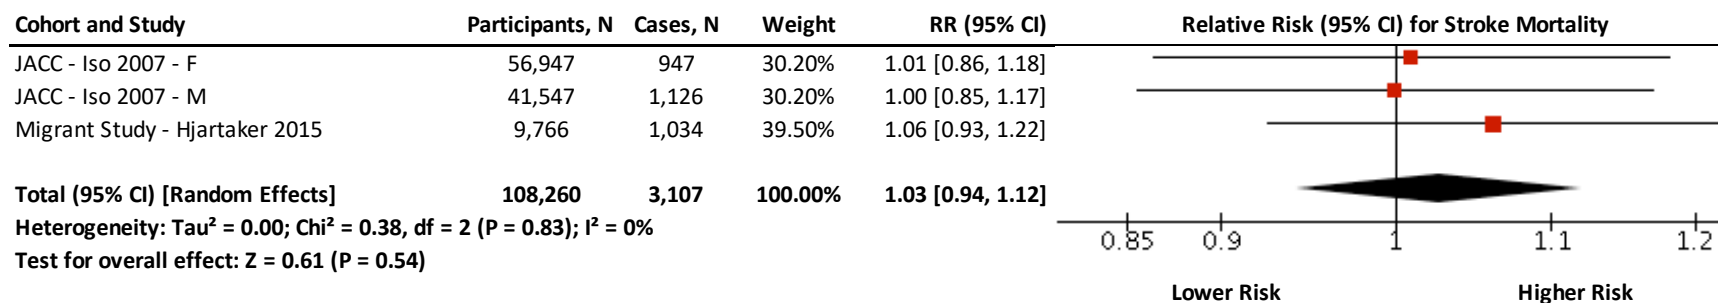

**Figure S144.** Relation between intake of tomatoes and stroke mortality (highest vs. lowest level of intake). All results are presented as relative risk (RR) with 95% confidence intervals (95% CI). Pooled risk estimate is represented by the black diamond using (A) fixed effects and (B) random effects models. Inter-study heterogeneity was assessed using the Cochran Q statistic ( $\text{Chi}^2$ ) at a significance level of  $p < 0.10$ , and quantified by  $I^2$ , with values  $\geq 50\%$  indicating substantial heterogeneity.

## A. Fixed Effects

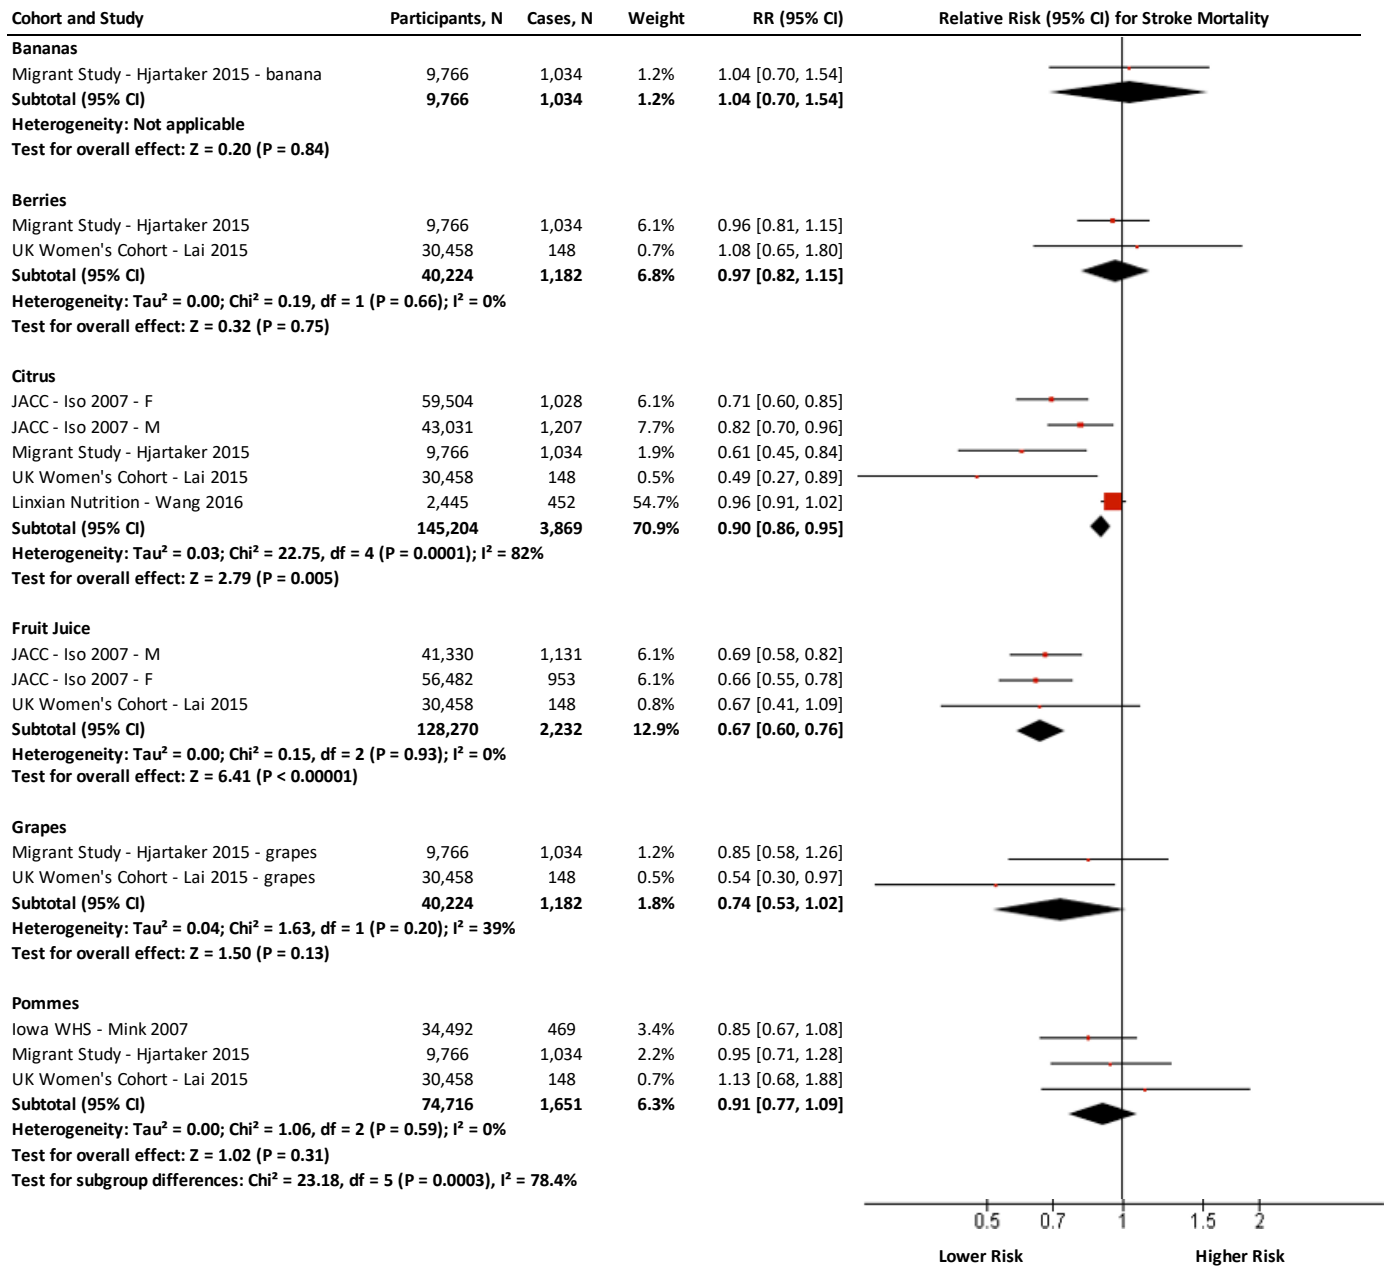

## B. Random Effects

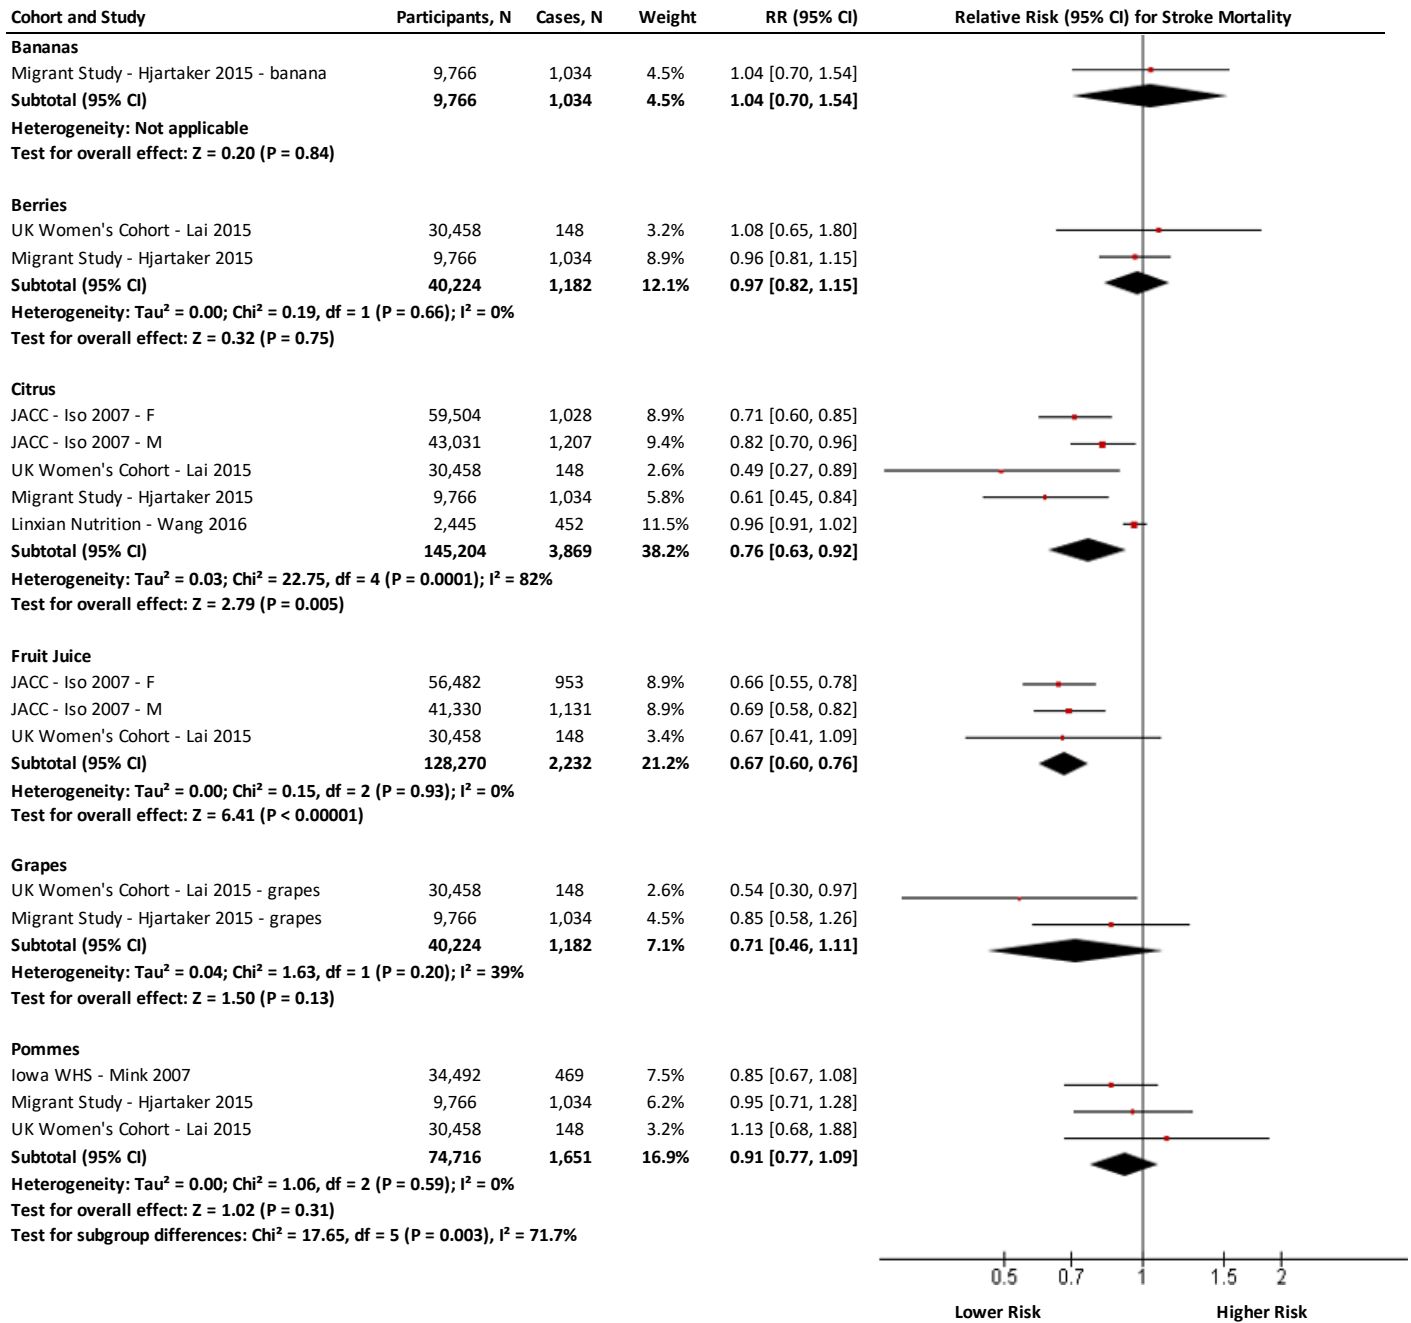

**Figure S145.** Relation between sources of fruit and stroke mortality (highest vs. lowest level of intake). All results are presented as relative risk (RR) with 95% confidence intervals (95% CI). Pooled risk estimate is represented by the black diamond using (A) fixed effects and (B) random effects models. Inter-study heterogeneity was assessed using the Cochran Q statistic (Chi<sup>2</sup>) at a significance level of p<0.10, and quantified by I<sup>2</sup>, with values ≥ 50% indicating substantial heterogeneity.

## A. Fixed Effects

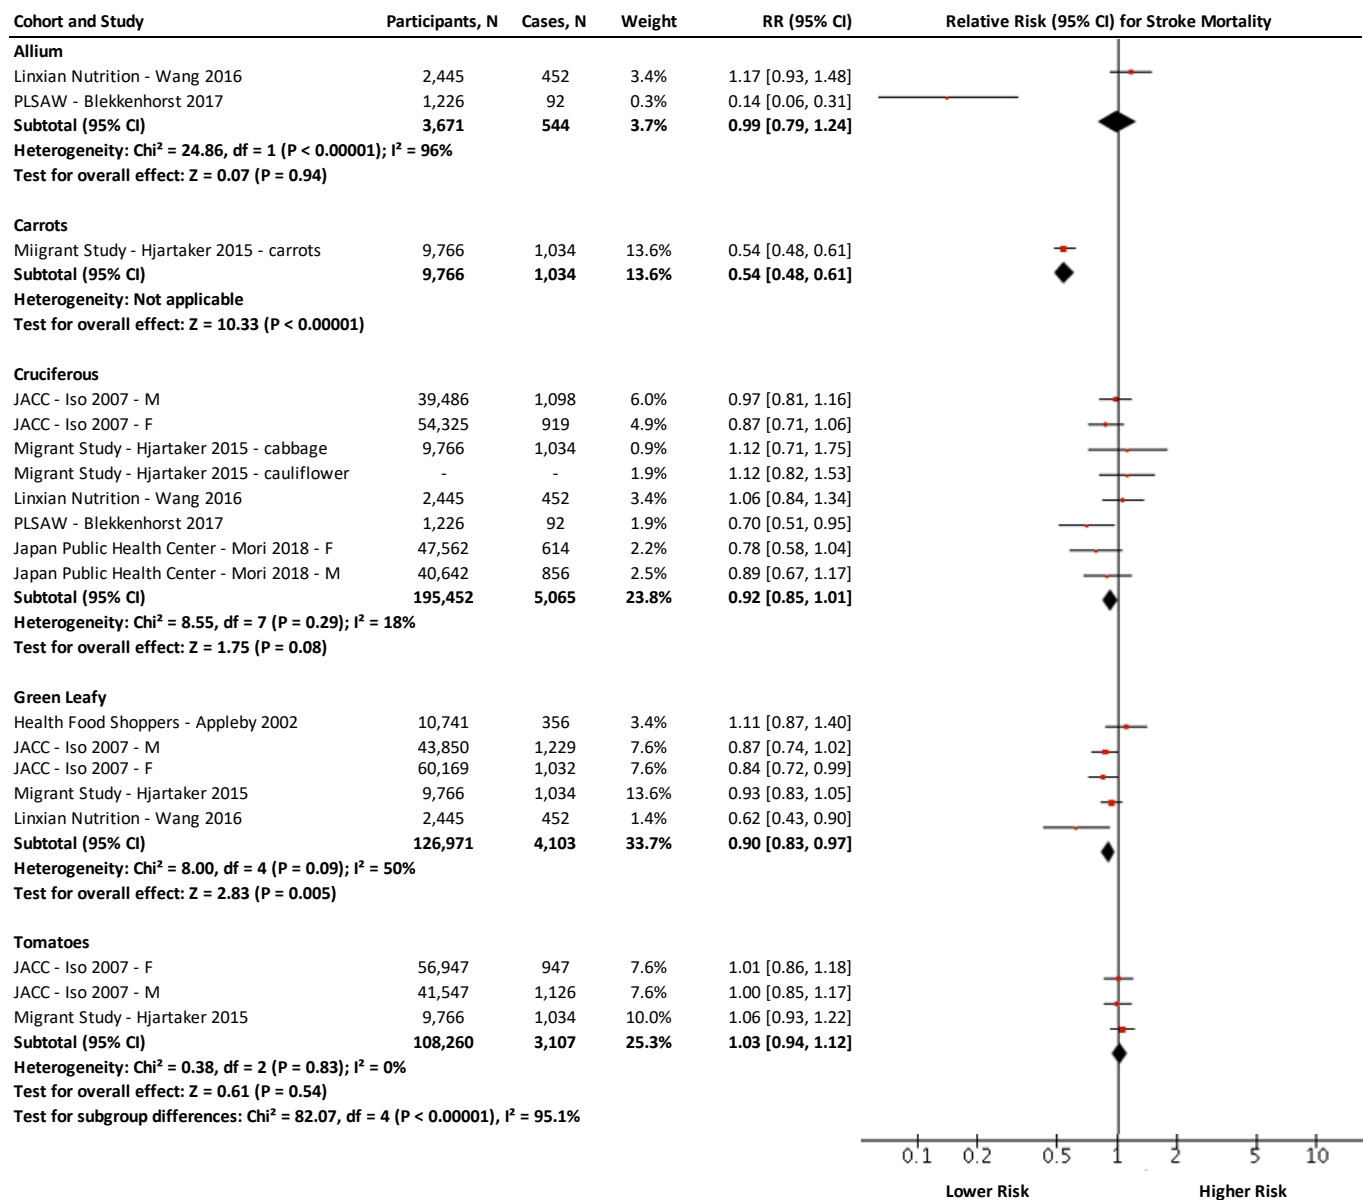



## B. Random Effects

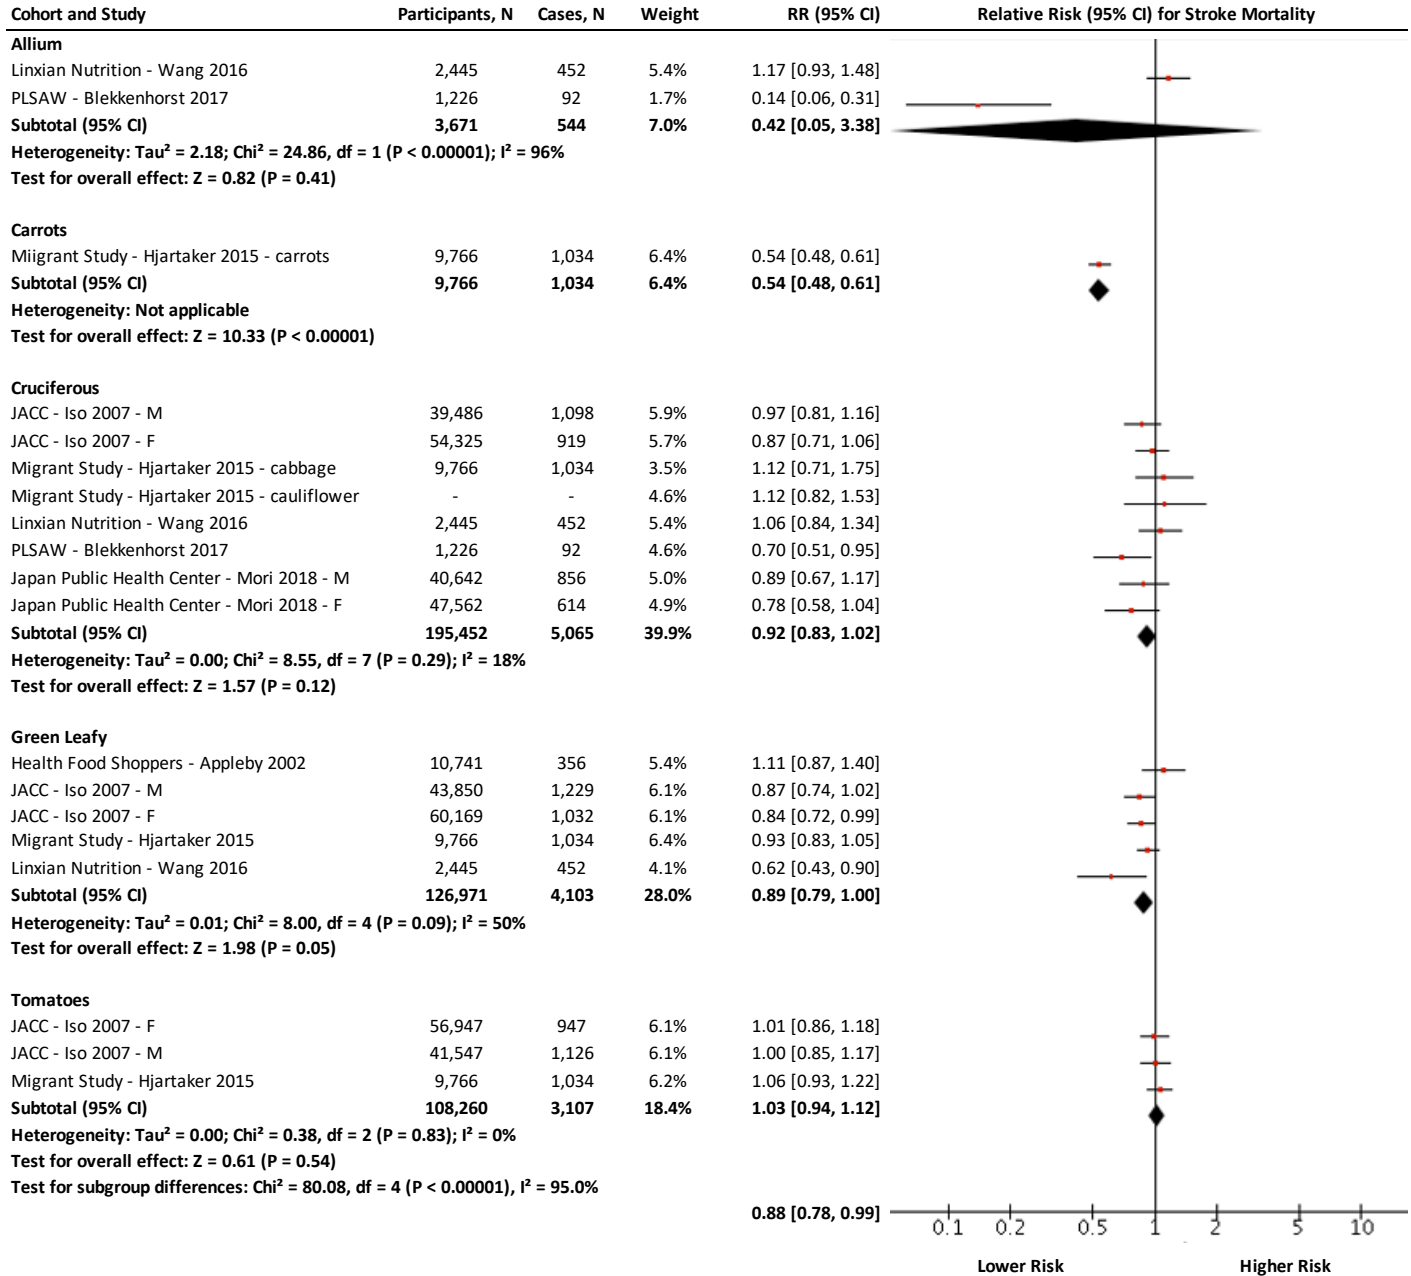

**Figure S146.** Relation between sources of vegetables and stroke mortality (highest vs. lowest level of intake). All results are presented as relative risk (RR) with 95% confidence intervals (95% CI). Pooled risk estimate is represented by the black diamond using (A) fixed effects and (B) random effects models. Inter-study heterogeneity was assessed using the Cochran Q statistic (Chi<sup>2</sup>) at a significance level of p<0.10, and quantified by I<sup>2</sup>, with values ≥ 50% indicating substantial heterogeneity.

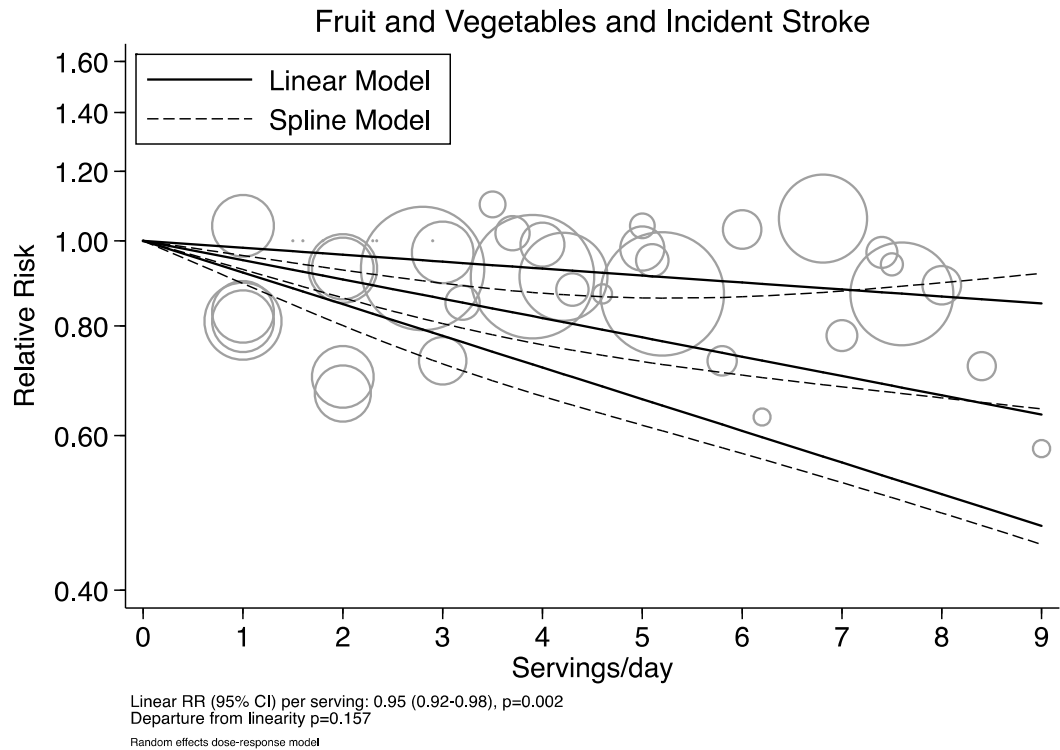

**Figure S147.** Linear and cubic-spline dose-response relation between increasing fruit and vegetable intake and incidence of stroke. Linear dose-response data was modeled using the Greenland and Longnecker<sup>23</sup> method to estimate the covariances of multivariable-adjusted relative risk. Cubic spline data were modeled with fixed-effects restricted cubic spline with 3 knots and using the Greenland and Longnecker<sup>23</sup> method to estimate the covariances of multivariable-adjusted relative risk. All data was kept on the original dose scale. The fitted trend for each model is represented by a central line (solid lines for linear model; dashed lines for cubic spline model) with 95% confidence intervals represented by the outer lines. Individual observations are represented by the circles, with the weight of the study in the overall analysis represented by the size of the circles.

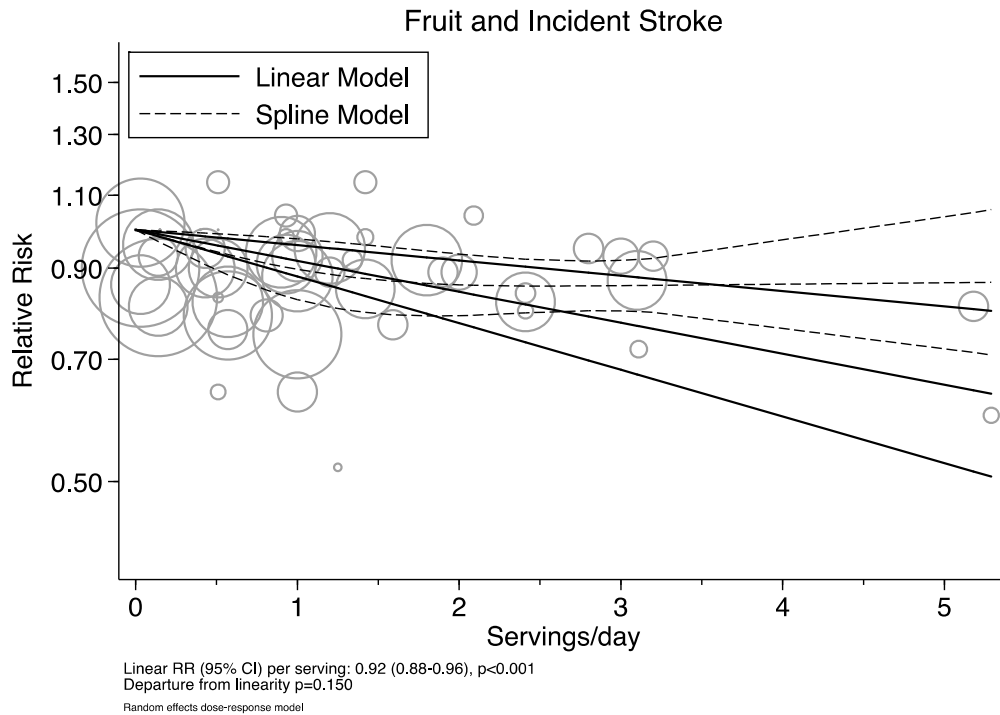

**Figure S148.** Linear and cubic-spline dose-response relation between increasing fruit intake and incidence of stroke. Linear dose-response data was modeled using the Greenland and Longnecker<sup>23</sup> method to estimate the covariances of multivariable-adjusted relative risk. Cubic spline data were modeled with fixed-effects restricted cubic spline with 3 knots and using the Greenland and Longnecker<sup>23</sup> method to estimate the covariances of multivariable-adjusted relative risk. All data was kept on the original dose scale. The fitted trend for each model is represented by a central line (solid lines for linear model; dashed lines for cubic spline model) with 95% confidence intervals represented by the outer lines. Individual observations are represented by the circles, with the weight of the study in the overall analysis represented by the size of the circles.

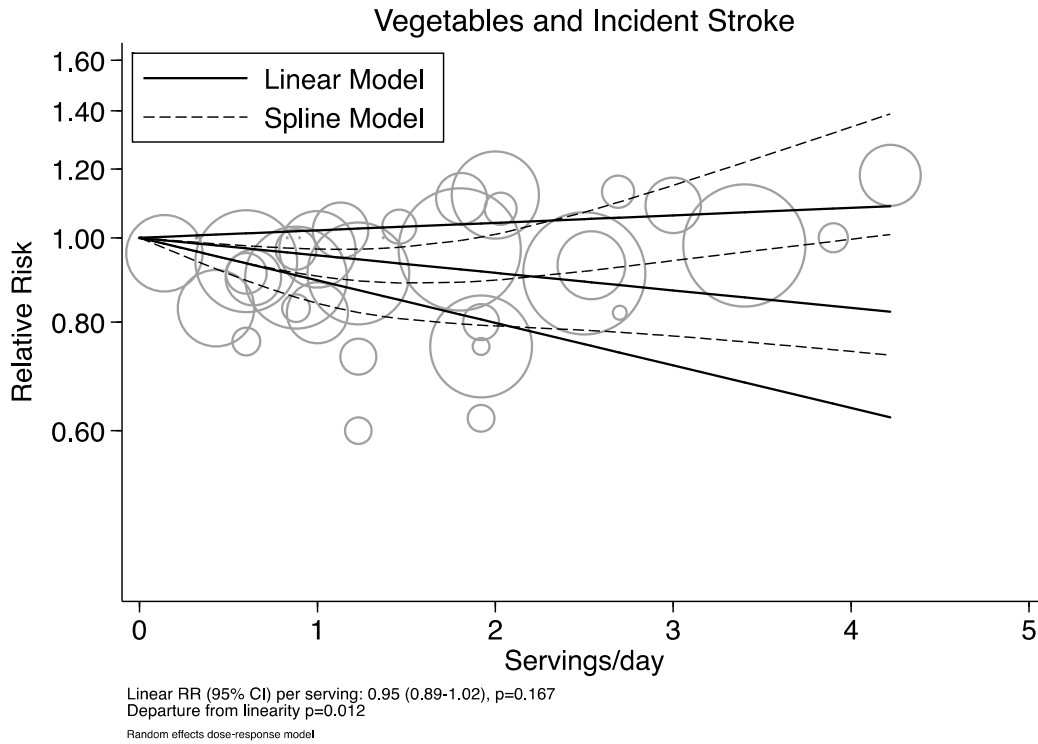

**Figure S149.** Linear and cubic-spline dose-response relation between increasing intake of vegetables and incidence of stroke. Linear dose-response data was modeled using the Greenland and Longnecker<sup>23</sup> method to estimate the covariances of multivariable-adjusted relative risk. Cubic spline data were modeled with fixed-effects restricted cubic spline with 3 knots and using the Greenland and Longnecker<sup>23</sup> method to estimate the covariances of multivariable-adjusted relative risk. All data was kept on the original dose scale. The fitted trend for each model is represented by a central line (solid lines for linear model; dashed lines for cubic spline model) with 95% confidence intervals represented by the outer lines. Individual observations are represented by the circles, with the weight of the study in the overall analysis represented by the size of the circles.

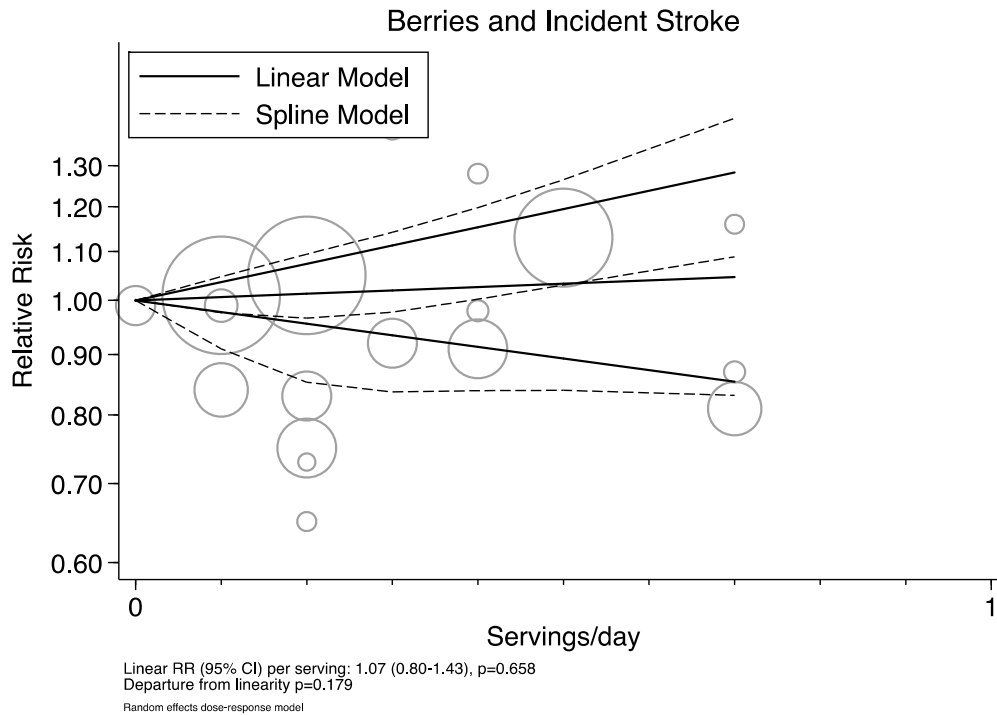

**Figure S150.** Linear and cubic-spline dose-response relation between increasing berries intake and incidence of stroke. Linear dose-response data was modeled using the Greenland and Longnecker<sup>23</sup> method to estimate the covariances of multivariable-adjusted relative risk. Cubic spline data were modeled with fixed-effects restricted cubic spline with 3 knots and using the Greenland and Longnecker<sup>23</sup> method to estimate the covariances of multivariable-adjusted relative risk. All data was kept on the original dose scale. The fitted trend for each model is represented by a central line (solid lines for linear model; dashed lines for cubic spline model) with 95% confidence intervals represented by the outer lines. Individual observations are represented by the circles, with the weight of the study in the overall analysis represented by the size of the circles.

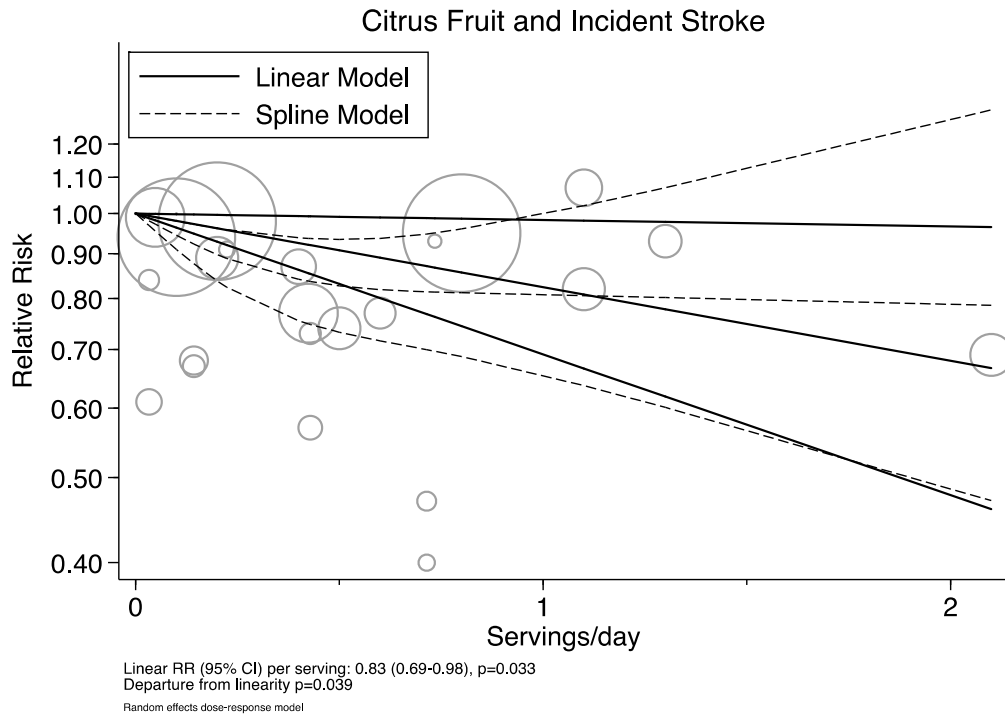

**Figure S151.** Linear and cubic-spline dose-response relation between increasing citrus fruit intake and incidence of stroke. Linear dose-response data was modeled using the Greenland and Longnecker<sup>23</sup> method to estimate the covariances of multivariable-adjusted relative risk. Cubic spline data were modeled with fixed-effects restricted cubic spline with 3 knots and using the Greenland and Longnecker<sup>23</sup> method to estimate the covariances of multivariable-adjusted relative risk. All data was kept on the original dose scale. The fitted trend for each model is represented by a central line (solid lines for linear model; dashed lines for cubic spline model) with 95% confidence intervals represented by the outer lines. Individual observations are represented by the circles, with the weight of the study in the overall analysis represented by the size of the circles.

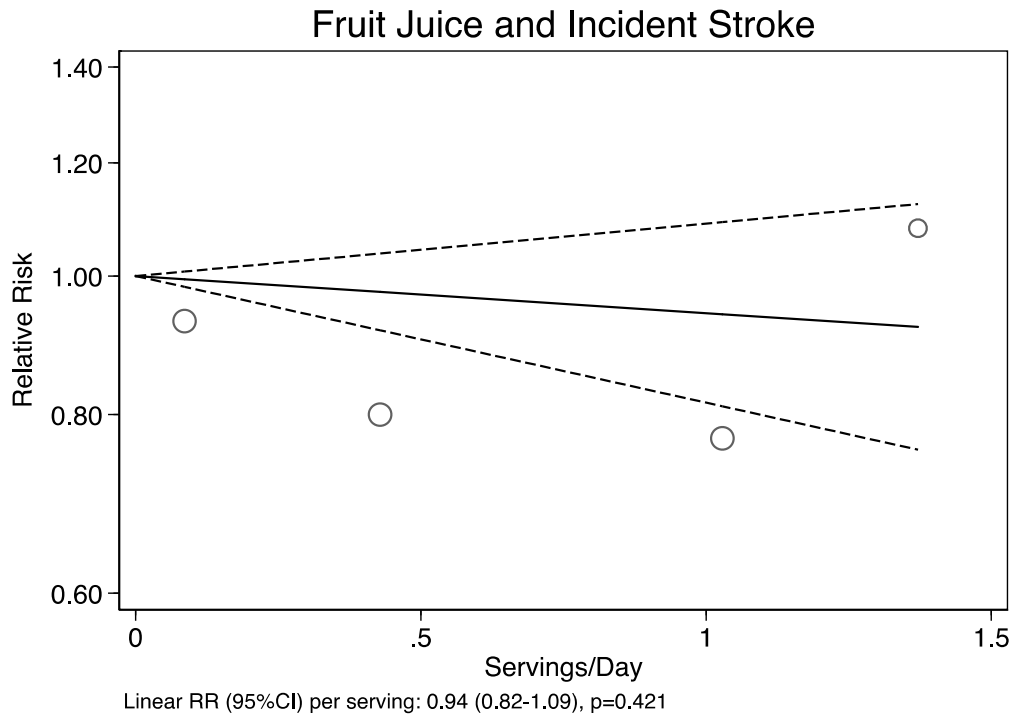

**Figure S152.** Linear and cubic-spline dose-response relation between increasing fruit juice intake and incidence of stroke. Linear dose-response data was modeled using the Greenland and Longnecker<sup>23</sup> method to estimate the covariances of multivariable-adjusted relative risk. Cubic spline data were modeled with fixed-effects restricted cubic spline with 3 knots and using the Greenland and Longnecker<sup>23</sup> method to estimate the covariances of multivariable-adjusted relative risk. All data was kept on the original dose scale. The fitted trend for each model is represented by a central line (solid lines for linear model; dashed lines for cubic spline model) with 95% confidence intervals represented by the outer lines. Individual observations are represented by the circles, with the weight of the study in the overall analysis represented by the size of the circles.

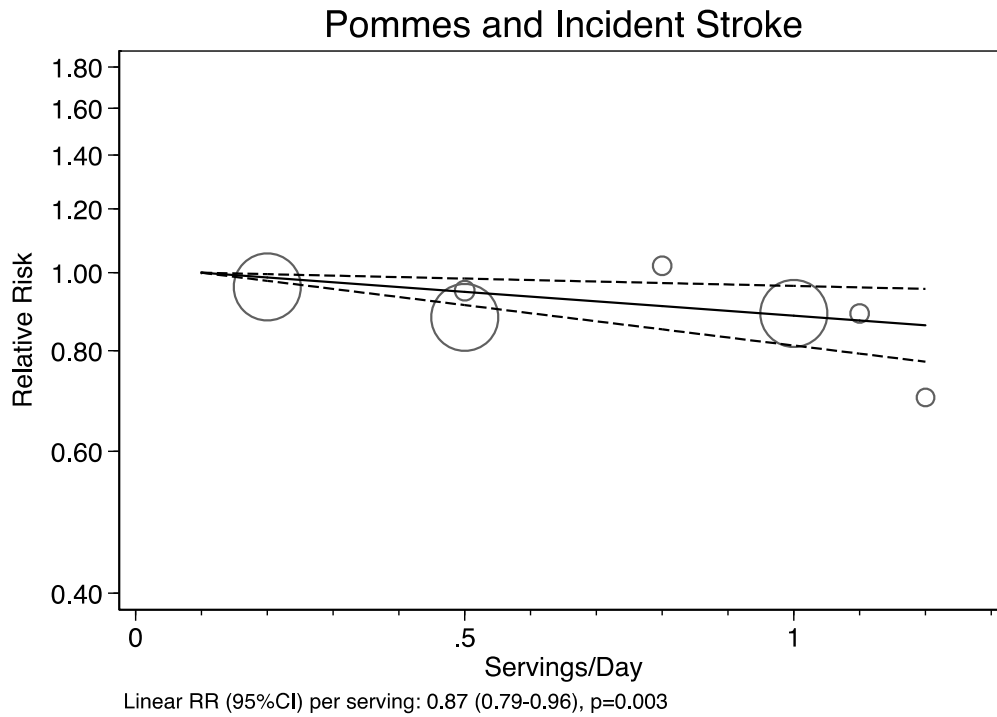

**Figure S153.** Linear dose-response relation between increasing pommes intake and incidence of stroke. Linear dose-response data was modeled using the Greenland and Longnecker<sup>23</sup> method to estimate the covariances of multivariable-adjusted relative risk, with kept on the original dose scale. Dashed lines represent the pointwise 95% confidence intervals for the fitted linear trend represented by a solid line. Individual observations are represented by the circles, with the weight of the study in the overall analysis represented by the size of the circles.



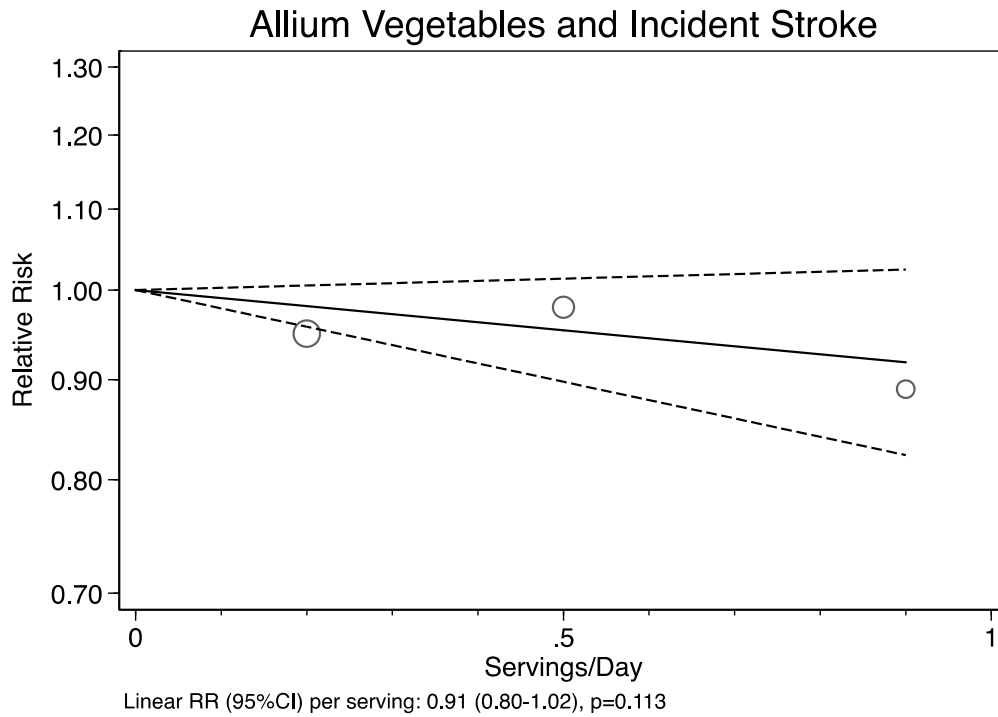

**Figure S154** Linear dose-response relation between increasing intake of allium vegetables and incidence of stroke. Linear dose-response data was modeled using the Greenland and Longnecker<sup>23</sup> method to estimate the covariances of multivariable-adjusted relative risk, with kept on the original dose scale. Dashed lines represent the pointwise 95% confidence intervals for the fitted linear trend represented by a solid line. Individual observations are represented by the circles, with the weight of the study in the overall analysis represented by the size of the circles.

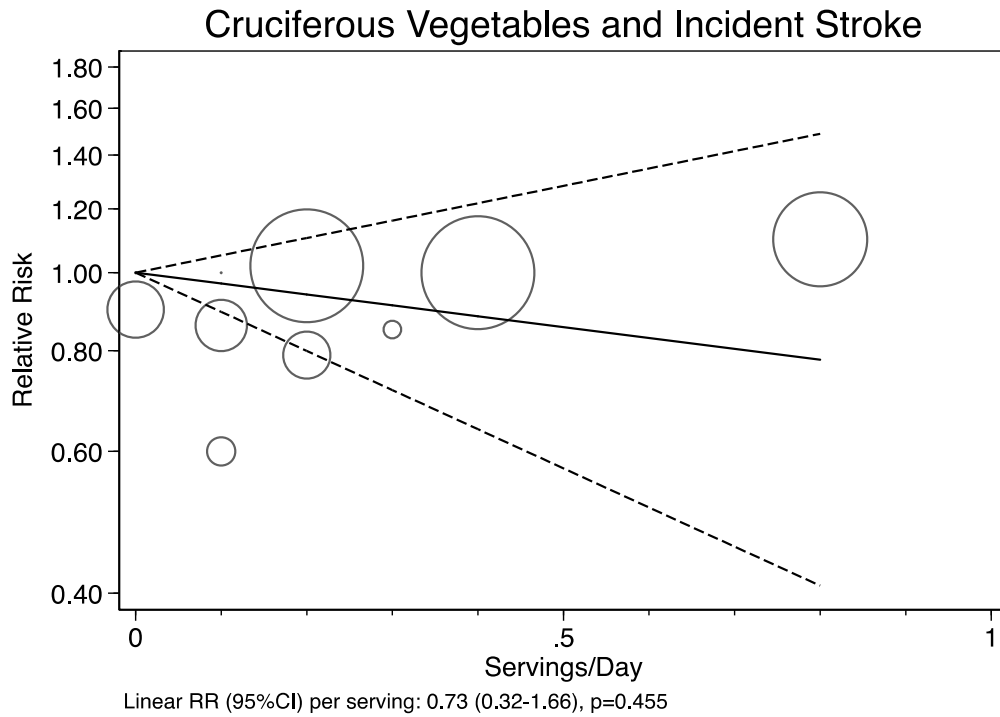

**Figure S155.** Linear dose-response relation between increasing intake of cruciferous vegetables and incidence of stroke. Linear dose-response data was modeled using the Greenland and Longnecker<sup>23</sup> method to estimate the covariances of multivariable-adjusted relative risk, with kept on the original dose scale. Dashed lines represent the pointwise 95% confidence intervals for the fitted linear trend represented by a solid line. Individual observations are represented by the circles, with the weight of the study in the overall analysis represented by the size of the circles.

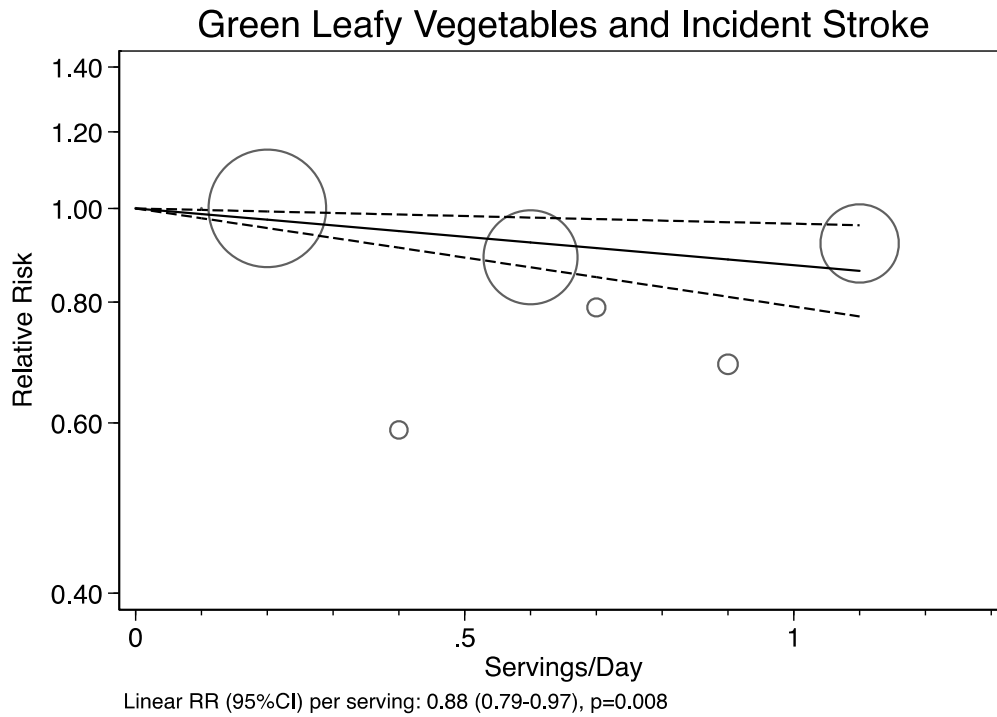

**Figure S156.** Linear dose-response relation between increasing intake of green leafy vegetables and incidence of stroke. Linear dose-response data was modeled using the Greenland and Longnecker<sup>23</sup> method to estimate the covariances of multivariable-adjusted relative risk, with kept on the original dose scale. Dashed lines represent the pointwise 95% confidence intervals for the fitted linear trend represented by a solid line. Individual observations are represented by the circles, with the weight of the study in the overall analysis represented by the size of the circles.

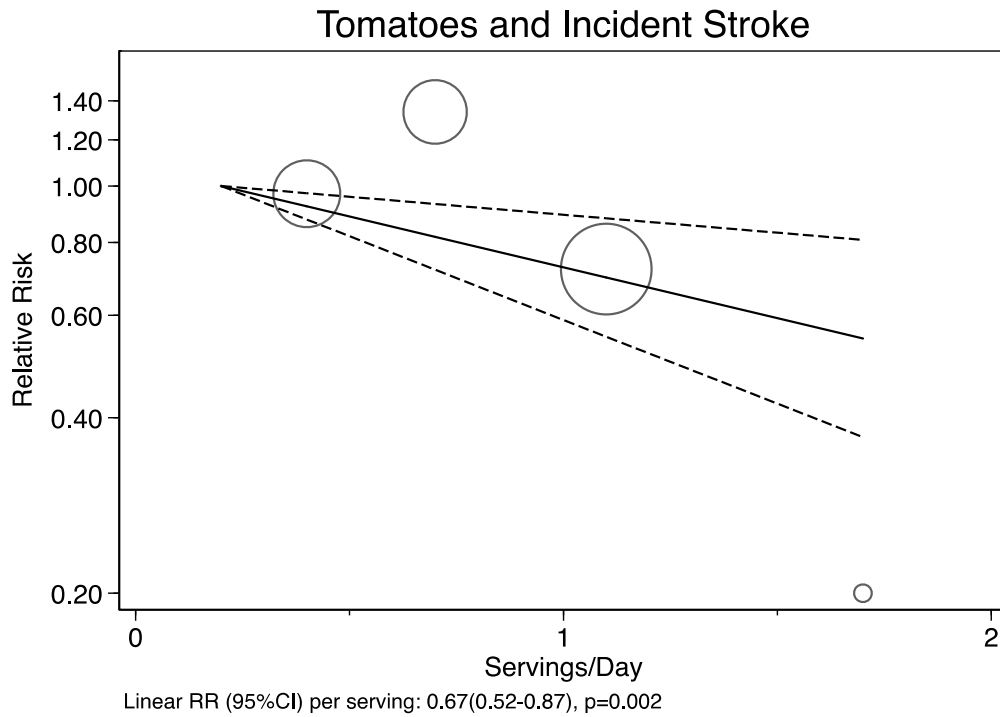

**Figure S157.** Linear dose-response relation between increasing tomato intake and incidence of stroke. Linear dose-response data was modeled using the Greenland and Longnecker<sup>23</sup> method to estimate the covariances of multivariable-adjusted relative risk, with kept on the original dose scale. Dashed lines represent the pointwise 95% confidence intervals for the fitted linear trend represented by a solid line. Individual observations are represented by the circles, with the weight of the study in the overall analysis represented by the size of the circles.

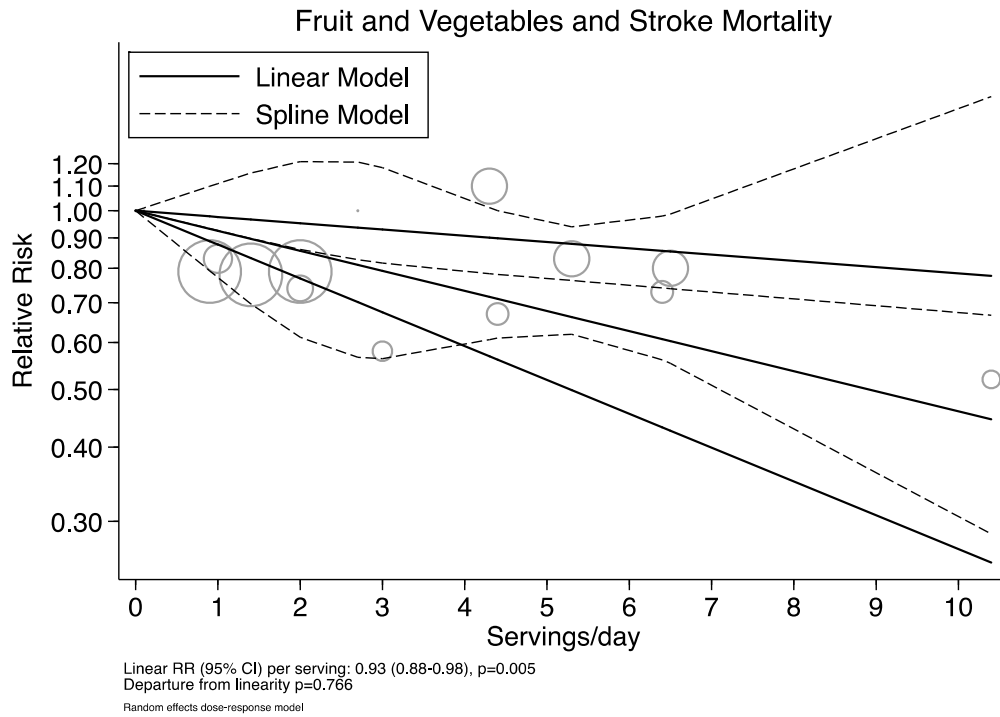

**Figure S158.** Linear dose-response relation between increasing fruit and vegetable intake and stroke mortality. Linear dose-response data was modeled using the Greenland and Longnecker<sup>23</sup> method to estimate the covariances of multivariable-adjusted relative risk, with kept on the original dose scale. Dashed lines represent the pointwise 95% confidence intervals for the fitted linear trend represented by a solid line. Individual observations are represented by the circles, with the weight of the study in the overall analysis represented by the size of the circles.

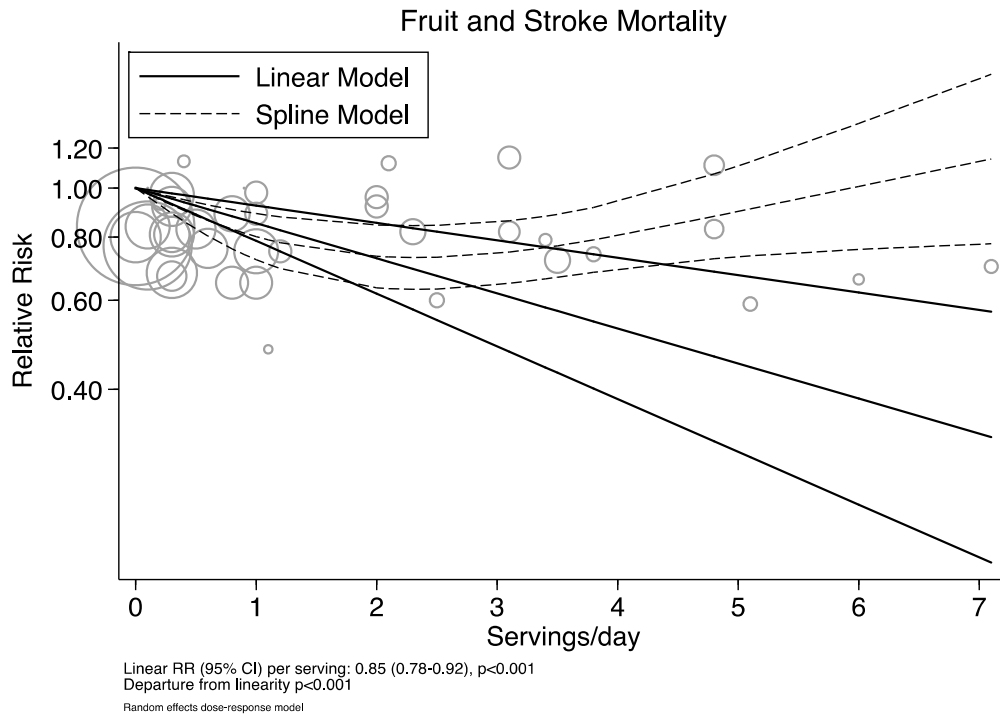

**Figure S159.** Linear and cubic-spline dose-response relation between increasing fruit intake and stroke mortality. Linear dose-response data was modeled using the Greenland and Longnecker<sup>23</sup> method to estimate the covariances of multivariable-adjusted relative risk. Cubic spline data were modeled with fixed-effects restricted cubic spline with 3 knots and using the Greenland and Longnecker<sup>23</sup> method to estimate the covariances of multivariable-adjusted relative risk. All data was kept on the original dose scale. The fitted trend for each model is represented by a central line (solid lines for linear model; dashed lines for cubic spline model) with 95% confidence intervals represented by the outer lines. Individual observations are represented by the circles, with the weight of the study in the overall analysis represented by the size of the circles.

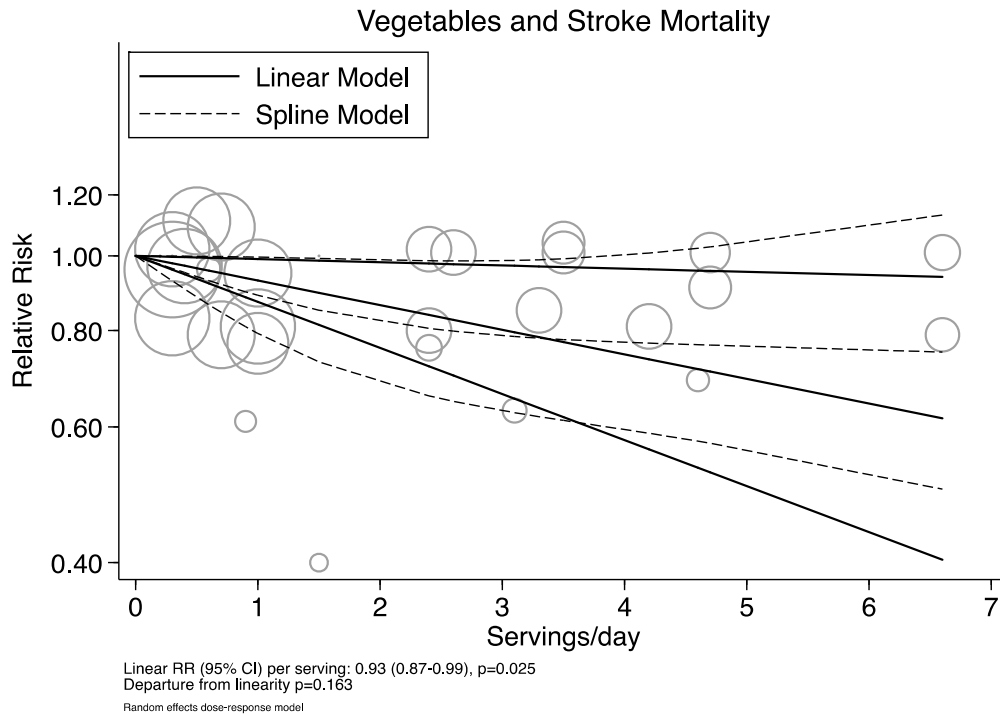

**Figure S160.** Linear and cubic-spline dose-response relation between increasing intake of vegetables and stroke mortality. Linear dose-response data was modeled using the Greenland and Longnecker<sup>23</sup> method to estimate the covariances of multivariable-adjusted relative risk. Cubic spline data were modeled with fixed-effects restricted cubic spline with 3 knots and using the Greenland and Longnecker<sup>23</sup> method to estimate the covariances of multivariable-adjusted relative risk. All data was kept on the original dose scale. The fitted trend for each model is represented by a central line (solid lines for linear model; dashed lines for cubic spline model) with 95% confidence intervals represented by the outer lines. Individual observations are represented by the circles, with the weight of the study in the overall analysis represented by the size of the circles.

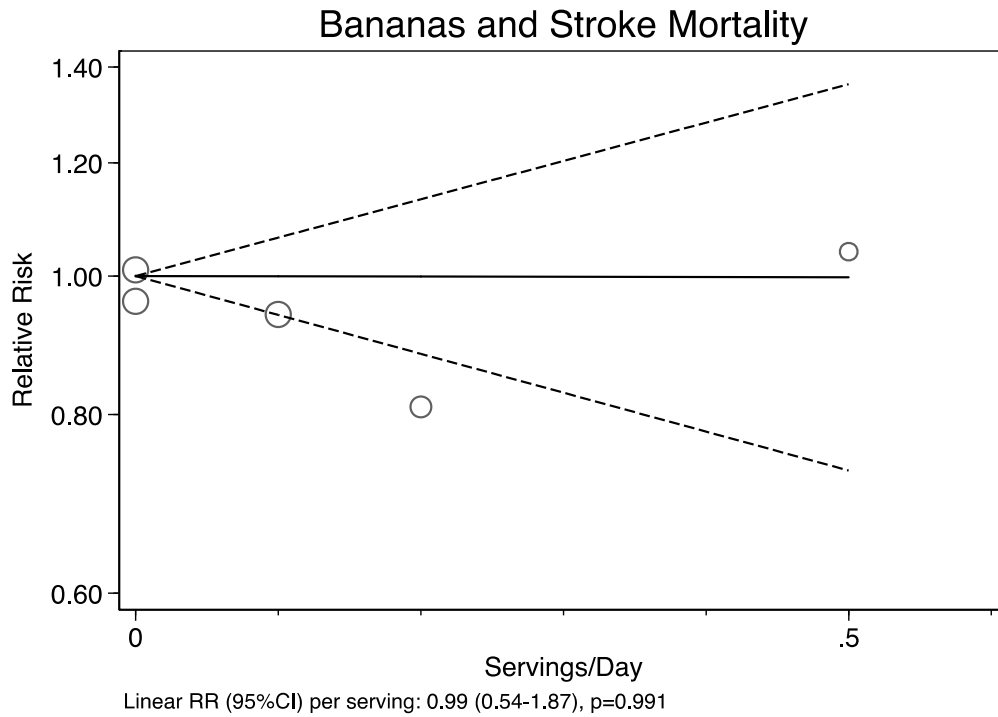

**Figure S161** Linear dose-response relation between increasing banana intake and stroke mortality. Linear dose-response data was modeled using the Greenland and Longnecker<sup>23</sup> method to estimate the covariances of multivariable-adjusted relative risk, with kept on the original dose scale. Dashed lines represent the pointwise 95% confidence intervals for the fitted linear trend represented by a solid line. Individual observations are represented by the circles, with the weight of the study in the overall analysis represented by the size of the circles.



### Berries and Stroke Mortality

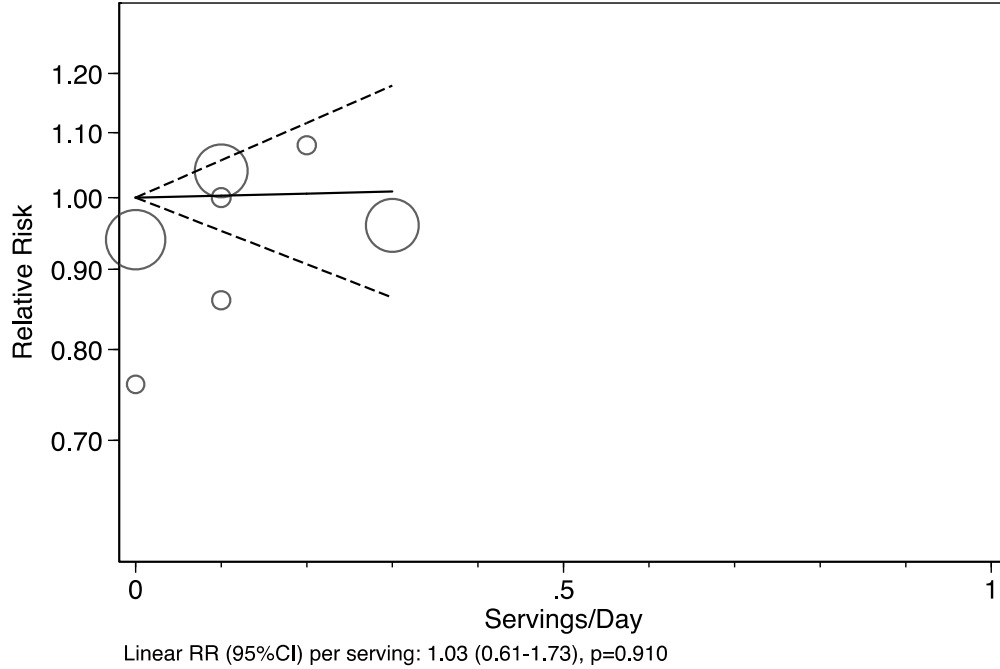

**Figure S162.** Linear dose-response relation between increasing berries intake and stroke mortality. Linear dose-response data was modeled using the Greenland and Longnecker<sup>23</sup> method to estimate the covariances of multivariable-adjusted relative risk, with kept on the original dose scale. Dashed lines represent the pointwise 95% confidence intervals for the fitted linear trend represented by a solid line. Individual observations are represented by the circles, with the weight of the study in the overall analysis represented by the size of the circles.

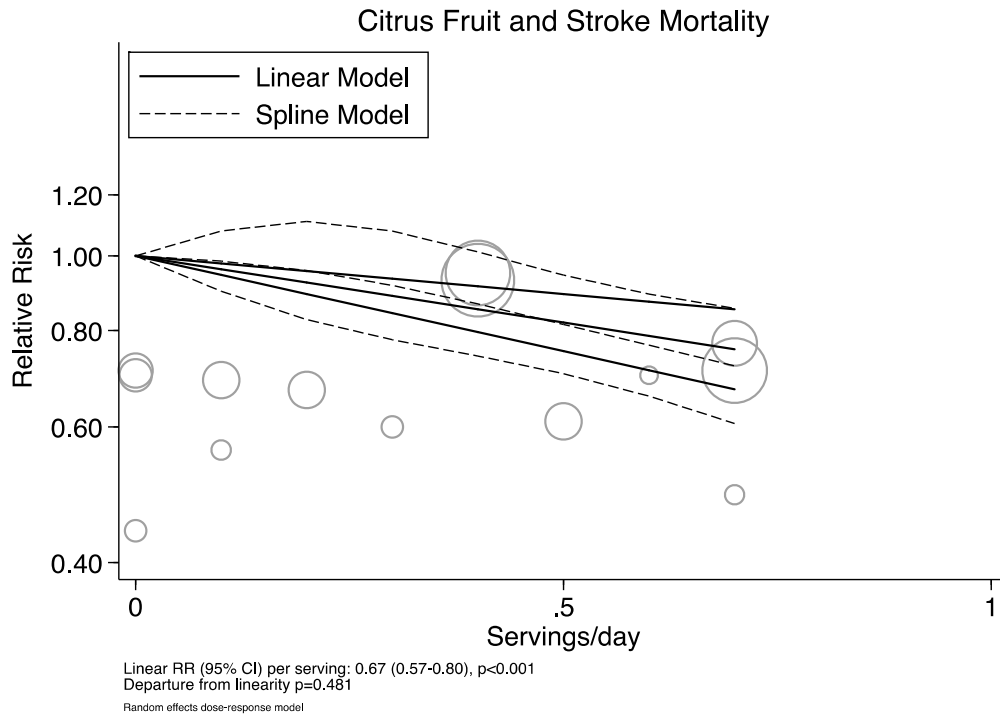

**Figure S163.** Linear and cubic-spline dose-response relation between increasing citrus fruit intake and stroke mortality. Linear dose-response data was modeled using the Greenland and Longnecker<sup>23</sup> method to estimate the covariances of multivariable-adjusted relative risk. Cubic spline data were modeled with fixed-effects restricted cubic spline with 3 knots and using the Greenland and Longnecker<sup>23</sup> method to estimate the covariances of multivariable-adjusted relative risk. All data was kept on the original dose scale. The fitted trend for each model is represented by a central line (solid lines for linear model; dashed lines for cubic spline model) with 95% confidence intervals represented by the outer lines. Individual observations are represented by the circles, with the weight of the study in the overall analysis represented by the size of the circles.

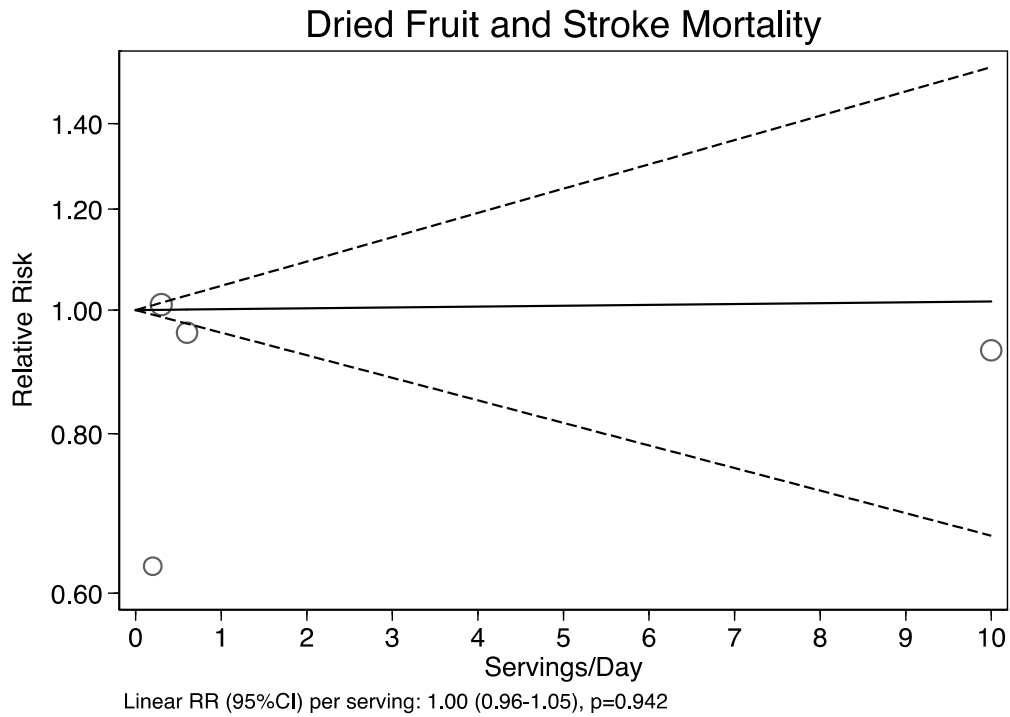

**Figure S164.** Linear and cubic-spline dose-response relation between increasing dried fruit intake and stroke mortality. Linear dose-response data was modeled using the Greenland and Longnecker<sup>23</sup> method to estimate the covariances of multivariable-adjusted relative risk. Cubic spline data were modeled with fixed-effects restricted cubic spline with 3 knots and using the Greenland and Longnecker<sup>23</sup> method to estimate the covariances of multivariable-adjusted relative risk. All data was kept on the original dose scale. The fitted trend for each model is represented by a central line (solid lines for linear model; dashed lines for cubic spline model) with 95% confidence intervals represented by the outer lines. Individual observations are represented by the circles, with the weight of the study in the overall analysis represented by the size of the circles.

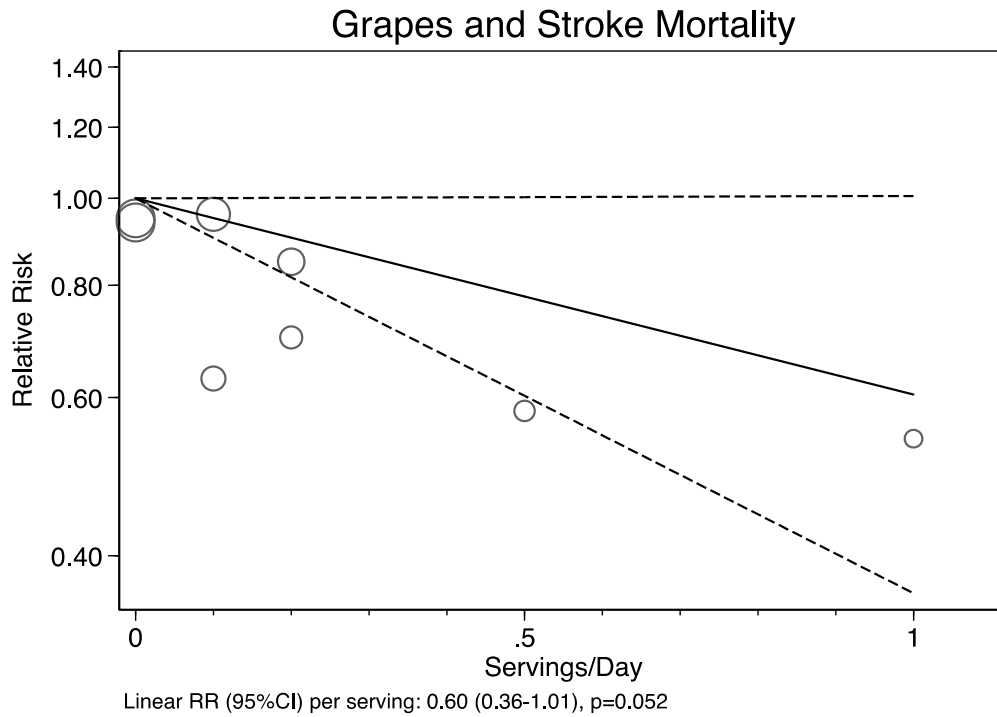

**Figure S165.** Linear dose-response relation between increasing grapes intake and stroke mortality. Linear dose-response data was modeled using the Greenland and Longnecker<sup>23</sup> method to estimate the covariances of multivariable-adjusted relative risk, with kept on the original dose scale. Dashed lines represent the pointwise 95% confidence intervals for the fitted linear trend represented by a solid line. Individual observations are represented by the circles, with the weight of the study in the overall analysis represented by the size of the circles.

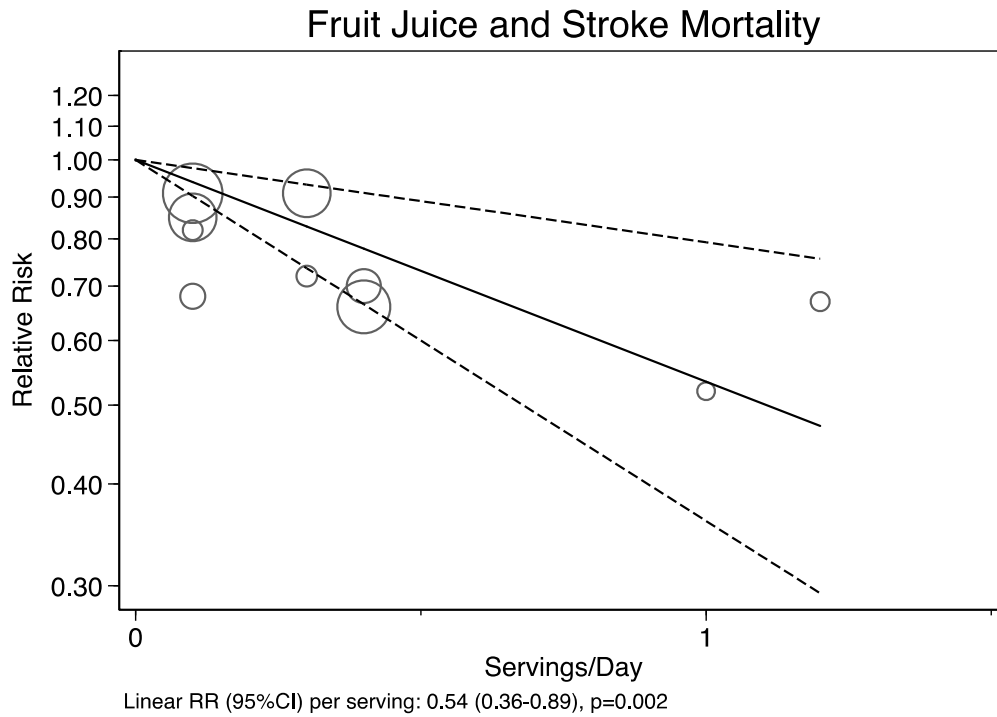

**Figure S166.** Linear dose-response relation between increasing fruit juice intake and stroke mortality. Linear dose-response data was modeled using the Greenland and Longnecker<sup>23</sup> method to estimate the covariances of multivariable-adjusted relative risk, with kept on the original dose scale. Dashed lines represent the pointwise 95% confidence intervals for the fitted linear trend represented by a solid line. Individual observations are represented by the circles, with the weight of the study in the overall analysis represented by the size of the circles.

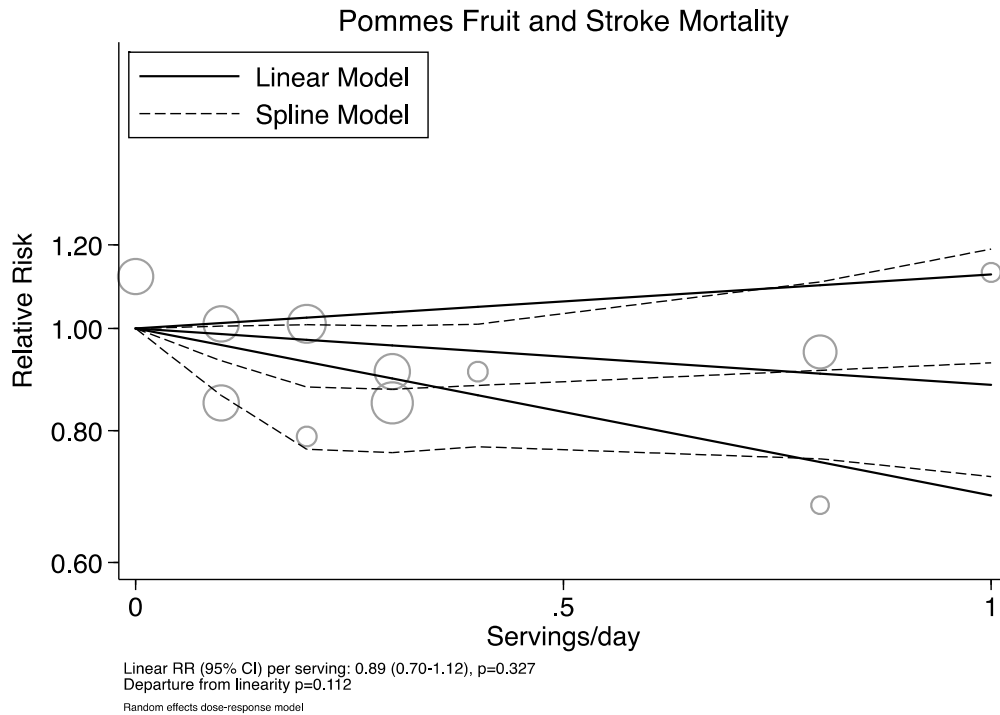

**Figure S167.** Linear and cubic-spline dose-response relation between increasing pomme fruit intake and stroke mortality. Linear dose-response data was modeled using the Greenland and Longnecker<sup>23</sup> method to estimate the covariances of multivariable-adjusted relative risk. Cubic spline data were modeled with fixed-effects restricted cubic spline with 3 knots and using the Greenland and Longnecker<sup>23</sup> method to estimate the covariances of multivariable-adjusted relative risk. All data was kept on the original dose scale. The fitted trend for each model is represented by a central line (solid lines for linear model; dashed lines for cubic spline model) with 95% confidence intervals represented by the outer lines. Individual observations are represented by the circles, with the weight of the study in the overall analysis represented by the size of the circles.

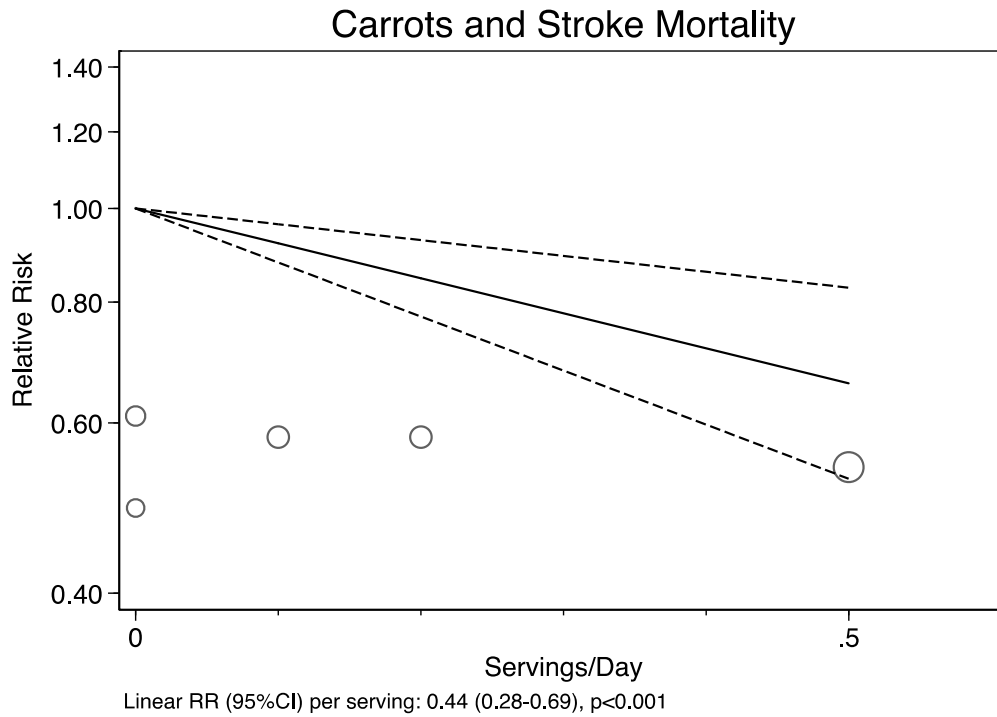

**Figure S168.** Linear dose-response relation between increasing intake of carrots and stroke mortality. Linear dose-response data was modeled using the Greenland and Longnecker<sup>23</sup> method to estimate the covariances of multivariable-adjusted relative risk, with kept on the original dose scale. Dashed lines represent the pointwise 95% confidence intervals for the fitted linear trend represented by a solid line. Individual observations are represented by the circles, with the weight of the study in the overall analysis represented by the size of the circles.

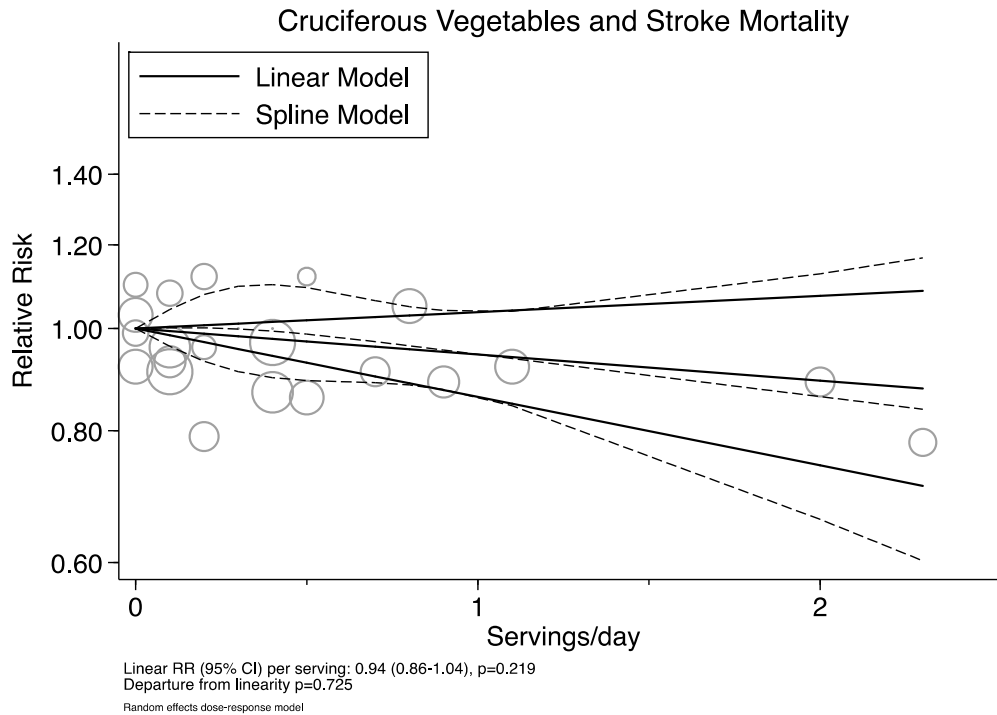

**Figure S169.** Linear and cubic-spline dose-response relation between increasing cruciferous vegetable intake and stroke mortality. Linear dose-response data was modeled using the Greenland and Longnecker<sup>23</sup> method to estimate the covariances of multivariable-adjusted relative risk. Cubic spline data were modeled with fixed-effects restricted cubic spline with 3 knots and using the Greenland and Longnecker<sup>23</sup> method to estimate the covariances of multivariable-adjusted relative risk. All data was kept on the original dose scale. The fitted trend for each model is represented by a central line (solid lines for linear model; dashed lines for cubic spline model) with 95% confidence intervals represented by the outer lines. Individual observations are represented by the circles, with the weight of the study in the overall analysis represented by the size of the circles.



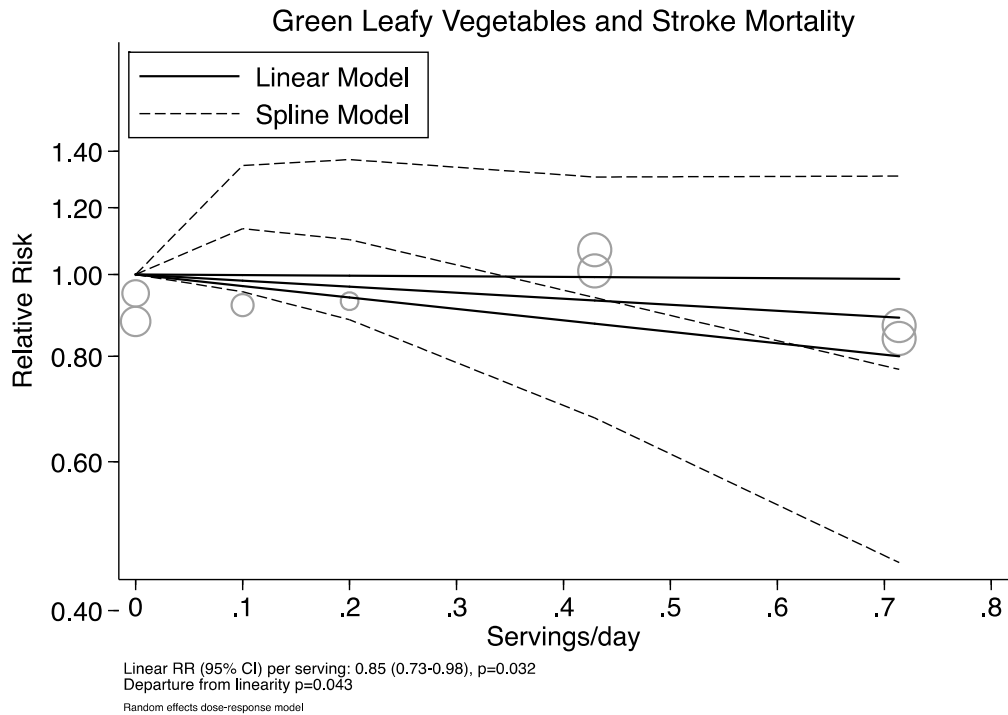

**Figure S170.** Linear and cubic-spline dose-response relation between increasing green leafy vegetable intake and stroke mortality. Linear dose-response data was modeled using the Greenland and Longnecker<sup>23</sup> method to estimate the covariances of multivariable-adjusted relative risk. Cubic spline data were modeled with fixed-effects restricted cubic spline with 3 knots and using the Greenland and Longnecker<sup>23</sup> method to estimate the covariances of multivariable-adjusted relative risk. All data was kept on the original dose scale. The fitted trend for each model is represented by a central line (solid lines for linear model; dashed lines for cubic spline model) with 95% confidence intervals represented by the outer lines. Individual observations are represented by the circles, with the weight of the study in the overall analysis represented by the size of the circles.

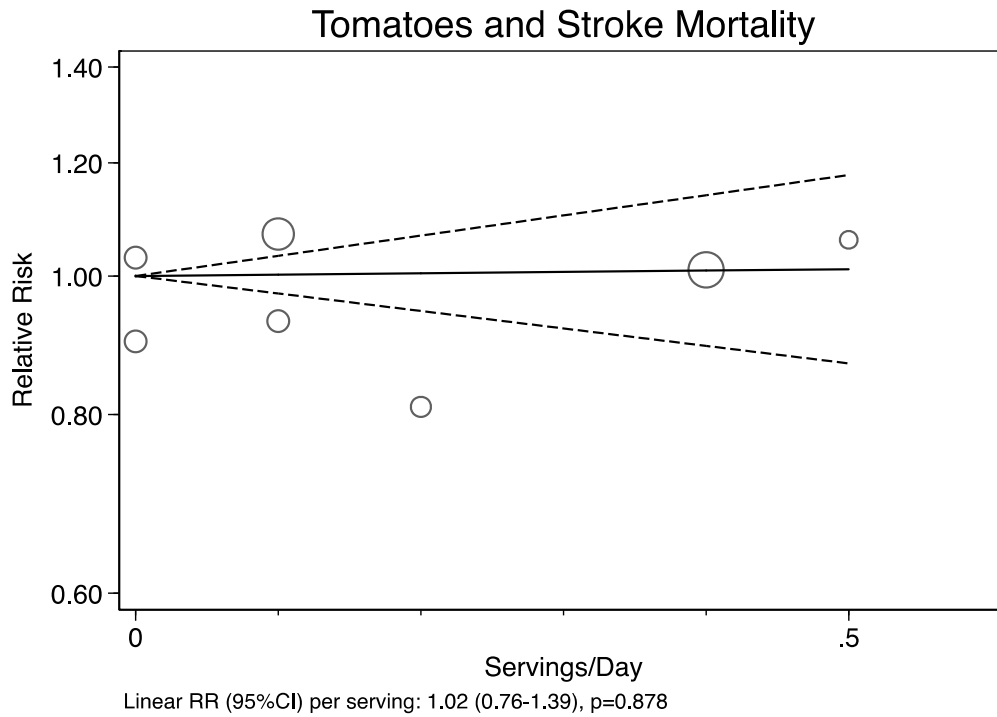

**Figure S171.** Linear dose-response relation between increasing intake of tomatoes and stroke mortality. Linear dose-response data was modeled using the Greenland and Longnecker<sup>23</sup> method to estimate the covariances of multivariable-adjusted relative risk, with kept on the original dose scale. Dashed lines represent the pointwise 95% confidence intervals for the fitted linear trend represented by a solid line. Individual observations are represented by the circles, with the weight of the study in the overall analysis represented by the size of the circles.

## TOTAL FRUIT AND VEGETABLES AND CARDIOVASCULAR DISEASE INCIDENCE

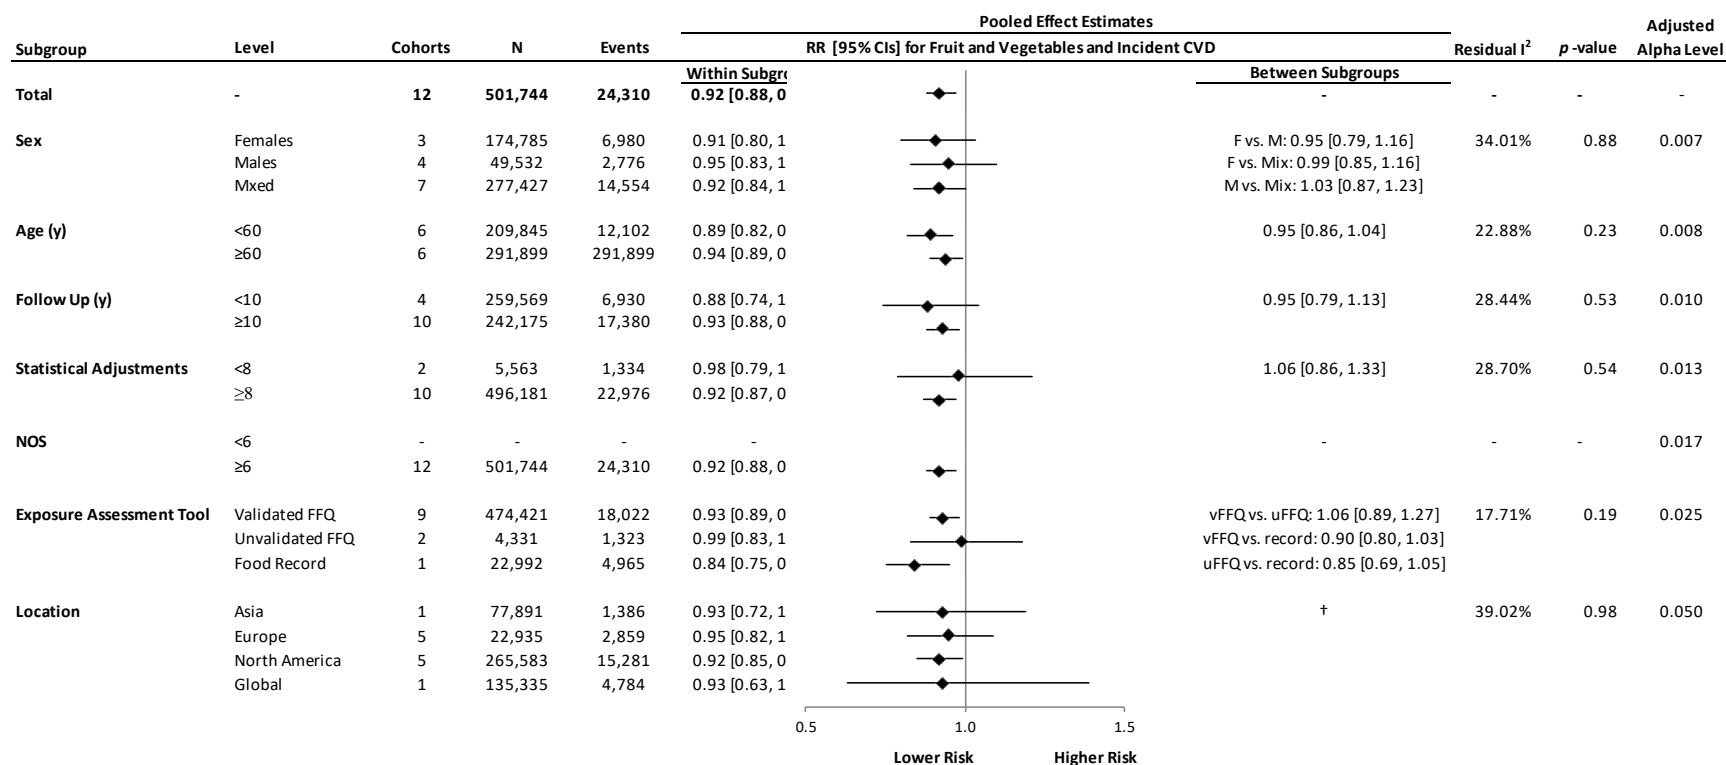

**Figure S172.** Categorical subgroup analyses of total fruit and vegetable intake and cardiovascular disease incidence. Point estimates for within subgroup level are the pooled effect estimates and are represented by a black diamond. The residual I<sup>2</sup> value indicates the inter-study heterogeneity unexplained by the subgroup. CVD – cardiovascular disease; FFQ – food frequency questionnaire; NOS – Newcastle-Ottawa Scale; RR – relative risk; 95% CIs – 95% confidence intervals. † Europe vs. Asia 0.98 [0.74, 1.31]; Europe vs. Global 0.99 [0.64, 1.51]; Europe vs. North America 0.97 [0.83, 1.14]; Asia vs. Global 0.99 [0.62, 1.60]; Asia vs. North America 1.00 [0.78, 1.32]; Global vs. North America 1.02 [0.68, 1.53];

## FRUIT AND CARDIOVASCULAR DISEASE INCIDENCE

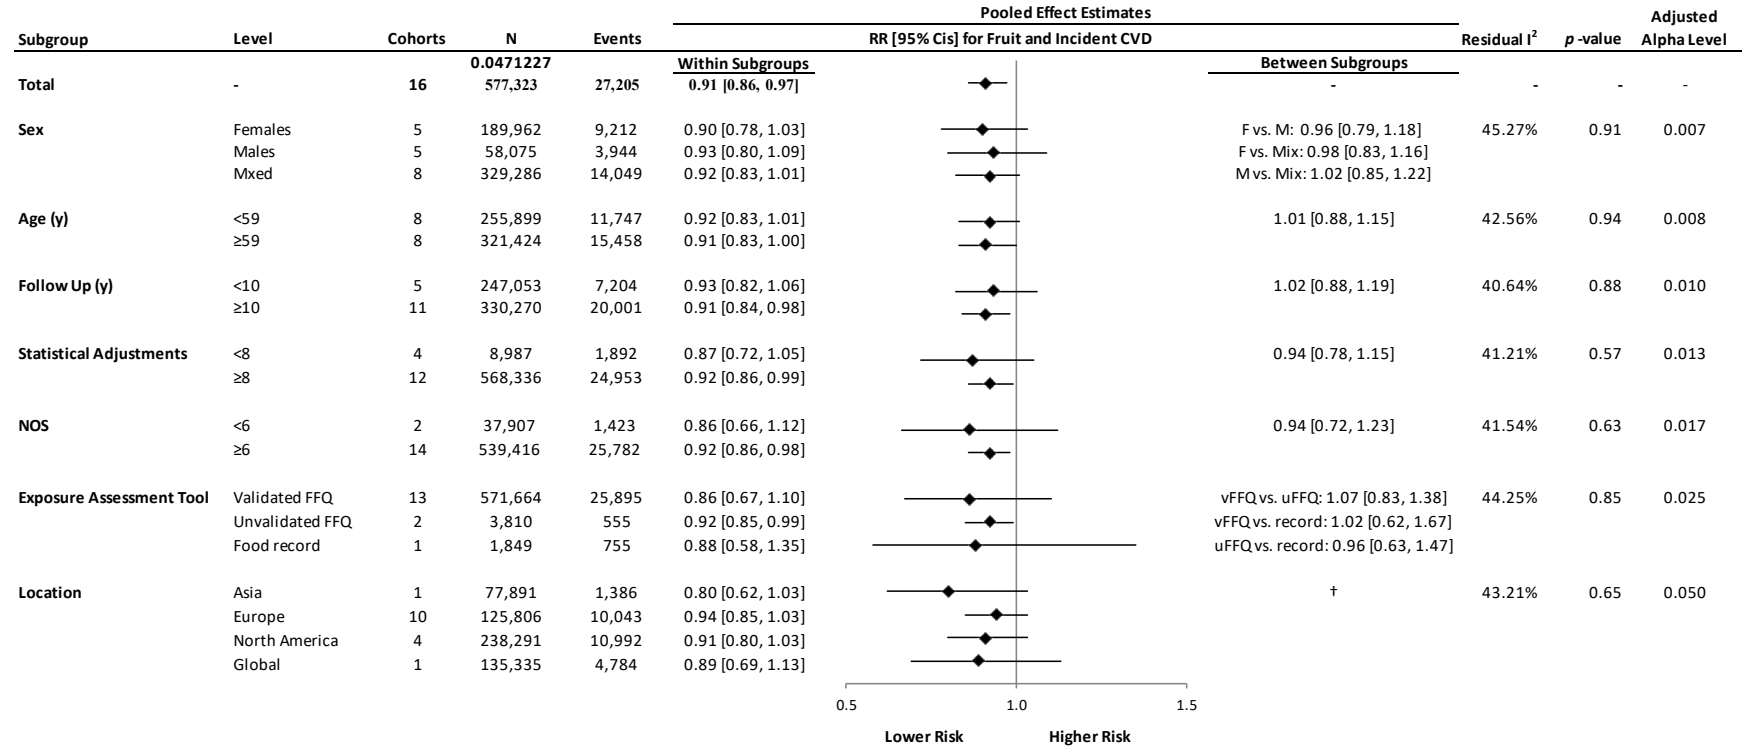

**Figure S173.** Categorical subgroup analyses of fruit intake and cardiovascular disease incidence. Point estimates for within subgroup level are the pooled effect estimates and are represented by a black diamond. The residual I<sup>2</sup> value indicates the inter-study heterogeneity unexplained by the subgroup. CVD – cardiovascular disease; FFQ – food frequency questionnaire; NOS – Newcastle-Ottawa Scale; RR – relative risk; 95% CIs – 95% confidence intervals.  
 † Europe vs. Asia 0.85 [0.65, 1.12]; Europe vs. Global 0.94 [0.73, 1.23]; Europe vs. North America 0.96 [0.82, 1.13]; Asia vs. Global 0.90 [0.63, 1.29]; Asia vs. North America 0.88 [0.67, 1.18]; Global vs. North America 0.98 [0.74, 1.29]

## VEGETABLES AND CARDIOVASCULAR DISEASE INCIDENCE

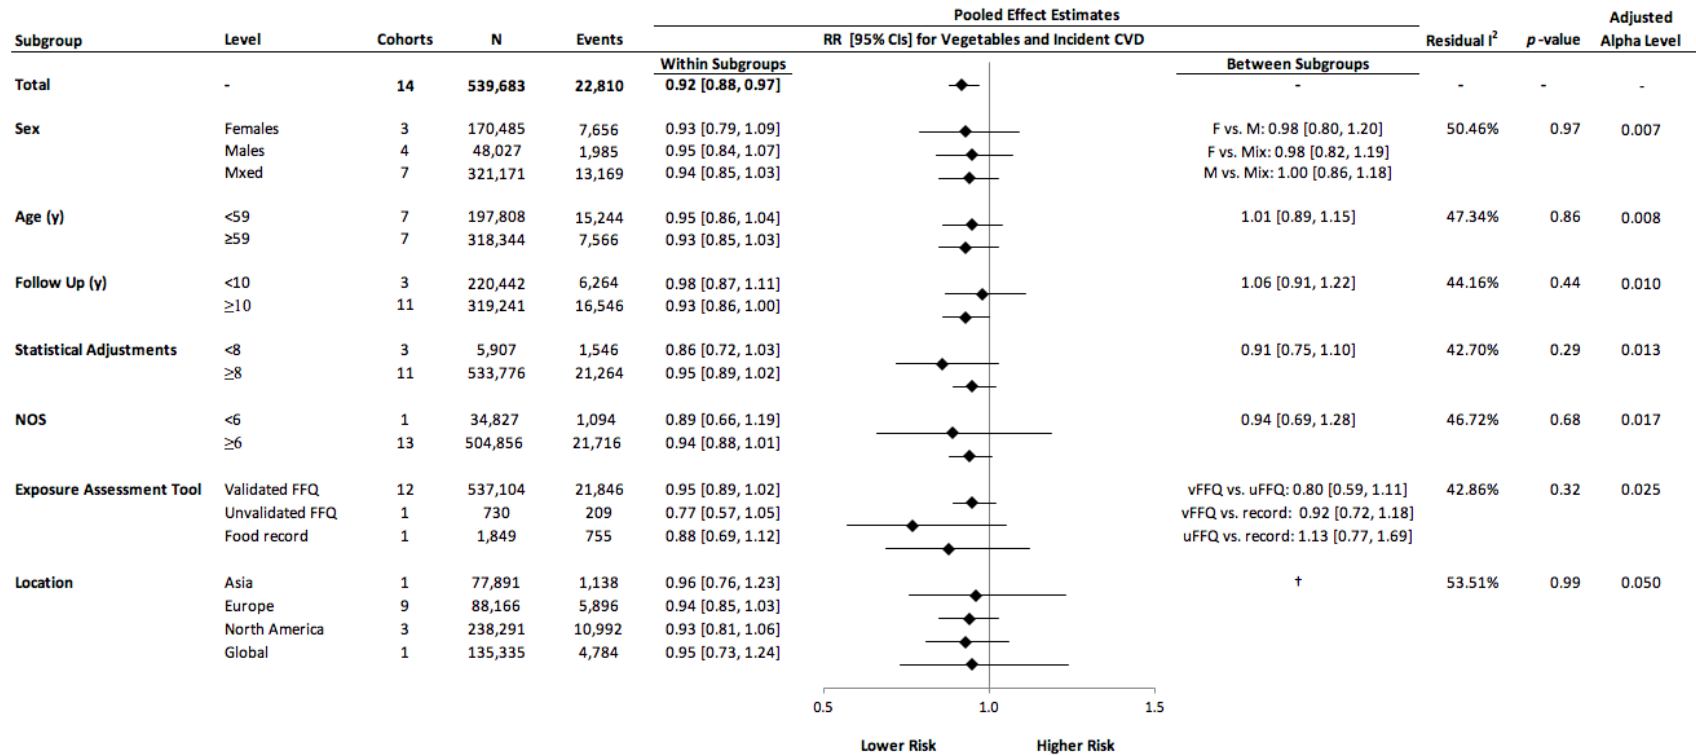

**Figure S174.** Categorical subgroup analyses of intake of vegetables and cardiovascular disease incidence. Point estimates for within subgroup level are the pooled effect estimates and are represented by a black diamond. The residual I<sup>2</sup> value indicates the inter-study heterogeneity unexplained by the subgroup. CVD – cardiovascular disease; FFQ – food frequency questionnaire; NOS – Newcastle-Ottawa Scale; RR – relative risk; 95% CIs – 95% confidence intervals.  
 † Europe vs. Asia 1.03 [0.79, 1.33]; Europe vs. Global 1.01 [0.76, 1.34]; Europe vs. NA 0.99 [0.84, 1.16]; Asia vs. Global 1.01 [0.71, 1.45]; Asia vs. NA 1.04 [0.79, 1.37]; Global vs. NA 1.03 [0.76, 1.38]

## TOTAL FRUIT AND VEGETABLES AND CARDIOVASCULAR DISEASE MORTALITY

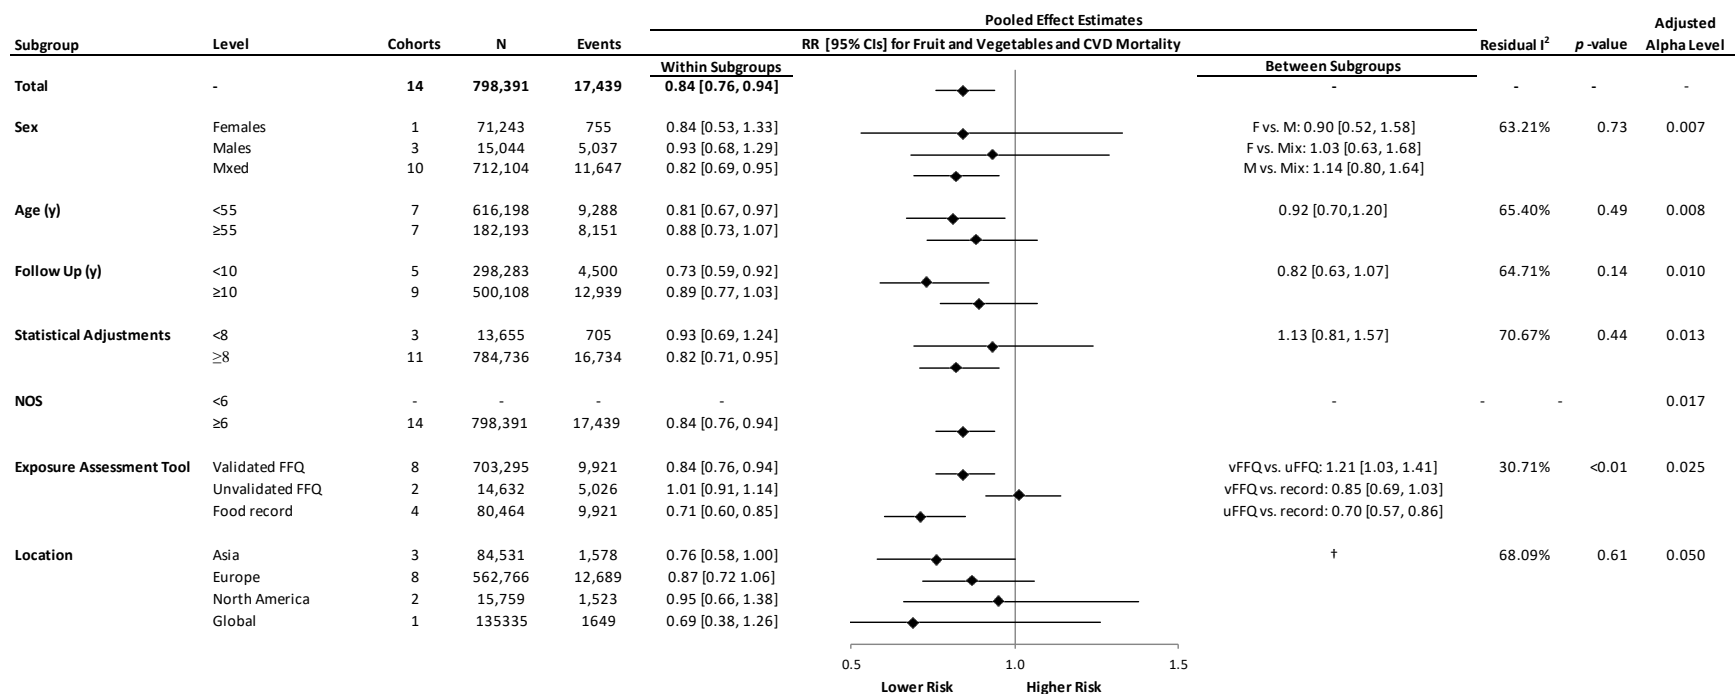

**Figure S175.** Categorical subgroup analyses of total fruit and vegetable intake and cardiovascular disease mortality. Point estimates for within subgroup level are the pooled effect estimates and are represented by a black diamond. The residual I<sup>2</sup> value indicates the inter-study heterogeneity unexplained by the subgroup. CVD – cardiovascular disease; FFQ – food frequency questionnaire; NOS – Newcastle-Ottawa Scale; RR – relative risk; 95% CIs – 95% confidence intervals. † Europe vs. Asia 0.87 [0.63, 1.22]; Europe vs. Global 0.79 [0.42, 1.49]; Europe vs. North America 1.09 [0.72, 1.66]; Asia vs. Global 1.10 [0.57, 2.13]; Asia vs. North America 0.80 [0.50, 1.27]; Global vs. North America 0.73 [0.36, 1.47]

## FRUIT AND CARDIOVASCULAR DISEASE MORTALITY

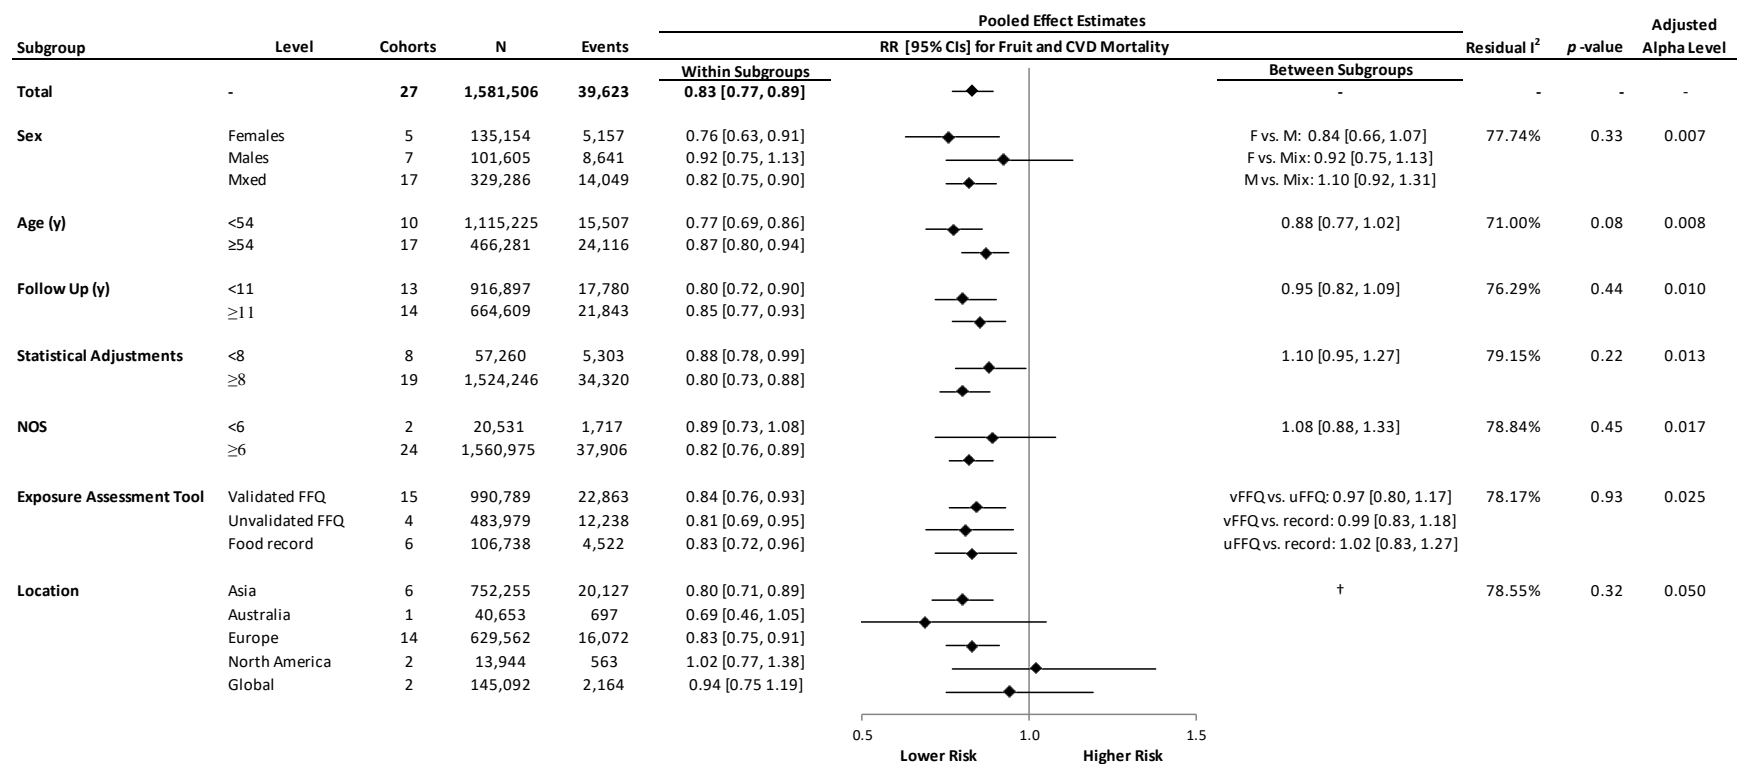

**Figure S176.** Categorical subgroup analyses of fruit intake and cardiovascular disease mortality. Point estimates for within subgroup level are the pooled effect estimates and are represented by a black diamond. The residual I<sup>2</sup> value indicates the inter-study heterogeneity unexplained by the subgroup. CVD – cardiovascular disease; FFQ – food frequency questionnaire; NOS – Newcastle-Ottawa Scale; RR – relative risk; 95% CIs – 95% confidence intervals.  
 † Europe vs. Asia 0.96 [0.83, 1.13]; Europe vs. Australia 0.84 [0.55, 1.28]; Europe vs. Global 1.14 [0.89, 1.47]; Europe vs. North America 1.25 [0.92, 1.70]; Asia vs. Australia 1.15 [0.75, 1.77]; Asia vs. Global 0.85 [0.65, 1.10]; Asia vs. North America 0.77 [0.56, 1.06]; Australia vs. Global 0.73 [0.46, 1.18]; Australia vs. North America 0.67 [0.41, 1.12]; Global vs. North America 0.92 [0.63, 1.33]

## VEGETABLES AND CARDIOVASCULAR DISEASE MORTALITY

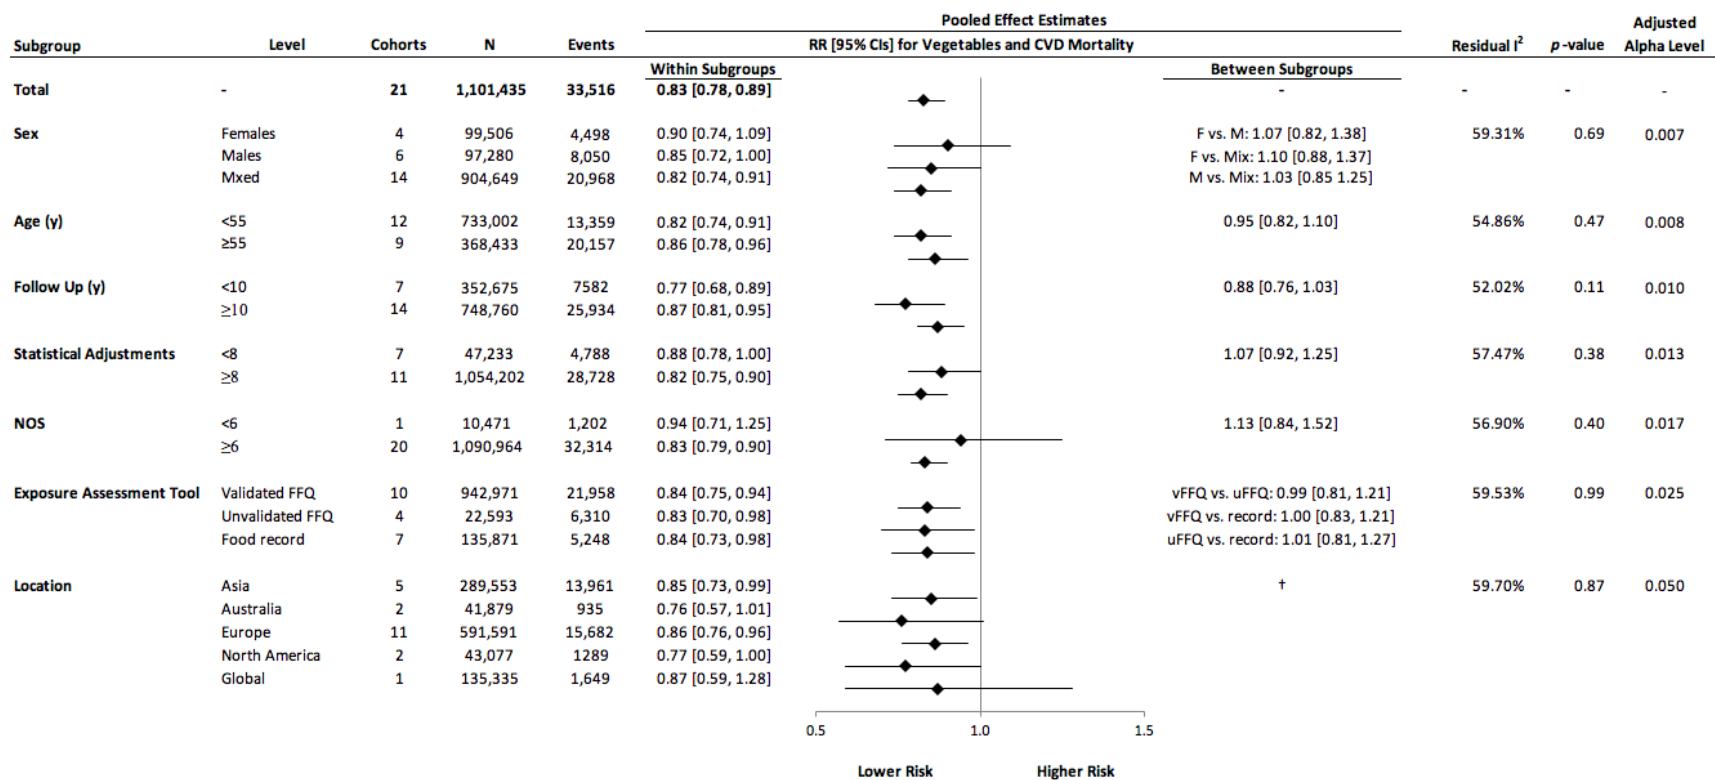

**Figure S177.** Categorical subgroup analyses of intake of vegetables and cardiovascular disease mortality. Point estimates for within subgroup level are the pooled effect estimates and are represented by a black diamond. The residual I<sup>2</sup> value indicates the inter-study heterogeneity unexplained by the subgroup. CVD – cardiovascular disease; FFQ – food frequency questionnaire; NOS – Newcastle-Ottawa Scale; RR – relative risk; 95% CIs – 95% confidence intervals.  
 † Europe vs. Asia 0.99 [0.82, 1.19]; Europe vs. Australia 0.88 [0.65, 1.20]; Europe vs. Global 1.01 [0.68, 1.52]; Europe vs. North America 0.90 [0.67, 1.20]; Asia vs. Australia 1.12 [0.81, 1.56]; Asia vs. Global 0.98 [0.64, 1.48]; Asia vs. North America 1.11 [0.81, 1.50]; Australia vs. Global 0.87 [0.54, 1.41]; Australia vs. North America 0.98 [0.66, 1.46]; Global vs. North America 1.13 [0.71, 1.81]



## TOTAL FRUIT AND VEGETABLES AND CORONARY HEART DISEASE INCIDENCE

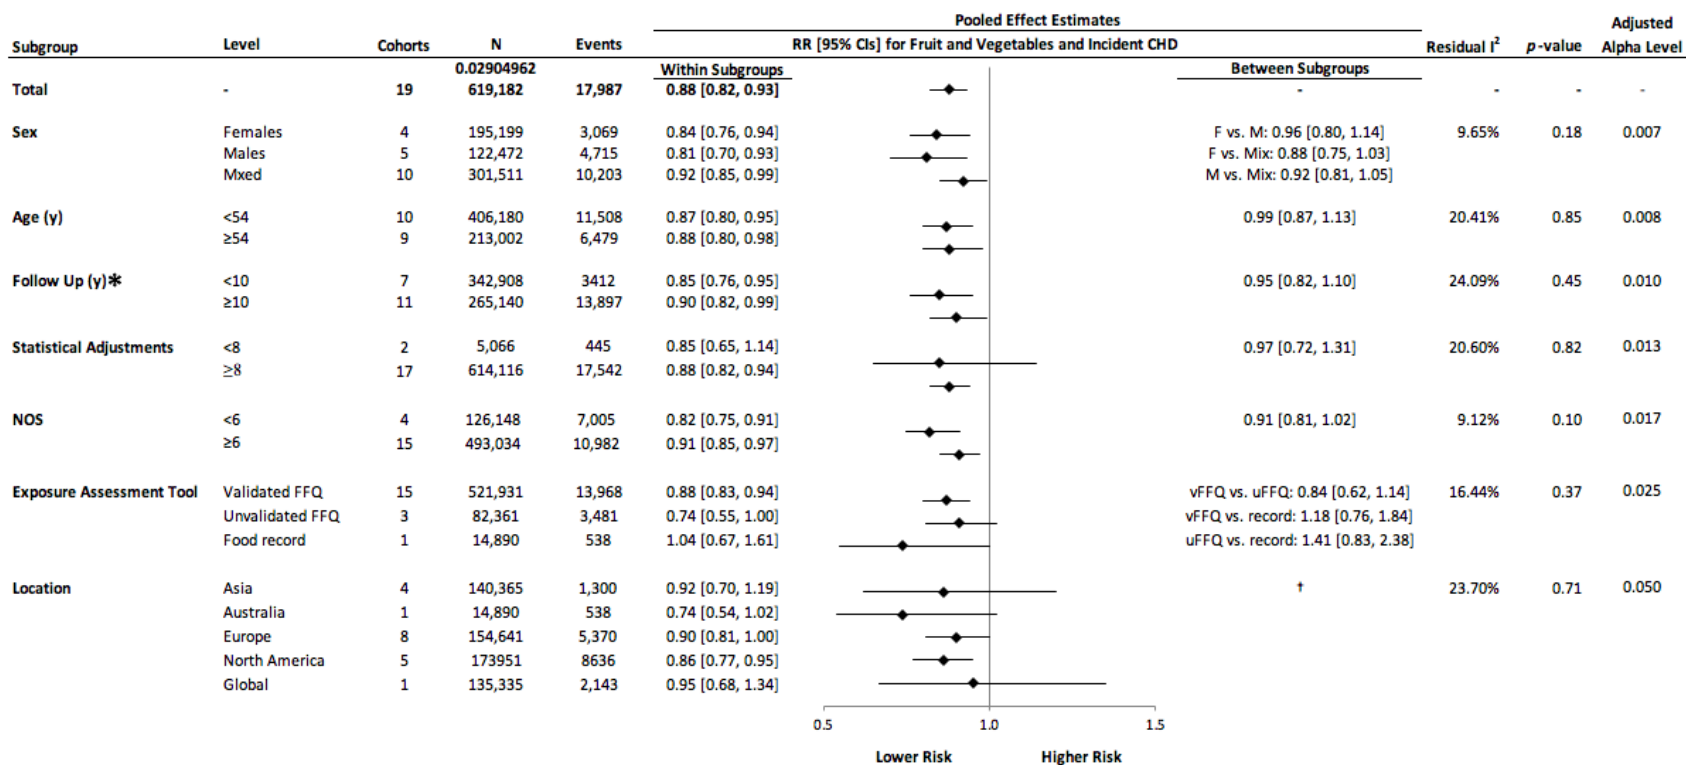

**Figure S178.** Categorical subgroup analyses of total fruit and vegetable intake and incident coronary heart disease. Point estimates for within subgroup level are the pooled effect estimates and are represented by a black diamond. The residual I<sup>2</sup> value indicates the inter-study heterogeneity unexplained by the subgroup. CHD – coronary heart disease; FFQ – food frequency questionnaire; NOS – Newcastle-Ottawa Scale; RR – relative risk; 95% CIs – 95% confidence intervals. \* Follow-up years includes 17 cohorts as Bingham et al. 2008 (EPIC Norfolk) did not report follow-up time. † Europe vs. Asia 1.02 [0.77, 1.35]; Europe vs. Australia 0.82 [0.59, 1.14]; Europe vs. Global 1.06 [0.74, 1.51]; Europe vs. North America 0.95 [0.83, 1.10]; Asia vs. Australia 1.24 [0.82, 1.87]; Asia vs. Global 0.96 [0.63, 1.48]; Asia vs. North America 1.07 [0.81, 1.42]; Australia vs. Global 0.78 [0.49, 1.24]; Australia vs. North America 0.86 [0.62, 1.21]; Global vs. North America 1.11 [0.78, 1.58]

## FRUIT AND CORONARY HEART DISEASE INCIDENCE

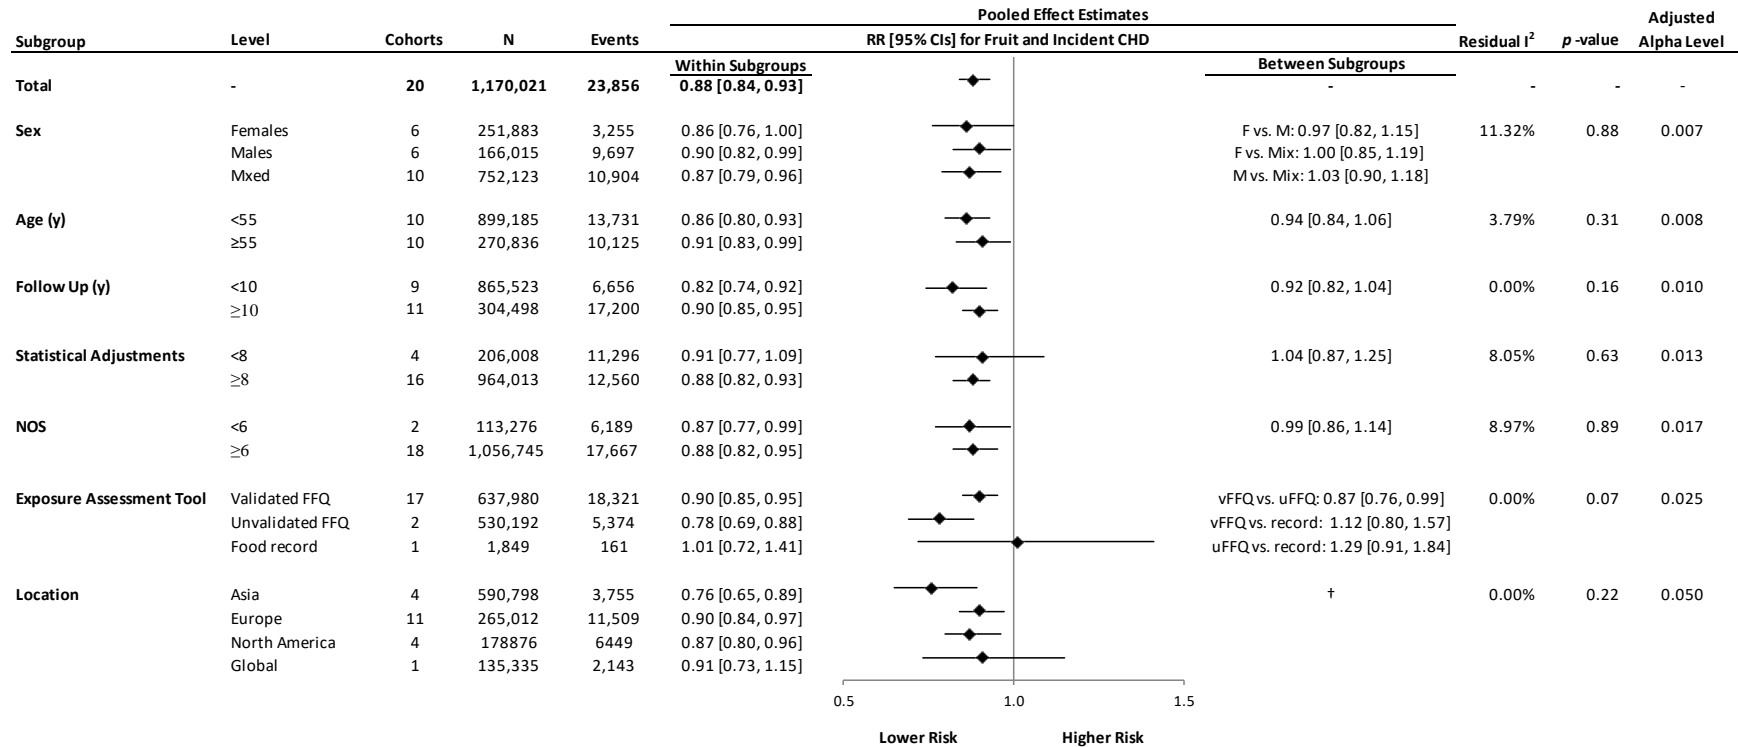

**Figure S179.** Categorical subgroup analyses of fruit intake and incident coronary heart disease. Point estimates for within subgroup level are the pooled effect estimates and are represented by a black diamond. The residual I<sup>2</sup> value indicates the inter-study heterogeneity unexplained by the subgroup. CHD – coronary heart disease; FFQ – food frequency questionnaire; NOS – Newcastle-Ottawa Scale; RR – relative risk; 95% CIs – 95% confidence intervals. † Europe vs. Asia 0.84 [0.71, 0.99]; Europe vs. Global 1.01 [0.79, 1.29]; Europe vs. North America 0.96 [0.85, 1.08]; Asia vs. Global 0.83 [0.63, 1.10]; Asia vs. North America 0.87 [0.73, 1.04]; Global vs. North America 1.05 [0.82, 1.34]

## VEGETABLE AND CORONARY HEART DISEASE INCIDENCE

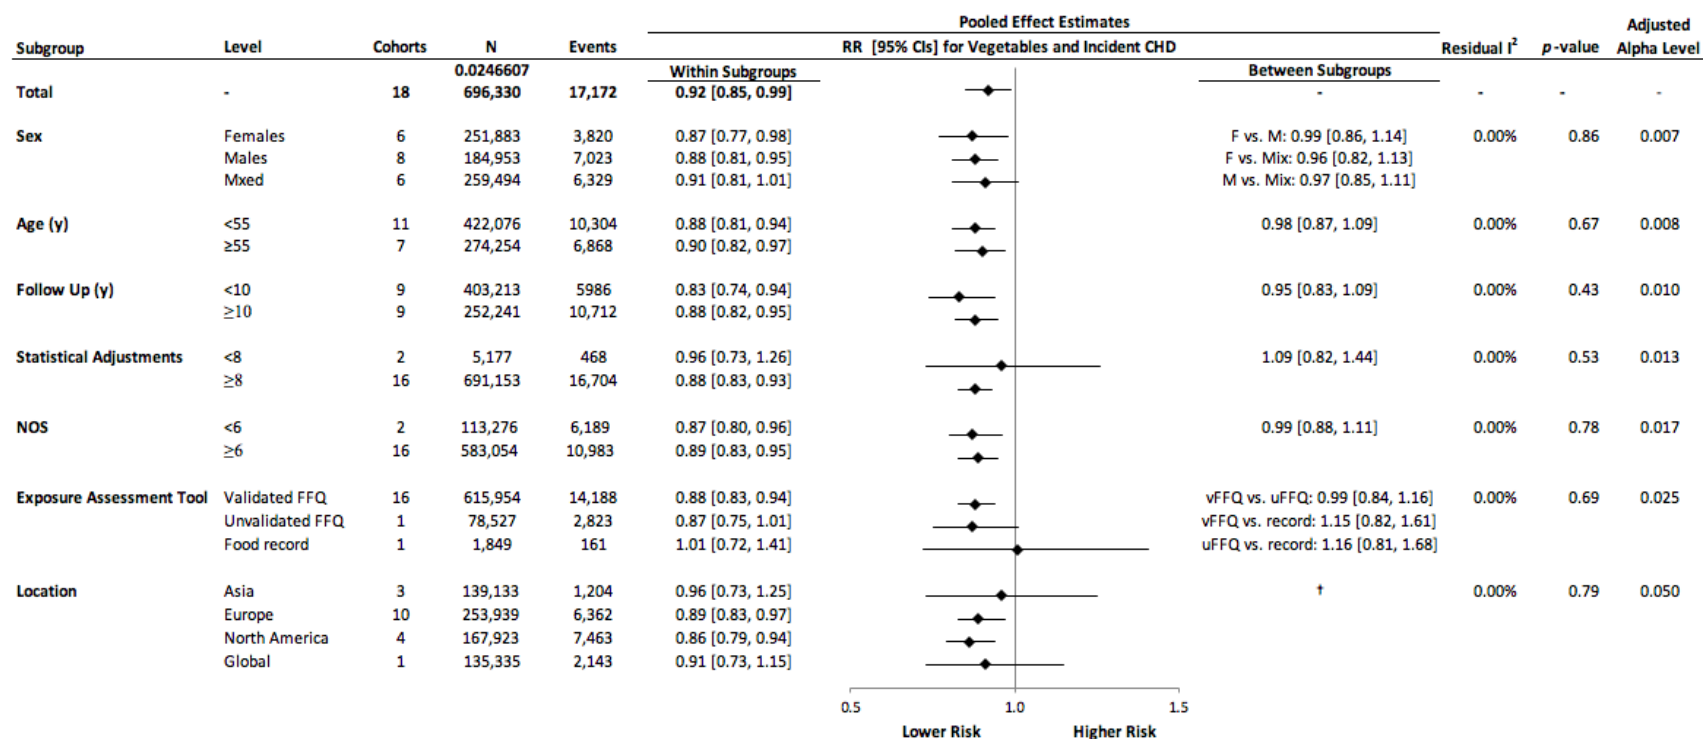

**Figure S180.** Categorical subgroup analyses of intake of vegetables and incident coronary heart disease. Point estimates for within subgroup level are the pooled effect estimates and are represented by a black diamond. The residual I<sup>2</sup> value indicates the inter-study heterogeneity unexplained by the subgroup. CHD – coronary heart disease; FFQ – food frequency questionnaire; NOS – Newcastle-Ottawa Scale; RR – relative risk; 95% CIs – 95% confidence intervals.

† Europe vs. Asia 1.07 [0.81, 1.41]; Europe vs. Global 1.02 [0.80, 1.30]; Europe vs. NA 0.96 [0.85, 1.08]; Asia vs. Global 1.05 [0.74, 1.49]; Asia vs. NA 1.11 [0.84, 1.48]; Global vs. NA 1.07 [0.83, 1.37]

## CITRUS FRUIT AND CORONARY HEART DISEASE INCIDENCE

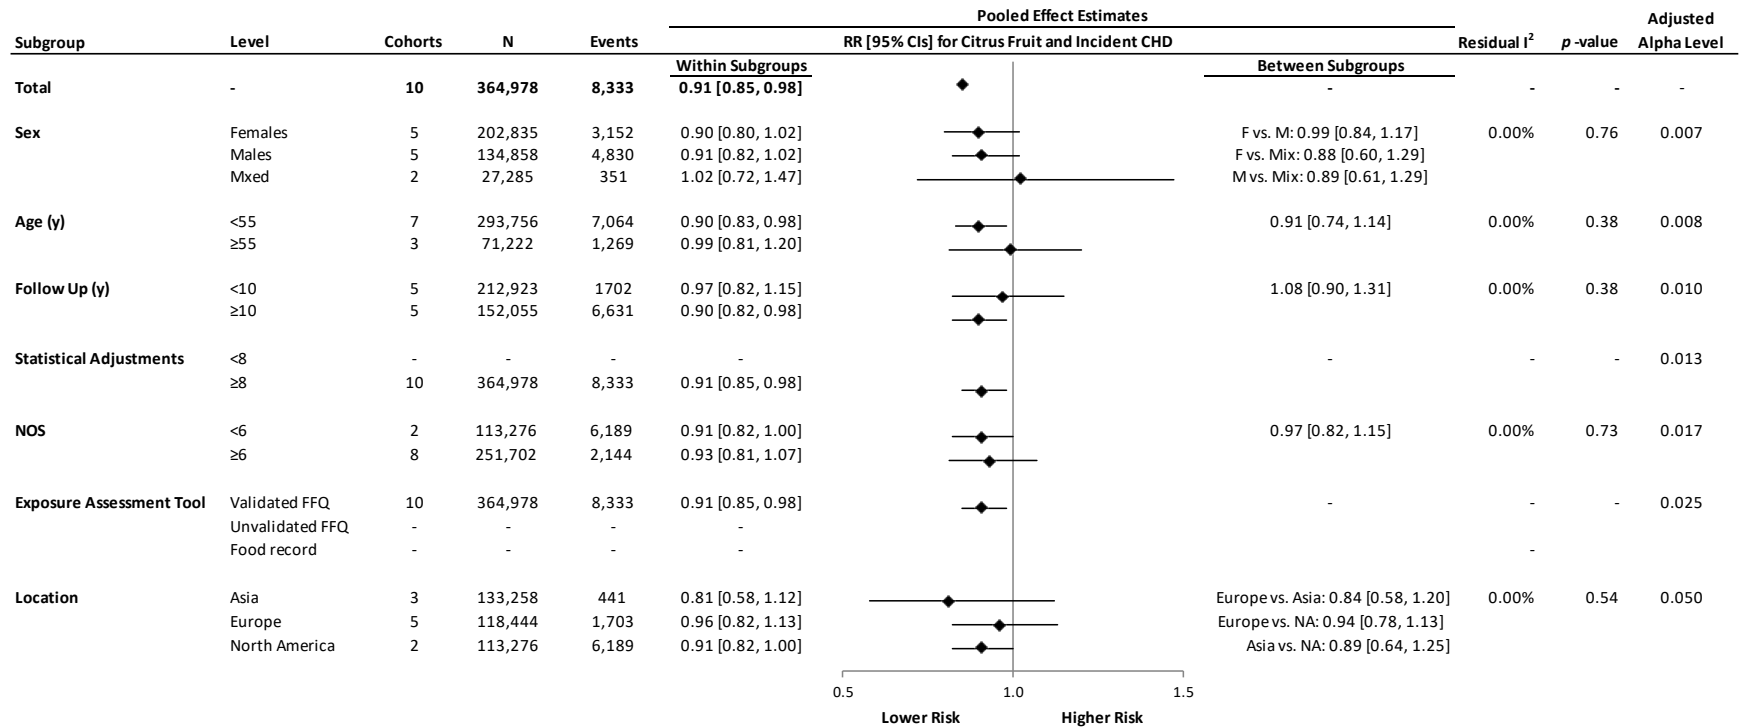

**Figure S181.** Categorical subgroup analyses of citrus fruit intake and incident coronary heart disease. Point estimates for within subgroup level are the pooled effect estimates and are represented by a black diamond. The residual I<sup>2</sup> value indicates the inter-study heterogeneity unexplained by the subgroup. CHD – coronary heart disease; FFQ – food frequency questionnaire; NOS – Newcastle-Ottawa Scale; RR – relative risk; 95% CIs – 95% confidence intervals.

## FRUIT AND CORONARY HEART DISEASE MORTALITY

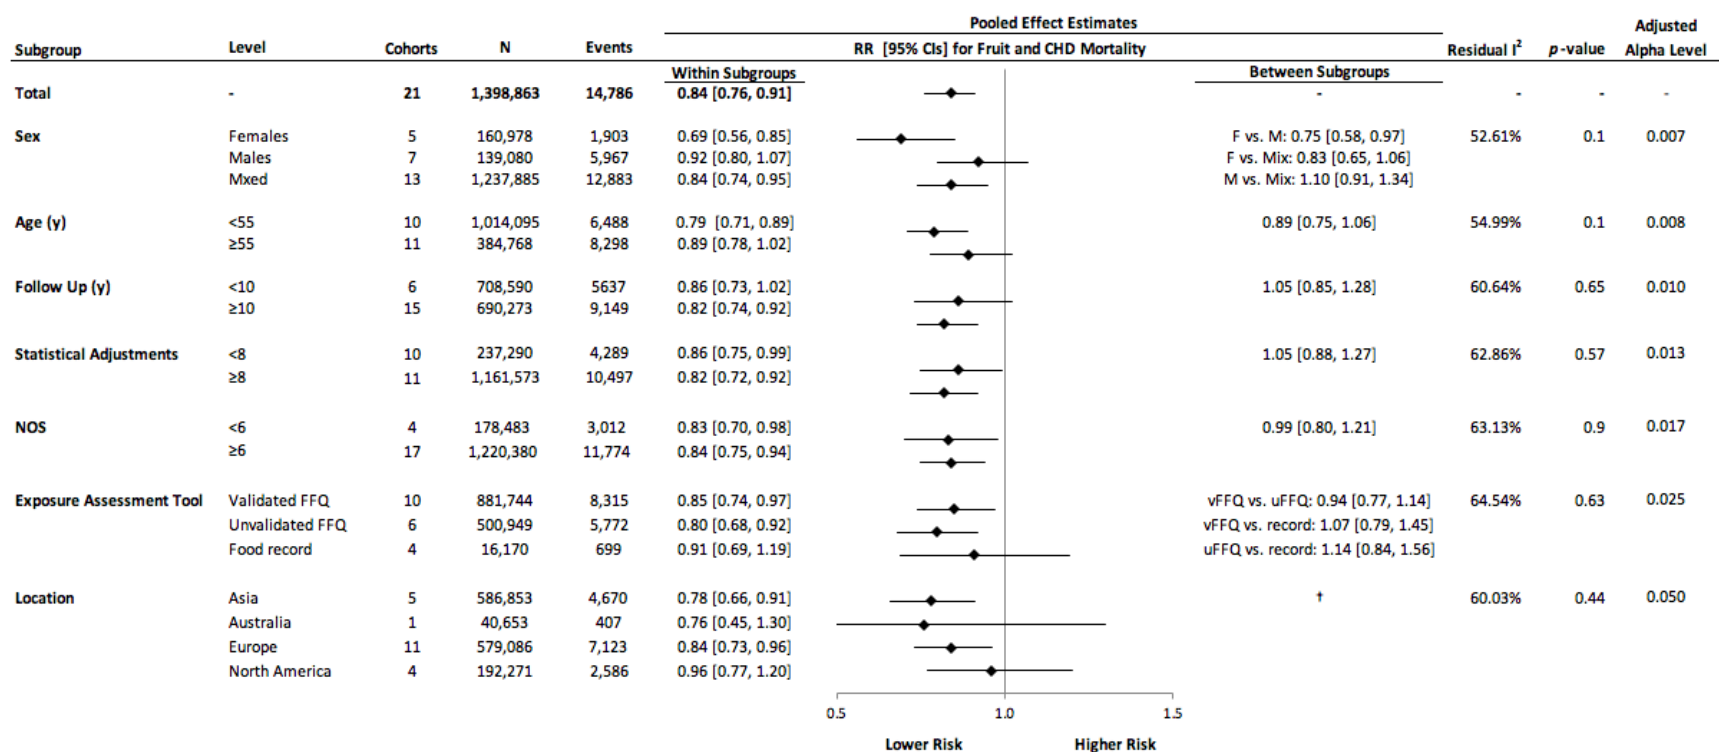

**Figure S182.** Categorical subgroup analyses of fruit intake and coronary heart disease mortality. Point estimates for within subgroup level are the pooled effect estimates and are represented by a black diamond. The residual I<sup>2</sup> value indicates the inter-study heterogeneity unexplained by the subgroup. CHD – coronary heart disease; FFQ – food frequency questionnaire; NOS – Newcastle-Ottawa Scale; RR – relative risk; 95% CIs – 95% confidence intervals.

† Europe vs. Asia 0.93 [0.76, 1.14]; Europe vs. Australia 0.91 [0.53, 1.57]; Europe vs. North America 1.15 [0.89, 1.47]; Asia vs. Australia 1.01 [0.59, 1.77]; Asia vs. North America 0.81 [0.62, 1.06]; Australia vs. North America 0.80 [0.45, 1.41]

## VEGETABLES AND CORONARY HEART DISEASE MORTALITY

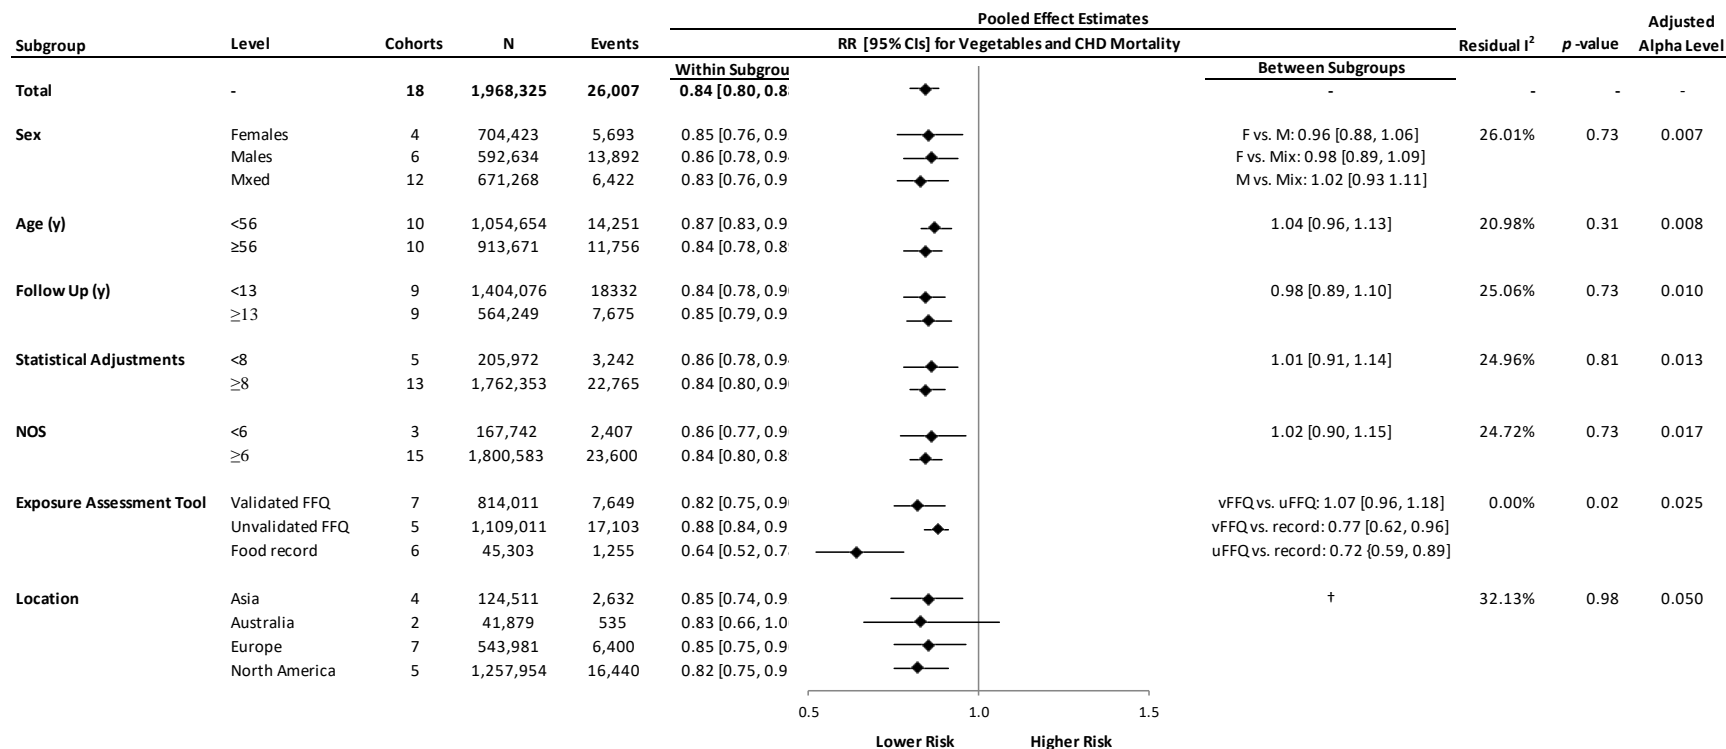

**Figure S183.** Categorical subgroup analyses of intake of vegetables and coronary heart disease mortality. Point estimates for within subgroup level are the pooled effect estimates and are represented by a black diamond. The residual I<sup>2</sup> value indicates the inter-study heterogeneity unexplained by the subgroup. CHD – coronary heart disease; FFQ – food frequency questionnaire; NOS – Newcastle-Ottawa Scale; RR – relative risk; 95% CIs – 95% confidence intervals.

† Europe vs. Asia 0.98 [0.83, 1.17]; Europe vs. Australia 0.98 [0.75, 1.28]; Europe vs. North America 0.97 [0.83, 1.14]; Asia vs. Australia 1.01 [0.77, 1.32]; Asia vs. North America 1.02 [0.87, 1.19]; Australia vs. North America 1.01 [0.78, 1.30]

## TOTAL FRUIT AND VEGETABLES AND STROKE INCIDENCE

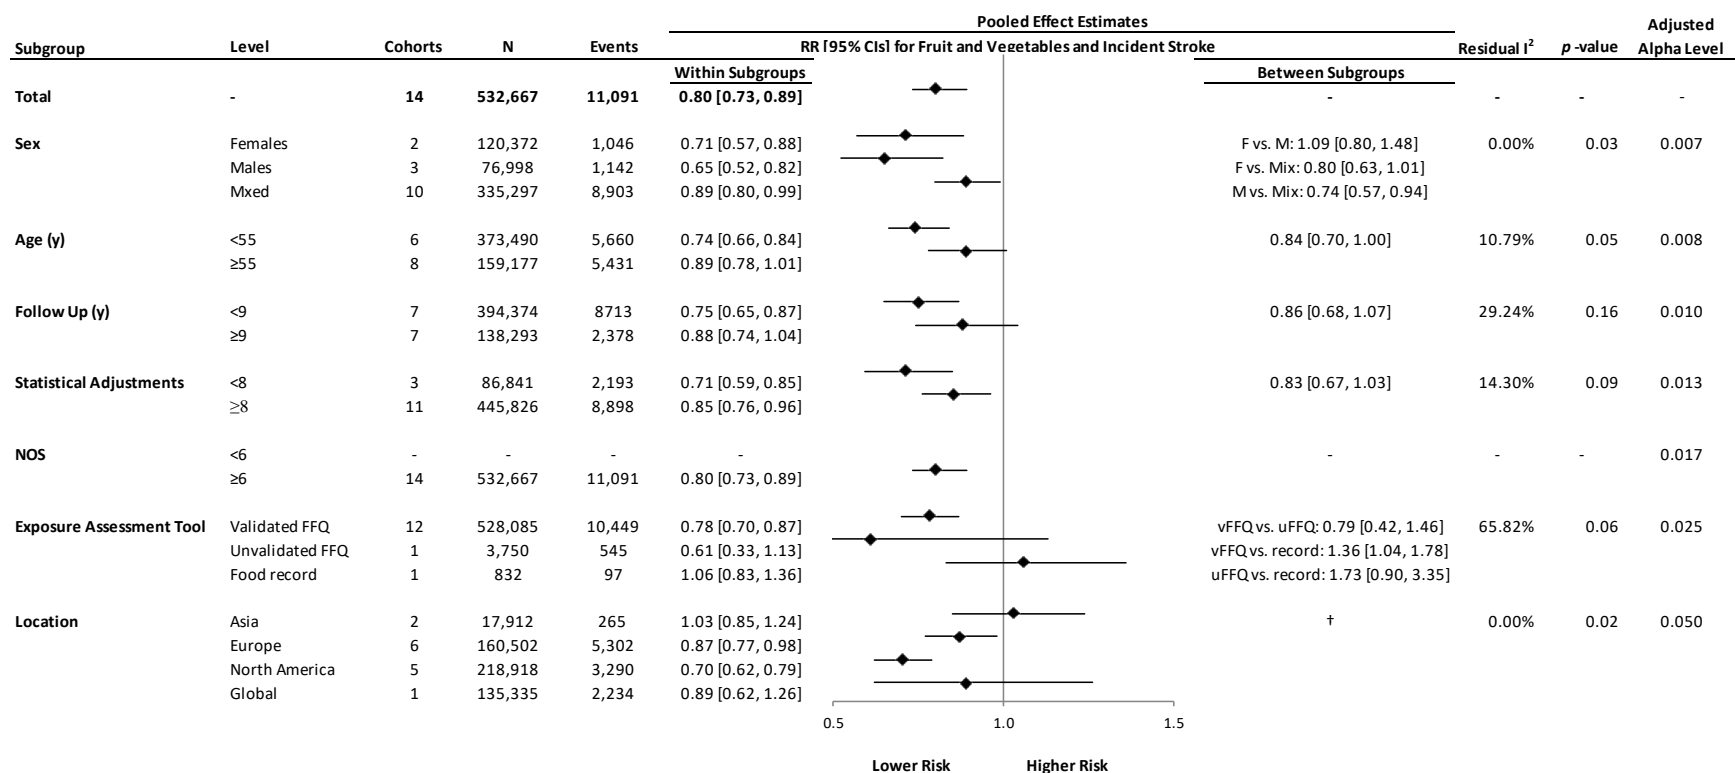

**Figure S184.** Categorical subgroup analyses of total fruit and vegetable intake and stroke incidence. Point estimates for within subgroup level are the pooled effect estimates and are represented by a black diamond. The residual I<sup>2</sup> value indicates the inter-study heterogeneity unexplained by the subgroup. CHD – coronary heart disease; FFQ – food frequency questionnaire; NOS – Newcastle-Ottawa Scale; RR – relative risk; 95% CIs – 95% confidence intervals.

† Europe vs Asia 1.17 [0.94, 1.47]; Europe vs Global 1.02 [0.70, 1.48]; Europe vs NA 0.81 [0.68, 0.96]; Asia vs Global 1.16 [0.77, 1.72]; Asia vs NA 1.46 [1.16, 1.84]; Global vs NA 1.27 [0.87, 1.84]

## FRUIT AND STROKE INCIDENCE

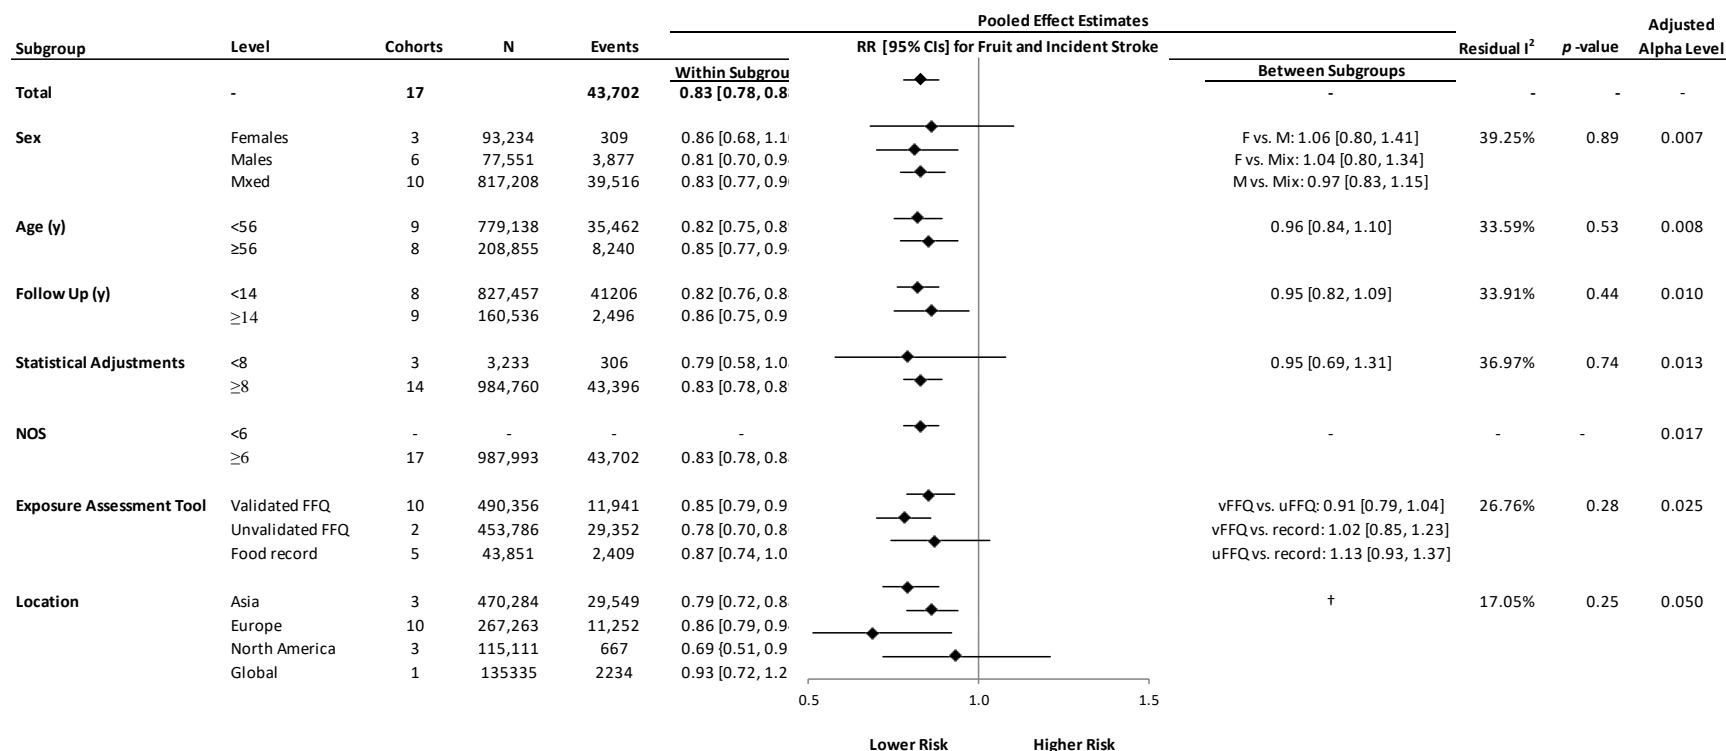

**Figure S185.** Categorical subgroup analyses of fruit intake and stroke incidence. Point estimates for within subgroup level are the pooled effect estimates and are represented by a black diamond. The residual I<sup>2</sup> value indicates the inter-study heterogeneity unexplained by the subgroup. CHD – coronary heart disease; FFQ – food frequency questionnaire; NOS – Newcastle-Ottawa Scale; RR – relative risk; 95% CIs – 95% confidence intervals. † Europe vs. Asia 0.92 [0.81, 1.05]; Europe vs. Global 1.09 [0.82, 1.42]; Europe vs. North America 0.80 [0.59, 1.09]; Asia vs. Global 0.85 [0.65, 1.12]; Asia vs. North America 1.15 [0.85, 1.57]; Global vs. North America 1.36 [0.92, 2.01]



## VEGETABLES AND STROKE INCIDENCE

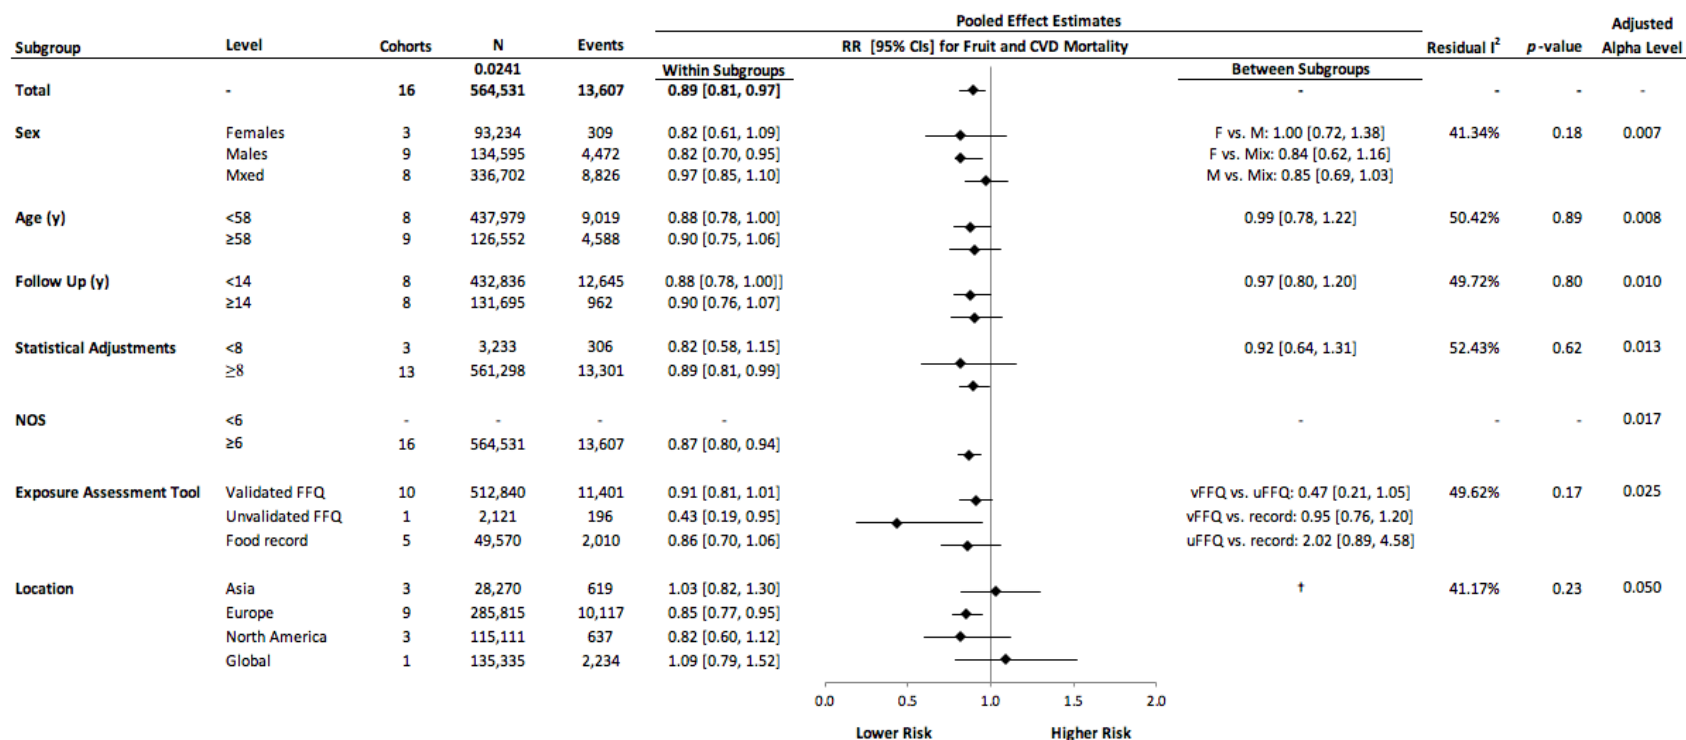

**Figure S186.** Categorical subgroup analyses of intake of vegetables and stroke incidence. Point estimates for within subgroup level are the pooled effect estimates and are represented by a black diamond. The residual I<sup>2</sup> value indicates the inter-study heterogeneity unexplained by the subgroup. CHD – coronary heart disease; FFQ – food frequency questionnaire; NOS – Newcastle-Ottawa Scale; RR – relative risk; 95% CIs – 95% confidence intervals.  
 † Europe vs. Asia 1.21 [0.94, 1.56]; Europe vs. Global 1.28 [0.91, 1.81]; Europe vs. NA 0.96 [0.69, 1.33]; Asia vs. Global 0.94 [0.63, 1.40]; Asia vs. NA 1.26 [0.86, 1.86]; Global vs. NA 1.34 [0.85, 2.10]

## FRUIT AND STROKE MORTALITY

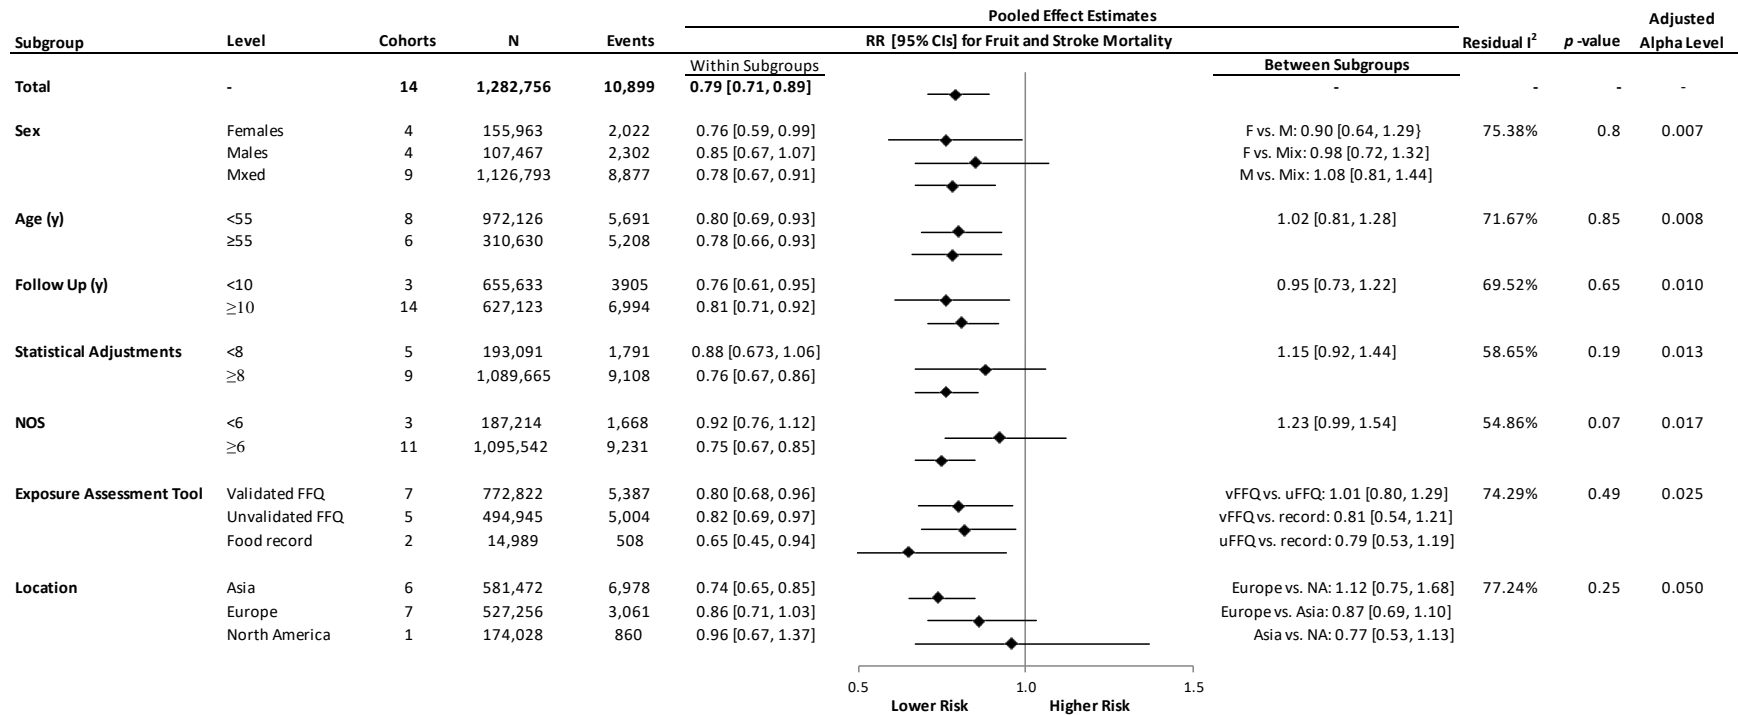

**Figure S187.** Categorical subgroup analyses of fruit intake and stroke mortality. Point estimates for within subgroup level are the pooled effect estimates and are represented by a black diamond. The residual I<sup>2</sup> value indicates the inter-study heterogeneity unexplained by the subgroup. FFQ – food frequency questionnaire; NOS – Newcastle-Ottawa Scale; RR – relative risk; 95% CIs – 95% confidence intervals.

## VEGETABLES AND STROKE MORTALITY

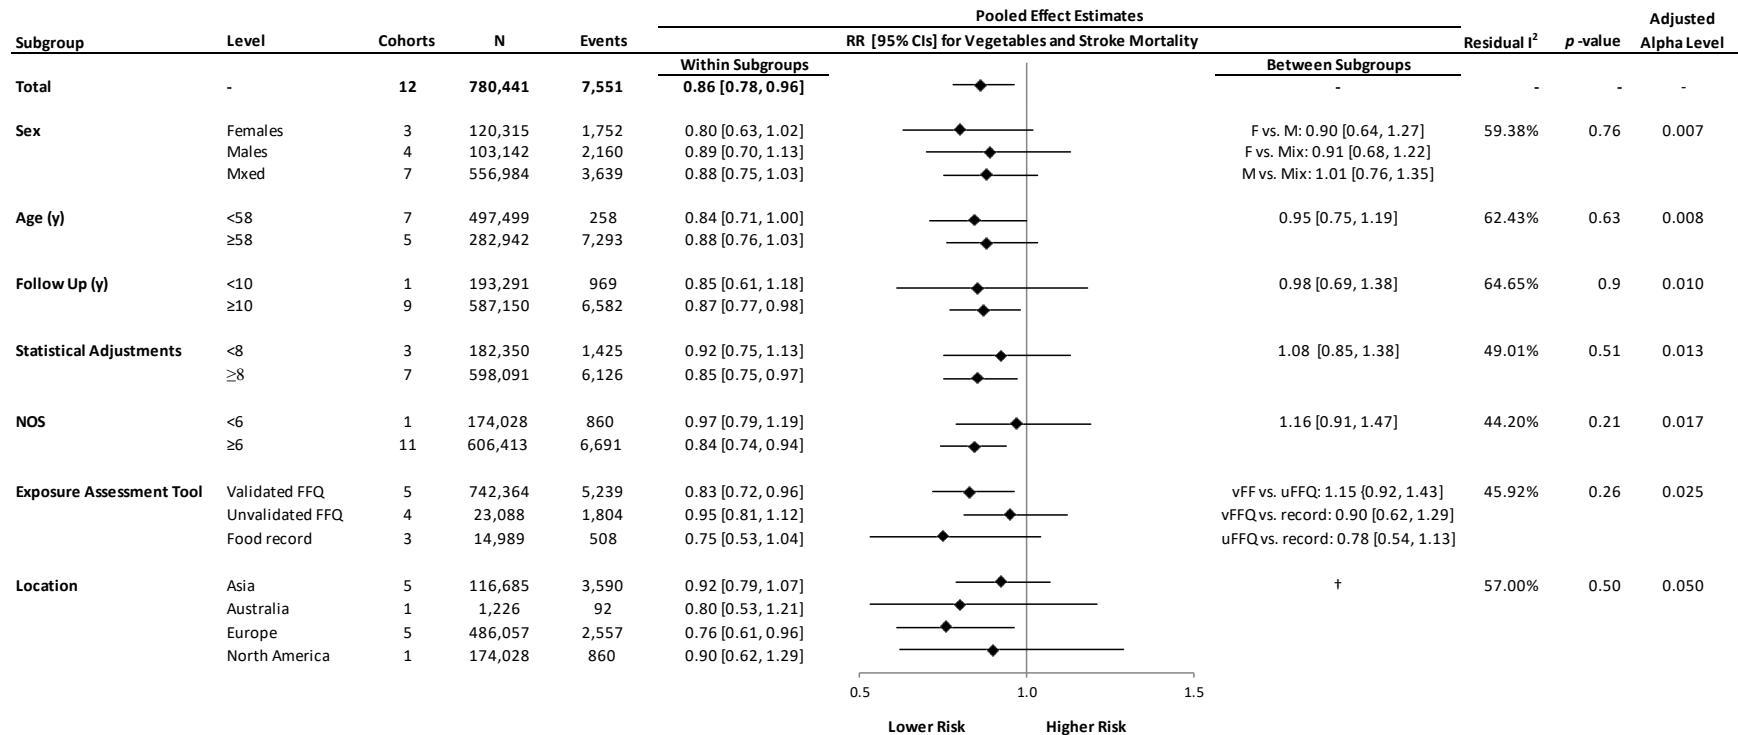

**Figure S188.** Categorical subgroup analyses of intake of vegetables and stroke mortality. Point estimates for within subgroup level are the pooled effect estimates and are represented by a black diamond. The residual I<sup>2</sup> value indicates the inter-study heterogeneity unexplained by the subgroup. FFQ – food frequency questionnaire; NOS – Newcastle-Ottawa Scale; RR – relative risk; 95% CIs – 95% confidence intervals.

† Europe vs. Asia 1.20 [0.92, 1.57]; Europe vs. Australia 1.05 [0.66, 1.67]; Europe vs. North America 1.17 [0.76, 1.80]; Asia vs. Australia 1.44 [0.74, 1.77]; Asia vs. North America 1.03 [0.69, 1.53]; Australia vs. North America 0.90 [0.52, 1.55]

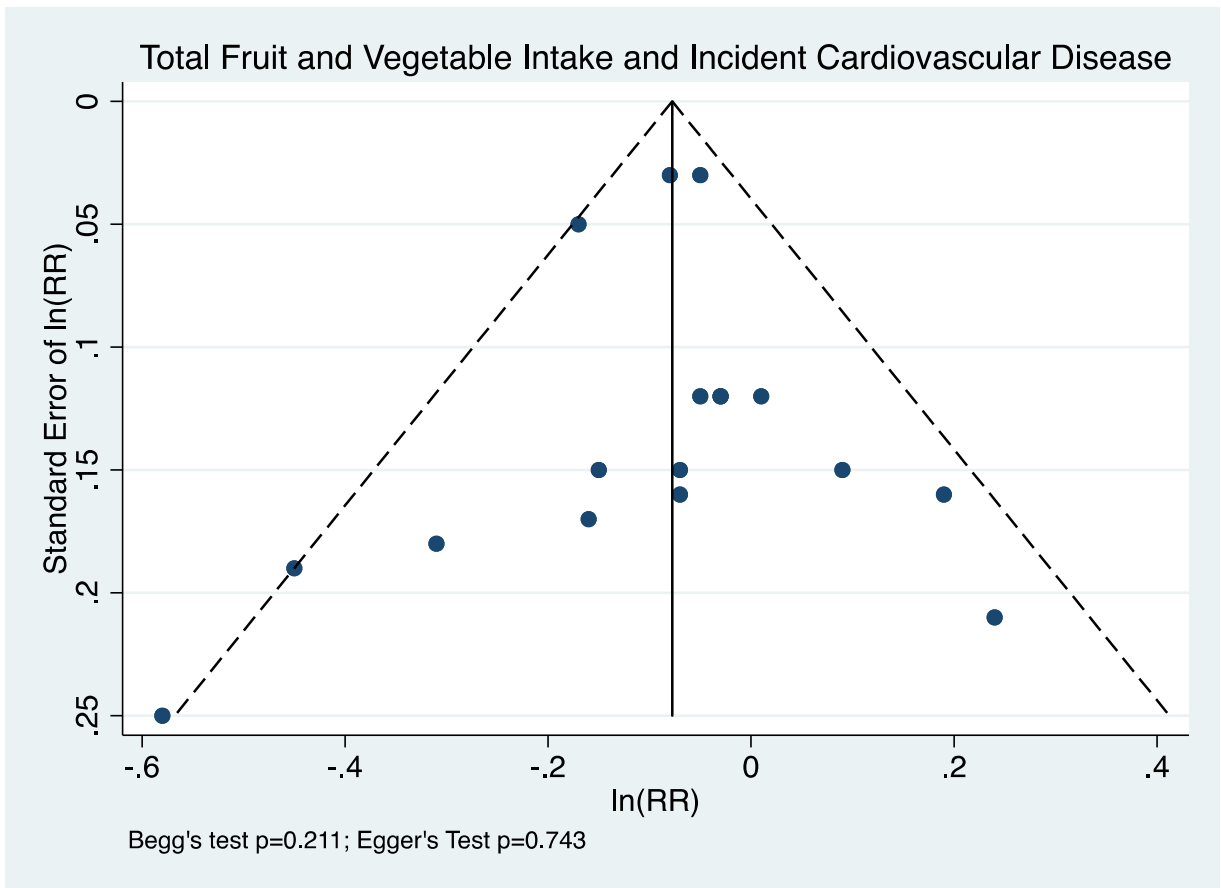

**Figure S189.** Funnel plot of natural logarithm relative risk [Ln(RR)] for cardiovascular disease incidence comparing the highest and lowest quantiles of total fruit and vegetable intake. The vertical line represents the pooled effect estimated expressed as ln(RR). Dashed lines represent pseudo-95% confidence intervals. The circles represent risk estimates for each comparison, and the horizontal lines represent standard errors of the ln(RR).

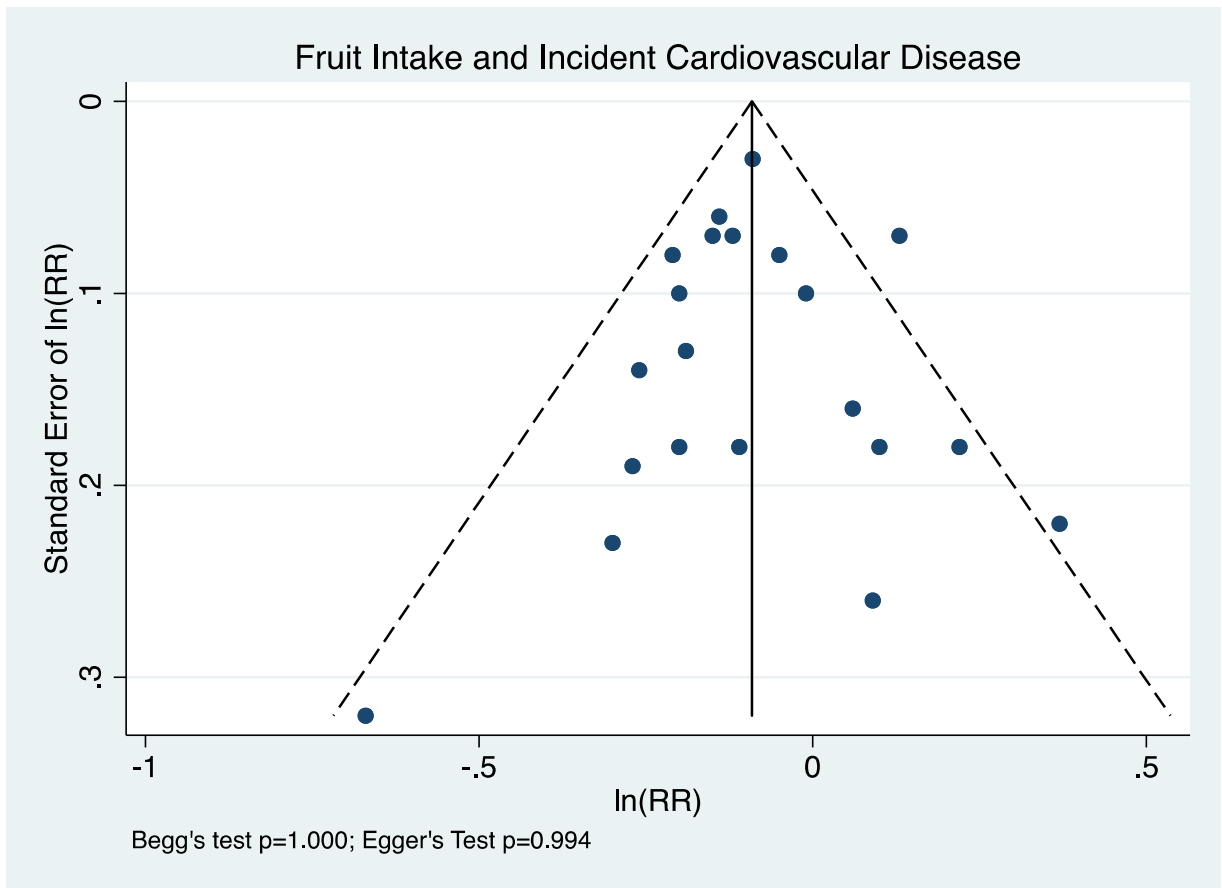

**Figure S190.** Funnel plot of natural logarithm relative risk [Ln(RR)] for cardiovascular disease incidence comparing the highest and lowest quantiles of fruit intake. The vertical line represents the pooled effect estimated expressed as ln(RR). Dashed lines represent pseudo-95% confidence intervals. The circles represent risk estimates for each comparison, and the horizontal lines represent standard errors of the ln(RR).

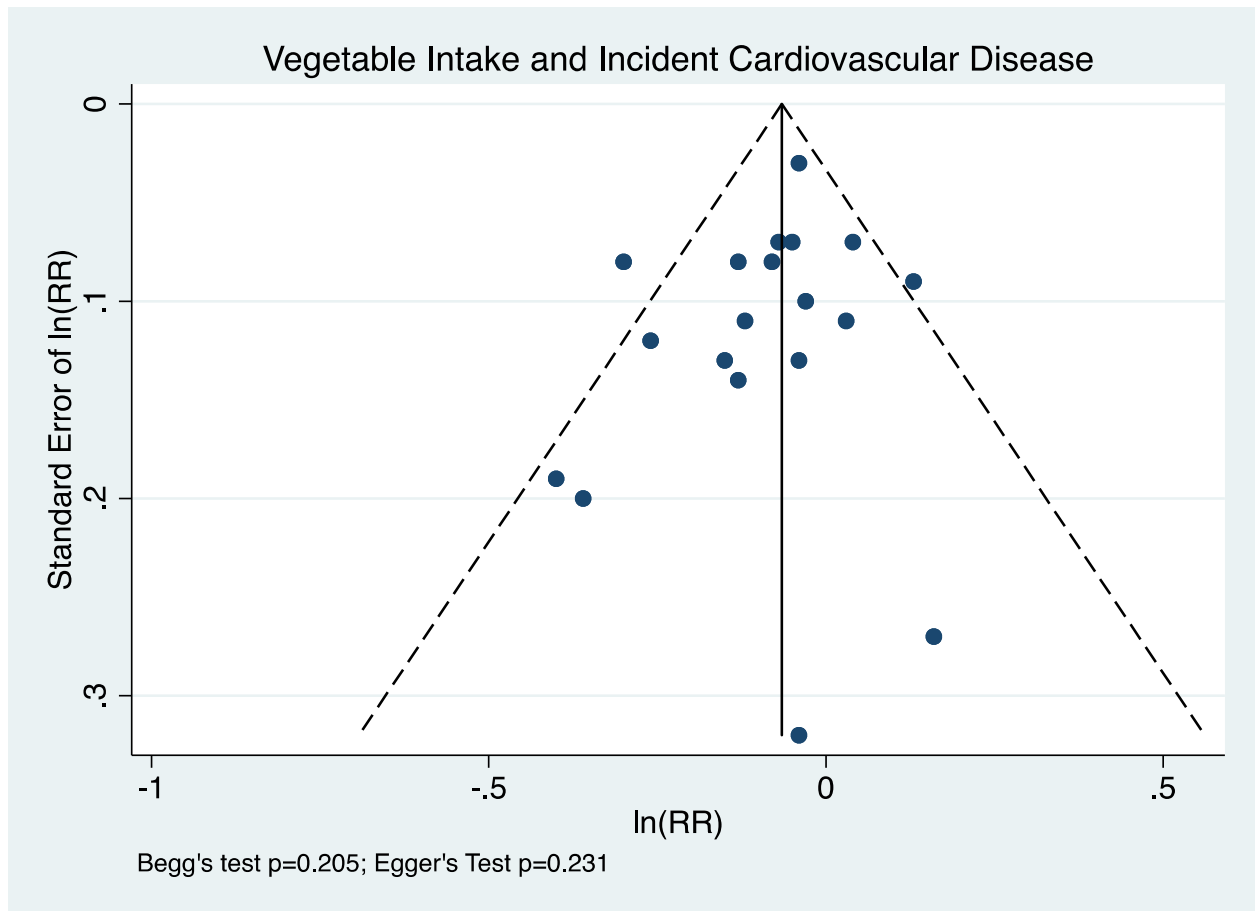

**Figure S191.** Funnel plot of natural logarithm relative risk [Ln(RR)] for cardiovascular disease incidence comparing the highest and lowest quantiles of vegetable intake. The vertical line represents the pooled effect estimated expressed as Ln(RR). Dashed lines represent pseudo-95% confidence intervals. The circles represent risk estimates for each comparison, and the horizontal lines represent standard errors of the Ln(RR).

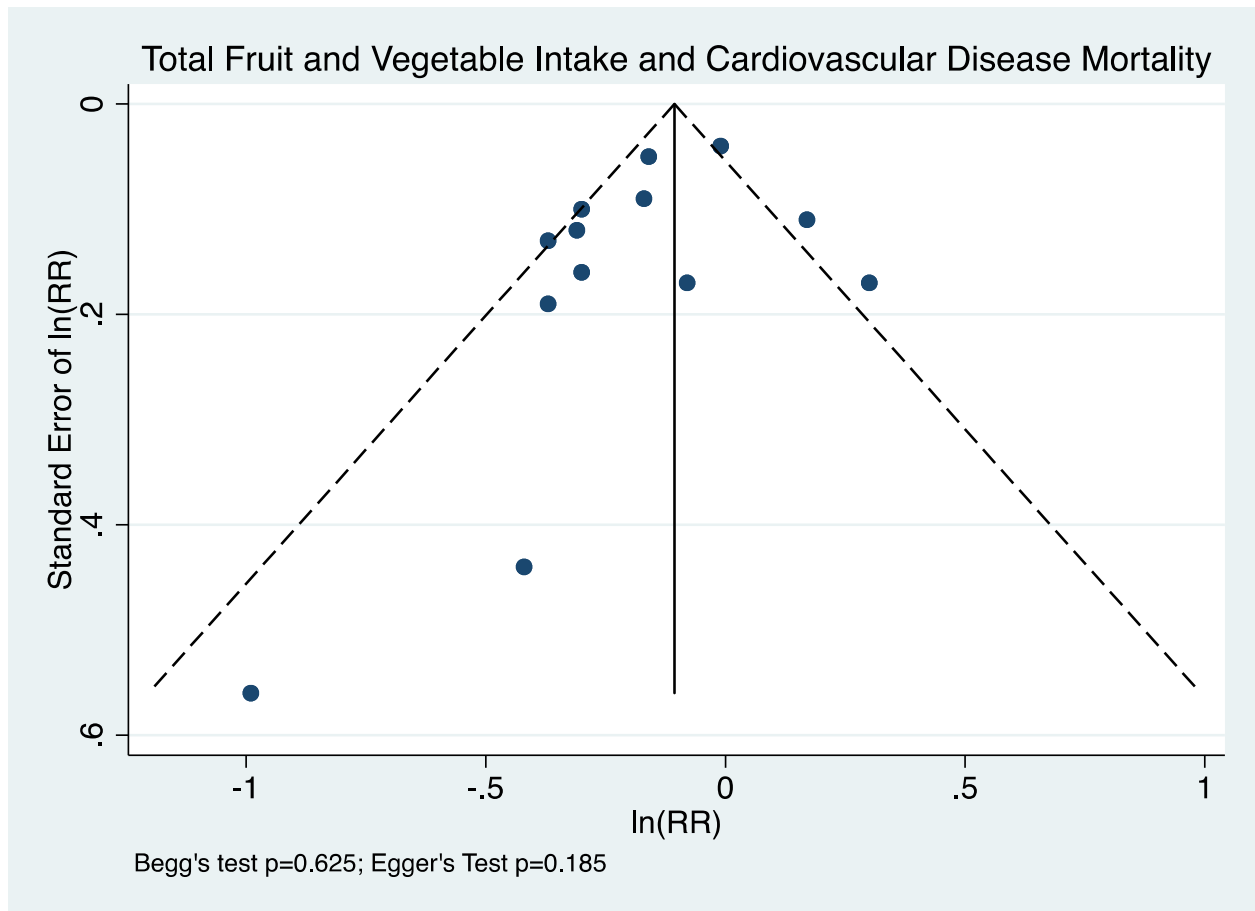

**Figure S192.** Funnel plot of natural logarithm relative risk [Ln(RR)] for cardiovascular disease mortality comparing the highest and lowest quantiles of total fruit and vegetable intake. The vertical line represents the pooled effect estimated expressed as ln(RR). Dashed lines represent pseudo-95% confidence intervals. The circles represent risk estimates for each comparison, and the horizontal lines represent standard errors of the ln(RR).

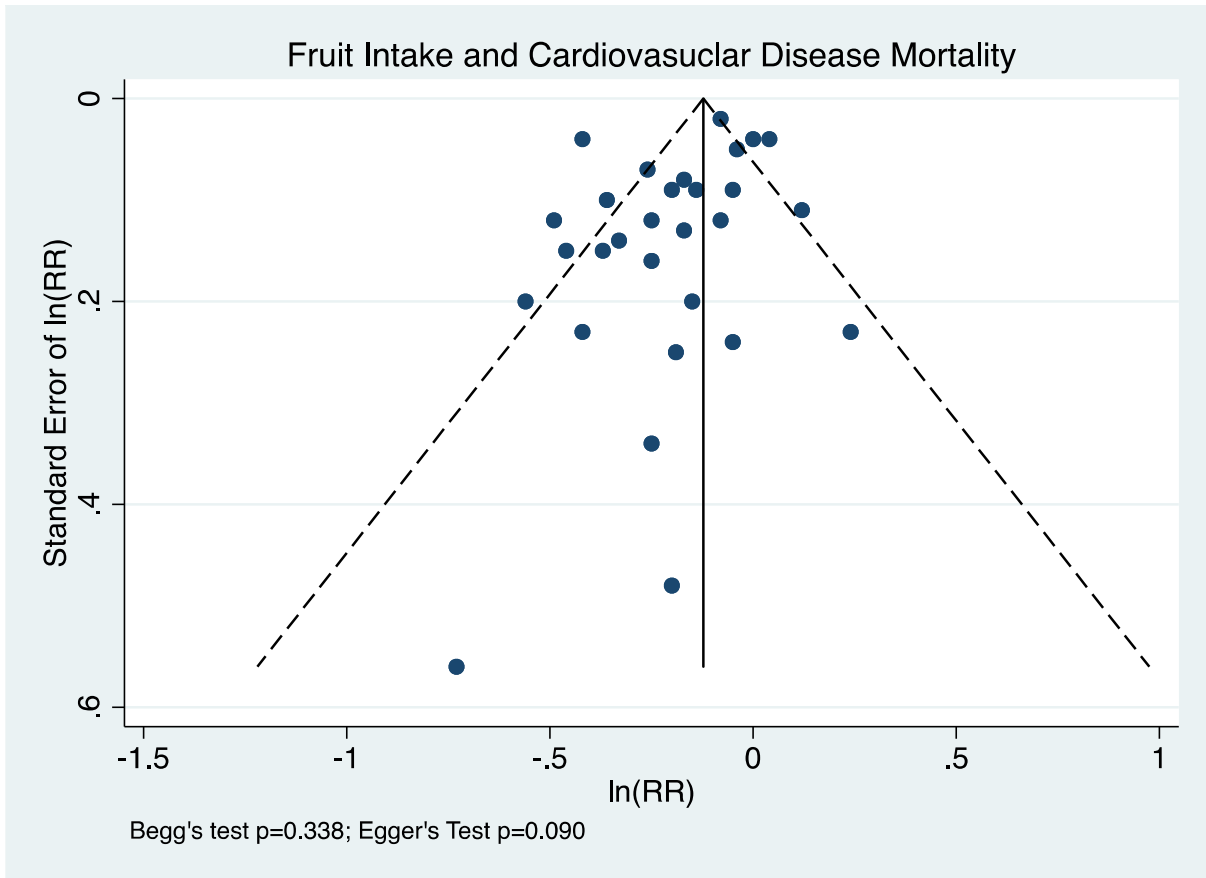

**Figure S193.** Funnel plot of natural logarithm relative risk [Ln(RR)] for cardiovascular disease mortality comparing the highest and lowest quantiles of fruit intake. The vertical line represents the pooled effect estimated expressed as ln(RR). Dashed lines represent pseudo-95% confidence intervals. The circles represent risk estimates for each comparison, and the horizontal lines represent standard errors of the ln(RR).



## Vegetable Intake and Cardiovascular Disease Mortality

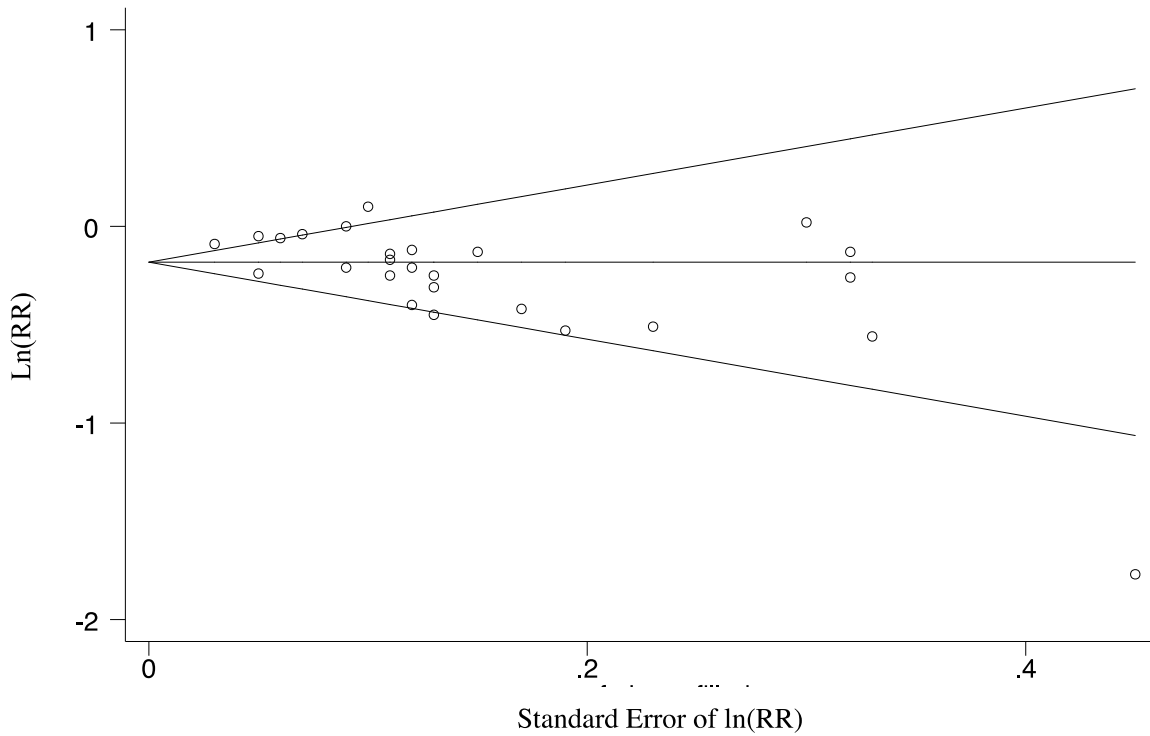

Imputed RR accounting for publication bias: N/A

P-value: N/A

**Figure S194.** Funnel plot for trim-and-fill analysis for coronary heart disease mortality comparing the highest and lowest quantiles of vegetable intake. The horizontal line represents the pooled effect estimate expressed as the natural logarithm of relative risk [Ln(RR)]. The diagonal lines represent the pseudo-95% confidence intervals of the RR. The clear circles represent the effect estimates for each included study.

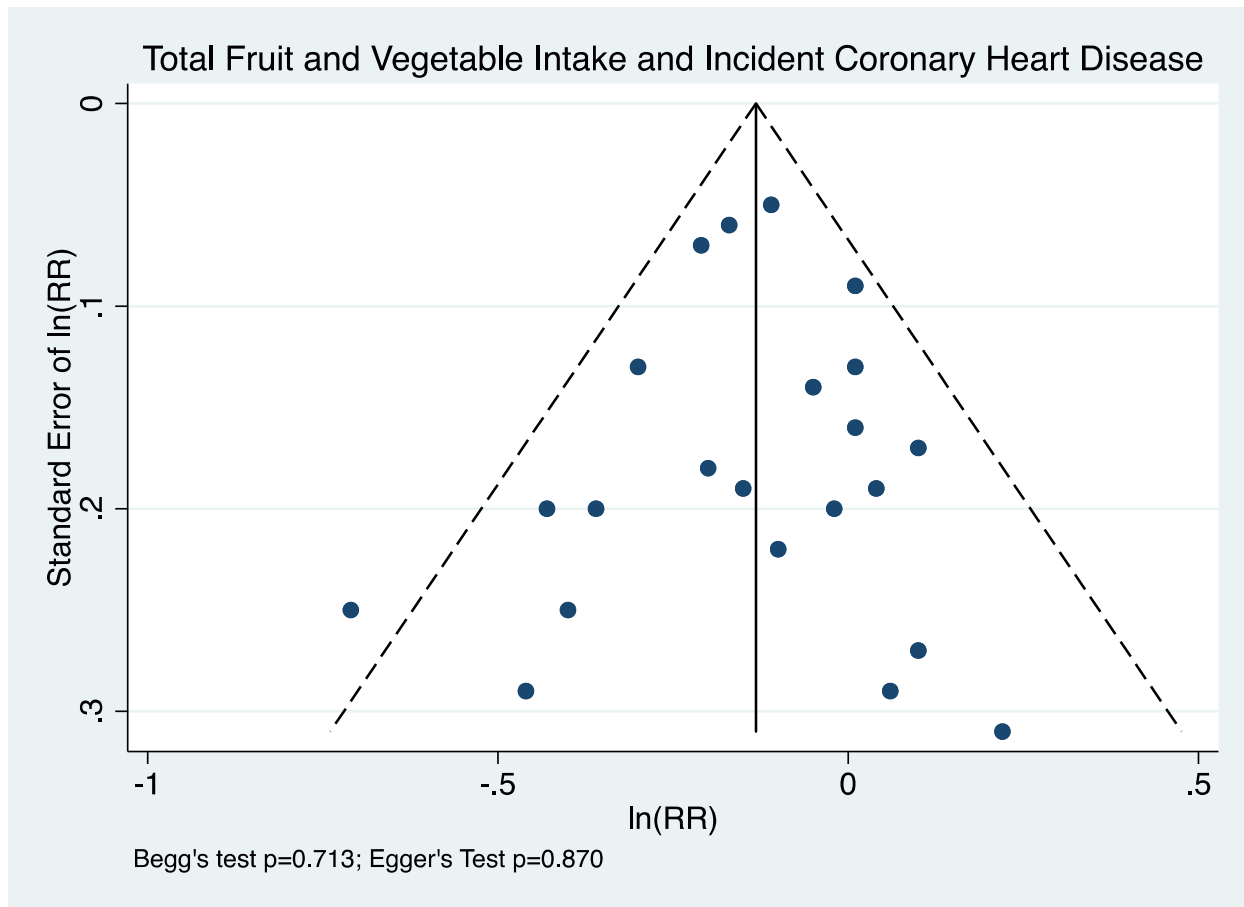

**Figure S195.** Funnel plot of natural logarithm relative risk [Ln(RR)] for coronary heart disease incidence comparing the highest and lowest quantiles of total fruit and vegetable intake. The vertical line represents the pooled effect estimated expressed as ln(RR). Dashed lines represent pseudo-95% confidence intervals. The circles represent risk estimates for each comparison, and the horizontal lines represent standard errors of the ln(RR).

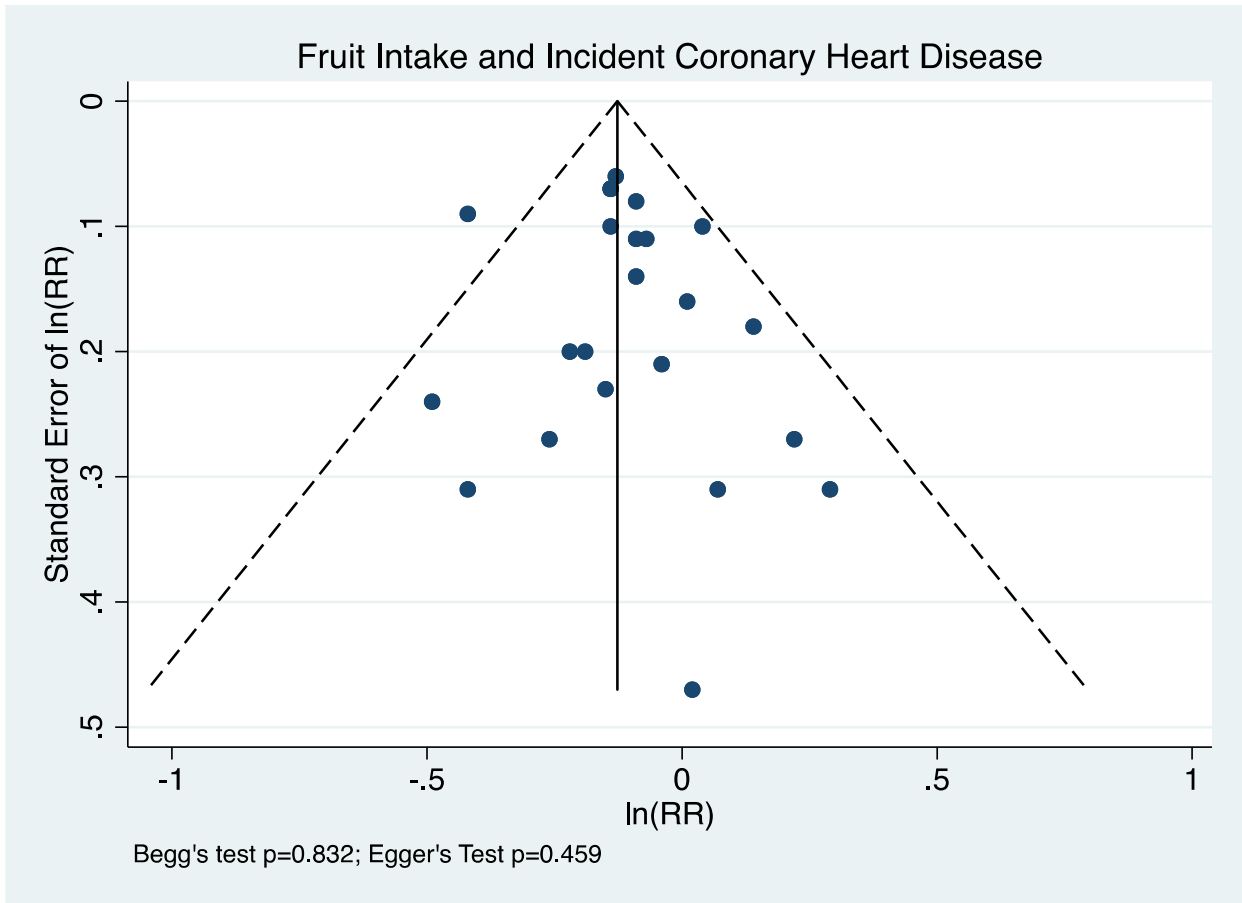

**Figure S196.** Funnel plot of natural logarithm relative risk [Ln(RR)] for coronary heart disease comparing the highest and lowest quantiles of fruit intake. The vertical line represents the pooled effect estimated expressed as ln(RR). Dashed lines represent pseudo-95% confidence intervals. The circles represent risk estimates for each comparison, and the horizontal lines represent standard errors of the ln(RR).

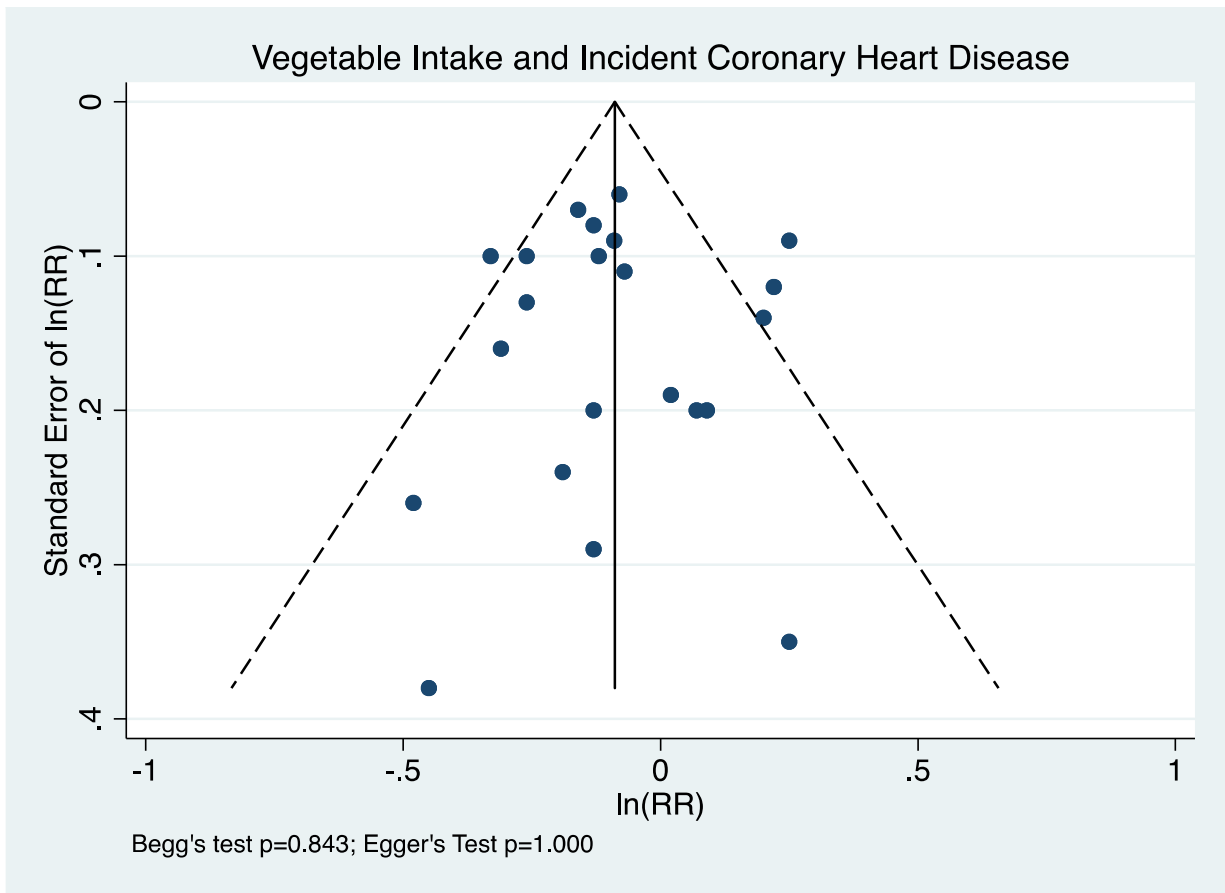

**Figure S197.** Funnel plot of natural logarithm relative risk [Ln(RR)] for coronary heart disease incidence comparing the highest and lowest quantiles of vegetable intake. The vertical line represents the pooled effect estimated expressed as ln(RR). Dashed lines represent pseudo-95% confidence intervals. The circles represent risk estimates for each comparison, and the horizontal lines represent standard errors of the ln(RR).

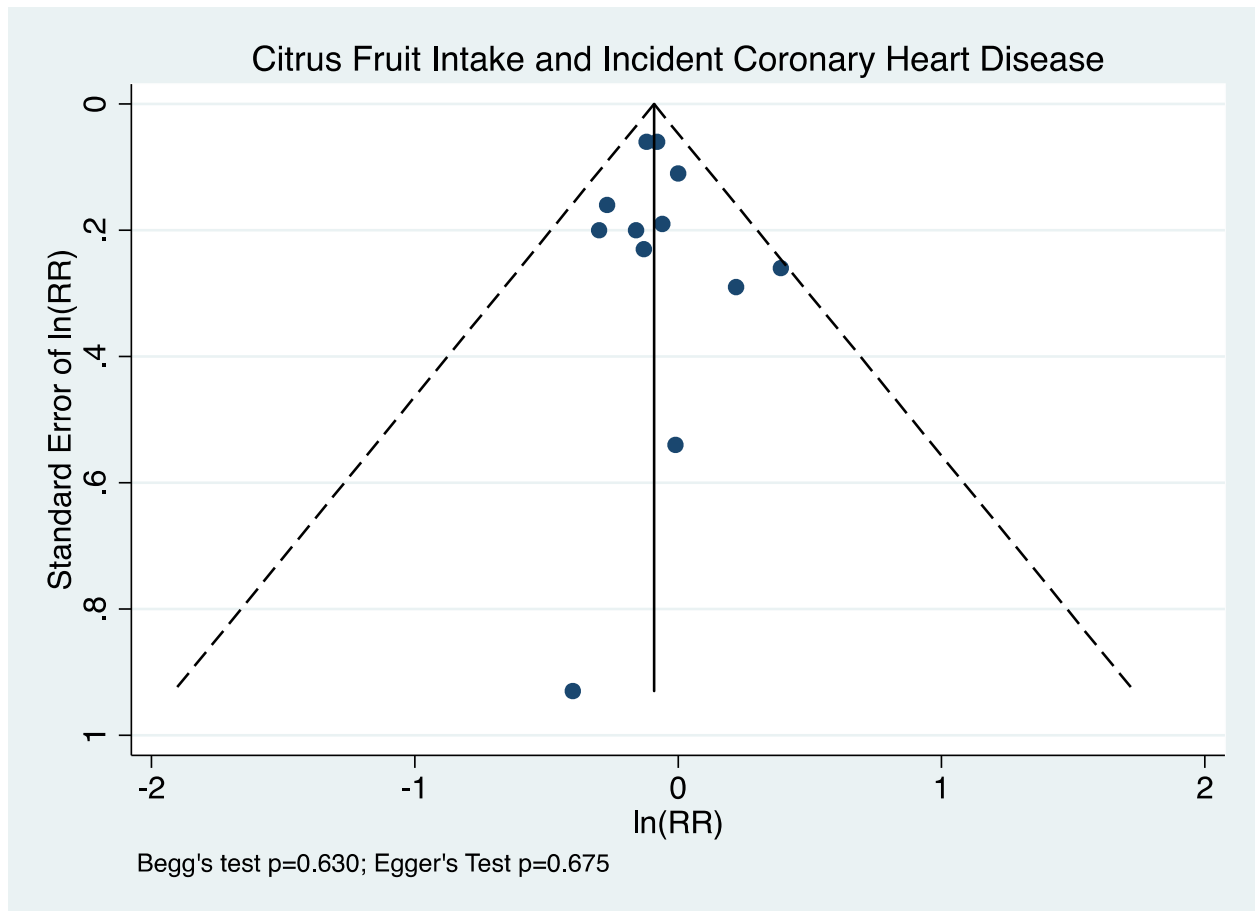

**Figure S198.** Funnel plot of natural logarithm relative risk [ $\ln(\text{RR})$ ] for coronary heart disease incidence comparing the highest and lowest quantiles of citrus fruit intake. The vertical line represents the pooled effect estimated expressed as  $\ln(\text{RR})$ . Dashed lines represent pseudo-95% confidence intervals. The circles represent risk estimates for each comparison, and the horizontal lines represent standard errors of the  $\ln(\text{RR})$ .

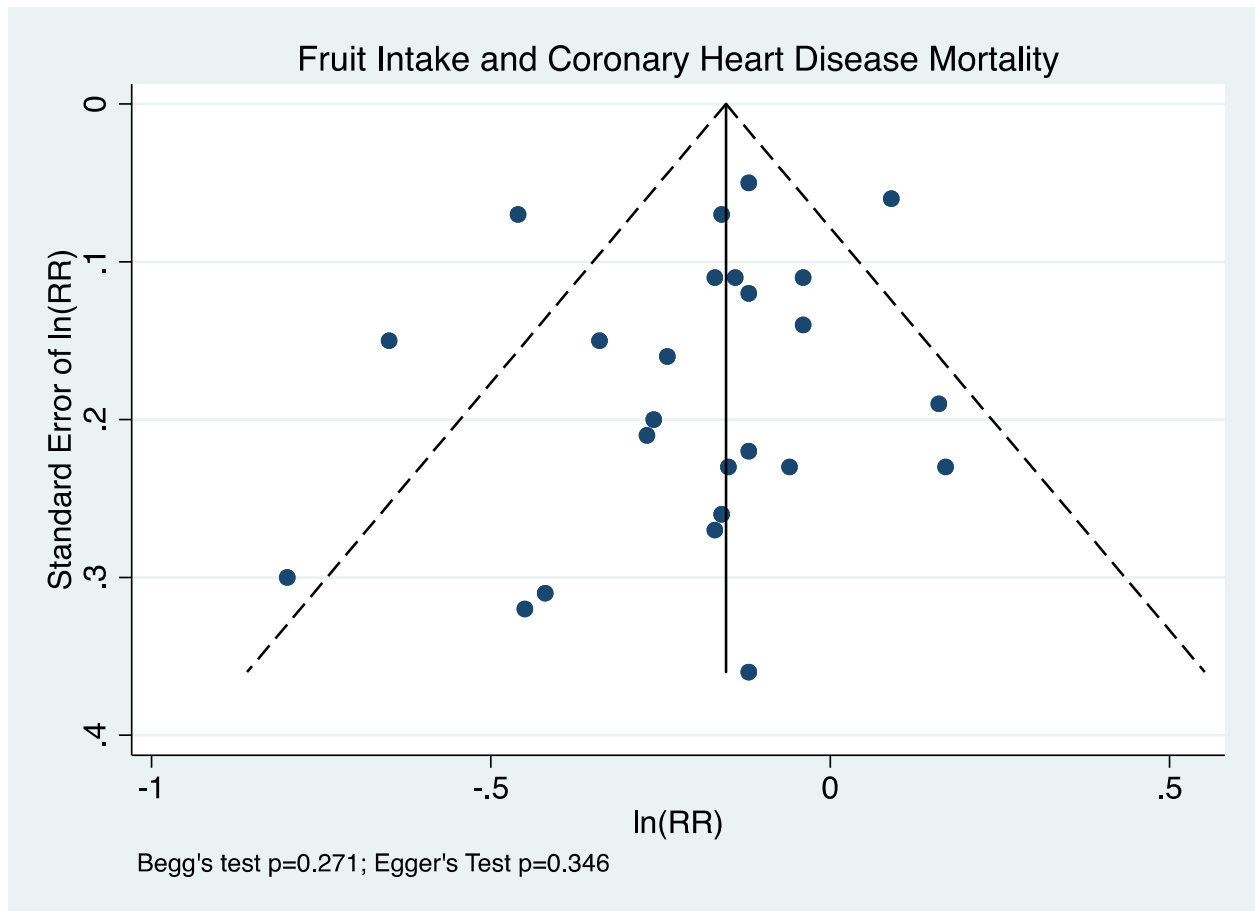

**Figure S199.** Funnel plot of natural logarithm relative risk [Ln(RR)] for coronary heart disease mortality comparing the highest and lowest quantiles of fruit intake. The vertical line represents the pooled effect estimated expressed as ln(RR). Dashed lines represent pseudo-95% confidence intervals. The circles represent risk estimates for each comparison, and the horizontal lines represent standard errors of the ln(RR).

### Vegetable Intake and Coronary Heart Disease Mortality

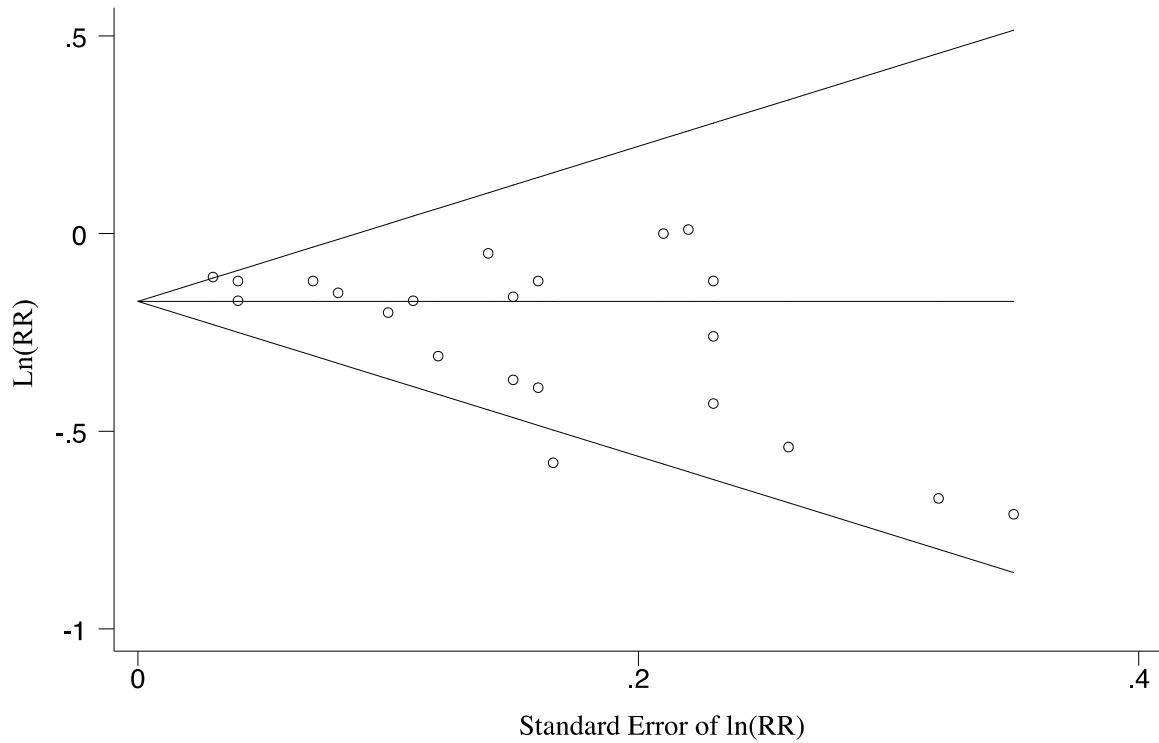

Imputed RR accounting for publication bias: N/A  
P-value: N/A

**Figure S200.** Funnel plot for trim-and-fill analysis for coronary heart disease mortality comparing the highest and lowest quantiles of vegetable intake. The horizontal line represents the pooled effect estimate expressed as the natural logarithm of relative risk [Ln(RR)]. The diagonal lines represent the pseudo-95% confidence intervals of the RR. The clear circles represent the effect estimates for each included study.

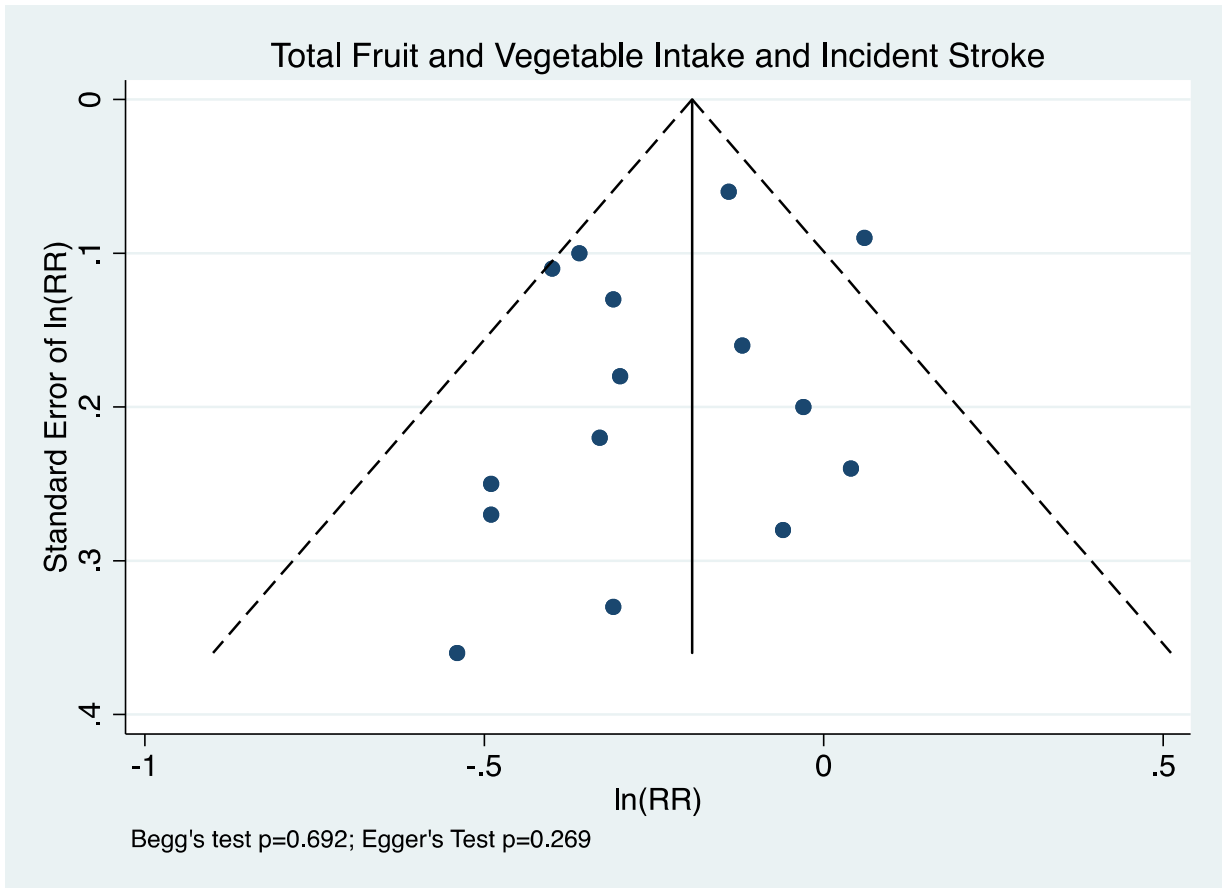

**Figure S201.** Funnel plot of natural logarithm relative risk [Ln(RR)] for stroke incidence comparing the highest and lowest quantiles of total fruit and vegetable intake. The vertical line represents the pooled effect estimated expressed as ln(RR). Dashed lines represent pseudo-95% confidence intervals. The circles represent risk estimates for each comparison, and the horizontal lines represent standard errors of the ln(RR).



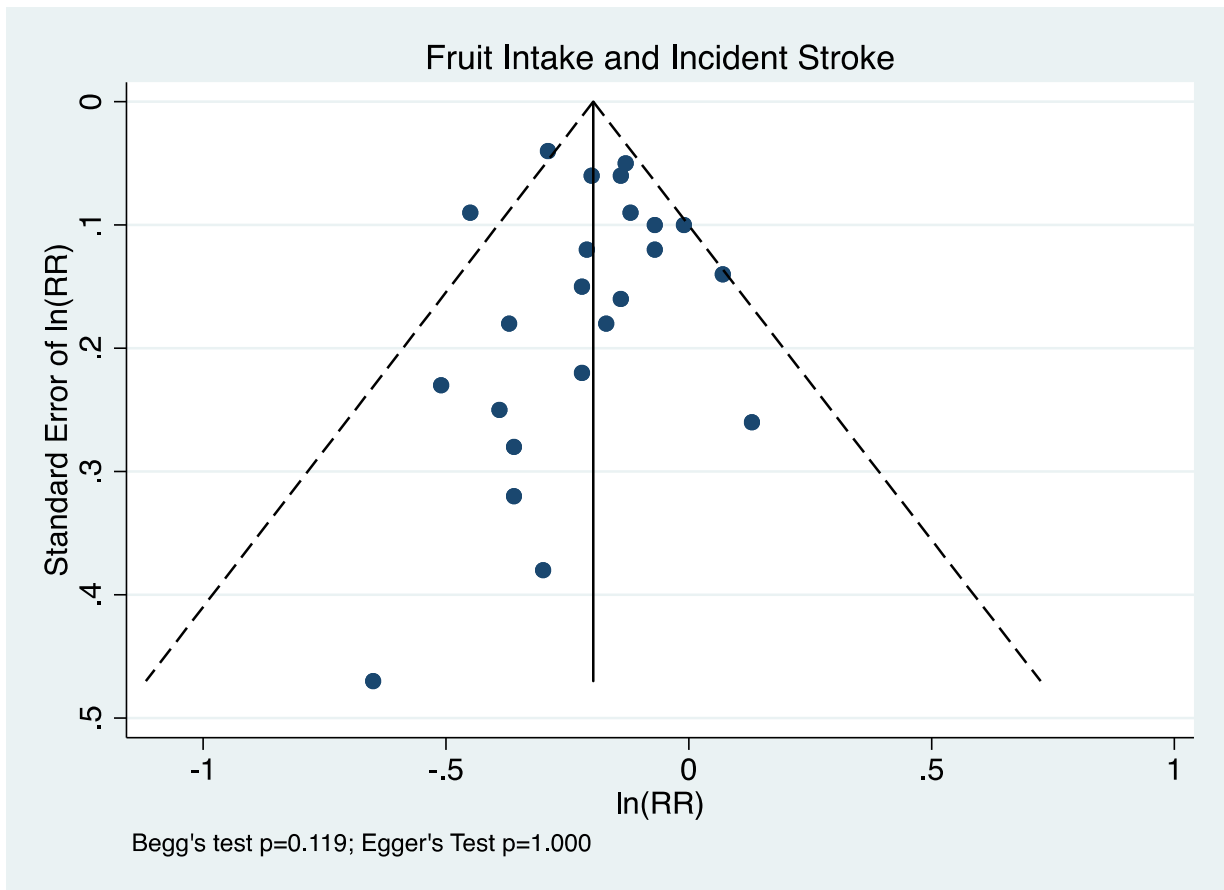

**Figure S202.** Funnel plot of natural logarithm relative risk [Ln(RR)] for stroke incidence comparing the highest and lowest quantiles of fruit intake. The vertical line represents the pooled effect estimated expressed as ln(RR). Dashed lines represent pseudo-95% confidence intervals. The circles represent risk estimates for each comparison, and the horizontal lines represent standard errors of the ln(RR).

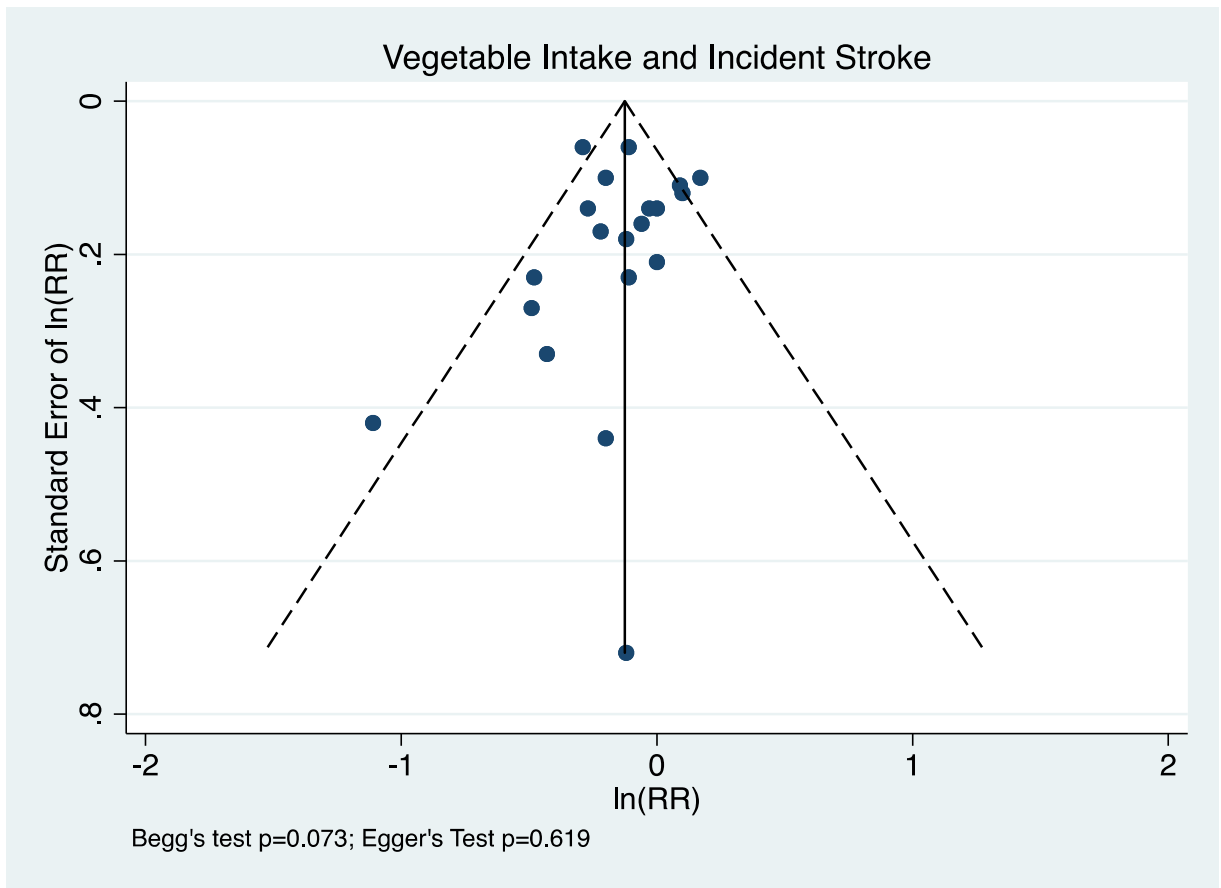

### Fruit Intake and Stroke Mortality

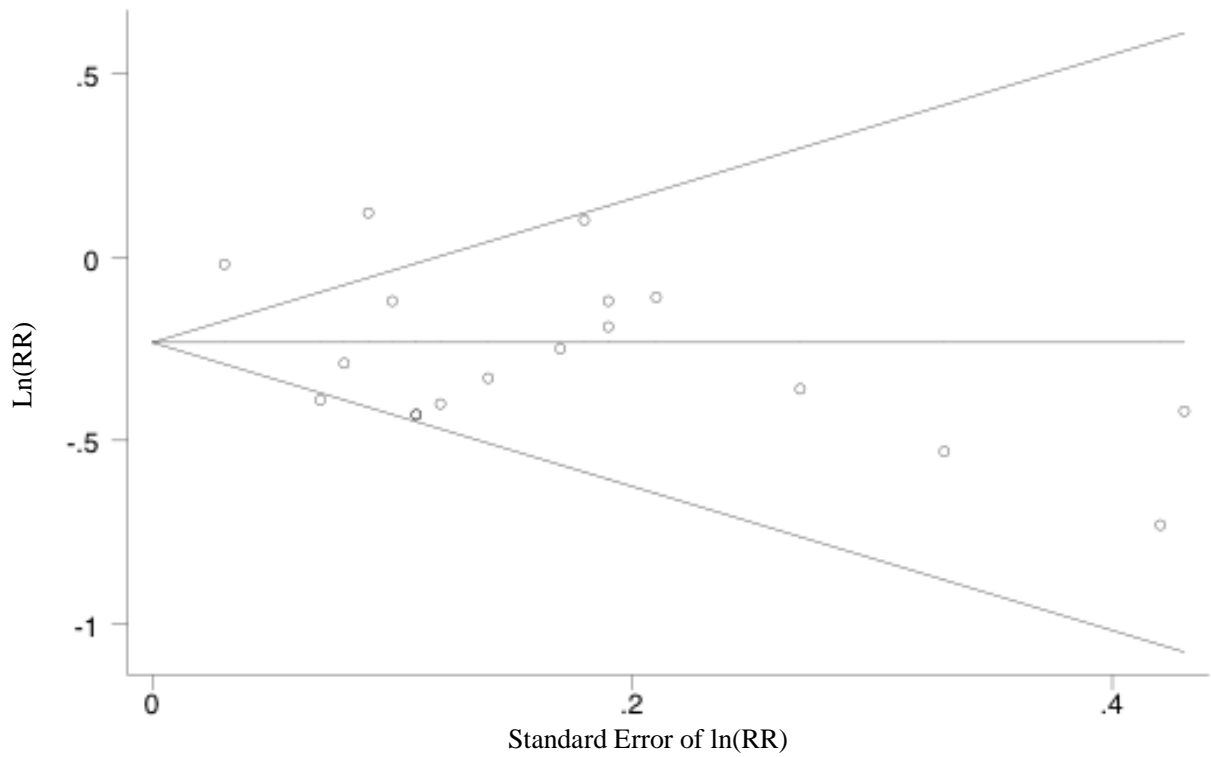

Imputed RR accounting for publication bias: N/A  
P-value: N/A

**Figure S204.** Funnel plot of natural logarithm relative risk [Ln(RR)] for stroke mortality comparing the highest and lowest quantiles of fruit intake. The vertical line represents the pooled effect estimated expressed as ln(RR). Dashed lines represent pseudo-95% confidence intervals. The circles represent risk estimates for each comparison, and the horizontal lines represent standard errors of the ln(RR).

### Vegetable Intake and Stroke Mortality

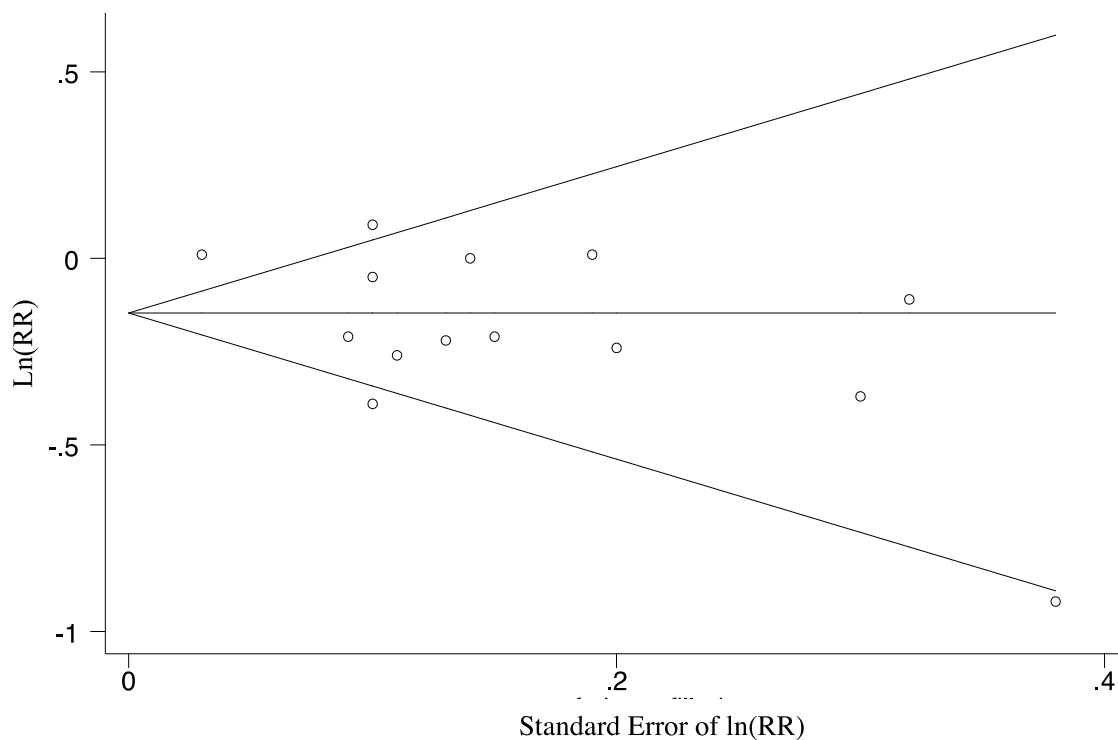

Imputed RR accounting for publication bias: N/A

P-value: N/A

**Figure S205.** Funnel plot for trim-and-fill analysis for stroke mortality comparing the highest and lowest quantiles of vegetable intake. The horizontal line represents the pooled effect estimate expressed as the natural logarithm of relative risk [ $\ln(RR)$ ]. The diagonal lines represent the pseudo-95% confidence intervals of the RR. The clear circles represent the effect estimates for each included study.
